# Supplementary material for: Local Variability Mediates Vulnerability of Trout Populations to Land Use and Climate Change
Source: PLoS One. 2015 Aug 21;10(8):e0135334. doi: 10.1371/journal.pone.0135334 (PMC4546676; doi:10.1371/journal.pone.0135334)
Supplement: S1 File — Calibration calculations and values for environmental regimes can be found in [33]. (XLSX) [file pone.0135334.s003.xlsx]

## Sheet: fry emergence
Scenario	Replicate	Reach	Simulation year	day of year	FryEmerged
baseline	1	Trask-Gus	1	183	402
baseline	1	Trask-Gus	1	189	130
baseline	1	Trask-Gus	1	190	129
baseline	1	Trask-Gus	1	191	442
baseline	1	Trask-Gus	1	191	438
baseline	1	Trask-Gus	1	191	129
baseline	1	Trask-Gus	1	196	0
baseline	1	Trask-Gus	1	196	139
baseline	1	Trask-Gus	1	197	109
baseline	1	Trask-Gus	1	200	356
baseline	1	Trask-Gus	1	201	398
baseline	1	Trask-Gus	1	202	460
baseline	1	Trask-Gus	1	206	161
baseline	1	Trask-Gus	1	206	147
baseline	1	Trask-Gus	1	208	167
baseline	1	Trask-Gus	1	209	163
baseline	2	Trask-Gus	1	183	269
baseline	2	Trask-Gus	1	188	0
baseline	2	Trask-Gus	1	195	128
baseline	2	Trask-Gus	1	196	0
baseline	2	Trask-Gus	1	196	392
baseline	2	Trask-Gus	1	200	939
baseline	2	Trask-Gus	1	201	409
baseline	2	Trask-Gus	1	201	157
baseline	2	Trask-Gus	1	202	584
baseline	2	Trask-Gus	1	202	3
baseline	2	Trask-Gus	1	202	1122
baseline	2	Trask-Gus	1	202	417
baseline	2	Trask-Gus	1	203	132
baseline	2	Trask-Gus	1	204	141
baseline	2	Trask-Gus	1	205	1419
baseline	2	Trask-Gus	1	207	147
baseline	2	Trask-Gus	1	208	167
baseline	2	Trask-Gus	1	211	176
baseline	3	Trask-Gus	1	183	2
baseline	3	Trask-Gus	1	189	282
baseline	3	Trask-Gus	1	189	139
baseline	3	Trask-Gus	1	189	130
baseline	3	Trask-Gus	1	191	18
baseline	3	Trask-Gus	1	196	145
baseline	3	Trask-Gus	1	197	685
baseline	3	Trask-Gus	1	197	148
baseline	3	Trask-Gus	1	200	154
baseline	3	Trask-Gus	1	202	981
baseline	3	Trask-Gus	1	206	751
baseline	3	Trask-Gus	1	206	172
baseline	3	Trask-Gus	1	208	350
baseline	3	Trask-Gus	1	209	95
baseline	3	Trask-Gus	1	209	172
baseline	3	Trask-Gus	1	211	957
baseline	4	Trask-Gus	1	189	6
baseline	4	Trask-Gus	1	190	347
baseline	4	Trask-Gus	1	199	141
baseline	4	Trask-Gus	1	205	157
baseline	4	Trask-Gus	1	210	161
baseline	5	Trask-Gus	1	189	363
baseline	5	Trask-Gus	1	189	339
baseline	5	Trask-Gus	1	189	123
baseline	5	Trask-Gus	1	195	149
baseline	5	Trask-Gus	1	195	149
baseline	5	Trask-Gus	1	195	141
baseline	5	Trask-Gus	1	196	52
baseline	5	Trask-Gus	1	196	124
baseline	5	Trask-Gus	1	197	1035
baseline	5	Trask-Gus	1	202	164
baseline	5	Trask-Gus	1	204	152
baseline	1	Trask-Pothole	1	188	125
baseline	2	Trask-Pothole	1	208	156
baseline	3	Trask-Pothole	1	208	364
baseline	4	Trask-Pothole	1	180	88
baseline	4	Trask-Pothole	1	192	130
baseline	4	Trask-Pothole	1	194	134
baseline	4	Trask-Pothole	1	196	141
baseline	4	Trask-Pothole	1	210	140
baseline	5	Trask-Pothole	1	179	106
baseline	5	Trask-Pothole	1	179	93
baseline	5	Trask-Pothole	1	180	309
baseline	5	Trask-Pothole	1	192	163
baseline	5	Trask-Pothole	1	193	75
baseline	5	Trask-Pothole	1	194	6
baseline	5	Trask-Pothole	1	195	132
baseline	5	Trask-Pothole	1	202	106
baseline	5	Trask-Pothole	1	211	138
baseline	5	Trask-Pothole	1	212	578
baseline	1	Trask-Rock	1	203	283
baseline	1	Trask-Rock	1	203	143
baseline	1	Trask-Rock	1	206	146
baseline	1	Trask-Rock	1	206	109
baseline	2	Trask-Rock	1	187	338
baseline	2	Trask-Rock	1	197	139
baseline	2	Trask-Rock	1	197	241
baseline	2	Trask-Rock	1	210	389
baseline	3	Trask-Rock	1	185	138
baseline	3	Trask-Rock	1	187	216
baseline	3	Trask-Rock	1	187	90
baseline	3	Trask-Rock	1	196	120
baseline	3	Trask-Rock	1	197	106
baseline	3	Trask-Rock	1	200	113
baseline	3	Trask-Rock	1	207	313
baseline	4	Trask-Rock	1	187	19
baseline	4	Trask-Rock	1	187	139
baseline	4	Trask-Rock	1	197	149
baseline	4	Trask-Rock	1	206	84
baseline	5	Trask-Rock	1	193	87
baseline	5	Trask-Rock	1	208	154
baseline	5	Trask-Rock	1	209	583
CC	1	Trask-Gus	1	183	1389
CC	1	Trask-Gus	1	183	334
CC	1	Trask-Gus	1	190	136
CC	1	Trask-Gus	1	195	162
CC	1	Trask-Gus	1	195	166
CC	1	Trask-Gus	1	204	205
CC	1	Trask-Gus	1	206	211
CC	1	Trask-Gus	1	210	194
CC	1	Trask-Gus	1	211	222
CC	2	Trask-Gus	1	189	1007
CC	2	Trask-Gus	1	190	133
CC	2	Trask-Gus	1	196	142
CC	2	Trask-Gus	1	197	402
CC	2	Trask-Gus	1	197	164
CC	2	Trask-Gus	1	199	165
CC	2	Trask-Gus	1	201	1
CC	2	Trask-Gus	1	203	157
CC	2	Trask-Gus	1	209	2182
CC	2	Trask-Gus	1	211	172
CC	3	Trask-Gus	1	183	121
CC	3	Trask-Gus	1	189	1113
CC	3	Trask-Gus	1	189	145
CC	3	Trask-Gus	1	189	130
CC	3	Trask-Gus	1	189	411
CC	3	Trask-Gus	1	190	110
CC	3	Trask-Gus	1	195	154
CC	3	Trask-Gus	1	195	148
CC	3	Trask-Gus	1	197	161
CC	3	Trask-Gus	1	199	159
CC	3	Trask-Gus	1	200	2
CC	3	Trask-Gus	1	204	455
CC	3	Trask-Gus	1	204	457
CC	3	Trask-Gus	1	204	171
CC	3	Trask-Gus	1	204	145
CC	4	Trask-Gus	1	183	875
CC	4	Trask-Gus	1	189	167
CC	4	Trask-Gus	1	195	2
CC	4	Trask-Gus	1	195	49
CC	4	Trask-Gus	1	196	1435
CC	4	Trask-Gus	1	196	193
CC	4	Trask-Gus	1	196	185
CC	4	Trask-Gus	1	196	182
CC	4	Trask-Gus	1	200	184
CC	4	Trask-Gus	1	202	2
CC	4	Trask-Gus	1	203	178
CC	4	Trask-Gus	1	206	168
CC	4	Trask-Gus	1	209	195
CC	5	Trask-Gus	1	189	104
CC	5	Trask-Gus	1	189	137
CC	5	Trask-Gus	1	195	143
CC	5	Trask-Gus	1	196	147
CC	5	Trask-Gus	1	196	523
CC	5	Trask-Gus	1	204	492
CC	5	Trask-Gus	1	207	485
CC	5	Trask-Gus	1	209	493
CC	1	Trask-Pothole	1	188	125
CC	2	Trask-Pothole	1	208	156
CC	3	Trask-Pothole	1	208	364
CC	4	Trask-Pothole	1	180	88
CC	4	Trask-Pothole	1	192	130
CC	4	Trask-Pothole	1	194	134
CC	4	Trask-Pothole	1	196	141
CC	4	Trask-Pothole	1	210	140
CC	5	Trask-Pothole	1	179	106
CC	5	Trask-Pothole	1	179	93
CC	5	Trask-Pothole	1	180	309
CC	5	Trask-Pothole	1	192	163
CC	5	Trask-Pothole	1	193	75
CC	5	Trask-Pothole	1	194	6
CC	5	Trask-Pothole	1	195	132
CC	5	Trask-Pothole	1	202	106
CC	5	Trask-Pothole	1	211	138
CC	5	Trask-Pothole	1	212	578
CC	1	Trask-Rock	1	203	283
CC	1	Trask-Rock	1	203	143
CC	1	Trask-Rock	1	206	146
CC	1	Trask-Rock	1	206	109
CC	2	Trask-Rock	1	187	338
CC	2	Trask-Rock	1	197	139
CC	2	Trask-Rock	1	197	241
CC	2	Trask-Rock	1	210	389
CC	3	Trask-Rock	1	185	138
CC	3	Trask-Rock	1	187	216
CC	3	Trask-Rock	1	187	90
CC	3	Trask-Rock	1	196	120
CC	3	Trask-Rock	1	197	106
CC	3	Trask-Rock	1	200	113
CC	3	Trask-Rock	1	207	313
CC	4	Trask-Rock	1	187	19
CC	4	Trask-Rock	1	187	139
CC	4	Trask-Rock	1	197	149
CC	4	Trask-Rock	1	206	84
CC	5	Trask-Rock	1	193	87
CC	5	Trask-Rock	1	208	154
CC	5	Trask-Rock	1	209	583
FH	1	Trask-Gus	1	181	8
FH	1	Trask-Gus	1	183	315
FH	1	Trask-Gus	1	189	132
FH	1	Trask-Gus	1	189	4
FH	1	Trask-Gus	1	195	143
FH	1	Trask-Gus	1	196	566
FH	1	Trask-Gus	1	199	556
FH	1	Trask-Gus	1	202	979
FH	1	Trask-Gus	1	203	138
FH	1	Trask-Gus	1	204	354
FH	1	Trask-Gus	1	205	222
FH	1	Trask-Gus	1	211	367
FH	1	Trask-Gus	1	211	147
FH	2	Trask-Gus	1	183	1
FH	2	Trask-Gus	1	183	5
FH	2	Trask-Gus	1	190	0
FH	2	Trask-Gus	1	190	338
FH	2	Trask-Gus	1	195	0
FH	2	Trask-Gus	1	195	143
FH	2	Trask-Gus	1	195	140
FH	2	Trask-Gus	1	196	373
FH	2	Trask-Gus	1	196	304
FH	2	Trask-Gus	1	202	369
FH	2	Trask-Gus	1	204	159
FH	2	Trask-Gus	1	208	143
FH	2	Trask-Gus	1	209	1202
FH	3	Trask-Gus	1	183	668
FH	3	Trask-Gus	1	183	326
FH	3	Trask-Gus	1	193	0
FH	3	Trask-Gus	1	195	363
FH	3	Trask-Gus	1	195	2185
FH	3	Trask-Gus	1	195	131
FH	3	Trask-Gus	1	201	0
FH	3	Trask-Gus	1	201	681
FH	3	Trask-Gus	1	206	149
FH	3	Trask-Gus	1	211	397
FH	4	Trask-Gus	1	183	337
FH	4	Trask-Gus	1	186	0
FH	4	Trask-Gus	1	190	0
FH	4	Trask-Gus	1	196	128
FH	4	Trask-Gus	1	196	8
FH	4	Trask-Gus	1	197	406
FH	4	Trask-Gus	1	199	698
FH	4	Trask-Gus	1	202	672
FH	4	Trask-Gus	1	202	424
FH	4	Trask-Gus	1	208	438
FH	4	Trask-Gus	1	211	148
FH	5	Trask-Gus	1	125	0
FH	5	Trask-Gus	1	179	4
FH	5	Trask-Gus	1	189	31
FH	5	Trask-Gus	1	191	21
FH	5	Trask-Gus	1	195	376
FH	5	Trask-Gus	1	195	152
FH	5	Trask-Gus	1	196	158
FH	5	Trask-Gus	1	196	131
FH	5	Trask-Gus	1	196	160
FH	5	Trask-Gus	1	197	233
FH	5	Trask-Gus	1	199	155
FH	5	Trask-Gus	1	203	662
FH	5	Trask-Gus	1	206	402
FH	5	Trask-Gus	1	208	168
FH	1	Trask-Pothole	1	188	125
FH	2	Trask-Pothole	1	208	156
FH	3	Trask-Pothole	1	208	364
FH	4	Trask-Pothole	1	180	88
FH	4	Trask-Pothole	1	192	130
FH	4	Trask-Pothole	1	194	134
FH	4	Trask-Pothole	1	196	141
FH	4	Trask-Pothole	1	210	140
FH	5	Trask-Pothole	1	179	106
FH	5	Trask-Pothole	1	179	93
FH	5	Trask-Pothole	1	180	309
FH	5	Trask-Pothole	1	192	163
FH	5	Trask-Pothole	1	193	75
FH	5	Trask-Pothole	1	194	6
FH	5	Trask-Pothole	1	195	132
FH	5	Trask-Pothole	1	202	106
FH	5	Trask-Pothole	1	211	138
FH	5	Trask-Pothole	1	212	578
FH	1	Trask-Rock	1	203	283
FH	1	Trask-Rock	1	203	143
FH	1	Trask-Rock	1	206	146
FH	1	Trask-Rock	1	206	109
FH	2	Trask-Rock	1	187	338
FH	2	Trask-Rock	1	197	139
FH	2	Trask-Rock	1	197	241
FH	2	Trask-Rock	1	210	389
FH	3	Trask-Rock	1	185	138
FH	3	Trask-Rock	1	187	216
FH	3	Trask-Rock	1	187	90
FH	3	Trask-Rock	1	196	120
FH	3	Trask-Rock	1	197	106
FH	3	Trask-Rock	1	200	113
FH	3	Trask-Rock	1	207	313
FH	4	Trask-Rock	1	187	19
FH	4	Trask-Rock	1	187	139
FH	4	Trask-Rock	1	197	149
FH	4	Trask-Rock	1	206	84
FH	5	Trask-Rock	1	193	87
FH	5	Trask-Rock	1	208	154
FH	5	Trask-Rock	1	209	583
FH+CC	1	Trask-Gus	1	189	319
FH+CC	1	Trask-Gus	1	190	2167
FH+CC	1	Trask-Gus	1	195	9
FH+CC	1	Trask-Gus	1	196	327
FH+CC	1	Trask-Gus	1	196	544
FH+CC	1	Trask-Gus	1	199	4
FH+CC	1	Trask-Gus	1	208	551
FH+CC	1	Trask-Gus	1	208	1123
FH+CC	1	Trask-Gus	1	209	123
FH+CC	1	Trask-Gus	1	209	155
FH+CC	2	Trask-Gus	1	185	0
FH+CC	2	Trask-Gus	1	189	473
FH+CC	2	Trask-Gus	1	189	362
FH+CC	2	Trask-Gus	1	189	740
FH+CC	2	Trask-Gus	1	189	135
FH+CC	2	Trask-Gus	1	190	702
FH+CC	2	Trask-Gus	1	195	145
FH+CC	2	Trask-Gus	1	196	150
FH+CC	2	Trask-Gus	1	197	0
FH+CC	2	Trask-Gus	1	197	150
FH+CC	2	Trask-Gus	1	198	1
FH+CC	2	Trask-Gus	1	199	395
FH+CC	2	Trask-Gus	1	204	499
FH+CC	3	Trask-Gus	1	183	902
FH+CC	3	Trask-Gus	1	189	140
FH+CC	3	Trask-Gus	1	196	0
FH+CC	3	Trask-Gus	1	196	181
FH+CC	3	Trask-Gus	1	204	149
FH+CC	3	Trask-Gus	1	207	441
FH+CC	3	Trask-Gus	1	207	210
FH+CC	3	Trask-Gus	1	211	214
FH+CC	4	Trask-Gus	1	189	124
FH+CC	4	Trask-Gus	1	189	167
FH+CC	4	Trask-Gus	1	189	164
FH+CC	4	Trask-Gus	1	189	129
FH+CC	4	Trask-Gus	1	191	169
FH+CC	4	Trask-Gus	1	195	166
FH+CC	4	Trask-Gus	1	195	165
FH+CC	4	Trask-Gus	1	196	202
FH+CC	4	Trask-Gus	1	196	35
FH+CC	4	Trask-Gus	1	199	2
FH+CC	4	Trask-Gus	1	201	160
FH+CC	4	Trask-Gus	1	203	339
FH+CC	4	Trask-Gus	1	206	171
FH+CC	4	Trask-Gus	1	208	242
FH+CC	4	Trask-Gus	1	209	233
FH+CC	4	Trask-Gus	1	209	364
FH+CC	4	Trask-Gus	1	211	238
FH+CC	5	Trask-Gus	1	182	4
FH+CC	5	Trask-Gus	1	189	1115
FH+CC	5	Trask-Gus	1	190	132
FH+CC	5	Trask-Gus	1	195	367
FH+CC	5	Trask-Gus	1	195	159
FH+CC	5	Trask-Gus	1	196	190
FH+CC	5	Trask-Gus	1	197	72
FH+CC	5	Trask-Gus	1	203	388
FH+CC	5	Trask-Gus	1	204	172
FH+CC	5	Trask-Gus	1	205	230
FH+CC	5	Trask-Gus	1	206	163
FH+CC	5	Trask-Gus	1	207	186
FH+CC	5	Trask-Gus	1	208	182
FH+CC	5	Trask-Gus	1	209	152
FH+CC	1	Trask-Pothole	1	188	125
FH+CC	2	Trask-Pothole	1	208	156
FH+CC	3	Trask-Pothole	1	208	364
FH+CC	4	Trask-Pothole	1	180	88
FH+CC	4	Trask-Pothole	1	192	130
FH+CC	4	Trask-Pothole	1	194	134
FH+CC	4	Trask-Pothole	1	196	141
FH+CC	4	Trask-Pothole	1	210	140
FH+CC	5	Trask-Pothole	1	179	106
FH+CC	5	Trask-Pothole	1	179	93
FH+CC	5	Trask-Pothole	1	180	309
FH+CC	5	Trask-Pothole	1	192	163
FH+CC	5	Trask-Pothole	1	193	75
FH+CC	5	Trask-Pothole	1	194	6
FH+CC	5	Trask-Pothole	1	195	132
FH+CC	5	Trask-Pothole	1	202	106
FH+CC	5	Trask-Pothole	1	211	138
FH+CC	5	Trask-Pothole	1	212	578
FH+CC	1	Trask-Rock	1	203	283
FH+CC	1	Trask-Rock	1	203	143
FH+CC	1	Trask-Rock	1	206	146
FH+CC	1	Trask-Rock	1	206	109
FH+CC	2	Trask-Rock	1	187	338
FH+CC	2	Trask-Rock	1	197	139
FH+CC	2	Trask-Rock	1	197	241
FH+CC	2	Trask-Rock	1	210	389
FH+CC	3	Trask-Rock	1	185	138
FH+CC	3	Trask-Rock	1	187	216
FH+CC	3	Trask-Rock	1	187	90
FH+CC	3	Trask-Rock	1	196	120
FH+CC	3	Trask-Rock	1	197	106
FH+CC	3	Trask-Rock	1	200	113
FH+CC	3	Trask-Rock	1	207	313
FH+CC	4	Trask-Rock	1	187	19
FH+CC	4	Trask-Rock	1	187	139
FH+CC	4	Trask-Rock	1	197	149
FH+CC	4	Trask-Rock	1	206	84
FH+CC	5	Trask-Rock	1	193	87
FH+CC	5	Trask-Rock	1	208	154
FH+CC	5	Trask-Rock	1	209	583
baseline	1	Trask-Gus	2	185	23
baseline	1	Trask-Gus	2	186	25
baseline	1	Trask-Gus	2	187	1178
baseline	1	Trask-Gus	2	191	23
baseline	1	Trask-Gus	2	193	178
baseline	1	Trask-Gus	2	194	195
baseline	1	Trask-Gus	2	194	20
baseline	1	Trask-Gus	2	199	198
baseline	1	Trask-Gus	2	199	155
baseline	1	Trask-Gus	2	199	33
baseline	1	Trask-Gus	2	200	161
baseline	1	Trask-Gus	2	202	161
baseline	1	Trask-Gus	2	202	416
baseline	1	Trask-Gus	2	202	155
baseline	1	Trask-Gus	2	207	177
baseline	1	Trask-Gus	2	208	315
baseline	1	Trask-Gus	2	208	189
baseline	1	Trask-Gus	2	210	186
baseline	1	Trask-Gus	2	210	249
baseline	2	Trask-Gus	2	187	445
baseline	2	Trask-Gus	2	187	519
baseline	2	Trask-Gus	2	193	120
baseline	2	Trask-Gus	2	197	538
baseline	2	Trask-Gus	2	197	121
baseline	2	Trask-Gus	2	197	416
baseline	2	Trask-Gus	2	199	125
baseline	2	Trask-Gus	2	201	578
baseline	3	Trask-Gus	2	187	335
baseline	3	Trask-Gus	2	192	411
baseline	3	Trask-Gus	2	193	514
baseline	3	Trask-Gus	2	198	437
baseline	3	Trask-Gus	2	199	247
baseline	3	Trask-Gus	2	205	134
baseline	3	Trask-Gus	2	210	523
baseline	3	Trask-Gus	2	212	558
baseline	4	Trask-Gus	2	186	33
baseline	4	Trask-Gus	2	187	17
baseline	4	Trask-Gus	2	187	116
baseline	4	Trask-Gus	2	190	377
baseline	4	Trask-Gus	2	190	146
baseline	4	Trask-Gus	2	191	15
baseline	4	Trask-Gus	2	192	413
baseline	4	Trask-Gus	2	192	128
baseline	4	Trask-Gus	2	193	99
baseline	4	Trask-Gus	2	193	162
baseline	4	Trask-Gus	2	199	132
baseline	4	Trask-Gus	2	201	140
baseline	4	Trask-Gus	2	205	164
baseline	4	Trask-Gus	2	206	50
baseline	4	Trask-Gus	2	208	701
baseline	4	Trask-Gus	2	209	412
baseline	5	Trask-Gus	2	187	24
baseline	5	Trask-Gus	2	190	129
baseline	5	Trask-Gus	2	197	157
baseline	5	Trask-Gus	2	200	9
baseline	5	Trask-Gus	2	200	137
baseline	5	Trask-Gus	2	204	179
baseline	1	Trask-Pothole	2	173	94
baseline	1	Trask-Pothole	2	175	159
baseline	1	Trask-Pothole	2	178	464
baseline	2	Trask-Pothole	2	179	104
baseline	2	Trask-Pothole	2	182	2
baseline	2	Trask-Pothole	2	184	136
baseline	2	Trask-Pothole	2	191	80
baseline	2	Trask-Pothole	2	192	110
baseline	2	Trask-Pothole	2	194	177
baseline	2	Trask-Pothole	2	212	762
baseline	3	Trask-Pothole	2	176	137
baseline	3	Trask-Pothole	2	176	113
baseline	3	Trask-Pothole	2	176	110
baseline	3	Trask-Pothole	2	181	103
baseline	3	Trask-Pothole	2	189	105
baseline	3	Trask-Pothole	2	196	160
baseline	3	Trask-Pothole	2	196	151
baseline	3	Trask-Pothole	2	205	150
baseline	4	Trask-Pothole	2	174	148
baseline	4	Trask-Pothole	2	179	88
baseline	4	Trask-Pothole	2	187	239
baseline	4	Trask-Pothole	2	208	158
baseline	5	Trask-Pothole	2	175	28
baseline	5	Trask-Pothole	2	175	23
baseline	5	Trask-Pothole	2	179	6
baseline	5	Trask-Pothole	2	181	73
baseline	5	Trask-Pothole	2	181	97
baseline	5	Trask-Pothole	2	192	119
baseline	5	Trask-Pothole	2	196	147
baseline	5	Trask-Pothole	2	200	144
baseline	1	Trask-Rock	2	182	3
baseline	1	Trask-Rock	2	187	149
baseline	1	Trask-Rock	2	187	115
baseline	1	Trask-Rock	2	195	127
baseline	1	Trask-Rock	2	202	151
baseline	1	Trask-Rock	2	211	345
baseline	2	Trask-Rock	2	176	43
baseline	2	Trask-Rock	2	176	2
baseline	2	Trask-Rock	2	177	25
baseline	2	Trask-Rock	2	178	36
baseline	2	Trask-Rock	2	181	68
baseline	2	Trask-Rock	2	182	1
baseline	2	Trask-Rock	2	187	114
baseline	2	Trask-Rock	2	187	74
baseline	2	Trask-Rock	2	189	40
baseline	2	Trask-Rock	2	191	1
baseline	2	Trask-Rock	2	191	138
baseline	2	Trask-Rock	2	193	163
baseline	2	Trask-Rock	2	193	131
baseline	2	Trask-Rock	2	196	133
baseline	3	Trask-Rock	2	174	0
baseline	3	Trask-Rock	2	178	4
baseline	3	Trask-Rock	2	181	81
baseline	3	Trask-Rock	2	182	0
baseline	3	Trask-Rock	2	182	39
baseline	3	Trask-Rock	2	183	385
baseline	3	Trask-Rock	2	183	2
baseline	3	Trask-Rock	2	187	71
baseline	3	Trask-Rock	2	187	90
baseline	3	Trask-Rock	2	188	288
baseline	3	Trask-Rock	2	188	125
baseline	3	Trask-Rock	2	188	69
baseline	3	Trask-Rock	2	189	1
baseline	3	Trask-Rock	2	190	0
baseline	3	Trask-Rock	2	190	129
baseline	3	Trask-Rock	2	193	87
baseline	3	Trask-Rock	2	193	133
baseline	3	Trask-Rock	2	196	129
baseline	3	Trask-Rock	2	198	145
baseline	4	Trask-Rock	2	176	143
baseline	4	Trask-Rock	2	181	135
baseline	4	Trask-Rock	2	181	131
baseline	4	Trask-Rock	2	182	38
baseline	4	Trask-Rock	2	188	4
baseline	4	Trask-Rock	2	189	159
baseline	4	Trask-Rock	2	196	139
baseline	4	Trask-Rock	2	196	107
baseline	4	Trask-Rock	2	197	182
baseline	4	Trask-Rock	2	198	338
baseline	5	Trask-Rock	2	170	0
baseline	5	Trask-Rock	2	175	106
baseline	5	Trask-Rock	2	176	9
baseline	5	Trask-Rock	2	176	19
baseline	5	Trask-Rock	2	177	2
baseline	5	Trask-Rock	2	187	161
baseline	5	Trask-Rock	2	187	1
baseline	5	Trask-Rock	2	187	91
baseline	5	Trask-Rock	2	190	34
baseline	5	Trask-Rock	2	191	2
baseline	5	Trask-Rock	2	191	1
baseline	5	Trask-Rock	2	192	8
baseline	5	Trask-Rock	2	193	130
baseline	5	Trask-Rock	2	193	20
baseline	5	Trask-Rock	2	195	125
baseline	5	Trask-Rock	2	195	98
baseline	5	Trask-Rock	2	195	90
baseline	5	Trask-Rock	2	205	183
baseline	2	Trask-UM	2	186	99
baseline	3	Trask-UM	2	186	94
baseline	4	Trask-UM	2	186	93
baseline	5	Trask-UM	2	186	100
baseline	5	Trask-UM	2	186	90
CC	1	Trask-Gus	2	187	31
CC	1	Trask-Gus	2	187	148
CC	1	Trask-Gus	2	190	148
CC	1	Trask-Gus	2	191	160
CC	1	Trask-Gus	2	194	171
CC	1	Trask-Gus	2	194	36
CC	1	Trask-Gus	2	197	20
CC	1	Trask-Gus	2	197	553
CC	1	Trask-Gus	2	199	186
CC	1	Trask-Gus	2	200	183
CC	1	Trask-Gus	2	200	178
CC	1	Trask-Gus	2	201	184
CC	1	Trask-Gus	2	203	1404
CC	1	Trask-Gus	2	203	546
CC	1	Trask-Gus	2	204	200
CC	1	Trask-Gus	2	208	187
CC	1	Trask-Gus	2	210	217
CC	1	Trask-Gus	2	211	221
CC	2	Trask-Gus	2	192	162
CC	2	Trask-Gus	2	193	566
CC	2	Trask-Gus	2	193	157
CC	2	Trask-Gus	2	193	67
CC	2	Trask-Gus	2	199	1151
CC	2	Trask-Gus	2	202	200
CC	2	Trask-Gus	2	204	548
CC	2	Trask-Gus	2	205	566
CC	2	Trask-Gus	2	206	203
CC	2	Trask-Gus	2	206	189
CC	3	Trask-Gus	2	197	152
CC	3	Trask-Gus	2	199	421
CC	3	Trask-Gus	2	199	156
CC	3	Trask-Gus	2	200	659
CC	3	Trask-Gus	2	202	149
CC	4	Trask-Gus	2	190	25
CC	4	Trask-Gus	2	191	160
CC	4	Trask-Gus	2	197	67
CC	4	Trask-Gus	2	199	165
CC	4	Trask-Gus	2	200	122
CC	4	Trask-Gus	2	202	186
CC	4	Trask-Gus	2	206	220
CC	4	Trask-Gus	2	206	194
CC	5	Trask-Gus	2	187	146
CC	5	Trask-Gus	2	187	102
CC	5	Trask-Gus	2	187	32
CC	5	Trask-Gus	2	193	165
CC	5	Trask-Gus	2	197	154
CC	5	Trask-Gus	2	199	178
CC	5	Trask-Gus	2	200	167
CC	5	Trask-Gus	2	205	184
CC	1	Trask-Pothole	2	173	94
CC	1	Trask-Pothole	2	175	159
CC	1	Trask-Pothole	2	178	464
CC	2	Trask-Pothole	2	179	104
CC	2	Trask-Pothole	2	182	2
CC	2	Trask-Pothole	2	184	136
CC	2	Trask-Pothole	2	191	80
CC	2	Trask-Pothole	2	192	110
CC	2	Trask-Pothole	2	194	177
CC	2	Trask-Pothole	2	212	762
CC	3	Trask-Pothole	2	176	137
CC	3	Trask-Pothole	2	176	113
CC	3	Trask-Pothole	2	176	110
CC	3	Trask-Pothole	2	181	103
CC	3	Trask-Pothole	2	189	105
CC	3	Trask-Pothole	2	196	160
CC	3	Trask-Pothole	2	196	151
CC	3	Trask-Pothole	2	205	150
CC	4	Trask-Pothole	2	174	148
CC	4	Trask-Pothole	2	179	88
CC	4	Trask-Pothole	2	187	239
CC	4	Trask-Pothole	2	208	158
CC	5	Trask-Pothole	2	175	28
CC	5	Trask-Pothole	2	175	23
CC	5	Trask-Pothole	2	179	6
CC	5	Trask-Pothole	2	181	73
CC	5	Trask-Pothole	2	181	97
CC	5	Trask-Pothole	2	192	119
CC	5	Trask-Pothole	2	196	147
CC	5	Trask-Pothole	2	200	144
CC	1	Trask-Rock	2	182	3
CC	1	Trask-Rock	2	187	149
CC	1	Trask-Rock	2	187	115
CC	1	Trask-Rock	2	195	127
CC	1	Trask-Rock	2	202	151
CC	1	Trask-Rock	2	211	345
CC	2	Trask-Rock	2	176	43
CC	2	Trask-Rock	2	176	2
CC	2	Trask-Rock	2	177	25
CC	2	Trask-Rock	2	178	36
CC	2	Trask-Rock	2	181	68
CC	2	Trask-Rock	2	182	1
CC	2	Trask-Rock	2	187	114
CC	2	Trask-Rock	2	187	74
CC	2	Trask-Rock	2	189	40
CC	2	Trask-Rock	2	191	1
CC	2	Trask-Rock	2	191	138
CC	2	Trask-Rock	2	193	163
CC	2	Trask-Rock	2	193	131
CC	2	Trask-Rock	2	196	133
CC	3	Trask-Rock	2	174	0
CC	3	Trask-Rock	2	178	4
CC	3	Trask-Rock	2	181	81
CC	3	Trask-Rock	2	182	0
CC	3	Trask-Rock	2	182	39
CC	3	Trask-Rock	2	183	385
CC	3	Trask-Rock	2	183	2
CC	3	Trask-Rock	2	187	71
CC	3	Trask-Rock	2	187	90
CC	3	Trask-Rock	2	188	288
CC	3	Trask-Rock	2	188	125
CC	3	Trask-Rock	2	188	69
CC	3	Trask-Rock	2	189	1
CC	3	Trask-Rock	2	190	0
CC	3	Trask-Rock	2	190	129
CC	3	Trask-Rock	2	193	87
CC	3	Trask-Rock	2	193	133
CC	3	Trask-Rock	2	196	129
CC	3	Trask-Rock	2	198	145
CC	4	Trask-Rock	2	176	143
CC	4	Trask-Rock	2	181	135
CC	4	Trask-Rock	2	181	131
CC	4	Trask-Rock	2	182	38
CC	4	Trask-Rock	2	188	4
CC	4	Trask-Rock	2	189	159
CC	4	Trask-Rock	2	196	139
CC	4	Trask-Rock	2	196	107
CC	4	Trask-Rock	2	197	182
CC	4	Trask-Rock	2	198	338
CC	5	Trask-Rock	2	170	0
CC	5	Trask-Rock	2	175	106
CC	5	Trask-Rock	2	176	9
CC	5	Trask-Rock	2	176	19
CC	5	Trask-Rock	2	177	2
CC	5	Trask-Rock	2	187	161
CC	5	Trask-Rock	2	187	1
CC	5	Trask-Rock	2	187	91
CC	5	Trask-Rock	2	190	34
CC	5	Trask-Rock	2	191	2
CC	5	Trask-Rock	2	191	1
CC	5	Trask-Rock	2	192	8
CC	5	Trask-Rock	2	193	130
CC	5	Trask-Rock	2	193	20
CC	5	Trask-Rock	2	195	125
CC	5	Trask-Rock	2	195	98
CC	5	Trask-Rock	2	195	90
CC	5	Trask-Rock	2	205	183
CC	2	Trask-UM	2	186	99
CC	3	Trask-UM	2	186	94
CC	4	Trask-UM	2	186	93
CC	5	Trask-UM	2	186	100
CC	5	Trask-UM	2	186	90
FH	1	Trask-Gus	2	190	14
FH	1	Trask-Gus	2	192	469
FH	1	Trask-Gus	2	192	371
FH	1	Trask-Gus	2	194	112
FH	1	Trask-Gus	2	198	117
FH	1	Trask-Gus	2	201	485
FH	1	Trask-Gus	2	202	444
FH	1	Trask-Gus	2	202	1771
FH	1	Trask-Gus	2	212	523
FH	2	Trask-Gus	2	186	17
FH	2	Trask-Gus	2	187	453
FH	2	Trask-Gus	2	187	27
FH	2	Trask-Gus	2	192	58
FH	2	Trask-Gus	2	193	1056
FH	2	Trask-Gus	2	193	147
FH	2	Trask-Gus	2	193	869
FH	2	Trask-Gus	2	193	111
FH	2	Trask-Gus	2	197	489
FH	2	Trask-Gus	2	199	35
FH	2	Trask-Gus	2	200	122
FH	2	Trask-Gus	2	202	173
FH	2	Trask-Gus	2	204	638
FH	2	Trask-Gus	2	204	157
FH	2	Trask-Gus	2	206	153
FH	2	Trask-Gus	2	211	172
FH	3	Trask-Gus	2	187	27
FH	3	Trask-Gus	2	192	39
FH	3	Trask-Gus	2	192	117
FH	3	Trask-Gus	2	197	139
FH	3	Trask-Gus	2	197	124
FH	3	Trask-Gus	2	202	506
FH	3	Trask-Gus	2	202	171
FH	3	Trask-Gus	2	203	955
FH	3	Trask-Gus	2	210	1771
FH	4	Trask-Gus	2	190	409
FH	4	Trask-Gus	2	191	1344
FH	4	Trask-Gus	2	193	123
FH	4	Trask-Gus	2	193	340
FH	4	Trask-Gus	2	194	127
FH	4	Trask-Gus	2	199	504
FH	4	Trask-Gus	2	204	1441
FH	5	Trask-Gus	2	193	127
FH	5	Trask-Gus	2	197	138
FH	5	Trask-Gus	2	200	510
FH	5	Trask-Gus	2	201	504
FH	5	Trask-Gus	2	202	136
FH	5	Trask-Gus	2	202	510
FH	5	Trask-Gus	2	203	1279
FH	5	Trask-Gus	2	203	499
FH	5	Trask-Gus	2	203	437
FH	5	Trask-Gus	2	207	514
FH	1	Trask-Pothole	2	173	94
FH	1	Trask-Pothole	2	175	159
FH	1	Trask-Pothole	2	178	464
FH	2	Trask-Pothole	2	179	104
FH	2	Trask-Pothole	2	182	2
FH	2	Trask-Pothole	2	184	136
FH	2	Trask-Pothole	2	191	80
FH	2	Trask-Pothole	2	192	110
FH	2	Trask-Pothole	2	194	177
FH	2	Trask-Pothole	2	212	762
FH	3	Trask-Pothole	2	176	137
FH	3	Trask-Pothole	2	176	113
FH	3	Trask-Pothole	2	176	110
FH	3	Trask-Pothole	2	181	103
FH	3	Trask-Pothole	2	189	105
FH	3	Trask-Pothole	2	196	160
FH	3	Trask-Pothole	2	196	151
FH	3	Trask-Pothole	2	205	150
FH	4	Trask-Pothole	2	174	148
FH	4	Trask-Pothole	2	179	88
FH	4	Trask-Pothole	2	187	239
FH	4	Trask-Pothole	2	208	158
FH	5	Trask-Pothole	2	175	28
FH	5	Trask-Pothole	2	175	23
FH	5	Trask-Pothole	2	179	6
FH	5	Trask-Pothole	2	181	73
FH	5	Trask-Pothole	2	181	97
FH	5	Trask-Pothole	2	192	119
FH	5	Trask-Pothole	2	196	147
FH	5	Trask-Pothole	2	200	144
FH	1	Trask-Rock	2	182	3
FH	1	Trask-Rock	2	187	149
FH	1	Trask-Rock	2	187	115
FH	1	Trask-Rock	2	195	127
FH	1	Trask-Rock	2	202	151
FH	1	Trask-Rock	2	211	345
FH	2	Trask-Rock	2	176	43
FH	2	Trask-Rock	2	176	2
FH	2	Trask-Rock	2	177	25
FH	2	Trask-Rock	2	178	36
FH	2	Trask-Rock	2	181	68
FH	2	Trask-Rock	2	182	1
FH	2	Trask-Rock	2	187	114
FH	2	Trask-Rock	2	187	74
FH	2	Trask-Rock	2	189	40
FH	2	Trask-Rock	2	191	1
FH	2	Trask-Rock	2	191	138
FH	2	Trask-Rock	2	193	163
FH	2	Trask-Rock	2	193	131
FH	2	Trask-Rock	2	196	133
FH	3	Trask-Rock	2	174	0
FH	3	Trask-Rock	2	178	4
FH	3	Trask-Rock	2	181	81
FH	3	Trask-Rock	2	182	0
FH	3	Trask-Rock	2	182	39
FH	3	Trask-Rock	2	183	385
FH	3	Trask-Rock	2	183	2
FH	3	Trask-Rock	2	187	71
FH	3	Trask-Rock	2	187	90
FH	3	Trask-Rock	2	188	288
FH	3	Trask-Rock	2	188	125
FH	3	Trask-Rock	2	188	69
FH	3	Trask-Rock	2	189	1
FH	3	Trask-Rock	2	190	0
FH	3	Trask-Rock	2	190	129
FH	3	Trask-Rock	2	193	87
FH	3	Trask-Rock	2	193	133
FH	3	Trask-Rock	2	196	129
FH	3	Trask-Rock	2	198	145
FH	4	Trask-Rock	2	176	143
FH	4	Trask-Rock	2	181	135
FH	4	Trask-Rock	2	181	131
FH	4	Trask-Rock	2	182	38
FH	4	Trask-Rock	2	188	4
FH	4	Trask-Rock	2	189	159
FH	4	Trask-Rock	2	196	139
FH	4	Trask-Rock	2	196	107
FH	4	Trask-Rock	2	197	182
FH	4	Trask-Rock	2	198	338
FH	5	Trask-Rock	2	170	0
FH	5	Trask-Rock	2	175	106
FH	5	Trask-Rock	2	176	9
FH	5	Trask-Rock	2	176	19
FH	5	Trask-Rock	2	177	2
FH	5	Trask-Rock	2	187	161
FH	5	Trask-Rock	2	187	1
FH	5	Trask-Rock	2	187	91
FH	5	Trask-Rock	2	190	34
FH	5	Trask-Rock	2	191	2
FH	5	Trask-Rock	2	191	1
FH	5	Trask-Rock	2	192	8
FH	5	Trask-Rock	2	193	130
FH	5	Trask-Rock	2	193	20
FH	5	Trask-Rock	2	195	125
FH	5	Trask-Rock	2	195	98
FH	5	Trask-Rock	2	195	90
FH	5	Trask-Rock	2	205	183
FH	2	Trask-UM	2	186	99
FH	4	Trask-UM	2	186	93
FH+CC	1	Trask-Gus	2	187	374
FH+CC	1	Trask-Gus	2	187	152
FH+CC	1	Trask-Gus	2	187	147
FH+CC	1	Trask-Gus	2	197	79
FH+CC	1	Trask-Gus	2	200	182
FH+CC	1	Trask-Gus	2	201	195
FH+CC	1	Trask-Gus	2	205	113
FH+CC	2	Trask-Gus	2	187	166
FH+CC	2	Trask-Gus	2	190	2158
FH+CC	2	Trask-Gus	2	190	181
FH+CC	2	Trask-Gus	2	192	183
FH+CC	2	Trask-Gus	2	192	47
FH+CC	2	Trask-Gus	2	193	26
FH+CC	2	Trask-Gus	2	194	2
FH+CC	2	Trask-Gus	2	197	72
FH+CC	2	Trask-Gus	2	197	172
FH+CC	2	Trask-Gus	2	198	434
FH+CC	2	Trask-Gus	2	198	182
FH+CC	2	Trask-Gus	2	199	165
FH+CC	2	Trask-Gus	2	201	107
FH+CC	2	Trask-Gus	2	201	197
FH+CC	2	Trask-Gus	2	201	201
FH+CC	2	Trask-Gus	2	202	194
FH+CC	2	Trask-Gus	2	202	183
FH+CC	2	Trask-Gus	2	202	186
FH+CC	2	Trask-Gus	2	203	170
FH+CC	2	Trask-Gus	2	204	150
FH+CC	2	Trask-Gus	2	204	1042
FH+CC	2	Trask-Gus	2	204	214
FH+CC	2	Trask-Gus	2	205	1220
FH+CC	2	Trask-Gus	2	206	201
FH+CC	2	Trask-Gus	2	207	220
FH+CC	2	Trask-Gus	2	210	207
FH+CC	2	Trask-Gus	2	210	204
FH+CC	3	Trask-Gus	2	187	527
FH+CC	3	Trask-Gus	2	187	45
FH+CC	3	Trask-Gus	2	192	112
FH+CC	3	Trask-Gus	2	197	910
FH+CC	3	Trask-Gus	2	197	567
FH+CC	3	Trask-Gus	2	197	143
FH+CC	3	Trask-Gus	2	197	132
FH+CC	3	Trask-Gus	2	198	365
FH+CC	3	Trask-Gus	2	199	2191
FH+CC	3	Trask-Gus	2	200	182
FH+CC	3	Trask-Gus	2	202	134
FH+CC	3	Trask-Gus	2	205	569
FH+CC	4	Trask-Gus	2	191	25
FH+CC	4	Trask-Gus	2	191	25
FH+CC	4	Trask-Gus	2	193	578
FH+CC	4	Trask-Gus	2	193	492
FH+CC	4	Trask-Gus	2	193	134
FH+CC	4	Trask-Gus	2	199	486
FH+CC	4	Trask-Gus	2	200	152
FH+CC	4	Trask-Gus	2	204	164
FH+CC	4	Trask-Gus	2	206	122
FH+CC	4	Trask-Gus	2	208	171
FH+CC	5	Trask-Gus	2	190	429
FH+CC	5	Trask-Gus	2	191	656
FH+CC	5	Trask-Gus	2	194	445
FH+CC	5	Trask-Gus	2	205	662
FH+CC	5	Trask-Gus	2	210	162
FH+CC	1	Trask-Pothole	2	173	94
FH+CC	1	Trask-Pothole	2	175	159
FH+CC	1	Trask-Pothole	2	178	464
FH+CC	2	Trask-Pothole	2	179	104
FH+CC	2	Trask-Pothole	2	182	2
FH+CC	2	Trask-Pothole	2	184	136
FH+CC	2	Trask-Pothole	2	191	80
FH+CC	2	Trask-Pothole	2	192	110
FH+CC	2	Trask-Pothole	2	194	177
FH+CC	2	Trask-Pothole	2	212	762
FH+CC	3	Trask-Pothole	2	176	137
FH+CC	3	Trask-Pothole	2	176	113
FH+CC	3	Trask-Pothole	2	176	110
FH+CC	3	Trask-Pothole	2	181	103
FH+CC	3	Trask-Pothole	2	189	105
FH+CC	3	Trask-Pothole	2	196	160
FH+CC	3	Trask-Pothole	2	196	151
FH+CC	3	Trask-Pothole	2	205	150
FH+CC	4	Trask-Pothole	2	174	148
FH+CC	4	Trask-Pothole	2	179	88
FH+CC	4	Trask-Pothole	2	187	239
FH+CC	4	Trask-Pothole	2	208	158
FH+CC	5	Trask-Pothole	2	175	28
FH+CC	5	Trask-Pothole	2	175	23
FH+CC	5	Trask-Pothole	2	179	6
FH+CC	5	Trask-Pothole	2	181	73
FH+CC	5	Trask-Pothole	2	181	97
FH+CC	5	Trask-Pothole	2	192	119
FH+CC	5	Trask-Pothole	2	196	147
FH+CC	5	Trask-Pothole	2	200	144
FH+CC	1	Trask-Rock	2	182	3
FH+CC	1	Trask-Rock	2	187	149
FH+CC	1	Trask-Rock	2	187	115
FH+CC	1	Trask-Rock	2	195	127
FH+CC	1	Trask-Rock	2	202	151
FH+CC	1	Trask-Rock	2	211	345
FH+CC	2	Trask-Rock	2	176	43
FH+CC	2	Trask-Rock	2	176	2
FH+CC	2	Trask-Rock	2	177	25
FH+CC	2	Trask-Rock	2	178	36
FH+CC	2	Trask-Rock	2	181	68
FH+CC	2	Trask-Rock	2	182	1
FH+CC	2	Trask-Rock	2	187	114
FH+CC	2	Trask-Rock	2	187	74
FH+CC	2	Trask-Rock	2	189	40
FH+CC	2	Trask-Rock	2	191	1
FH+CC	2	Trask-Rock	2	191	138
FH+CC	2	Trask-Rock	2	193	163
FH+CC	2	Trask-Rock	2	193	131
FH+CC	2	Trask-Rock	2	196	133
FH+CC	3	Trask-Rock	2	174	0
FH+CC	3	Trask-Rock	2	178	4
FH+CC	3	Trask-Rock	2	181	81
FH+CC	3	Trask-Rock	2	182	0
FH+CC	3	Trask-Rock	2	182	39
FH+CC	3	Trask-Rock	2	183	385
FH+CC	3	Trask-Rock	2	183	2
FH+CC	3	Trask-Rock	2	187	71
FH+CC	3	Trask-Rock	2	187	90
FH+CC	3	Trask-Rock	2	188	288
FH+CC	3	Trask-Rock	2	188	125
FH+CC	3	Trask-Rock	2	188	69
FH+CC	3	Trask-Rock	2	189	1
FH+CC	3	Trask-Rock	2	190	0
FH+CC	3	Trask-Rock	2	190	129
FH+CC	3	Trask-Rock	2	193	87
FH+CC	3	Trask-Rock	2	193	133
FH+CC	3	Trask-Rock	2	196	129
FH+CC	3	Trask-Rock	2	198	145
FH+CC	4	Trask-Rock	2	176	143
FH+CC	4	Trask-Rock	2	181	135
FH+CC	4	Trask-Rock	2	181	131
FH+CC	4	Trask-Rock	2	182	38
FH+CC	4	Trask-Rock	2	188	4
FH+CC	4	Trask-Rock	2	189	159
FH+CC	4	Trask-Rock	2	196	139
FH+CC	4	Trask-Rock	2	196	107
FH+CC	4	Trask-Rock	2	197	182
FH+CC	4	Trask-Rock	2	198	338
FH+CC	5	Trask-Rock	2	170	0
FH+CC	5	Trask-Rock	2	175	106
FH+CC	5	Trask-Rock	2	176	9
FH+CC	5	Trask-Rock	2	176	19
FH+CC	5	Trask-Rock	2	177	2
FH+CC	5	Trask-Rock	2	187	161
FH+CC	5	Trask-Rock	2	187	1
FH+CC	5	Trask-Rock	2	187	91
FH+CC	5	Trask-Rock	2	190	34
FH+CC	5	Trask-Rock	2	191	2
FH+CC	5	Trask-Rock	2	191	1
FH+CC	5	Trask-Rock	2	192	8
FH+CC	5	Trask-Rock	2	193	130
FH+CC	5	Trask-Rock	2	193	20
FH+CC	5	Trask-Rock	2	195	125
FH+CC	5	Trask-Rock	2	195	98
FH+CC	5	Trask-Rock	2	195	90
FH+CC	5	Trask-Rock	2	205	183
FH+CC	2	Trask-UM	2	186	99
FH+CC	3	Trask-UM	2	186	94
FH+CC	5	Trask-UM	2	186	93
baseline	1	Trask-Gus	3	209	197
baseline	1	Trask-Gus	3	210	192
baseline	1	Trask-Gus	3	211	915
baseline	1	Trask-Gus	3	211	166
baseline	1	Trask-Gus	3	216	136
baseline	1	Trask-Gus	3	216	653
baseline	1	Trask-Gus	3	216	152
baseline	2	Trask-Gus	3	209	219
baseline	2	Trask-Gus	3	209	103
baseline	2	Trask-Gus	3	210	80
baseline	2	Trask-Gus	3	210	119
baseline	2	Trask-Gus	3	210	213
baseline	2	Trask-Gus	3	211	260
baseline	2	Trask-Gus	3	211	235
baseline	2	Trask-Gus	3	213	215
baseline	2	Trask-Gus	3	215	241
baseline	2	Trask-Gus	3	215	226
baseline	2	Trask-Gus	3	216	1150
baseline	2	Trask-Gus	3	216	434
baseline	2	Trask-Gus	3	216	132
baseline	2	Trask-Gus	3	216	169
baseline	2	Trask-Gus	3	217	249
baseline	2	Trask-Gus	3	217	208
baseline	2	Trask-Gus	3	218	178
baseline	2	Trask-Gus	3	219	260
baseline	2	Trask-Gus	3	220	220
baseline	3	Trask-Gus	3	209	212
baseline	3	Trask-Gus	3	210	218
baseline	3	Trask-Gus	3	210	207
baseline	3	Trask-Gus	3	212	217
baseline	3	Trask-Gus	3	212	112
baseline	3	Trask-Gus	3	213	217
baseline	3	Trask-Gus	3	217	239
baseline	3	Trask-Gus	3	219	237
baseline	3	Trask-Gus	3	220	237
baseline	3	Trask-Gus	3	220	237
baseline	3	Trask-Gus	3	220	190
baseline	3	Trask-Gus	3	220	110
baseline	4	Trask-Gus	3	150	0
baseline	4	Trask-Gus	3	204	110
baseline	4	Trask-Gus	3	210	285
baseline	4	Trask-Gus	3	210	11
baseline	4	Trask-Gus	3	210	190
baseline	4	Trask-Gus	3	211	82
baseline	4	Trask-Gus	3	211	208
baseline	4	Trask-Gus	3	211	186
baseline	4	Trask-Gus	3	211	46
baseline	4	Trask-Gus	3	211	1555
baseline	4	Trask-Gus	3	211	205
baseline	4	Trask-Gus	3	213	268
baseline	4	Trask-Gus	3	213	265
baseline	4	Trask-Gus	3	213	195
baseline	4	Trask-Gus	3	215	140
baseline	4	Trask-Gus	3	216	191
baseline	4	Trask-Gus	3	216	284
baseline	4	Trask-Gus	3	216	192
baseline	4	Trask-Gus	3	217	287
baseline	4	Trask-Gus	3	217	267
baseline	4	Trask-Gus	3	219	259
baseline	4	Trask-Gus	3	219	250
baseline	5	Trask-Gus	3	209	518
baseline	5	Trask-Gus	3	209	106
baseline	5	Trask-Gus	3	209	198
baseline	5	Trask-Gus	3	210	178
baseline	5	Trask-Gus	3	211	748
baseline	5	Trask-Gus	3	217	191
baseline	1	Trask-Pothole	3	201	92
baseline	1	Trask-Pothole	3	203	171
baseline	1	Trask-Pothole	3	204	81
baseline	1	Trask-Pothole	3	205	124
baseline	1	Trask-Pothole	3	208	95
baseline	1	Trask-Pothole	3	210	86
baseline	1	Trask-Pothole	3	210	144
baseline	1	Trask-Pothole	3	212	122
baseline	1	Trask-Pothole	3	214	114
baseline	1	Trask-Pothole	3	215	190
baseline	2	Trask-Pothole	3	205	237
baseline	2	Trask-Pothole	3	205	166
baseline	2	Trask-Pothole	3	205	41
baseline	2	Trask-Pothole	3	208	141
baseline	2	Trask-Pothole	3	210	107
baseline	2	Trask-Pothole	3	212	112
baseline	3	Trask-Pothole	3	201	97
baseline	3	Trask-Pothole	3	203	99
baseline	3	Trask-Pothole	3	205	4
baseline	3	Trask-Pothole	3	208	149
baseline	3	Trask-Pothole	3	212	126
baseline	3	Trask-Pothole	3	215	121
baseline	4	Trask-Pothole	3	201	108
baseline	4	Trask-Pothole	3	203	60
baseline	4	Trask-Pothole	3	204	23
baseline	4	Trask-Pothole	3	207	47
baseline	4	Trask-Pothole	3	211	71
baseline	4	Trask-Pothole	3	211	126
baseline	4	Trask-Pothole	3	211	126
baseline	4	Trask-Pothole	3	212	186
baseline	4	Trask-Pothole	3	215	113
baseline	4	Trask-Pothole	3	217	313
baseline	4	Trask-Pothole	3	220	142
baseline	5	Trask-Pothole	3	206	147
baseline	5	Trask-Pothole	3	207	36
baseline	5	Trask-Pothole	3	211	92
baseline	5	Trask-Pothole	3	215	117
baseline	5	Trask-Pothole	3	215	99
baseline	5	Trask-Pothole	3	219	120
baseline	1	Trask-Rock	3	190	106
baseline	1	Trask-Rock	3	190	133
baseline	1	Trask-Rock	3	190	6
baseline	1	Trask-Rock	3	190	12
baseline	1	Trask-Rock	3	197	170
baseline	1	Trask-Rock	3	197	97
baseline	1	Trask-Rock	3	197	128
baseline	1	Trask-Rock	3	199	168
baseline	1	Trask-Rock	3	200	123
baseline	1	Trask-Rock	3	200	117
baseline	1	Trask-Rock	3	200	113
baseline	1	Trask-Rock	3	200	152
baseline	1	Trask-Rock	3	201	42
baseline	1	Trask-Rock	3	201	275
baseline	1	Trask-Rock	3	201	25
baseline	1	Trask-Rock	3	201	17
baseline	1	Trask-Rock	3	201	110
baseline	1	Trask-Rock	3	203	108
baseline	1	Trask-Rock	3	205	162
baseline	1	Trask-Rock	3	205	130
baseline	1	Trask-Rock	3	208	133
baseline	1	Trask-Rock	3	209	148
baseline	1	Trask-Rock	3	212	148
baseline	1	Trask-Rock	3	212	59
baseline	1	Trask-Rock	3	212	125
baseline	1	Trask-Rock	3	218	452
baseline	2	Trask-Rock	3	138	0
baseline	2	Trask-Rock	3	190	155
baseline	2	Trask-Rock	3	197	155
baseline	2	Trask-Rock	3	197	183
baseline	2	Trask-Rock	3	197	179
baseline	2	Trask-Rock	3	197	129
baseline	2	Trask-Rock	3	200	186
baseline	2	Trask-Rock	3	200	176
baseline	2	Trask-Rock	3	200	49
baseline	2	Trask-Rock	3	203	162
baseline	2	Trask-Rock	3	203	123
baseline	2	Trask-Rock	3	205	130
baseline	2	Trask-Rock	3	205	134
baseline	2	Trask-Rock	3	206	93
baseline	2	Trask-Rock	3	206	189
baseline	2	Trask-Rock	3	208	138
baseline	2	Trask-Rock	3	209	186
baseline	2	Trask-Rock	3	211	143
baseline	3	Trask-Rock	3	197	166
baseline	3	Trask-Rock	3	197	98
baseline	3	Trask-Rock	3	197	114
baseline	3	Trask-Rock	3	199	186
baseline	3	Trask-Rock	3	200	162
baseline	3	Trask-Rock	3	205	122
baseline	3	Trask-Rock	3	206	126
baseline	3	Trask-Rock	3	207	107
baseline	3	Trask-Rock	3	211	191
baseline	3	Trask-Rock	3	212	132
baseline	3	Trask-Rock	3	212	138
baseline	3	Trask-Rock	3	213	115
baseline	3	Trask-Rock	3	214	151
baseline	3	Trask-Rock	3	214	135
baseline	3	Trask-Rock	3	216	137
baseline	4	Trask-Rock	3	190	152
baseline	4	Trask-Rock	3	190	128
baseline	4	Trask-Rock	3	190	82
baseline	4	Trask-Rock	3	190	124
baseline	4	Trask-Rock	3	197	166
baseline	4	Trask-Rock	3	199	115
baseline	4	Trask-Rock	3	199	115
baseline	4	Trask-Rock	3	200	176
baseline	4	Trask-Rock	3	200	5
baseline	4	Trask-Rock	3	201	166
baseline	4	Trask-Rock	3	201	120
baseline	4	Trask-Rock	3	209	136
baseline	4	Trask-Rock	3	211	8
baseline	4	Trask-Rock	3	211	131
baseline	4	Trask-Rock	3	212	145
baseline	4	Trask-Rock	3	213	141
baseline	4	Trask-Rock	3	214	244
baseline	4	Trask-Rock	3	217	151
baseline	4	Trask-Rock	3	218	209
baseline	5	Trask-Rock	3	197	152
baseline	5	Trask-Rock	3	197	113
baseline	5	Trask-Rock	3	197	95
baseline	5	Trask-Rock	3	199	111
baseline	5	Trask-Rock	3	200	144
baseline	5	Trask-Rock	3	200	34
baseline	5	Trask-Rock	3	200	35
baseline	5	Trask-Rock	3	200	115
baseline	5	Trask-Rock	3	200	107
baseline	5	Trask-Rock	3	201	423
baseline	5	Trask-Rock	3	201	193
baseline	5	Trask-Rock	3	201	27
baseline	5	Trask-Rock	3	205	120
baseline	5	Trask-Rock	3	206	201
baseline	5	Trask-Rock	3	207	4
baseline	5	Trask-Rock	3	208	178
baseline	5	Trask-Rock	3	211	136
baseline	5	Trask-Rock	3	212	123
baseline	5	Trask-Rock	3	214	192
baseline	5	Trask-Rock	3	214	190
baseline	1	Trask-UM	3	215	122
baseline	2	Trask-UM	3	219	127
baseline	3	Trask-UM	3	217	124
baseline	3	Trask-UM	3	226	86
baseline	4	Trask-UM	3	215	87
baseline	4	Trask-UM	3	219	174
baseline	4	Trask-UM	3	219	120
baseline	4	Trask-UM	3	219	87
CC	1	Trask-Gus	3	209	971
CC	1	Trask-Gus	3	209	95
CC	1	Trask-Gus	3	209	154
CC	1	Trask-Gus	3	209	595
CC	1	Trask-Gus	3	209	22
CC	1	Trask-Gus	3	210	36
CC	1	Trask-Gus	3	213	275
CC	1	Trask-Gus	3	213	96
CC	1	Trask-Gus	3	215	276
CC	1	Trask-Gus	3	216	162
CC	1	Trask-Gus	3	216	265
CC	1	Trask-Gus	3	216	74
CC	1	Trask-Gus	3	217	284
CC	1	Trask-Gus	3	218	2084
CC	1	Trask-Gus	3	219	273
CC	1	Trask-Gus	3	220	273
CC	2	Trask-Gus	3	204	4
CC	2	Trask-Gus	3	204	247
CC	2	Trask-Gus	3	204	36
CC	2	Trask-Gus	3	204	71
CC	2	Trask-Gus	3	209	245
CC	2	Trask-Gus	3	209	179
CC	2	Trask-Gus	3	209	253
CC	2	Trask-Gus	3	209	230
CC	2	Trask-Gus	3	209	100
CC	2	Trask-Gus	3	210	314
CC	2	Trask-Gus	3	210	222
CC	2	Trask-Gus	3	210	220
CC	2	Trask-Gus	3	210	53
CC	2	Trask-Gus	3	211	320
CC	2	Trask-Gus	3	212	297
CC	2	Trask-Gus	3	212	233
CC	2	Trask-Gus	3	215	32
CC	2	Trask-Gus	3	215	328
CC	2	Trask-Gus	3	215	238
CC	2	Trask-Gus	3	215	227
CC	2	Trask-Gus	3	215	196
CC	2	Trask-Gus	3	216	306
CC	2	Trask-Gus	3	216	235
CC	2	Trask-Gus	3	216	186
CC	2	Trask-Gus	3	216	120
CC	2	Trask-Gus	3	217	268
CC	2	Trask-Gus	3	218	313
CC	2	Trask-Gus	3	218	237
CC	2	Trask-Gus	3	219	216
CC	2	Trask-Gus	3	220	214
CC	2	Trask-Gus	3	220	124
CC	2	Trask-Gus	3	220	92
CC	3	Trask-Gus	3	204	54
CC	3	Trask-Gus	3	209	279
CC	3	Trask-Gus	3	209	47
CC	3	Trask-Gus	3	209	70
CC	3	Trask-Gus	3	210	304
CC	3	Trask-Gus	3	211	31
CC	3	Trask-Gus	3	211	3
CC	3	Trask-Gus	3	211	27
CC	3	Trask-Gus	3	211	219
CC	3	Trask-Gus	3	211	97
CC	3	Trask-Gus	3	212	164
CC	3	Trask-Gus	3	213	250
CC	3	Trask-Gus	3	215	190
CC	3	Trask-Gus	3	215	290
CC	3	Trask-Gus	3	215	155
CC	3	Trask-Gus	3	215	116
CC	3	Trask-Gus	3	216	177
CC	3	Trask-Gus	3	216	265
CC	3	Trask-Gus	3	217	34
CC	3	Trask-Gus	3	219	343
CC	3	Trask-Gus	3	219	267
CC	3	Trask-Gus	3	220	274
CC	3	Trask-Gus	3	220	194
CC	4	Trask-Gus	3	204	217
CC	4	Trask-Gus	3	204	52
CC	4	Trask-Gus	3	204	109
CC	4	Trask-Gus	3	209	262
CC	4	Trask-Gus	3	209	288
CC	4	Trask-Gus	3	209	150
CC	4	Trask-Gus	3	209	19
CC	4	Trask-Gus	3	211	986
CC	4	Trask-Gus	3	211	270
CC	4	Trask-Gus	3	212	302
CC	4	Trask-Gus	3	213	245
CC	4	Trask-Gus	3	215	305
CC	4	Trask-Gus	3	216	28
CC	4	Trask-Gus	3	216	171
CC	4	Trask-Gus	3	216	91
CC	4	Trask-Gus	3	217	123
CC	4	Trask-Gus	3	219	264
CC	4	Trask-Gus	3	220	1858
CC	4	Trask-Gus	3	220	246
CC	4	Trask-Gus	3	220	132
CC	5	Trask-Gus	3	204	300
CC	5	Trask-Gus	3	204	127
CC	5	Trask-Gus	3	204	198
CC	5	Trask-Gus	3	204	129
CC	5	Trask-Gus	3	204	119
CC	5	Trask-Gus	3	210	52
CC	5	Trask-Gus	3	210	70
CC	5	Trask-Gus	3	211	218
CC	5	Trask-Gus	3	212	499
CC	5	Trask-Gus	3	212	109
CC	5	Trask-Gus	3	213	221
CC	5	Trask-Gus	3	215	290
CC	5	Trask-Gus	3	215	232
CC	5	Trask-Gus	3	216	327
CC	5	Trask-Gus	3	217	185
CC	5	Trask-Gus	3	217	91
CC	5	Trask-Gus	3	219	399
CC	1	Trask-Pothole	3	201	92
CC	1	Trask-Pothole	3	203	171
CC	1	Trask-Pothole	3	204	81
CC	1	Trask-Pothole	3	205	124
CC	1	Trask-Pothole	3	208	95
CC	1	Trask-Pothole	3	210	86
CC	1	Trask-Pothole	3	210	144
CC	1	Trask-Pothole	3	212	122
CC	1	Trask-Pothole	3	214	114
CC	1	Trask-Pothole	3	215	190
CC	2	Trask-Pothole	3	205	237
CC	2	Trask-Pothole	3	205	166
CC	2	Trask-Pothole	3	205	41
CC	2	Trask-Pothole	3	208	141
CC	2	Trask-Pothole	3	210	107
CC	2	Trask-Pothole	3	212	112
CC	3	Trask-Pothole	3	201	97
CC	3	Trask-Pothole	3	203	99
CC	3	Trask-Pothole	3	205	4
CC	3	Trask-Pothole	3	208	149
CC	3	Trask-Pothole	3	212	126
CC	3	Trask-Pothole	3	215	121
CC	4	Trask-Pothole	3	201	108
CC	4	Trask-Pothole	3	203	60
CC	4	Trask-Pothole	3	204	23
CC	4	Trask-Pothole	3	207	47
CC	4	Trask-Pothole	3	211	71
CC	4	Trask-Pothole	3	211	126
CC	4	Trask-Pothole	3	211	126
CC	4	Trask-Pothole	3	212	186
CC	4	Trask-Pothole	3	215	113
CC	4	Trask-Pothole	3	217	313
CC	4	Trask-Pothole	3	220	142
CC	5	Trask-Pothole	3	206	147
CC	5	Trask-Pothole	3	207	36
CC	5	Trask-Pothole	3	211	92
CC	5	Trask-Pothole	3	215	117
CC	5	Trask-Pothole	3	215	99
CC	5	Trask-Pothole	3	219	120
CC	1	Trask-Rock	3	190	106
CC	1	Trask-Rock	3	190	133
CC	1	Trask-Rock	3	190	6
CC	1	Trask-Rock	3	190	12
CC	1	Trask-Rock	3	197	170
CC	1	Trask-Rock	3	197	97
CC	1	Trask-Rock	3	197	128
CC	1	Trask-Rock	3	199	168
CC	1	Trask-Rock	3	200	123
CC	1	Trask-Rock	3	200	117
CC	1	Trask-Rock	3	200	113
CC	1	Trask-Rock	3	200	152
CC	1	Trask-Rock	3	201	42
CC	1	Trask-Rock	3	201	275
CC	1	Trask-Rock	3	201	25
CC	1	Trask-Rock	3	201	17
CC	1	Trask-Rock	3	201	110
CC	1	Trask-Rock	3	203	108
CC	1	Trask-Rock	3	205	162
CC	1	Trask-Rock	3	205	130
CC	1	Trask-Rock	3	208	133
CC	1	Trask-Rock	3	209	148
CC	1	Trask-Rock	3	212	148
CC	1	Trask-Rock	3	212	59
CC	1	Trask-Rock	3	212	125
CC	1	Trask-Rock	3	218	452
CC	2	Trask-Rock	3	138	0
CC	2	Trask-Rock	3	190	155
CC	2	Trask-Rock	3	197	155
CC	2	Trask-Rock	3	197	183
CC	2	Trask-Rock	3	197	179
CC	2	Trask-Rock	3	197	129
CC	2	Trask-Rock	3	200	186
CC	2	Trask-Rock	3	200	176
CC	2	Trask-Rock	3	200	49
CC	2	Trask-Rock	3	203	162
CC	2	Trask-Rock	3	203	123
CC	2	Trask-Rock	3	205	130
CC	2	Trask-Rock	3	205	134
CC	2	Trask-Rock	3	206	93
CC	2	Trask-Rock	3	206	189
CC	2	Trask-Rock	3	208	138
CC	2	Trask-Rock	3	209	186
CC	2	Trask-Rock	3	211	143
CC	3	Trask-Rock	3	197	166
CC	3	Trask-Rock	3	197	98
CC	3	Trask-Rock	3	197	114
CC	3	Trask-Rock	3	199	186
CC	3	Trask-Rock	3	200	162
CC	3	Trask-Rock	3	205	122
CC	3	Trask-Rock	3	206	126
CC	3	Trask-Rock	3	207	107
CC	3	Trask-Rock	3	211	191
CC	3	Trask-Rock	3	212	132
CC	3	Trask-Rock	3	212	138
CC	3	Trask-Rock	3	213	115
CC	3	Trask-Rock	3	214	151
CC	3	Trask-Rock	3	214	135
CC	3	Trask-Rock	3	216	137
CC	4	Trask-Rock	3	190	152
CC	4	Trask-Rock	3	190	128
CC	4	Trask-Rock	3	190	82
CC	4	Trask-Rock	3	190	124
CC	4	Trask-Rock	3	197	166
CC	4	Trask-Rock	3	199	115
CC	4	Trask-Rock	3	199	115
CC	4	Trask-Rock	3	200	176
CC	4	Trask-Rock	3	200	5
CC	4	Trask-Rock	3	201	166
CC	4	Trask-Rock	3	201	120
CC	4	Trask-Rock	3	209	136
CC	4	Trask-Rock	3	211	8
CC	4	Trask-Rock	3	211	131
CC	4	Trask-Rock	3	212	145
CC	4	Trask-Rock	3	213	141
CC	4	Trask-Rock	3	214	244
CC	4	Trask-Rock	3	217	151
CC	4	Trask-Rock	3	218	209
CC	5	Trask-Rock	3	197	152
CC	5	Trask-Rock	3	197	113
CC	5	Trask-Rock	3	197	95
CC	5	Trask-Rock	3	199	111
CC	5	Trask-Rock	3	200	144
CC	5	Trask-Rock	3	200	34
CC	5	Trask-Rock	3	200	35
CC	5	Trask-Rock	3	200	115
CC	5	Trask-Rock	3	200	107
CC	5	Trask-Rock	3	201	423
CC	5	Trask-Rock	3	201	193
CC	5	Trask-Rock	3	201	27
CC	5	Trask-Rock	3	205	120
CC	5	Trask-Rock	3	206	201
CC	5	Trask-Rock	3	207	4
CC	5	Trask-Rock	3	208	178
CC	5	Trask-Rock	3	211	136
CC	5	Trask-Rock	3	212	123
CC	5	Trask-Rock	3	214	192
CC	5	Trask-Rock	3	214	190
CC	1	Trask-UM	3	215	122
CC	2	Trask-UM	3	219	127
CC	3	Trask-UM	3	217	124
CC	3	Trask-UM	3	226	86
CC	4	Trask-UM	3	215	87
CC	4	Trask-UM	3	219	174
CC	4	Trask-UM	3	219	120
CC	4	Trask-UM	3	219	87
FH	1	Trask-Gus	3	204	189
FH	1	Trask-Gus	3	210	617
FH	1	Trask-Gus	3	211	221
FH	1	Trask-Gus	3	211	188
FH	1	Trask-Gus	3	215	209
FH	1	Trask-Gus	3	216	618
FH	1	Trask-Gus	3	216	236
FH	2	Trask-Gus	3	210	193
FH	2	Trask-Gus	3	211	1505
FH	2	Trask-Gus	3	211	5
FH	2	Trask-Gus	3	211	156
FH	2	Trask-Gus	3	211	38
FH	2	Trask-Gus	3	211	88
FH	2	Trask-Gus	3	212	4
FH	2	Trask-Gus	3	213	211
FH	2	Trask-Gus	3	217	201
FH	2	Trask-Gus	3	218	929
FH	2	Trask-Gus	3	220	178
FH	3	Trask-Gus	3	209	239
FH	3	Trask-Gus	3	210	102
FH	3	Trask-Gus	3	211	204
FH	3	Trask-Gus	3	212	245
FH	3	Trask-Gus	3	215	250
FH	3	Trask-Gus	3	217	1073
FH	3	Trask-Gus	3	220	253
FH	4	Trask-Gus	3	204	226
FH	4	Trask-Gus	3	204	75
FH	4	Trask-Gus	3	209	92
FH	4	Trask-Gus	3	209	151
FH	4	Trask-Gus	3	209	112
FH	4	Trask-Gus	3	209	288
FH	4	Trask-Gus	3	209	258
FH	4	Trask-Gus	3	209	113
FH	4	Trask-Gus	3	210	382
FH	4	Trask-Gus	3	210	216
FH	4	Trask-Gus	3	211	1363
FH	4	Trask-Gus	3	212	970
FH	4	Trask-Gus	3	212	297
FH	4	Trask-Gus	3	215	60
FH	4	Trask-Gus	3	215	85
FH	4	Trask-Gus	3	215	290
FH	4	Trask-Gus	3	216	163
FH	4	Trask-Gus	3	216	158
FH	4	Trask-Gus	3	216	237
FH	4	Trask-Gus	3	217	260
FH	4	Trask-Gus	3	218	297
FH	4	Trask-Gus	3	219	923
FH	4	Trask-Gus	3	219	17
FH	4	Trask-Gus	3	219	226
FH	4	Trask-Gus	3	219	121
FH	4	Trask-Gus	3	219	302
FH	4	Trask-Gus	3	219	200
FH	4	Trask-Gus	3	219	158
FH	5	Trask-Gus	3	210	185
FH	5	Trask-Gus	3	212	1155
FH	5	Trask-Gus	3	215	639
FH	5	Trask-Gus	3	216	218
FH	5	Trask-Gus	3	216	158
FH	5	Trask-Gus	3	219	168
FH	5	Trask-Gus	3	220	648
FH	1	Trask-Pothole	3	201	92
FH	1	Trask-Pothole	3	203	171
FH	1	Trask-Pothole	3	204	81
FH	1	Trask-Pothole	3	205	124
FH	1	Trask-Pothole	3	208	95
FH	1	Trask-Pothole	3	210	86
FH	1	Trask-Pothole	3	210	144
FH	1	Trask-Pothole	3	212	122
FH	1	Trask-Pothole	3	214	114
FH	1	Trask-Pothole	3	215	190
FH	2	Trask-Pothole	3	205	237
FH	2	Trask-Pothole	3	205	166
FH	2	Trask-Pothole	3	205	41
FH	2	Trask-Pothole	3	208	141
FH	2	Trask-Pothole	3	210	107
FH	2	Trask-Pothole	3	212	112
FH	3	Trask-Pothole	3	201	97
FH	3	Trask-Pothole	3	203	99
FH	3	Trask-Pothole	3	205	4
FH	3	Trask-Pothole	3	208	149
FH	3	Trask-Pothole	3	212	126
FH	3	Trask-Pothole	3	215	121
FH	4	Trask-Pothole	3	201	108
FH	4	Trask-Pothole	3	203	60
FH	4	Trask-Pothole	3	204	23
FH	4	Trask-Pothole	3	207	47
FH	4	Trask-Pothole	3	211	71
FH	4	Trask-Pothole	3	211	126
FH	4	Trask-Pothole	3	211	126
FH	4	Trask-Pothole	3	212	186
FH	4	Trask-Pothole	3	215	113
FH	4	Trask-Pothole	3	217	313
FH	4	Trask-Pothole	3	220	142
FH	5	Trask-Pothole	3	206	147
FH	5	Trask-Pothole	3	207	36
FH	5	Trask-Pothole	3	211	92
FH	5	Trask-Pothole	3	215	117
FH	5	Trask-Pothole	3	215	99
FH	5	Trask-Pothole	3	219	120
FH	1	Trask-Rock	3	190	106
FH	1	Trask-Rock	3	190	133
FH	1	Trask-Rock	3	190	6
FH	1	Trask-Rock	3	190	12
FH	1	Trask-Rock	3	197	170
FH	1	Trask-Rock	3	197	97
FH	1	Trask-Rock	3	197	128
FH	1	Trask-Rock	3	199	168
FH	1	Trask-Rock	3	200	123
FH	1	Trask-Rock	3	200	117
FH	1	Trask-Rock	3	200	113
FH	1	Trask-Rock	3	200	152
FH	1	Trask-Rock	3	201	42
FH	1	Trask-Rock	3	201	275
FH	1	Trask-Rock	3	201	25
FH	1	Trask-Rock	3	201	17
FH	1	Trask-Rock	3	201	110
FH	1	Trask-Rock	3	203	108
FH	1	Trask-Rock	3	205	162
FH	1	Trask-Rock	3	205	130
FH	1	Trask-Rock	3	208	133
FH	1	Trask-Rock	3	209	148
FH	1	Trask-Rock	3	212	148
FH	1	Trask-Rock	3	212	59
FH	1	Trask-Rock	3	212	125
FH	1	Trask-Rock	3	218	452
FH	2	Trask-Rock	3	138	0
FH	2	Trask-Rock	3	190	155
FH	2	Trask-Rock	3	197	155
FH	2	Trask-Rock	3	197	183
FH	2	Trask-Rock	3	197	179
FH	2	Trask-Rock	3	197	129
FH	2	Trask-Rock	3	200	186
FH	2	Trask-Rock	3	200	176
FH	2	Trask-Rock	3	200	49
FH	2	Trask-Rock	3	203	162
FH	2	Trask-Rock	3	203	123
FH	2	Trask-Rock	3	205	130
FH	2	Trask-Rock	3	205	134
FH	2	Trask-Rock	3	206	93
FH	2	Trask-Rock	3	206	189
FH	2	Trask-Rock	3	208	138
FH	2	Trask-Rock	3	209	186
FH	2	Trask-Rock	3	211	143
FH	3	Trask-Rock	3	197	166
FH	3	Trask-Rock	3	197	98
FH	3	Trask-Rock	3	197	114
FH	3	Trask-Rock	3	199	186
FH	3	Trask-Rock	3	200	162
FH	3	Trask-Rock	3	205	122
FH	3	Trask-Rock	3	206	126
FH	3	Trask-Rock	3	207	107
FH	3	Trask-Rock	3	211	191
FH	3	Trask-Rock	3	212	132
FH	3	Trask-Rock	3	212	138
FH	3	Trask-Rock	3	213	115
FH	3	Trask-Rock	3	214	151
FH	3	Trask-Rock	3	214	135
FH	3	Trask-Rock	3	216	137
FH	4	Trask-Rock	3	190	152
FH	4	Trask-Rock	3	190	128
FH	4	Trask-Rock	3	190	82
FH	4	Trask-Rock	3	190	124
FH	4	Trask-Rock	3	197	166
FH	4	Trask-Rock	3	199	115
FH	4	Trask-Rock	3	199	115
FH	4	Trask-Rock	3	200	176
FH	4	Trask-Rock	3	200	5
FH	4	Trask-Rock	3	201	166
FH	4	Trask-Rock	3	201	120
FH	4	Trask-Rock	3	209	136
FH	4	Trask-Rock	3	211	8
FH	4	Trask-Rock	3	211	131
FH	4	Trask-Rock	3	212	145
FH	4	Trask-Rock	3	213	141
FH	4	Trask-Rock	3	214	244
FH	4	Trask-Rock	3	217	151
FH	4	Trask-Rock	3	218	209
FH	5	Trask-Rock	3	197	152
FH	5	Trask-Rock	3	197	113
FH	5	Trask-Rock	3	197	95
FH	5	Trask-Rock	3	199	111
FH	5	Trask-Rock	3	200	144
FH	5	Trask-Rock	3	200	34
FH	5	Trask-Rock	3	200	35
FH	5	Trask-Rock	3	200	115
FH	5	Trask-Rock	3	200	107
FH	5	Trask-Rock	3	201	423
FH	5	Trask-Rock	3	201	193
FH	5	Trask-Rock	3	201	27
FH	5	Trask-Rock	3	205	120
FH	5	Trask-Rock	3	206	201
FH	5	Trask-Rock	3	207	4
FH	5	Trask-Rock	3	208	178
FH	5	Trask-Rock	3	211	136
FH	5	Trask-Rock	3	212	123
FH	5	Trask-Rock	3	214	192
FH	5	Trask-Rock	3	214	190
FH	1	Trask-UM	3	215	122
FH	2	Trask-UM	3	219	127
FH	3	Trask-UM	3	215	131
FH	3	Trask-UM	3	223	122
FH	4	Trask-UM	3	215	87
FH	4	Trask-UM	3	219	174
FH	4	Trask-UM	3	219	120
FH	4	Trask-UM	3	219	87
FH	5	Trask-UM	3	216	147
FH	5	Trask-UM	3	217	133
FH+CC	1	Trask-Gus	3	204	477
FH+CC	1	Trask-Gus	3	204	142
FH+CC	1	Trask-Gus	3	209	1053
FH+CC	1	Trask-Gus	3	209	220
FH+CC	1	Trask-Gus	3	209	65
FH+CC	1	Trask-Gus	3	209	131
FH+CC	1	Trask-Gus	3	210	24
FH+CC	1	Trask-Gus	3	211	178
FH+CC	1	Trask-Gus	3	212	79
FH+CC	1	Trask-Gus	3	213	236
FH+CC	1	Trask-Gus	3	213	232
FH+CC	1	Trask-Gus	3	213	140
FH+CC	1	Trask-Gus	3	216	297
FH+CC	1	Trask-Gus	3	216	285
FH+CC	1	Trask-Gus	3	216	241
FH+CC	1	Trask-Gus	3	219	216
FH+CC	1	Trask-Gus	3	220	295
FH+CC	1	Trask-Gus	3	220	276
FH+CC	1	Trask-Gus	3	220	206
FH+CC	2	Trask-Gus	3	204	3
FH+CC	2	Trask-Gus	3	209	206
FH+CC	2	Trask-Gus	3	209	43
FH+CC	2	Trask-Gus	3	209	257
FH+CC	2	Trask-Gus	3	211	228
FH+CC	2	Trask-Gus	3	212	287
FH+CC	2	Trask-Gus	3	216	239
FH+CC	2	Trask-Gus	3	218	111
FH+CC	2	Trask-Gus	3	219	301
FH+CC	2	Trask-Gus	3	219	98
FH+CC	2	Trask-Gus	3	219	317
FH+CC	2	Trask-Gus	3	219	198
FH+CC	2	Trask-Gus	3	220	370
FH+CC	2	Trask-Gus	3	220	224
FH+CC	3	Trask-Gus	3	204	58
FH+CC	3	Trask-Gus	3	209	222
FH+CC	3	Trask-Gus	3	211	156
FH+CC	3	Trask-Gus	3	211	41
FH+CC	3	Trask-Gus	3	211	134
FH+CC	3	Trask-Gus	3	211	221
FH+CC	3	Trask-Gus	3	213	284
FH+CC	3	Trask-Gus	3	215	266
FH+CC	3	Trask-Gus	3	216	34
FH+CC	3	Trask-Gus	3	216	153
FH+CC	3	Trask-Gus	3	217	269
FH+CC	3	Trask-Gus	3	220	229
FH+CC	3	Trask-Gus	3	220	233
FH+CC	4	Trask-Gus	3	204	473
FH+CC	4	Trask-Gus	3	204	43
FH+CC	4	Trask-Gus	3	204	73
FH+CC	4	Trask-Gus	3	204	109
FH+CC	4	Trask-Gus	3	209	264
FH+CC	4	Trask-Gus	3	209	109
FH+CC	4	Trask-Gus	3	210	13
FH+CC	4	Trask-Gus	3	211	279
FH+CC	4	Trask-Gus	3	211	236
FH+CC	4	Trask-Gus	3	211	93
FH+CC	4	Trask-Gus	3	211	99
FH+CC	4	Trask-Gus	3	211	240
FH+CC	4	Trask-Gus	3	213	190
FH+CC	4	Trask-Gus	3	216	1155
FH+CC	4	Trask-Gus	3	216	297
FH+CC	4	Trask-Gus	3	219	239
FH+CC	4	Trask-Gus	3	219	56
FH+CC	4	Trask-Gus	3	219	118
FH+CC	4	Trask-Gus	3	219	91
FH+CC	5	Trask-Gus	3	209	281
FH+CC	5	Trask-Gus	3	209	289
FH+CC	5	Trask-Gus	3	209	303
FH+CC	5	Trask-Gus	3	209	223
FH+CC	5	Trask-Gus	3	209	44
FH+CC	5	Trask-Gus	3	209	90
FH+CC	5	Trask-Gus	3	210	76
FH+CC	5	Trask-Gus	3	210	81
FH+CC	5	Trask-Gus	3	210	105
FH+CC	5	Trask-Gus	3	211	130
FH+CC	5	Trask-Gus	3	213	391
FH+CC	5	Trask-Gus	3	213	224
FH+CC	5	Trask-Gus	3	215	183
FH+CC	5	Trask-Gus	3	216	193
FH+CC	5	Trask-Gus	3	216	172
FH+CC	5	Trask-Gus	3	218	96
FH+CC	5	Trask-Gus	3	219	231
FH+CC	5	Trask-Gus	3	219	291
FH+CC	5	Trask-Gus	3	219	231
FH+CC	1	Trask-Pothole	3	201	92
FH+CC	1	Trask-Pothole	3	203	171
FH+CC	1	Trask-Pothole	3	204	81
FH+CC	1	Trask-Pothole	3	205	124
FH+CC	1	Trask-Pothole	3	208	95
FH+CC	1	Trask-Pothole	3	210	86
FH+CC	1	Trask-Pothole	3	210	144
FH+CC	1	Trask-Pothole	3	212	122
FH+CC	1	Trask-Pothole	3	214	114
FH+CC	1	Trask-Pothole	3	215	190
FH+CC	2	Trask-Pothole	3	205	237
FH+CC	2	Trask-Pothole	3	205	166
FH+CC	2	Trask-Pothole	3	205	41
FH+CC	2	Trask-Pothole	3	208	141
FH+CC	2	Trask-Pothole	3	210	107
FH+CC	2	Trask-Pothole	3	212	112
FH+CC	3	Trask-Pothole	3	201	97
FH+CC	3	Trask-Pothole	3	203	99
FH+CC	3	Trask-Pothole	3	205	4
FH+CC	3	Trask-Pothole	3	208	149
FH+CC	3	Trask-Pothole	3	212	126
FH+CC	3	Trask-Pothole	3	215	121
FH+CC	4	Trask-Pothole	3	201	108
FH+CC	4	Trask-Pothole	3	203	60
FH+CC	4	Trask-Pothole	3	204	23
FH+CC	4	Trask-Pothole	3	207	47
FH+CC	4	Trask-Pothole	3	211	71
FH+CC	4	Trask-Pothole	3	211	126
FH+CC	4	Trask-Pothole	3	211	126
FH+CC	4	Trask-Pothole	3	212	186
FH+CC	4	Trask-Pothole	3	215	113
FH+CC	4	Trask-Pothole	3	217	313
FH+CC	4	Trask-Pothole	3	220	142
FH+CC	5	Trask-Pothole	3	206	147
FH+CC	5	Trask-Pothole	3	207	36
FH+CC	5	Trask-Pothole	3	211	92
FH+CC	5	Trask-Pothole	3	215	117
FH+CC	5	Trask-Pothole	3	215	99
FH+CC	5	Trask-Pothole	3	219	120
FH+CC	1	Trask-Rock	3	190	106
FH+CC	1	Trask-Rock	3	190	133
FH+CC	1	Trask-Rock	3	190	6
FH+CC	1	Trask-Rock	3	190	12
FH+CC	1	Trask-Rock	3	197	170
FH+CC	1	Trask-Rock	3	197	97
FH+CC	1	Trask-Rock	3	197	128
FH+CC	1	Trask-Rock	3	199	168
FH+CC	1	Trask-Rock	3	200	123
FH+CC	1	Trask-Rock	3	200	117
FH+CC	1	Trask-Rock	3	200	113
FH+CC	1	Trask-Rock	3	200	152
FH+CC	1	Trask-Rock	3	201	42
FH+CC	1	Trask-Rock	3	201	275
FH+CC	1	Trask-Rock	3	201	25
FH+CC	1	Trask-Rock	3	201	17
FH+CC	1	Trask-Rock	3	201	110
FH+CC	1	Trask-Rock	3	203	108
FH+CC	1	Trask-Rock	3	205	162
FH+CC	1	Trask-Rock	3	205	130
FH+CC	1	Trask-Rock	3	208	133
FH+CC	1	Trask-Rock	3	209	148
FH+CC	1	Trask-Rock	3	212	148
FH+CC	1	Trask-Rock	3	212	59
FH+CC	1	Trask-Rock	3	212	125
FH+CC	1	Trask-Rock	3	218	452
FH+CC	2	Trask-Rock	3	138	0
FH+CC	2	Trask-Rock	3	190	155
FH+CC	2	Trask-Rock	3	197	155
FH+CC	2	Trask-Rock	3	197	183
FH+CC	2	Trask-Rock	3	197	179
FH+CC	2	Trask-Rock	3	197	129
FH+CC	2	Trask-Rock	3	200	186
FH+CC	2	Trask-Rock	3	200	176
FH+CC	2	Trask-Rock	3	200	49
FH+CC	2	Trask-Rock	3	203	162
FH+CC	2	Trask-Rock	3	203	123
FH+CC	2	Trask-Rock	3	205	130
FH+CC	2	Trask-Rock	3	205	134
FH+CC	2	Trask-Rock	3	206	93
FH+CC	2	Trask-Rock	3	206	189
FH+CC	2	Trask-Rock	3	208	138
FH+CC	2	Trask-Rock	3	209	186
FH+CC	2	Trask-Rock	3	211	143
FH+CC	3	Trask-Rock	3	197	166
FH+CC	3	Trask-Rock	3	197	98
FH+CC	3	Trask-Rock	3	197	114
FH+CC	3	Trask-Rock	3	199	186
FH+CC	3	Trask-Rock	3	200	162
FH+CC	3	Trask-Rock	3	205	122
FH+CC	3	Trask-Rock	3	206	126
FH+CC	3	Trask-Rock	3	207	107
FH+CC	3	Trask-Rock	3	211	191
FH+CC	3	Trask-Rock	3	212	132
FH+CC	3	Trask-Rock	3	212	138
FH+CC	3	Trask-Rock	3	213	115
FH+CC	3	Trask-Rock	3	214	151
FH+CC	3	Trask-Rock	3	214	135
FH+CC	3	Trask-Rock	3	216	137
FH+CC	4	Trask-Rock	3	190	152
FH+CC	4	Trask-Rock	3	190	128
FH+CC	4	Trask-Rock	3	190	82
FH+CC	4	Trask-Rock	3	190	124
FH+CC	4	Trask-Rock	3	197	166
FH+CC	4	Trask-Rock	3	199	115
FH+CC	4	Trask-Rock	3	199	115
FH+CC	4	Trask-Rock	3	200	176
FH+CC	4	Trask-Rock	3	200	5
FH+CC	4	Trask-Rock	3	201	166
FH+CC	4	Trask-Rock	3	201	120
FH+CC	4	Trask-Rock	3	209	136
FH+CC	4	Trask-Rock	3	211	8
FH+CC	4	Trask-Rock	3	211	131
FH+CC	4	Trask-Rock	3	212	145
FH+CC	4	Trask-Rock	3	213	141
FH+CC	4	Trask-Rock	3	214	244
FH+CC	4	Trask-Rock	3	217	151
FH+CC	4	Trask-Rock	3	218	209
FH+CC	5	Trask-Rock	3	197	152
FH+CC	5	Trask-Rock	3	197	113
FH+CC	5	Trask-Rock	3	197	95
FH+CC	5	Trask-Rock	3	199	111
FH+CC	5	Trask-Rock	3	200	144
FH+CC	5	Trask-Rock	3	200	34
FH+CC	5	Trask-Rock	3	200	35
FH+CC	5	Trask-Rock	3	200	115
FH+CC	5	Trask-Rock	3	200	107
FH+CC	5	Trask-Rock	3	201	423
FH+CC	5	Trask-Rock	3	201	193
FH+CC	5	Trask-Rock	3	201	27
FH+CC	5	Trask-Rock	3	205	120
FH+CC	5	Trask-Rock	3	206	201
FH+CC	5	Trask-Rock	3	207	4
FH+CC	5	Trask-Rock	3	208	178
FH+CC	5	Trask-Rock	3	211	136
FH+CC	5	Trask-Rock	3	212	123
FH+CC	5	Trask-Rock	3	214	192
FH+CC	5	Trask-Rock	3	214	190
FH+CC	1	Trask-UM	3	215	122
FH+CC	2	Trask-UM	3	219	127
FH+CC	3	Trask-UM	3	217	124
FH+CC	3	Trask-UM	3	226	86
FH+CC	4	Trask-UM	3	215	131
FH+CC	4	Trask-UM	3	223	122
FH+CC	5	Trask-UM	3	215	87
FH+CC	5	Trask-UM	3	219	174
FH+CC	5	Trask-UM	3	219	120
FH+CC	5	Trask-UM	3	219	87
baseline	1	Trask-Gus	4	183	110
baseline	1	Trask-Gus	4	183	5
baseline	1	Trask-Gus	4	189	124
baseline	1	Trask-Gus	4	190	501
baseline	1	Trask-Gus	4	195	291
baseline	1	Trask-Gus	4	197	130
baseline	1	Trask-Gus	4	197	133
baseline	1	Trask-Gus	4	199	1921
baseline	1	Trask-Gus	4	200	124
baseline	1	Trask-Gus	4	202	103
baseline	1	Trask-Gus	4	204	130
baseline	1	Trask-Gus	4	205	142
baseline	1	Trask-Gus	4	209	131
baseline	2	Trask-Gus	4	189	93
baseline	2	Trask-Gus	4	190	118
baseline	2	Trask-Gus	4	190	112
baseline	2	Trask-Gus	4	195	156
baseline	2	Trask-Gus	4	200	120
baseline	2	Trask-Gus	4	202	153
baseline	2	Trask-Gus	4	202	142
baseline	2	Trask-Gus	4	202	1
baseline	2	Trask-Gus	4	205	187
baseline	2	Trask-Gus	4	205	135
baseline	2	Trask-Gus	4	206	177
baseline	2	Trask-Gus	4	206	175
baseline	2	Trask-Gus	4	207	104
baseline	2	Trask-Gus	4	208	202
baseline	2	Trask-Gus	4	210	210
baseline	2	Trask-Gus	4	210	186
baseline	2	Trask-Gus	4	211	689
baseline	3	Trask-Gus	4	189	572
baseline	3	Trask-Gus	4	189	501
baseline	3	Trask-Gus	4	190	332
baseline	3	Trask-Gus	4	190	102
baseline	3	Trask-Gus	4	191	1271
baseline	3	Trask-Gus	4	195	611
baseline	3	Trask-Gus	4	196	112
baseline	3	Trask-Gus	4	198	1
baseline	3	Trask-Gus	4	200	1
baseline	3	Trask-Gus	4	203	598
baseline	4	Trask-Gus	4	181	1
baseline	4	Trask-Gus	4	190	0
baseline	4	Trask-Gus	4	191	100
baseline	4	Trask-Gus	4	195	478
baseline	4	Trask-Gus	4	196	152
baseline	4	Trask-Gus	4	200	155
baseline	4	Trask-Gus	4	204	161
baseline	4	Trask-Gus	4	208	512
baseline	4	Trask-Gus	4	208	144
baseline	4	Trask-Gus	4	211	169
baseline	5	Trask-Gus	4	180	9
baseline	5	Trask-Gus	4	183	10
baseline	5	Trask-Gus	4	189	124
baseline	5	Trask-Gus	4	191	144
baseline	5	Trask-Gus	4	195	389
baseline	5	Trask-Gus	4	197	168
baseline	5	Trask-Gus	4	197	165
baseline	5	Trask-Gus	4	199	434
baseline	5	Trask-Gus	4	199	168
baseline	5	Trask-Gus	4	201	2
baseline	5	Trask-Gus	4	202	422
baseline	5	Trask-Gus	4	203	501
baseline	5	Trask-Gus	4	204	25
baseline	5	Trask-Gus	4	204	153
baseline	5	Trask-Gus	4	207	157
baseline	5	Trask-Gus	4	208	178
baseline	5	Trask-Gus	4	209	176
baseline	5	Trask-Gus	4	209	178
baseline	1	Trask-Pothole	4	178	97
baseline	1	Trask-Pothole	4	181	8
baseline	1	Trask-Pothole	4	189	303
baseline	1	Trask-Pothole	4	209	62
[truncated: 55,419 more rows]

## Sheet: fish data
Scenario	Replicate	day	month	simulation year	getReachSymbol	getAgeSymbol	Count	MeanLength	TotalWeight	MeanWeight
baseline	1	1	9	1	Trask-Pothole	Age0	167	15.9907	18020.5	107.907
baseline	1	1	9	1	Trask-Pothole	Age1	66	19.7755	9946.04	150.698
baseline	1	1	9	1	Trask-Pothole	Age2	28	21.9229	6786.85	242.388
baseline	1	1	9	1	Trask-Pothole	Age3Plus	25	45.181	80151.1	3206.05
baseline	2	1	9	1	Trask-Pothole	Age0	168	16.5609	19583	116.566
baseline	2	1	9	1	Trask-Pothole	Age1	65	17.7932	8640.22	132.926
baseline	2	1	9	1	Trask-Pothole	Age2	28	25.5206	11054	394.784
baseline	2	1	9	1	Trask-Pothole	Age3Plus	25	37.3278	31209.5	1248.38
baseline	3	1	9	1	Trask-Pothole	Age0	166	15.7311	17957.1	108.175
baseline	3	1	9	1	Trask-Pothole	Age1	67	17.641	8617.4	128.618
baseline	3	1	9	1	Trask-Pothole	Age2	27	26.8018	10416.3	385.788
baseline	3	1	9	1	Trask-Pothole	Age3Plus	25	31.57	26852	1074.08
baseline	4	1	9	1	Trask-Pothole	Age0	168	16.8784	20378.6	121.301
baseline	4	1	9	1	Trask-Pothole	Age1	66	16.457	7375.4	111.748
baseline	4	1	9	1	Trask-Pothole	Age2	28	22.7184	10115.3	361.26
baseline	4	1	9	1	Trask-Pothole	Age3Plus	25	38.4641	30975.2	1239.01
baseline	5	1	9	1	Trask-Pothole	Age0	164	15.9334	15551.5	94.8262
baseline	5	1	9	1	Trask-Pothole	Age1	66	18.1399	8390.54	127.129
baseline	5	1	9	1	Trask-Pothole	Age2	28	20.8172	7090.5	253.232
baseline	5	1	9	1	Trask-Pothole	Age3Plus	25	40.6955	56467.8	2258.71
baseline	1	1	9	1	Trask-Rock	Age0	170	16.1076	18556.5	109.156
baseline	1	1	9	1	Trask-Rock	Age1	67	19.1655	9711.87	144.953
baseline	1	1	9	1	Trask-Rock	Age2	28	23.8345	8280.64	295.737
baseline	1	1	9	1	Trask-Rock	Age3Plus	24	46.4641	54675.4	2278.14
baseline	2	1	9	1	Trask-Rock	Age0	169	16.1746	17835.4	105.535
baseline	2	1	9	1	Trask-Rock	Age1	66	18.618	9239.39	139.991
baseline	2	1	9	1	Trask-Rock	Age2	28	22.0112	6382.17	227.935
baseline	2	1	9	1	Trask-Rock	Age3Plus	25	47.8266	61572	2462.88
baseline	3	1	9	1	Trask-Rock	Age0	165	16.0718	17880.3	108.365
baseline	3	1	9	1	Trask-Rock	Age1	66	20.1555	10933.9	165.666
baseline	3	1	9	1	Trask-Rock	Age2	27	27.3551	12251.1	453.746
baseline	3	1	9	1	Trask-Rock	Age3Plus	25	42.3541	37860.7	1514.43
baseline	4	1	9	1	Trask-Rock	Age0	165	16.116	16934.2	102.632
baseline	4	1	9	1	Trask-Rock	Age1	67	16.4868	6512.72	97.2047
baseline	4	1	9	1	Trask-Rock	Age2	28	21.8986	5226.5	186.661
baseline	4	1	9	1	Trask-Rock	Age3Plus	25	42.2758	37958.1	1518.32
baseline	5	1	9	1	Trask-Rock	Age0	163	16.3	18916.7	116.053
baseline	5	1	9	1	Trask-Rock	Age1	66	20.0979	12690.2	192.276
baseline	5	1	9	1	Trask-Rock	Age2	28	21.7393	7945.58	283.771
baseline	5	1	9	1	Trask-Rock	Age3Plus	25	42.6725	44266.5	1770.66
baseline	1	1	9	1	Trask-UM	Age0	170	16.0571	17712.7	104.192
baseline	1	1	9	1	Trask-UM	Age1	67	19.7018	12427.2	185.481
baseline	1	1	9	1	Trask-UM	Age2	28	23.8796	9025.24	322.33
baseline	1	1	9	1	Trask-UM	Age3Plus	25	41.4799	45987.7	1839.51
baseline	2	1	9	1	Trask-UM	Age0	170	15.8976	19272.8	113.369
baseline	2	1	9	1	Trask-UM	Age1	66	18.1307	8824.94	133.711
baseline	2	1	9	1	Trask-UM	Age2	28	28.5673	15518.5	554.233
baseline	2	1	9	1	Trask-UM	Age3Plus	25	37.4855	46724.8	1868.99
baseline	3	1	9	1	Trask-UM	Age0	168	16.8131	18478.5	109.991
baseline	3	1	9	1	Trask-UM	Age1	67	20.222	13808.6	206.099
baseline	3	1	9	1	Trask-UM	Age2	28	23.7323	8127.6	290.272
baseline	3	1	9	1	Trask-UM	Age3Plus	25	38.6033	57219	2288.76
baseline	4	1	9	1	Trask-UM	Age0	170	18.1163	23637.2	139.043
baseline	4	1	9	1	Trask-UM	Age1	67	16.8815	7167.05	106.971
baseline	4	1	9	1	Trask-UM	Age2	28	26.02	11616.6	414.878
baseline	4	1	9	1	Trask-UM	Age3Plus	25	42.756	47763.8	1910.55
baseline	5	1	9	1	Trask-UM	Age0	170	17.1303	22004.2	129.437
baseline	5	1	9	1	Trask-UM	Age1	67	19.1949	12053.9	179.909
baseline	5	1	9	1	Trask-UM	Age2	28	23.0837	7302.31	260.797
baseline	5	1	9	1	Trask-UM	Age3Plus	25	45.3875	56330.5	2253.22
FH	1	1	9	1	Trask-Pothole	Age0	167	15.9907	18020.5	107.907
FH	1	1	9	1	Trask-Pothole	Age1	66	19.7755	9946.04	150.698
FH	1	1	9	1	Trask-Pothole	Age2	28	21.9229	6786.85	242.388
FH	1	1	9	1	Trask-Pothole	Age3Plus	25	45.181	80151.1	3206.05
FH	2	1	9	1	Trask-Pothole	Age0	168	16.5609	19583	116.566
FH	2	1	9	1	Trask-Pothole	Age1	65	17.7932	8640.22	132.926
FH	2	1	9	1	Trask-Pothole	Age2	28	25.5206	11054	394.784
FH	2	1	9	1	Trask-Pothole	Age3Plus	25	37.3278	31209.5	1248.38
FH	3	1	9	1	Trask-Pothole	Age0	166	15.7311	17957.1	108.175
FH	3	1	9	1	Trask-Pothole	Age1	67	17.641	8617.4	128.618
FH	3	1	9	1	Trask-Pothole	Age2	27	26.8018	10416.3	385.788
FH	3	1	9	1	Trask-Pothole	Age3Plus	25	31.57	26852	1074.08
FH	4	1	9	1	Trask-Pothole	Age0	168	16.8784	20378.6	121.301
FH	4	1	9	1	Trask-Pothole	Age1	66	16.457	7375.4	111.748
FH	4	1	9	1	Trask-Pothole	Age2	28	22.7184	10115.3	361.26
FH	4	1	9	1	Trask-Pothole	Age3Plus	25	38.4641	30975.2	1239.01
FH	5	1	9	1	Trask-Pothole	Age0	164	15.9334	15551.5	94.8262
FH	5	1	9	1	Trask-Pothole	Age1	66	18.1399	8390.54	127.129
FH	5	1	9	1	Trask-Pothole	Age2	28	20.8172	7090.5	253.232
FH	5	1	9	1	Trask-Pothole	Age3Plus	25	40.6955	56467.8	2258.71
FH	1	1	9	1	Trask-Rock	Age0	170	16.1076	18556.5	109.156
FH	1	1	9	1	Trask-Rock	Age1	67	19.1655	9711.87	144.953
FH	1	1	9	1	Trask-Rock	Age2	28	23.8345	8280.64	295.737
FH	1	1	9	1	Trask-Rock	Age3Plus	24	46.4641	54675.4	2278.14
FH	2	1	9	1	Trask-Rock	Age0	169	16.1746	17835.4	105.535
FH	2	1	9	1	Trask-Rock	Age1	66	18.618	9239.39	139.991
FH	2	1	9	1	Trask-Rock	Age2	28	22.0112	6382.17	227.935
FH	2	1	9	1	Trask-Rock	Age3Plus	25	47.8266	61572	2462.88
FH	3	1	9	1	Trask-Rock	Age0	165	16.0718	17880.3	108.365
FH	3	1	9	1	Trask-Rock	Age1	66	20.1555	10933.9	165.666
FH	3	1	9	1	Trask-Rock	Age2	27	27.3551	12251.1	453.746
FH	3	1	9	1	Trask-Rock	Age3Plus	25	42.3541	37860.7	1514.43
FH	4	1	9	1	Trask-Rock	Age0	165	16.116	16934.2	102.632
FH	4	1	9	1	Trask-Rock	Age1	67	16.4868	6512.72	97.2047
FH	4	1	9	1	Trask-Rock	Age2	28	21.8986	5226.5	186.661
FH	4	1	9	1	Trask-Rock	Age3Plus	25	42.2758	37958.1	1518.32
FH	5	1	9	1	Trask-Rock	Age0	163	16.3	18916.7	116.053
FH	5	1	9	1	Trask-Rock	Age1	66	20.0979	12690.2	192.276
FH	5	1	9	1	Trask-Rock	Age2	28	21.7393	7945.58	283.771
FH	5	1	9	1	Trask-Rock	Age3Plus	25	42.6725	44266.5	1770.66
FH	1	1	9	1	Trask-UM	Age0	170	16.0571	17712.7	104.192
FH	1	1	9	1	Trask-UM	Age1	67	19.7018	12427.2	185.481
FH	1	1	9	1	Trask-UM	Age2	28	23.8796	9025.24	322.33
FH	1	1	9	1	Trask-UM	Age3Plus	25	41.4799	45987.7	1839.51
FH	2	1	9	1	Trask-UM	Age0	170	15.8976	19272.8	113.369
FH	2	1	9	1	Trask-UM	Age1	66	18.1307	8824.94	133.711
FH	2	1	9	1	Trask-UM	Age2	28	28.5673	15518.5	554.233
FH	2	1	9	1	Trask-UM	Age3Plus	25	37.4855	46724.8	1868.99
FH	3	1	9	1	Trask-UM	Age0	169	16.7902	19397.3	114.777
FH	3	1	9	1	Trask-UM	Age1	65	17.1877	6939.28	106.758
FH	3	1	9	1	Trask-UM	Age2	27	26.7478	10247.2	379.525
FH	3	1	9	1	Trask-UM	Age3Plus	25	41.754	32728.9	1309.16
FH	4	1	9	1	Trask-UM	Age0	170	18.1163	23637.2	139.043
FH	4	1	9	1	Trask-UM	Age1	67	16.8815	7167.05	106.971
FH	4	1	9	1	Trask-UM	Age2	28	26.02	11616.6	414.878
FH	4	1	9	1	Trask-UM	Age3Plus	25	42.756	47763.8	1910.55
FH	5	1	9	1	Trask-UM	Age0	169	16.6475	17727.1	104.894
FH	5	1	9	1	Trask-UM	Age1	67	19.6557	10286.1	153.523
FH	5	1	9	1	Trask-UM	Age2	28	27.4058	10447.6	373.128
FH	5	1	9	1	Trask-UM	Age3Plus	25	40.259	57630.9	2305.24
CC	1	1	9	1	Trask-Pothole	Age0	167	15.9907	18020.5	107.907
CC	1	1	9	1	Trask-Pothole	Age1	66	19.7755	9946.04	150.698
CC	1	1	9	1	Trask-Pothole	Age2	28	21.9229	6786.85	242.388
CC	1	1	9	1	Trask-Pothole	Age3Plus	25	45.181	80151.1	3206.05
CC	2	1	9	1	Trask-Pothole	Age0	168	16.5609	19583	116.566
CC	2	1	9	1	Trask-Pothole	Age1	65	17.7932	8640.22	132.926
CC	2	1	9	1	Trask-Pothole	Age2	28	25.5206	11054	394.784
CC	2	1	9	1	Trask-Pothole	Age3Plus	25	37.3278	31209.5	1248.38
CC	3	1	9	1	Trask-Pothole	Age0	166	15.7311	17957.1	108.175
CC	3	1	9	1	Trask-Pothole	Age1	67	17.641	8617.4	128.618
CC	3	1	9	1	Trask-Pothole	Age2	27	26.8018	10416.3	385.788
CC	3	1	9	1	Trask-Pothole	Age3Plus	25	31.57	26852	1074.08
CC	4	1	9	1	Trask-Pothole	Age0	168	16.8784	20378.6	121.301
CC	4	1	9	1	Trask-Pothole	Age1	66	16.457	7375.4	111.748
CC	4	1	9	1	Trask-Pothole	Age2	28	22.7184	10115.3	361.26
CC	4	1	9	1	Trask-Pothole	Age3Plus	25	38.4641	30975.2	1239.01
CC	5	1	9	1	Trask-Pothole	Age0	164	15.9334	15551.5	94.8262
CC	5	1	9	1	Trask-Pothole	Age1	66	18.1399	8390.54	127.129
CC	5	1	9	1	Trask-Pothole	Age2	28	20.8172	7090.5	253.232
CC	5	1	9	1	Trask-Pothole	Age3Plus	25	40.6955	56467.8	2258.71
CC	1	1	9	1	Trask-Rock	Age0	170	16.1076	18556.5	109.156
CC	1	1	9	1	Trask-Rock	Age1	67	19.1655	9711.87	144.953
CC	1	1	9	1	Trask-Rock	Age2	28	23.8345	8280.64	295.737
CC	1	1	9	1	Trask-Rock	Age3Plus	24	46.4641	54675.4	2278.14
CC	2	1	9	1	Trask-Rock	Age0	169	16.1746	17835.4	105.535
CC	2	1	9	1	Trask-Rock	Age1	66	18.618	9239.39	139.991
CC	2	1	9	1	Trask-Rock	Age2	28	22.0112	6382.17	227.935
CC	2	1	9	1	Trask-Rock	Age3Plus	25	47.8266	61572	2462.88
CC	3	1	9	1	Trask-Rock	Age0	165	16.0718	17880.3	108.365
CC	3	1	9	1	Trask-Rock	Age1	66	20.1555	10933.9	165.666
CC	3	1	9	1	Trask-Rock	Age2	27	27.3551	12251.1	453.746
CC	3	1	9	1	Trask-Rock	Age3Plus	25	42.3541	37860.7	1514.43
CC	4	1	9	1	Trask-Rock	Age0	165	16.116	16934.2	102.632
CC	4	1	9	1	Trask-Rock	Age1	67	16.4868	6512.72	97.2047
CC	4	1	9	1	Trask-Rock	Age2	28	21.8986	5226.5	186.661
CC	4	1	9	1	Trask-Rock	Age3Plus	25	42.2758	37958.1	1518.32
CC	5	1	9	1	Trask-Rock	Age0	163	16.3	18916.7	116.053
CC	5	1	9	1	Trask-Rock	Age1	66	20.0979	12690.2	192.276
CC	5	1	9	1	Trask-Rock	Age2	28	21.7393	7945.58	283.771
CC	5	1	9	1	Trask-Rock	Age3Plus	25	42.6725	44266.5	1770.66
CC	1	1	9	1	Trask-UM	Age0	170	16.0571	17712.7	104.192
CC	1	1	9	1	Trask-UM	Age1	67	19.7018	12427.2	185.481
CC	1	1	9	1	Trask-UM	Age2	28	23.8796	9025.24	322.33
CC	1	1	9	1	Trask-UM	Age3Plus	25	41.4799	45987.7	1839.51
CC	2	1	9	1	Trask-UM	Age0	170	15.8976	19272.8	113.369
CC	2	1	9	1	Trask-UM	Age1	66	18.1307	8824.94	133.711
CC	2	1	9	1	Trask-UM	Age2	28	28.5673	15518.5	554.233
CC	2	1	9	1	Trask-UM	Age3Plus	25	37.4855	46724.8	1868.99
CC	3	1	9	1	Trask-UM	Age0	168	16.8131	18478.5	109.991
CC	3	1	9	1	Trask-UM	Age1	67	20.222	13808.6	206.099
CC	3	1	9	1	Trask-UM	Age2	28	23.7323	8127.6	290.272
CC	3	1	9	1	Trask-UM	Age3Plus	25	38.6033	57219	2288.76
CC	4	1	9	1	Trask-UM	Age0	170	18.1163	23637.2	139.043
CC	4	1	9	1	Trask-UM	Age1	67	16.8815	7167.05	106.971
CC	4	1	9	1	Trask-UM	Age2	28	26.02	11616.6	414.878
CC	4	1	9	1	Trask-UM	Age3Plus	25	42.756	47763.8	1910.55
CC	5	1	9	1	Trask-UM	Age0	170	17.1303	22004.2	129.437
CC	5	1	9	1	Trask-UM	Age1	67	19.1949	12053.9	179.909
CC	5	1	9	1	Trask-UM	Age2	28	23.0837	7302.31	260.797
CC	5	1	9	1	Trask-UM	Age3Plus	25	45.3875	56330.5	2253.22
FH+CC	1	1	9	1	Trask-Pothole	Age0	167	15.9907	18020.5	107.907
FH+CC	1	1	9	1	Trask-Pothole	Age1	66	19.7755	9946.04	150.698
FH+CC	1	1	9	1	Trask-Pothole	Age2	28	21.9229	6786.85	242.388
FH+CC	1	1	9	1	Trask-Pothole	Age3Plus	25	45.181	80151.1	3206.05
FH+CC	2	1	9	1	Trask-Pothole	Age0	168	16.5609	19583	116.566
FH+CC	2	1	9	1	Trask-Pothole	Age1	65	17.7932	8640.22	132.926
FH+CC	2	1	9	1	Trask-Pothole	Age2	28	25.5206	11054	394.784
FH+CC	2	1	9	1	Trask-Pothole	Age3Plus	25	37.3278	31209.5	1248.38
FH+CC	3	1	9	1	Trask-Pothole	Age0	166	15.7311	17957.1	108.175
FH+CC	3	1	9	1	Trask-Pothole	Age1	67	17.641	8617.4	128.618
FH+CC	3	1	9	1	Trask-Pothole	Age2	27	26.8018	10416.3	385.788
FH+CC	3	1	9	1	Trask-Pothole	Age3Plus	25	31.57	26852	1074.08
FH+CC	4	1	9	1	Trask-Pothole	Age0	168	16.8784	20378.6	121.301
FH+CC	4	1	9	1	Trask-Pothole	Age1	66	16.457	7375.4	111.748
FH+CC	4	1	9	1	Trask-Pothole	Age2	28	22.7184	10115.3	361.26
FH+CC	4	1	9	1	Trask-Pothole	Age3Plus	25	38.4641	30975.2	1239.01
FH+CC	5	1	9	1	Trask-Pothole	Age0	164	15.9334	15551.5	94.8262
FH+CC	5	1	9	1	Trask-Pothole	Age1	66	18.1399	8390.54	127.129
FH+CC	5	1	9	1	Trask-Pothole	Age2	28	20.8172	7090.5	253.232
FH+CC	5	1	9	1	Trask-Pothole	Age3Plus	25	40.6955	56467.8	2258.71
FH+CC	1	1	9	1	Trask-Rock	Age0	170	16.1076	18556.5	109.156
FH+CC	1	1	9	1	Trask-Rock	Age1	67	19.1655	9711.87	144.953
FH+CC	1	1	9	1	Trask-Rock	Age2	28	23.8345	8280.64	295.737
FH+CC	1	1	9	1	Trask-Rock	Age3Plus	24	46.4641	54675.4	2278.14
FH+CC	2	1	9	1	Trask-Rock	Age0	169	16.1746	17835.4	105.535
FH+CC	2	1	9	1	Trask-Rock	Age1	66	18.618	9239.39	139.991
FH+CC	2	1	9	1	Trask-Rock	Age2	28	22.0112	6382.17	227.935
FH+CC	2	1	9	1	Trask-Rock	Age3Plus	25	47.8266	61572	2462.88
FH+CC	3	1	9	1	Trask-Rock	Age0	165	16.0718	17880.3	108.365
FH+CC	3	1	9	1	Trask-Rock	Age1	66	20.1555	10933.9	165.666
FH+CC	3	1	9	1	Trask-Rock	Age2	27	27.3551	12251.1	453.746
FH+CC	3	1	9	1	Trask-Rock	Age3Plus	25	42.3541	37860.7	1514.43
FH+CC	4	1	9	1	Trask-Rock	Age0	165	16.116	16934.2	102.632
FH+CC	4	1	9	1	Trask-Rock	Age1	67	16.4868	6512.72	97.2047
FH+CC	4	1	9	1	Trask-Rock	Age2	28	21.8986	5226.5	186.661
FH+CC	4	1	9	1	Trask-Rock	Age3Plus	25	42.2758	37958.1	1518.32
FH+CC	5	1	9	1	Trask-Rock	Age0	163	16.3	18916.7	116.053
FH+CC	5	1	9	1	Trask-Rock	Age1	66	20.0979	12690.2	192.276
FH+CC	5	1	9	1	Trask-Rock	Age2	28	21.7393	7945.58	283.771
FH+CC	5	1	9	1	Trask-Rock	Age3Plus	25	42.6725	44266.5	1770.66
FH+CC	1	1	9	1	Trask-UM	Age0	170	16.0571	17712.7	104.192
FH+CC	1	1	9	1	Trask-UM	Age1	67	19.7018	12427.2	185.481
FH+CC	1	1	9	1	Trask-UM	Age2	28	23.8796	9025.24	322.33
FH+CC	1	1	9	1	Trask-UM	Age3Plus	25	41.4799	45987.7	1839.51
FH+CC	2	1	9	1	Trask-UM	Age0	170	15.8976	19272.8	113.369
FH+CC	2	1	9	1	Trask-UM	Age1	66	18.1307	8824.94	133.711
FH+CC	2	1	9	1	Trask-UM	Age2	28	28.5673	15518.5	554.233
FH+CC	2	1	9	1	Trask-UM	Age3Plus	25	37.4855	46724.8	1868.99
FH+CC	3	1	9	1	Trask-UM	Age0	168	16.8131	18478.5	109.991
FH+CC	3	1	9	1	Trask-UM	Age1	67	20.222	13808.6	206.099
FH+CC	3	1	9	1	Trask-UM	Age2	28	23.7323	8127.6	290.272
FH+CC	3	1	9	1	Trask-UM	Age3Plus	25	38.6033	57219	2288.76
FH+CC	4	1	9	1	Trask-UM	Age0	169	16.7902	19397.3	114.777
FH+CC	4	1	9	1	Trask-UM	Age1	65	17.1877	6939.28	106.758
FH+CC	4	1	9	1	Trask-UM	Age2	27	26.7478	10247.2	379.525
FH+CC	4	1	9	1	Trask-UM	Age3Plus	25	41.754	32728.9	1309.16
FH+CC	5	1	9	1	Trask-UM	Age0	170	18.1163	23637.2	139.043
FH+CC	5	1	9	1	Trask-UM	Age1	67	16.8815	7167.05	106.971
FH+CC	5	1	9	1	Trask-UM	Age2	28	26.02	11616.6	414.878
FH+CC	5	1	9	1	Trask-UM	Age3Plus	25	42.756	47763.8	1910.55
baseline	1	7	9	1	Trask-Gus	Age0	166	5.08497	282.813	1.70369
baseline	1	7	9	1	Trask-Gus	Age1	24	18.7886	1705.17	71.0486
baseline	1	7	9	1	Trask-Gus	Age2	2	24.9643	363.462	181.731
baseline	1	7	9	1	Trask-Gus	Age3Plus	1	34.6083	470.45	470.45
baseline	2	7	9	1	Trask-Gus	Age0	175	5.21342	327.427	1.87101
baseline	2	7	9	1	Trask-Gus	Age1	19	18.0315	1168.37	61.4932
baseline	2	7	9	1	Trask-Gus	Age2	5	24.6411	829.194	165.839
baseline	2	7	9	1	Trask-Gus	Age3Plus	3	31.9309	1110.99	370.329
baseline	3	7	9	1	Trask-Gus	Age0	212	5.13056	371.098	1.75046
baseline	3	7	9	1	Trask-Gus	Age1	13	16.6878	667.035	51.3104
baseline	3	7	9	1	Trask-Gus	Age2	6	28.0447	1361.03	226.838
baseline	3	7	9	1	Trask-Gus	Age3Plus	3	33.7746	1327.32	442.44
baseline	4	7	9	1	Trask-Gus	Age0	96	5.47898	207.95	2.16615
baseline	4	7	9	1	Trask-Gus	Age1	15	17.6504	877.602	58.5068
baseline	4	7	9	1	Trask-Gus	Age2	2	25.5656	355.284	177.642
baseline	4	7	9	1	Trask-Gus	Age3Plus	5	34.3979	2185.06	437.013
baseline	5	7	9	1	Trask-Gus	Age0	202	5.30013	390.579	1.93356
baseline	5	7	9	1	Trask-Gus	Age1	13	17.3428	737.384	56.7218
baseline	5	7	9	1	Trask-Gus	Age2	2	23.8916	301.345	150.672
baseline	5	7	9	1	Trask-Gus	Age3Plus	5	39.7162	3451.14	690.228
FH	1	7	9	1	Trask-Gus	Age0	131	5.62801	323.165	2.46691
FH	1	7	9	1	Trask-Gus	Age1	13	17.6358	778.789	59.9069
FH	1	7	9	1	Trask-Gus	Age2	4	24.328	614.111	153.528
FH	1	7	9	1	Trask-Gus	Age3Plus	8	32.5695	3470.81	433.851
FH	2	7	9	1	Trask-Gus	Age0	172	5.14808	309.408	1.79889
FH	2	7	9	1	Trask-Gus	Age1	19	18.0144	1189.46	62.6032
FH	2	7	9	1	Trask-Gus	Age2	2	23.3066	277.096	138.548
FH	2	7	9	1	Trask-Gus	Age3Plus	7	32.1497	2668.41	381.202
FH	3	7	9	1	Trask-Gus	Age0	132	5.3177	258.517	1.95846
FH	3	7	9	1	Trask-Gus	Age1	18	17.8326	1102.53	61.2518
FH	3	7	9	1	Trask-Gus	Age2	6	25.6957	1104.93	184.155
FH	3	7	9	1	Trask-Gus	Age3Plus	5	36.3786	2777.39	555.478
FH	4	7	9	1	Trask-Gus	Age0	113	5.27568	219.17	1.93956
FH	4	7	9	1	Trask-Gus	Age1	22	18.4902	1474.14	67.0063
FH	4	7	9	1	Trask-Gus	Age2	5	25.584	917.604	183.521
FH	4	7	9	1	Trask-Gus	Age3Plus	5	36.6894	2758.76	551.752
FH	5	7	9	1	Trask-Gus	Age0	112	5.33229	226.853	2.02548
FH	5	7	9	1	Trask-Gus	Age1	11	17.0352	618.261	56.2055
FH	5	7	9	1	Trask-Gus	Age2	4	25.5301	706.498	176.624
FH	5	7	9	1	Trask-Gus	Age3Plus	5	39.0011	3369.77	673.953
CC	1	7	9	1	Trask-Gus	Age0	125	6.3787	447.571	3.58057
CC	1	7	9	1	Trask-Gus	Age1	12	19.0366	864.629	72.0524
CC	1	7	9	1	Trask-Gus	Age2	1	24.6758	162.285	162.285
CC	1	7	9	1	Trask-Gus	Age3Plus	3	34.492	1299.85	433.282
CC	2	7	9	1	Trask-Gus	Age0	110	6.37244	390.577	3.5507
CC	2	7	9	1	Trask-Gus	Age1	10	18.4461	616.39	61.639
CC	2	7	9	1	Trask-Gus	Age2	4	22.9779	521.011	130.253
CC	2	7	9	1	Trask-Gus	Age3Plus	5	35.8149	2456.17	491.235
CC	3	7	9	1	Trask-Gus	Age0	76	6.0079	214.009	2.81591
CC	3	7	9	1	Trask-Gus	Age1	17	19.3616	1205.24	70.8964
CC	3	7	9	1	Trask-Gus	Age2	3	22.2733	349.204	116.401
CC	3	7	9	1	Trask-Gus	Age3Plus	5	34.6553	2163.55	432.709
CC	4	7	9	1	Trask-Gus	Age0	111	5.95462	324.106	2.91988
CC	4	7	9	1	Trask-Gus	Age1	8	18.6066	503.939	62.9924
CC	4	7	9	1	Trask-Gus	Age2	5	23.0695	608.614	121.723
CC	4	7	9	1	Trask-Gus	Age3Plus	6	36.0912	2860.81	476.802
CC	5	7	9	1	Trask-Gus	Age0	90	5.86207	236.777	2.63085
CC	5	7	9	1	Trask-Gus	Age1	15	20.2977	1227.65	81.8434
CC	5	7	9	1	Trask-Gus	Age2	2	24.2945	302.889	151.444
CC	5	7	9	1	Trask-Gus	Age3Plus	4	34.0399	1767.1	441.775
FH+CC	1	7	9	1	Trask-Gus	Age0	57	6.23569	197.309	3.46156
FH+CC	1	7	9	1	Trask-Gus	Age1	21	21.243	2035.83	96.9444
FH+CC	1	7	9	1	Trask-Gus	Age2	2	23.2921	276.467	138.234
FH+CC	1	7	9	1	Trask-Gus	Age3Plus	4	35.1743	1929.21	482.303
FH+CC	2	7	9	1	Trask-Gus	Age0	69	6.35938	252.382	3.6577
FH+CC	2	7	9	1	Trask-Gus	Age1	20	20.2635	1703.46	85.1729
FH+CC	2	7	9	1	Trask-Gus	Age2	2	25.5156	372.839	186.419
FH+CC	2	7	9	1	Trask-Gus	Age3Plus	3	33.8554	1350.81	450.27
FH+CC	3	7	9	1	Trask-Gus	Age0	92	7.07472	473.273	5.14427
FH+CC	3	7	9	1	Trask-Gus	Age1	12	19.5169	929.651	77.4709
FH+CC	3	7	9	1	Trask-Gus	Age2	3	23.3492	417.376	139.125
FH+CC	3	7	9	1	Trask-Gus	Age3Plus	5	33.1911	2068.64	413.728
FH+CC	4	7	9	1	Trask-Gus	Age0	136	6.79153	630.047	4.6327
FH+CC	4	7	9	1	Trask-Gus	Age1	7	17.6511	414.361	59.1945
FH+CC	4	7	9	1	Trask-Gus	Age2	5	26.7716	1019.48	203.896
FH+CC	4	7	9	1	Trask-Gus	Age3Plus	3	33.8502	1285.7	428.567
FH+CC	5	7	9	1	Trask-Gus	Age0	125	6.23058	446.45	3.5716
FH+CC	5	7	9	1	Trask-Gus	Age1	8	17.944	481.455	60.1819
FH+CC	5	7	9	1	Trask-Gus	Age2	10	27.4173	2332.24	233.224
FH+CC	5	7	9	1	Trask-Gus	Age3Plus	0	0	0	0
baseline	1	1	10	1	Trask-Pothole	Age0	98	19.3207	13696	139.755
baseline	1	1	10	1	Trask-Pothole	Age1	47	23.1013	8645.71	183.951
baseline	1	1	10	1	Trask-Pothole	Age2	20	24.097	5476.34	273.817
baseline	1	1	10	1	Trask-Pothole	Age3Plus	19	54.634	76412	4021.68
baseline	2	1	10	1	Trask-Pothole	Age0	102	19.6671	15405.6	151.035
baseline	2	1	10	1	Trask-Pothole	Age1	39	20.8531	6915.78	177.328
baseline	2	1	10	1	Trask-Pothole	Age2	14	32.6279	6988.75	499.196
baseline	2	1	10	1	Trask-Pothole	Age3Plus	20	35.3732	18665.3	933.267
baseline	3	1	10	1	Trask-Pothole	Age0	90	19.263	13382.5	148.694
baseline	3	1	10	1	Trask-Pothole	Age1	38	22.4185	7200.67	189.491
baseline	3	1	10	1	Trask-Pothole	Age2	19	29.1445	7866.21	414.011
baseline	3	1	10	1	Trask-Pothole	Age3Plus	22	33.695	25224.8	1146.58
baseline	4	1	10	1	Trask-Pothole	Age0	109	20.4219	17459.8	160.182
baseline	4	1	10	1	Trask-Pothole	Age1	36	20.5353	5213.97	144.833
baseline	4	1	10	1	Trask-Pothole	Age2	13	29.6258	6469.27	497.636
baseline	4	1	10	1	Trask-Pothole	Age3Plus	20	36.6249	22765.9	1138.3
baseline	5	1	10	1	Trask-Pothole	Age0	107	19.001	13038.8	121.858
baseline	5	1	10	1	Trask-Pothole	Age1	38	22.1304	6110.62	160.806
baseline	5	1	10	1	Trask-Pothole	Age2	15	27.2442	5456.73	363.782
baseline	5	1	10	1	Trask-Pothole	Age3Plus	19	42.131	40243.4	2118.07
baseline	1	1	10	1	Trask-Rock	Age0	97	20.2778	14832.5	152.913
baseline	1	1	10	1	Trask-Rock	Age1	48	21.4548	8017.74	167.036
baseline	1	1	10	1	Trask-Rock	Age2	19	27.4173	6848.63	360.454
baseline	1	1	10	1	Trask-Rock	Age3Plus	20	52.6664	51473.1	2573.65
baseline	2	1	10	1	Trask-Rock	Age0	97	19.6917	13129.1	135.352
baseline	2	1	10	1	Trask-Rock	Age1	38	23.1165	7609.62	200.253
baseline	2	1	10	1	Trask-Rock	Age2	22	23.6624	5243.3	238.332
baseline	2	1	10	1	Trask-Rock	Age3Plus	18	50.9694	43134.8	2396.38
baseline	3	1	10	1	Trask-Rock	Age0	93	20.1707	13434.3	144.455
baseline	3	1	10	1	Trask-Rock	Age1	41	22.6632	6983.76	170.336
baseline	3	1	10	1	Trask-Rock	Age2	24	27.6347	9979.74	415.823
baseline	3	1	10	1	Trask-Rock	Age3Plus	22	46.1603	35535.2	1615.24
baseline	4	1	10	1	Trask-Rock	Age0	97	19.6131	13545.9	139.649
baseline	4	1	10	1	Trask-Rock	Age1	41	19.6629	5032.37	122.741
baseline	4	1	10	1	Trask-Rock	Age2	22	22.1791	3796.28	172.558
baseline	4	1	10	1	Trask-Rock	Age3Plus	19	42.461	24974.9	1314.47
baseline	5	1	10	1	Trask-Rock	Age0	101	19.8477	15539.5	153.857
baseline	5	1	10	1	Trask-Rock	Age1	43	23.0237	9202.91	214.021
baseline	5	1	10	1	Trask-Rock	Age2	21	24.692	6613.55	314.931
baseline	5	1	10	1	Trask-Rock	Age3Plus	20	43.3054	36495.7	1824.78
baseline	1	1	10	1	Trask-UM	Age0	144	17.0219	14978.5	104.017
baseline	1	1	10	1	Trask-UM	Age1	55	20.9025	10079.9	183.272
baseline	1	1	10	1	Trask-UM	Age2	27	24.2344	8357.74	309.546
baseline	1	1	10	1	Trask-UM	Age3Plus	21	40.6894	38507.8	1833.71
baseline	2	1	10	1	Trask-UM	Age0	138	17.0391	15298.2	110.857
baseline	2	1	10	1	Trask-UM	Age1	54	18.3105	6876.38	127.34
baseline	2	1	10	1	Trask-UM	Age2	23	28.9029	9810.61	426.548
baseline	2	1	10	1	Trask-UM	Age3Plus	18	34.3833	31146.1	1730.34
baseline	3	1	10	1	Trask-UM	Age0	135	17.1311	13501.9	100.014
baseline	3	1	10	1	Trask-UM	Age1	60	21.2726	12430.7	207.178
baseline	3	1	10	1	Trask-UM	Age2	25	25.1826	7437.14	297.486
baseline	3	1	10	1	Trask-UM	Age3Plus	23	36.7035	39968.8	1737.77
baseline	4	1	10	1	Trask-UM	Age0	135	19.2742	19101.2	141.49
baseline	4	1	10	1	Trask-UM	Age1	60	17.5067	6047.82	100.797
baseline	4	1	10	1	Trask-UM	Age2	21	25.4493	6620.44	315.259
baseline	4	1	10	1	Trask-UM	Age3Plus	22	39.4434	24380.8	1108.22
baseline	5	1	10	1	Trask-UM	Age0	139	17.8435	17237.1	124.008
baseline	5	1	10	1	Trask-UM	Age1	58	19.2942	9668.01	166.69
baseline	5	1	10	1	Trask-UM	Age2	25	24.1109	6605.26	264.21
baseline	5	1	10	1	Trask-UM	Age3Plus	20	41.3669	32442.5	1622.12
FH	1	1	10	1	Trask-Pothole	Age0	98	19.3207	13696	139.755
FH	1	1	10	1	Trask-Pothole	Age1	47	23.1013	8645.71	183.951
FH	1	1	10	1	Trask-Pothole	Age2	20	24.097	5476.34	273.817
FH	1	1	10	1	Trask-Pothole	Age3Plus	19	54.634	76412	4021.68
FH	2	1	10	1	Trask-Pothole	Age0	102	19.6671	15405.6	151.035
FH	2	1	10	1	Trask-Pothole	Age1	39	20.8531	6915.78	177.328
FH	2	1	10	1	Trask-Pothole	Age2	14	32.6279	6988.75	499.196
FH	2	1	10	1	Trask-Pothole	Age3Plus	20	35.3732	18665.3	933.267
FH	3	1	10	1	Trask-Pothole	Age0	90	19.263	13382.5	148.694
FH	3	1	10	1	Trask-Pothole	Age1	38	22.4185	7200.67	189.491
FH	3	1	10	1	Trask-Pothole	Age2	19	29.1445	7866.21	414.011
FH	3	1	10	1	Trask-Pothole	Age3Plus	22	33.695	25224.8	1146.58
FH	4	1	10	1	Trask-Pothole	Age0	109	20.4219	17459.8	160.182
FH	4	1	10	1	Trask-Pothole	Age1	36	20.5353	5213.97	144.833
FH	4	1	10	1	Trask-Pothole	Age2	13	29.6258	6469.27	497.636
FH	4	1	10	1	Trask-Pothole	Age3Plus	20	36.6249	22765.9	1138.3
FH	5	1	10	1	Trask-Pothole	Age0	107	19.001	13038.8	121.858
FH	5	1	10	1	Trask-Pothole	Age1	38	22.1304	6110.62	160.806
FH	5	1	10	1	Trask-Pothole	Age2	15	27.2442	5456.73	363.782
FH	5	1	10	1	Trask-Pothole	Age3Plus	19	42.131	40243.4	2118.07
FH	1	1	10	1	Trask-Rock	Age0	97	20.2778	14832.5	152.913
FH	1	1	10	1	Trask-Rock	Age1	48	21.4548	8017.74	167.036
FH	1	1	10	1	Trask-Rock	Age2	19	27.4173	6848.63	360.454
FH	1	1	10	1	Trask-Rock	Age3Plus	20	52.6664	51473.1	2573.65
FH	2	1	10	1	Trask-Rock	Age0	97	19.6917	13129.1	135.352
FH	2	1	10	1	Trask-Rock	Age1	38	23.1165	7609.62	200.253
FH	2	1	10	1	Trask-Rock	Age2	22	23.6624	5243.3	238.332
FH	2	1	10	1	Trask-Rock	Age3Plus	18	50.9694	43134.8	2396.38
FH	3	1	10	1	Trask-Rock	Age0	93	20.1707	13434.3	144.455
FH	3	1	10	1	Trask-Rock	Age1	41	22.6632	6983.76	170.336
FH	3	1	10	1	Trask-Rock	Age2	24	27.6347	9979.74	415.823
FH	3	1	10	1	Trask-Rock	Age3Plus	22	46.1603	35535.2	1615.24
FH	4	1	10	1	Trask-Rock	Age0	97	19.6131	13545.9	139.649
FH	4	1	10	1	Trask-Rock	Age1	41	19.6629	5032.37	122.741
FH	4	1	10	1	Trask-Rock	Age2	22	22.1791	3796.28	172.558
FH	4	1	10	1	Trask-Rock	Age3Plus	19	42.461	24974.9	1314.47
FH	5	1	10	1	Trask-Rock	Age0	101	19.8477	15539.5	153.857
FH	5	1	10	1	Trask-Rock	Age1	43	23.0237	9202.91	214.021
FH	5	1	10	1	Trask-Rock	Age2	21	24.692	6613.55	314.931
FH	5	1	10	1	Trask-Rock	Age3Plus	20	43.3054	36495.7	1824.78
FH	1	1	10	1	Trask-UM	Age0	144	17.0219	14978.5	104.017
FH	1	1	10	1	Trask-UM	Age1	55	20.9025	10079.9	183.272
FH	1	1	10	1	Trask-UM	Age2	27	24.2344	8357.74	309.546
FH	1	1	10	1	Trask-UM	Age3Plus	21	40.6894	38507.8	1833.71
FH	2	1	10	1	Trask-UM	Age0	138	17.0391	15298.2	110.857
FH	2	1	10	1	Trask-UM	Age1	54	18.3105	6876.38	127.34
FH	2	1	10	1	Trask-UM	Age2	23	28.9029	9810.61	426.548
FH	2	1	10	1	Trask-UM	Age3Plus	18	34.3833	31146.1	1730.34
FH	3	1	10	1	Trask-UM	Age0	134	17.0828	13561.1	101.203
FH	3	1	10	1	Trask-UM	Age1	53	17.8365	5785.51	109.161
FH	3	1	10	1	Trask-UM	Age2	25	28.2238	9505.14	380.206
FH	3	1	10	1	Trask-UM	Age3Plus	22	41.356	27919.6	1269.07
FH	4	1	10	1	Trask-UM	Age0	135	19.2742	19101.2	141.49
FH	4	1	10	1	Trask-UM	Age1	60	17.5067	6047.82	100.797
FH	4	1	10	1	Trask-UM	Age2	21	25.4493	6620.44	315.259
FH	4	1	10	1	Trask-UM	Age3Plus	22	39.4434	24380.8	1108.22
FH	5	1	10	1	Trask-UM	Age0	140	17.5031	14730	105.214
FH	5	1	10	1	Trask-UM	Age1	56	20.0353	8247.71	147.281
FH	5	1	10	1	Trask-UM	Age2	26	27.8724	9311.22	358.124
FH	5	1	10	1	Trask-UM	Age3Plus	18	34.7217	17949.2	997.175
CC	1	1	10	1	Trask-Pothole	Age0	98	19.3207	13696	139.755
CC	1	1	10	1	Trask-Pothole	Age1	47	23.1013	8645.71	183.951
CC	1	1	10	1	Trask-Pothole	Age2	20	24.097	5476.34	273.817
CC	1	1	10	1	Trask-Pothole	Age3Plus	19	54.634	76412	4021.68
CC	2	1	10	1	Trask-Pothole	Age0	102	19.6671	15405.6	151.035
CC	2	1	10	1	Trask-Pothole	Age1	39	20.8531	6915.78	177.328
CC	2	1	10	1	Trask-Pothole	Age2	14	32.6279	6988.75	499.196
CC	2	1	10	1	Trask-Pothole	Age3Plus	20	35.3732	18665.3	933.267
CC	3	1	10	1	Trask-Pothole	Age0	90	19.263	13382.5	148.694
CC	3	1	10	1	Trask-Pothole	Age1	38	22.4185	7200.67	189.491
CC	3	1	10	1	Trask-Pothole	Age2	19	29.1445	7866.21	414.011
CC	3	1	10	1	Trask-Pothole	Age3Plus	22	33.695	25224.8	1146.58
CC	4	1	10	1	Trask-Pothole	Age0	109	20.4219	17459.8	160.182
CC	4	1	10	1	Trask-Pothole	Age1	36	20.5353	5213.97	144.833
CC	4	1	10	1	Trask-Pothole	Age2	13	29.6258	6469.27	497.636
CC	4	1	10	1	Trask-Pothole	Age3Plus	20	36.6249	22765.9	1138.3
CC	5	1	10	1	Trask-Pothole	Age0	107	19.001	13038.8	121.858
CC	5	1	10	1	Trask-Pothole	Age1	38	22.1304	6110.62	160.806
CC	5	1	10	1	Trask-Pothole	Age2	15	27.2442	5456.73	363.782
CC	5	1	10	1	Trask-Pothole	Age3Plus	19	42.131	40243.4	2118.07
CC	1	1	10	1	Trask-Rock	Age0	97	20.2778	14832.5	152.913
CC	1	1	10	1	Trask-Rock	Age1	48	21.4548	8017.74	167.036
CC	1	1	10	1	Trask-Rock	Age2	19	27.4173	6848.63	360.454
CC	1	1	10	1	Trask-Rock	Age3Plus	20	52.6664	51473.1	2573.65
CC	2	1	10	1	Trask-Rock	Age0	97	19.6917	13129.1	135.352
CC	2	1	10	1	Trask-Rock	Age1	38	23.1165	7609.62	200.253
CC	2	1	10	1	Trask-Rock	Age2	22	23.6624	5243.3	238.332
CC	2	1	10	1	Trask-Rock	Age3Plus	18	50.9694	43134.8	2396.38
CC	3	1	10	1	Trask-Rock	Age0	93	20.1707	13434.3	144.455
CC	3	1	10	1	Trask-Rock	Age1	41	22.6632	6983.76	170.336
CC	3	1	10	1	Trask-Rock	Age2	24	27.6347	9979.74	415.823
CC	3	1	10	1	Trask-Rock	Age3Plus	22	46.1603	35535.2	1615.24
CC	4	1	10	1	Trask-Rock	Age0	97	19.6131	13545.9	139.649
CC	4	1	10	1	Trask-Rock	Age1	41	19.6629	5032.37	122.741
CC	4	1	10	1	Trask-Rock	Age2	22	22.1791	3796.28	172.558
CC	4	1	10	1	Trask-Rock	Age3Plus	19	42.461	24974.9	1314.47
CC	5	1	10	1	Trask-Rock	Age0	101	19.8477	15539.5	153.857
CC	5	1	10	1	Trask-Rock	Age1	43	23.0237	9202.91	214.021
CC	5	1	10	1	Trask-Rock	Age2	21	24.692	6613.55	314.931
CC	5	1	10	1	Trask-Rock	Age3Plus	20	43.3054	36495.7	1824.78
CC	1	1	10	1	Trask-UM	Age0	144	17.0219	14978.5	104.017
CC	1	1	10	1	Trask-UM	Age1	55	20.9025	10079.9	183.272
CC	1	1	10	1	Trask-UM	Age2	27	24.2344	8357.74	309.546
CC	1	1	10	1	Trask-UM	Age3Plus	21	40.6894	38507.8	1833.71
CC	2	1	10	1	Trask-UM	Age0	138	17.0391	15298.2	110.857
CC	2	1	10	1	Trask-UM	Age1	54	18.3105	6876.38	127.34
CC	2	1	10	1	Trask-UM	Age2	23	28.9029	9810.61	426.548
CC	2	1	10	1	Trask-UM	Age3Plus	18	34.3833	31146.1	1730.34
CC	3	1	10	1	Trask-UM	Age0	135	17.1311	13501.9	100.014
CC	3	1	10	1	Trask-UM	Age1	60	21.2726	12430.7	207.178
CC	3	1	10	1	Trask-UM	Age2	25	25.1826	7437.14	297.486
CC	3	1	10	1	Trask-UM	Age3Plus	23	36.7035	39968.8	1737.77
CC	4	1	10	1	Trask-UM	Age0	135	19.2742	19101.2	141.49
CC	4	1	10	1	Trask-UM	Age1	60	17.5067	6047.82	100.797
CC	4	1	10	1	Trask-UM	Age2	21	25.4493	6620.44	315.259
CC	4	1	10	1	Trask-UM	Age3Plus	22	39.4434	24380.8	1108.22
CC	5	1	10	1	Trask-UM	Age0	139	17.8435	17237.1	124.008
CC	5	1	10	1	Trask-UM	Age1	58	19.2942	9668.01	166.69
CC	5	1	10	1	Trask-UM	Age2	25	24.1109	6605.26	264.21
CC	5	1	10	1	Trask-UM	Age3Plus	20	41.3669	32442.5	1622.12
FH+CC	1	1	10	1	Trask-Pothole	Age0	98	19.3207	13696	139.755
FH+CC	1	1	10	1	Trask-Pothole	Age1	47	23.1013	8645.71	183.951
FH+CC	1	1	10	1	Trask-Pothole	Age2	20	24.097	5476.34	273.817
FH+CC	1	1	10	1	Trask-Pothole	Age3Plus	19	54.634	76412	4021.68
FH+CC	2	1	10	1	Trask-Pothole	Age0	102	19.6671	15405.6	151.035
FH+CC	2	1	10	1	Trask-Pothole	Age1	39	20.8531	6915.78	177.328
FH+CC	2	1	10	1	Trask-Pothole	Age2	14	32.6279	6988.75	499.196
FH+CC	2	1	10	1	Trask-Pothole	Age3Plus	20	35.3732	18665.3	933.267
FH+CC	3	1	10	1	Trask-Pothole	Age0	90	19.263	13382.5	148.694
FH+CC	3	1	10	1	Trask-Pothole	Age1	38	22.4185	7200.67	189.491
FH+CC	3	1	10	1	Trask-Pothole	Age2	19	29.1445	7866.21	414.011
FH+CC	3	1	10	1	Trask-Pothole	Age3Plus	22	33.695	25224.8	1146.58
FH+CC	4	1	10	1	Trask-Pothole	Age0	109	20.4219	17459.8	160.182
FH+CC	4	1	10	1	Trask-Pothole	Age1	36	20.5353	5213.97	144.833
FH+CC	4	1	10	1	Trask-Pothole	Age2	13	29.6258	6469.27	497.636
FH+CC	4	1	10	1	Trask-Pothole	Age3Plus	20	36.6249	22765.9	1138.3
FH+CC	5	1	10	1	Trask-Pothole	Age0	107	19.001	13038.8	121.858
FH+CC	5	1	10	1	Trask-Pothole	Age1	38	22.1304	6110.62	160.806
FH+CC	5	1	10	1	Trask-Pothole	Age2	15	27.2442	5456.73	363.782
FH+CC	5	1	10	1	Trask-Pothole	Age3Plus	19	42.131	40243.4	2118.07
FH+CC	1	1	10	1	Trask-Rock	Age0	97	20.2778	14832.5	152.913
FH+CC	1	1	10	1	Trask-Rock	Age1	48	21.4548	8017.74	167.036
FH+CC	1	1	10	1	Trask-Rock	Age2	19	27.4173	6848.63	360.454
FH+CC	1	1	10	1	Trask-Rock	Age3Plus	20	52.6664	51473.1	2573.65
FH+CC	2	1	10	1	Trask-Rock	Age0	97	19.6917	13129.1	135.352
FH+CC	2	1	10	1	Trask-Rock	Age1	38	23.1165	7609.62	200.253
FH+CC	2	1	10	1	Trask-Rock	Age2	22	23.6624	5243.3	238.332
FH+CC	2	1	10	1	Trask-Rock	Age3Plus	18	50.9694	43134.8	2396.38
FH+CC	3	1	10	1	Trask-Rock	Age0	93	20.1707	13434.3	144.455
FH+CC	3	1	10	1	Trask-Rock	Age1	41	22.6632	6983.76	170.336
FH+CC	3	1	10	1	Trask-Rock	Age2	24	27.6347	9979.74	415.823
FH+CC	3	1	10	1	Trask-Rock	Age3Plus	22	46.1603	35535.2	1615.24
FH+CC	4	1	10	1	Trask-Rock	Age0	97	19.6131	13545.9	139.649
FH+CC	4	1	10	1	Trask-Rock	Age1	41	19.6629	5032.37	122.741
FH+CC	4	1	10	1	Trask-Rock	Age2	22	22.1791	3796.28	172.558
FH+CC	4	1	10	1	Trask-Rock	Age3Plus	19	42.461	24974.9	1314.47
FH+CC	5	1	10	1	Trask-Rock	Age0	101	19.8477	15539.5	153.857
FH+CC	5	1	10	1	Trask-Rock	Age1	43	23.0237	9202.91	214.021
FH+CC	5	1	10	1	Trask-Rock	Age2	21	24.692	6613.55	314.931
FH+CC	5	1	10	1	Trask-Rock	Age3Plus	20	43.3054	36495.7	1824.78
FH+CC	1	1	10	1	Trask-UM	Age0	144	17.0219	14978.5	104.017
FH+CC	1	1	10	1	Trask-UM	Age1	55	20.9025	10079.9	183.272
FH+CC	1	1	10	1	Trask-UM	Age2	27	24.2344	8357.74	309.546
FH+CC	1	1	10	1	Trask-UM	Age3Plus	21	40.6894	38507.8	1833.71
FH+CC	2	1	10	1	Trask-UM	Age0	138	17.0391	15298.2	110.857
FH+CC	2	1	10	1	Trask-UM	Age1	54	18.3105	6876.38	127.34
FH+CC	2	1	10	1	Trask-UM	Age2	23	28.9029	9810.61	426.548
FH+CC	2	1	10	1	Trask-UM	Age3Plus	18	34.3833	31146.1	1730.34
FH+CC	3	1	10	1	Trask-UM	Age0	135	17.1311	13501.9	100.014
FH+CC	3	1	10	1	Trask-UM	Age1	60	21.2726	12430.7	207.178
FH+CC	3	1	10	1	Trask-UM	Age2	25	25.1826	7437.14	297.486
FH+CC	3	1	10	1	Trask-UM	Age3Plus	23	36.7035	39968.8	1737.77
FH+CC	4	1	10	1	Trask-UM	Age0	134	17.0828	13561.1	101.203
FH+CC	4	1	10	1	Trask-UM	Age1	53	17.8365	5785.51	109.161
FH+CC	4	1	10	1	Trask-UM	Age2	25	28.2238	9505.14	380.206
FH+CC	4	1	10	1	Trask-UM	Age3Plus	22	41.356	27919.6	1269.07
FH+CC	5	1	10	1	Trask-UM	Age0	135	19.2742	19101.2	141.49
FH+CC	5	1	10	1	Trask-UM	Age1	60	17.5067	6047.82	100.797
FH+CC	5	1	10	1	Trask-UM	Age2	21	25.4493	6620.44	315.259
FH+CC	5	1	10	1	Trask-UM	Age3Plus	22	39.4434	24380.8	1108.22
baseline	1	7	10	1	Trask-Gus	Age0	60	6.27272	184.161	3.06934
baseline	1	7	10	1	Trask-Gus	Age1	20	18.8128	1430.02	71.501
baseline	1	7	10	1	Trask-Gus	Age2	1	26.0619	205.645	205.645
baseline	1	7	10	1	Trask-Gus	Age3Plus	1	34.6083	474.365	474.365
baseline	2	7	10	1	Trask-Gus	Age0	67	6.31848	213.683	3.1893
baseline	2	7	10	1	Trask-Gus	Age1	12	18.1027	721.341	60.1117
baseline	2	7	10	1	Trask-Gus	Age2	3	24.6339	491.729	163.91
baseline	2	7	10	1	Trask-Gus	Age3Plus	3	31.9309	1123.71	374.571
baseline	3	7	10	1	Trask-Gus	Age0	82	6.30067	254.275	3.10091
baseline	3	7	10	1	Trask-Gus	Age1	13	16.6878	645.166	49.6282
baseline	3	7	10	1	Trask-Gus	Age2	5	28.0844	1124.41	224.883
baseline	3	7	10	1	Trask-Gus	Age3Plus	3	33.7746	1317.63	439.21
baseline	4	7	10	1	Trask-Gus	Age0	36	6.36672	119.202	3.31116
baseline	4	7	10	1	Trask-Gus	Age1	12	17.6511	679.505	56.6254
baseline	4	7	10	1	Trask-Gus	Age2	2	25.5656	341.18	170.59
baseline	4	7	10	1	Trask-Gus	Age3Plus	4	34.618	1795.8	448.951
baseline	5	7	10	1	Trask-Gus	Age0	88	6.41496	289.367	3.28826
baseline	5	7	10	1	Trask-Gus	Age1	13	17.3428	713.044	54.8495
baseline	5	7	10	1	Trask-Gus	Age2	2	23.8916	289.921	144.96
baseline	5	7	10	1	Trask-Gus	Age3Plus	5	39.7162	3337.58	667.517
FH	1	7	10	1	Trask-Gus	Age0	55	6.5778	211.859	3.85198
FH	1	7	10	1	Trask-Gus	Age1	11	17.6243	624.177	56.7434
FH	1	7	10	1	Trask-Gus	Age2	3	24.387	445.458	148.486
FH	1	7	10	1	Trask-Gus	Age3Plus	7	32.941	3090.49	441.499
FH	2	7	10	1	Trask-Gus	Age0	68	6.37211	220.455	3.24199
FH	2	7	10	1	Trask-Gus	Age1	15	18.0389	905.456	60.3637
FH	2	7	10	1	Trask-Gus	Age2	1	23.3103	133.784	133.784
FH	2	7	10	1	Trask-Gus	Age3Plus	6	33.6252	2483.75	413.958
FH	3	7	10	1	Trask-Gus	Age0	53	6.18914	159.612	3.01154
FH	3	7	10	1	Trask-Gus	Age1	15	17.7588	871.797	58.1198
FH	3	7	10	1	Trask-Gus	Age2	4	24.8953	645.874	161.469
FH	3	7	10	1	Trask-Gus	Age3Plus	4	34.7327	1927.72	481.93
FH	4	7	10	1	Trask-Gus	Age0	38	6.50962	130.886	3.44436
FH	4	7	10	1	Trask-Gus	Age1	18	18.5855	1158.37	64.3537
FH	4	7	10	1	Trask-Gus	Age2	4	25.4031	693.958	173.49
FH	4	7	10	1	Trask-Gus	Age3Plus	5	36.6894	2679.69	535.938
FH	5	7	10	1	Trask-Gus	Age0	58	6.25243	185.489	3.19808
FH	5	7	10	1	Trask-Gus	Age1	11	17.0352	591.985	53.8168
FH	5	7	10	1	Trask-Gus	Age2	3	24.9307	468.257	156.086
FH	5	7	10	1	Trask-Gus	Age3Plus	4	37.8183	2464.78	616.196
CC	1	7	10	1	Trask-Gus	Age0	76	7.33172	398.118	5.2384
CC	1	7	10	1	Trask-Gus	Age1	11	19.0714	779.383	70.853
CC	1	7	10	1	Trask-Gus	Age2	1	24.6758	162.104	162.104
CC	1	7	10	1	Trask-Gus	Age3Plus	3	34.492	1323.17	441.058
CC	2	7	10	1	Trask-Gus	Age0	61	7.41284	320.146	5.24829
CC	2	7	10	1	Trask-Gus	Age1	7	18.4334	417.868	59.6954
CC	2	7	10	1	Trask-Gus	Age2	4	22.9779	504.852	126.213
CC	2	7	10	1	Trask-Gus	Age3Plus	4	36.8273	2100.95	525.238
CC	3	7	10	1	Trask-Gus	Age0	40	6.91331	168.49	4.21225
CC	3	7	10	1	Trask-Gus	Age1	12	19.2883	826.527	68.8772
CC	3	7	10	1	Trask-Gus	Age2	3	22.2733	341.221	113.74
CC	3	7	10	1	Trask-Gus	Age3Plus	5	34.6553	2139.84	427.968
CC	4	7	10	1	Trask-Gus	Age0	62	7.11132	292.192	4.71277
CC	4	7	10	1	Trask-Gus	Age1	4	19.7873	283.691	70.9226
CC	4	7	10	1	Trask-Gus	Age2	4	23.2309	485.537	121.384
CC	4	7	10	1	Trask-Gus	Age3Plus	4	36.9645	2069.8	517.451
CC	5	7	10	1	Trask-Gus	Age0	48	6.71926	184.386	3.84138
CC	5	7	10	1	Trask-Gus	Age1	13	20.1673	1001.95	77.0731
CC	5	7	10	1	Trask-Gus	Age2	2	24.2945	296.195	148.098
CC	5	7	10	1	Trask-Gus	Age3Plus	4	34.0399	1757.23	439.308
FH+CC	1	7	10	1	Trask-Gus	Age0	31	7.31145	163.293	5.26751
FH+CC	1	7	10	1	Trask-Gus	Age1	15	21.5353	1463.99	97.5995
FH+CC	1	7	10	1	Trask-Gus	Age2	2	23.2921	270.425	135.213
FH+CC	1	7	10	1	Trask-Gus	Age3Plus	3	35.143	1456.49	485.496
FH+CC	2	7	10	1	Trask-Gus	Age0	39	7.493	224.074	5.74549
FH+CC	2	7	10	1	Trask-Gus	Age1	15	20.2211	1249.8	83.3197
FH+CC	2	7	10	1	Trask-Gus	Age2	1	26.9288	223.056	223.056
FH+CC	2	7	10	1	Trask-Gus	Age3Plus	3	33.8554	1351.69	450.565
FH+CC	3	7	10	1	Trask-Gus	Age0	56	8.18383	415.209	7.41445
FH+CC	3	7	10	1	Trask-Gus	Age1	8	19.341	580.691	72.5863
FH+CC	3	7	10	1	Trask-Gus	Age2	2	23.552	277.705	138.852
FH+CC	3	7	10	1	Trask-Gus	Age3Plus	5	33.1911	2045.94	409.189
FH+CC	4	7	10	1	Trask-Gus	Age0	89	7.74645	573.193	6.44037
FH+CC	4	7	10	1	Trask-Gus	Age1	5	17.7564	286.991	57.3982
FH+CC	4	7	10	1	Trask-Gus	Age2	5	26.7906	1007.21	201.443
FH+CC	4	7	10	1	Trask-Gus	Age3Plus	3	33.8502	1291.34	430.447
FH+CC	5	7	10	1	Trask-Gus	Age0	69	7.36662	375.362	5.44002
FH+CC	5	7	10	1	Trask-Gus	Age1	7	17.9054	405.173	57.8819
FH+CC	5	7	10	1	Trask-Gus	Age2	6	28.0011	1575.56	262.594
FH+CC	5	7	10	1	Trask-Gus	Age3Plus	0	0	0	0
baseline	1	31	10	1	Trask-Pothole	Age0	65	21.597	11011.9	169.413
baseline	1	31	10	1	Trask-Pothole	Age1	34	24.9413	6613.43	194.513
baseline	1	31	10	1	Trask-Pothole	Age2	15	26.6822	4786.6	319.106
baseline	1	31	10	1	Trask-Pothole	Age3Plus	15	52.0416	43279.9	2885.32
baseline	2	31	10	1	Trask-Pothole	Age0	76	21.4147	12210.7	160.667
baseline	2	31	10	1	Trask-Pothole	Age1	25	23.269	5233.48	209.339
baseline	2	31	10	1	Trask-Pothole	Age2	11	33.1077	5326.39	484.218
baseline	2	31	10	1	Trask-Pothole	Age3Plus	12	34.672	10576.3	881.359
baseline	3	31	10	1	Trask-Pothole	Age0	61	21.6389	10848.3	177.841
baseline	3	31	10	1	Trask-Pothole	Age1	27	25.2081	6068.36	224.754
baseline	3	31	10	1	Trask-Pothole	Age2	14	33.7119	7119.03	508.502
baseline	3	31	10	1	Trask-Pothole	Age3Plus	17	33.3807	15472.3	910.134
baseline	4	31	10	1	Trask-Pothole	Age0	75	22.7206	13732	183.093
baseline	4	31	10	1	Trask-Pothole	Age1	24	21.1443	3771.8	157.158
baseline	4	31	10	1	Trask-Pothole	Age2	7	42.2272	5751.97	821.711
baseline	4	31	10	1	Trask-Pothole	Age3Plus	14	33.2023	7401.52	528.68
baseline	5	31	10	1	Trask-Pothole	Age0	65	21.2042	9497.96	146.122
baseline	5	31	10	1	Trask-Pothole	Age1	29	23.4227	4935.12	170.177
baseline	5	31	10	1	Trask-Pothole	Age2	11	27.3255	3352.19	304.744
baseline	5	31	10	1	Trask-Pothole	Age3Plus	12	52.0518	36833.4	3069.45
baseline	1	31	10	1	Trask-Rock	Age0	64	22.1424	11536.5	180.258
baseline	1	31	10	1	Trask-Rock	Age1	32	22.5757	5885.62	183.926
baseline	1	31	10	1	Trask-Rock	Age2	12	29.592	5388.7	449.058
baseline	1	31	10	1	Trask-Rock	Age3Plus	16	54.5479	44214.3	2763.39
baseline	2	31	10	1	Trask-Rock	Age0	68	21.015	10403.7	152.996
baseline	2	31	10	1	Trask-Rock	Age1	25	22.2161	4630.71	185.229
baseline	2	31	10	1	Trask-Rock	Age2	13	26.1196	3298.55	253.735
baseline	2	31	10	1	Trask-Rock	Age3Plus	16	53.2179	40051.8	2503.23
baseline	3	31	10	1	Trask-Rock	Age0	61	21.5127	9480.95	155.425
baseline	3	31	10	1	Trask-Rock	Age1	27	25.6572	5644.82	209.067
baseline	3	31	10	1	Trask-Rock	Age2	15	34.8285	8400.35	560.023
baseline	3	31	10	1	Trask-Rock	Age3Plus	20	48.9115	33593.5	1679.68
baseline	4	31	10	1	Trask-Rock	Age0	59	22.5108	10763.4	182.431
baseline	4	31	10	1	Trask-Rock	Age1	26	20.5778	3465.18	133.276
baseline	4	31	10	1	Trask-Rock	Age2	9	21.4424	1220.79	135.643
baseline	4	31	10	1	Trask-Rock	Age3Plus	16	43.6555	21137.7	1321.11
baseline	5	31	10	1	Trask-Rock	Age0	66	21.5916	11851	179.56
baseline	5	31	10	1	Trask-Rock	Age1	34	23.8218	7408.41	217.894
baseline	5	31	10	1	Trask-Rock	Age2	11	29.1977	5132.71	466.61
baseline	5	31	10	1	Trask-Rock	Age3Plus	14	46.4427	30817.4	2201.25
baseline	1	31	10	1	Trask-UM	Age0	115	17.5724	12009.2	104.428
baseline	1	31	10	1	Trask-UM	Age1	49	20.464	8180.01	166.939
baseline	1	31	10	1	Trask-UM	Age2	25	25.1358	7815.84	312.634
baseline	1	31	10	1	Trask-UM	Age3Plus	16	33.5777	11480.7	717.541
baseline	2	31	10	1	Trask-UM	Age0	114	17.672	12654.9	111.008
baseline	2	31	10	1	Trask-UM	Age1	46	18.9404	5962.82	129.626
baseline	2	31	10	1	Trask-UM	Age2	19	27.3182	6362.13	334.849
baseline	2	31	10	1	Trask-UM	Age3Plus	16	25.8318	5323.06	332.691
baseline	3	31	10	1	Trask-UM	Age0	118	17.3657	11080.3	93.9008
baseline	3	31	10	1	Trask-UM	Age1	47	21.7685	10113.1	215.172
baseline	3	31	10	1	Trask-UM	Age2	19	24.7152	5123.06	269.635
baseline	3	31	10	1	Trask-UM	Age3Plus	21	33.0955	29631.8	1411.04
baseline	4	31	10	1	Trask-UM	Age0	114	19.6202	15688.9	137.622
baseline	4	31	10	1	Trask-UM	Age1	51	17.2265	4469.04	87.6282
baseline	4	31	10	1	Trask-UM	Age2	19	24.1565	4863.71	255.985
baseline	4	31	10	1	Trask-UM	Age3Plus	19	41.4878	22477.6	1183.03
baseline	5	31	10	1	Trask-UM	Age0	109	18.7239	13220.7	121.291
baseline	5	31	10	1	Trask-UM	Age1	49	18.5054	6060.17	123.677
baseline	5	31	10	1	Trask-UM	Age2	21	24.7336	5388.23	256.582
baseline	5	31	10	1	Trask-UM	Age3Plus	17	36.4351	18929.7	1113.51
FH	1	31	10	1	Trask-Pothole	Age0	65	21.597	11011.9	169.413
FH	1	31	10	1	Trask-Pothole	Age1	34	24.9413	6613.43	194.513
FH	1	31	10	1	Trask-Pothole	Age2	15	26.6822	4786.6	319.106
FH	1	31	10	1	Trask-Pothole	Age3Plus	15	52.0416	43279.9	2885.32
FH	2	31	10	1	Trask-Pothole	Age0	76	21.4147	12210.7	160.667
FH	2	31	10	1	Trask-Pothole	Age1	25	23.269	5233.48	209.339
FH	2	31	10	1	Trask-Pothole	Age2	11	33.1077	5326.39	484.218
FH	2	31	10	1	Trask-Pothole	Age3Plus	12	34.672	10576.3	881.359
FH	3	31	10	1	Trask-Pothole	Age0	61	21.6389	10848.3	177.841
FH	3	31	10	1	Trask-Pothole	Age1	27	25.2081	6068.36	224.754
FH	3	31	10	1	Trask-Pothole	Age2	14	33.7119	7119.03	508.502
FH	3	31	10	1	Trask-Pothole	Age3Plus	17	33.3807	15472.3	910.134
FH	4	31	10	1	Trask-Pothole	Age0	75	22.7206	13732	183.093
FH	4	31	10	1	Trask-Pothole	Age1	24	21.1443	3771.8	157.158
FH	4	31	10	1	Trask-Pothole	Age2	7	42.2272	5751.97	821.711
FH	4	31	10	1	Trask-Pothole	Age3Plus	14	33.2023	7401.52	528.68
FH	5	31	10	1	Trask-Pothole	Age0	65	21.2042	9497.96	146.122
FH	5	31	10	1	Trask-Pothole	Age1	29	23.4227	4935.12	170.177
FH	5	31	10	1	Trask-Pothole	Age2	11	27.3255	3352.19	304.744
FH	5	31	10	1	Trask-Pothole	Age3Plus	12	52.0518	36833.4	3069.45
FH	1	31	10	1	Trask-Rock	Age0	64	22.1424	11536.5	180.258
FH	1	31	10	1	Trask-Rock	Age1	32	22.5757	5885.62	183.926
FH	1	31	10	1	Trask-Rock	Age2	12	29.592	5388.7	449.058
FH	1	31	10	1	Trask-Rock	Age3Plus	16	54.5479	44214.3	2763.39
FH	2	31	10	1	Trask-Rock	Age0	68	21.015	10403.7	152.996
FH	2	31	10	1	Trask-Rock	Age1	25	22.2161	4630.71	185.229
FH	2	31	10	1	Trask-Rock	Age2	13	26.1196	3298.55	253.735
FH	2	31	10	1	Trask-Rock	Age3Plus	16	53.2179	40051.8	2503.23
FH	3	31	10	1	Trask-Rock	Age0	61	21.5127	9480.95	155.425
FH	3	31	10	1	Trask-Rock	Age1	27	25.6572	5644.82	209.067
FH	3	31	10	1	Trask-Rock	Age2	15	34.8285	8400.35	560.023
FH	3	31	10	1	Trask-Rock	Age3Plus	20	48.9115	33593.5	1679.68
FH	4	31	10	1	Trask-Rock	Age0	59	22.5108	10763.4	182.431
FH	4	31	10	1	Trask-Rock	Age1	26	20.5778	3465.18	133.276
FH	4	31	10	1	Trask-Rock	Age2	9	21.4424	1220.79	135.643
FH	4	31	10	1	Trask-Rock	Age3Plus	16	43.6555	21137.7	1321.11
FH	5	31	10	1	Trask-Rock	Age0	66	21.5916	11851	179.56
FH	5	31	10	1	Trask-Rock	Age1	34	23.8218	7408.41	217.894
FH	5	31	10	1	Trask-Rock	Age2	11	29.1977	5132.71	466.61
FH	5	31	10	1	Trask-Rock	Age3Plus	14	46.4427	30817.4	2201.25
FH	1	31	10	1	Trask-UM	Age0	115	17.5724	12009.2	104.428
FH	1	31	10	1	Trask-UM	Age1	49	20.464	8180.01	166.939
FH	1	31	10	1	Trask-UM	Age2	25	25.1358	7815.84	312.634
FH	1	31	10	1	Trask-UM	Age3Plus	16	33.5777	11480.7	717.541
FH	2	31	10	1	Trask-UM	Age0	114	17.672	12654.9	111.008
FH	2	31	10	1	Trask-UM	Age1	46	18.9404	5962.82	129.626
FH	2	31	10	1	Trask-UM	Age2	19	27.3182	6362.13	334.849
FH	2	31	10	1	Trask-UM	Age3Plus	16	25.8318	5323.06	332.691
FH	3	31	10	1	Trask-UM	Age0	120	17.4424	11912.6	99.2719
FH	3	31	10	1	Trask-UM	Age1	45	18.3748	4778.39	106.187
FH	3	31	10	1	Trask-UM	Age2	17	28.5674	6437.72	378.69
FH	3	31	10	1	Trask-UM	Age3Plus	18	42.3359	23203	1289.06
FH	4	31	10	1	Trask-UM	Age0	114	19.6202	15688.9	137.622
FH	4	31	10	1	Trask-UM	Age1	51	17.2265	4469.04	87.6282
FH	4	31	10	1	Trask-UM	Age2	19	24.1565	4863.71	255.985
FH	4	31	10	1	Trask-UM	Age3Plus	19	41.4878	22477.6	1183.03
FH	5	31	10	1	Trask-UM	Age0	121	17.9237	12510.7	103.395
FH	5	31	10	1	Trask-UM	Age1	48	21.0387	7455.97	155.333
FH	5	31	10	1	Trask-UM	Age2	15	29.2531	5618.1	374.54
FH	5	31	10	1	Trask-UM	Age3Plus	13	33.6453	11957.2	919.785
CC	1	31	10	1	Trask-Pothole	Age0	65	21.597	11011.9	169.413
CC	1	31	10	1	Trask-Pothole	Age1	34	24.9413	6613.43	194.513
CC	1	31	10	1	Trask-Pothole	Age2	15	26.6822	4786.6	319.106
CC	1	31	10	1	Trask-Pothole	Age3Plus	15	52.0416	43279.9	2885.32
CC	2	31	10	1	Trask-Pothole	Age0	76	21.4147	12210.7	160.667
CC	2	31	10	1	Trask-Pothole	Age1	25	23.269	5233.48	209.339
CC	2	31	10	1	Trask-Pothole	Age2	11	33.1077	5326.39	484.218
CC	2	31	10	1	Trask-Pothole	Age3Plus	12	34.672	10576.3	881.359
CC	3	31	10	1	Trask-Pothole	Age0	61	21.6389	10848.3	177.841
CC	3	31	10	1	Trask-Pothole	Age1	27	25.2081	6068.36	224.754
CC	3	31	10	1	Trask-Pothole	Age2	14	33.7119	7119.03	508.502
CC	3	31	10	1	Trask-Pothole	Age3Plus	17	33.3807	15472.3	910.134
CC	4	31	10	1	Trask-Pothole	Age0	75	22.7206	13732	183.093
CC	4	31	10	1	Trask-Pothole	Age1	24	21.1443	3771.8	157.158
CC	4	31	10	1	Trask-Pothole	Age2	7	42.2272	5751.97	821.711
CC	4	31	10	1	Trask-Pothole	Age3Plus	14	33.2023	7401.52	528.68
CC	5	31	10	1	Trask-Pothole	Age0	65	21.2042	9497.96	146.122
CC	5	31	10	1	Trask-Pothole	Age1	29	23.4227	4935.12	170.177
CC	5	31	10	1	Trask-Pothole	Age2	11	27.3255	3352.19	304.744
CC	5	31	10	1	Trask-Pothole	Age3Plus	12	52.0518	36833.4	3069.45
CC	1	31	10	1	Trask-Rock	Age0	64	22.1424	11536.5	180.258
CC	1	31	10	1	Trask-Rock	Age1	32	22.5757	5885.62	183.926
CC	1	31	10	1	Trask-Rock	Age2	12	29.592	5388.7	449.058
CC	1	31	10	1	Trask-Rock	Age3Plus	16	54.5479	44214.3	2763.39
CC	2	31	10	1	Trask-Rock	Age0	68	21.015	10403.7	152.996
CC	2	31	10	1	Trask-Rock	Age1	25	22.2161	4630.71	185.229
CC	2	31	10	1	Trask-Rock	Age2	13	26.1196	3298.55	253.735
CC	2	31	10	1	Trask-Rock	Age3Plus	16	53.2179	40051.8	2503.23
CC	3	31	10	1	Trask-Rock	Age0	61	21.5127	9480.95	155.425
CC	3	31	10	1	Trask-Rock	Age1	27	25.6572	5644.82	209.067
CC	3	31	10	1	Trask-Rock	Age2	15	34.8285	8400.35	560.023
CC	3	31	10	1	Trask-Rock	Age3Plus	20	48.9115	33593.5	1679.68
CC	4	31	10	1	Trask-Rock	Age0	59	22.5108	10763.4	182.431
CC	4	31	10	1	Trask-Rock	Age1	26	20.5778	3465.18	133.276
CC	4	31	10	1	Trask-Rock	Age2	9	21.4424	1220.79	135.643
CC	4	31	10	1	Trask-Rock	Age3Plus	16	43.6555	21137.7	1321.11
CC	5	31	10	1	Trask-Rock	Age0	66	21.5916	11851	179.56
CC	5	31	10	1	Trask-Rock	Age1	34	23.8218	7408.41	217.894
CC	5	31	10	1	Trask-Rock	Age2	11	29.1977	5132.71	466.61
CC	5	31	10	1	Trask-Rock	Age3Plus	14	46.4427	30817.4	2201.25
CC	1	31	10	1	Trask-UM	Age0	115	17.5724	12009.2	104.428
CC	1	31	10	1	Trask-UM	Age1	49	20.464	8180.01	166.939
CC	1	31	10	1	Trask-UM	Age2	25	25.1358	7815.84	312.634
CC	1	31	10	1	Trask-UM	Age3Plus	16	33.5777	11480.7	717.541
CC	2	31	10	1	Trask-UM	Age0	114	17.672	12654.9	111.008
CC	2	31	10	1	Trask-UM	Age1	46	18.9404	5962.82	129.626
CC	2	31	10	1	Trask-UM	Age2	19	27.3182	6362.13	334.849
CC	2	31	10	1	Trask-UM	Age3Plus	16	25.8318	5323.06	332.691
CC	3	31	10	1	Trask-UM	Age0	118	17.3657	11080.3	93.9008
CC	3	31	10	1	Trask-UM	Age1	47	21.7685	10113.1	215.172
CC	3	31	10	1	Trask-UM	Age2	19	24.7152	5123.06	269.635
CC	3	31	10	1	Trask-UM	Age3Plus	21	33.0955	29631.8	1411.04
CC	4	31	10	1	Trask-UM	Age0	114	19.6202	15688.9	137.622
CC	4	31	10	1	Trask-UM	Age1	51	17.2265	4469.04	87.6282
CC	4	31	10	1	Trask-UM	Age2	19	24.1565	4863.71	255.985
CC	4	31	10	1	Trask-UM	Age3Plus	19	41.4878	22477.6	1183.03
CC	5	31	10	1	Trask-UM	Age0	109	18.7239	13220.7	121.291
CC	5	31	10	1	Trask-UM	Age1	49	18.5054	6060.17	123.677
CC	5	31	10	1	Trask-UM	Age2	21	24.7336	5388.23	256.582
CC	5	31	10	1	Trask-UM	Age3Plus	17	36.4351	18929.7	1113.51
FH+CC	1	31	10	1	Trask-Pothole	Age0	65	21.597	11011.9	169.413
FH+CC	1	31	10	1	Trask-Pothole	Age1	34	24.9413	6613.43	194.513
FH+CC	1	31	10	1	Trask-Pothole	Age2	15	26.6822	4786.6	319.106
FH+CC	1	31	10	1	Trask-Pothole	Age3Plus	15	52.0416	43279.9	2885.32
FH+CC	2	31	10	1	Trask-Pothole	Age0	76	21.4147	12210.7	160.667
FH+CC	2	31	10	1	Trask-Pothole	Age1	25	23.269	5233.48	209.339
FH+CC	2	31	10	1	Trask-Pothole	Age2	11	33.1077	5326.39	484.218
FH+CC	2	31	10	1	Trask-Pothole	Age3Plus	12	34.672	10576.3	881.359
FH+CC	3	31	10	1	Trask-Pothole	Age0	61	21.6389	10848.3	177.841
FH+CC	3	31	10	1	Trask-Pothole	Age1	27	25.2081	6068.36	224.754
FH+CC	3	31	10	1	Trask-Pothole	Age2	14	33.7119	7119.03	508.502
FH+CC	3	31	10	1	Trask-Pothole	Age3Plus	17	33.3807	15472.3	910.134
FH+CC	4	31	10	1	Trask-Pothole	Age0	75	22.7206	13732	183.093
FH+CC	4	31	10	1	Trask-Pothole	Age1	24	21.1443	3771.8	157.158
FH+CC	4	31	10	1	Trask-Pothole	Age2	7	42.2272	5751.97	821.711
FH+CC	4	31	10	1	Trask-Pothole	Age3Plus	14	33.2023	7401.52	528.68
FH+CC	5	31	10	1	Trask-Pothole	Age0	65	21.2042	9497.96	146.122
FH+CC	5	31	10	1	Trask-Pothole	Age1	29	23.4227	4935.12	170.177
FH+CC	5	31	10	1	Trask-Pothole	Age2	11	27.3255	3352.19	304.744
FH+CC	5	31	10	1	Trask-Pothole	Age3Plus	12	52.0518	36833.4	3069.45
FH+CC	1	31	10	1	Trask-Rock	Age0	64	22.1424	11536.5	180.258
FH+CC	1	31	10	1	Trask-Rock	Age1	32	22.5757	5885.62	183.926
FH+CC	1	31	10	1	Trask-Rock	Age2	12	29.592	5388.7	449.058
FH+CC	1	31	10	1	Trask-Rock	Age3Plus	16	54.5479	44214.3	2763.39
FH+CC	2	31	10	1	Trask-Rock	Age0	68	21.015	10403.7	152.996
FH+CC	2	31	10	1	Trask-Rock	Age1	25	22.2161	4630.71	185.229
FH+CC	2	31	10	1	Trask-Rock	Age2	13	26.1196	3298.55	253.735
FH+CC	2	31	10	1	Trask-Rock	Age3Plus	16	53.2179	40051.8	2503.23
FH+CC	3	31	10	1	Trask-Rock	Age0	61	21.5127	9480.95	155.425
FH+CC	3	31	10	1	Trask-Rock	Age1	27	25.6572	5644.82	209.067
FH+CC	3	31	10	1	Trask-Rock	Age2	15	34.8285	8400.35	560.023
FH+CC	3	31	10	1	Trask-Rock	Age3Plus	20	48.9115	33593.5	1679.68
FH+CC	4	31	10	1	Trask-Rock	Age0	59	22.5108	10763.4	182.431
FH+CC	4	31	10	1	Trask-Rock	Age1	26	20.5778	3465.18	133.276
FH+CC	4	31	10	1	Trask-Rock	Age2	9	21.4424	1220.79	135.643
FH+CC	4	31	10	1	Trask-Rock	Age3Plus	16	43.6555	21137.7	1321.11
FH+CC	5	31	10	1	Trask-Rock	Age0	66	21.5916	11851	179.56
FH+CC	5	31	10	1	Trask-Rock	Age1	34	23.8218	7408.41	217.894
FH+CC	5	31	10	1	Trask-Rock	Age2	11	29.1977	5132.71	466.61
FH+CC	5	31	10	1	Trask-Rock	Age3Plus	14	46.4427	30817.4	2201.25
FH+CC	1	31	10	1	Trask-UM	Age0	115	17.5724	12009.2	104.428
FH+CC	1	31	10	1	Trask-UM	Age1	49	20.464	8180.01	166.939
FH+CC	1	31	10	1	Trask-UM	Age2	25	25.1358	7815.84	312.634
FH+CC	1	31	10	1	Trask-UM	Age3Plus	16	33.5777	11480.7	717.541
FH+CC	2	31	10	1	Trask-UM	Age0	114	17.672	12654.9	111.008
FH+CC	2	31	10	1	Trask-UM	Age1	46	18.9404	5962.82	129.626
FH+CC	2	31	10	1	Trask-UM	Age2	19	27.3182	6362.13	334.849
FH+CC	2	31	10	1	Trask-UM	Age3Plus	16	25.8318	5323.06	332.691
FH+CC	3	31	10	1	Trask-UM	Age0	118	17.3657	11080.3	93.9008
FH+CC	3	31	10	1	Trask-UM	Age1	47	21.7685	10113.1	215.172
FH+CC	3	31	10	1	Trask-UM	Age2	19	24.7152	5123.06	269.635
FH+CC	3	31	10	1	Trask-UM	Age3Plus	21	33.0955	29631.8	1411.04
FH+CC	4	31	10	1	Trask-UM	Age0	120	17.4424	11912.6	99.2719
FH+CC	4	31	10	1	Trask-UM	Age1	45	18.3748	4778.39	106.187
FH+CC	4	31	10	1	Trask-UM	Age2	17	28.5674	6437.72	378.69
FH+CC	4	31	10	1	Trask-UM	Age3Plus	18	42.3359	23203	1289.06
FH+CC	5	31	10	1	Trask-UM	Age0	114	19.6202	15688.9	137.622
FH+CC	5	31	10	1	Trask-UM	Age1	51	17.2265	4469.04	87.6282
FH+CC	5	31	10	1	Trask-UM	Age2	19	24.1565	4863.71	255.985
FH+CC	5	31	10	1	Trask-UM	Age3Plus	19	41.4878	22477.6	1183.03
baseline	1	6	11	1	Trask-Gus	Age0	40	7.68896	229.79	5.74475
baseline	1	6	11	1	Trask-Gus	Age1	19	18.8739	1468.55	77.2923
baseline	1	6	11	1	Trask-Gus	Age2	1	26.9056	226.127	226.127
baseline	1	6	11	1	Trask-Gus	Age3Plus	0	0	0	0
baseline	2	6	11	1	Trask-Gus	Age0	41	8.1455	272.375	6.64329
baseline	2	6	11	1	Trask-Gus	Age1	10	18.213	667.686	66.7686
baseline	2	6	11	1	Trask-Gus	Age2	3	24.6815	519.851	173.284
baseline	2	6	11	1	Trask-Gus	Age3Plus	3	31.9519	1152.3	384.1
baseline	3	6	11	1	Trask-Gus	Age0	50	8.01127	316.783	6.33567
baseline	3	6	11	1	Trask-Gus	Age1	11	16.7066	591.418	53.7653
baseline	3	6	11	1	Trask-Gus	Age2	4	28.1294	962.134	240.534
baseline	3	6	11	1	Trask-Gus	Age3Plus	3	33.7746	1346.42	448.807
baseline	4	6	11	1	Trask-Gus	Age0	16	8.0118	104.968	6.56048
baseline	4	6	11	1	Trask-Gus	Age1	10	17.6506	618.019	61.8019
baseline	4	6	11	1	Trask-Gus	Age2	2	25.5656	358.266	179.133
baseline	4	6	11	1	Trask-Gus	Age3Plus	3	34.0968	1322.71	440.905
baseline	5	6	11	1	Trask-Gus	Age0	44	8.13362	293.979	6.68133
baseline	5	6	11	1	Trask-Gus	Age1	13	17.3428	770.484	59.268
baseline	5	6	11	1	Trask-Gus	Age2	1	23.5551	141.265	141.265
baseline	5	6	11	1	Trask-Gus	Age3Plus	4	35.5993	1963.6	490.899
FH	1	6	11	1	Trask-Gus	Age0	29	8.12789	205.133	7.07355
FH	1	6	11	1	Trask-Gus	Age1	10	17.654	607.519	60.7519
FH	1	6	11	1	Trask-Gus	Age2	3	24.387	466.004	155.335
FH	1	6	11	1	Trask-Gus	Age3Plus	7	32.9501	3139.11	448.444
FH	2	6	11	1	Trask-Gus	Age0	37	8.10479	246.084	6.65092
FH	2	6	11	1	Trask-Gus	Age1	12	18.032	779.896	64.9913
FH	2	6	11	1	Trask-Gus	Age2	1	23.3103	138.532	138.532
FH	2	6	11	1	Trask-Gus	Age3Plus	5	32.7945	1995.26	399.053
FH	3	6	11	1	Trask-Gus	Age0	35	7.65313	201.075	5.74499
FH	3	6	11	1	Trask-Gus	Age1	13	17.672	799.971	61.5362
FH	3	6	11	1	Trask-Gus	Age2	4	24.8953	678.551	169.638
FH	3	6	11	1	Trask-Gus	Age3Plus	4	34.7941	1975.05	493.762
FH	4	6	11	1	Trask-Gus	Age0	20	7.97911	129.383	6.46915
FH	4	6	11	1	Trask-Gus	Age1	16	18.5665	1117.06	69.8165
FH	4	6	11	1	Trask-Gus	Age2	4	25.4031	718.256	179.564
FH	4	6	11	1	Trask-Gus	Age3Plus	4	37.6705	2362.79	590.697
FH	5	6	11	1	Trask-Gus	Age0	37	8.04376	246.188	6.65373
FH	5	6	11	1	Trask-Gus	Age1	10	16.9573	565.647	56.5647
FH	5	6	11	1	Trask-Gus	Age2	3	24.9307	488.486	162.829
FH	5	6	11	1	Trask-Gus	Age3Plus	3	39.6484	2126.87	708.955
CC	1	6	11	1	Trask-Gus	Age0	56	9.08891	532.006	9.50011
CC	1	6	11	1	Trask-Gus	Age1	10	19.0158	768.918	76.8918
CC	1	6	11	1	Trask-Gus	Age2	1	24.6758	166.103	166.103
CC	1	6	11	1	Trask-Gus	Age3Plus	2	34.4928	917.187	458.593
CC	2	6	11	1	Trask-Gus	Age0	38	9.34375	383.11	10.0818
CC	2	6	11	1	Trask-Gus	Age1	5	18.6459	345.687	69.1373
CC	2	6	11	1	Trask-Gus	Age2	3	21.8025	349.116	116.372
CC	2	6	11	1	Trask-Gus	Age3Plus	4	36.8273	2146.3	536.574
CC	3	6	11	1	Trask-Gus	Age0	27	8.77083	226.097	8.37395
CC	3	6	11	1	Trask-Gus	Age1	11	19.2286	838.991	76.2719
CC	3	6	11	1	Trask-Gus	Age2	1	23.47	134.953	134.953
CC	3	6	11	1	Trask-Gus	Age3Plus	4	35.1187	1862.84	465.71
CC	4	6	11	1	Trask-Gus	Age0	49	8.93313	433.692	8.85086
CC	4	6	11	1	Trask-Gus	Age1	4	19.7873	315.672	78.9181
CC	4	6	11	1	Trask-Gus	Age2	3	23.1817	382.866	127.622
CC	4	6	11	1	Trask-Gus	Age3Plus	4	36.9645	2127.51	531.878
CC	5	6	11	1	Trask-Gus	Age0	25	8.49783	192.697	7.70789
CC	5	6	11	1	Trask-Gus	Age1	13	20.1673	1132.72	87.1325
CC	5	6	11	1	Trask-Gus	Age2	2	24.2945	306.615	153.307
CC	5	6	11	1	Trask-Gus	Age3Plus	4	34.0399	1812.53	453.132
FH+CC	1	6	11	1	Trask-Gus	Age0	19	9.07364	183.693	9.66803
FH+CC	1	6	11	1	Trask-Gus	Age1	14	21.451	1481.89	105.849
FH+CC	1	6	11	1	Trask-Gus	Age2	2	23.2921	288.196	144.098
FH+CC	1	6	11	1	Trask-Gus	Age3Plus	3	35.143	1487.85	495.951
FH+CC	2	6	11	1	Trask-Gus	Age0	23	9.57592	253.053	11.0023
FH+CC	2	6	11	1	Trask-Gus	Age1	13	20.7914	1287.91	99.0699
FH+CC	2	6	11	1	Trask-Gus	Age2	1	26.9288	226.58	226.58
FH+CC	2	6	11	1	Trask-Gus	Age3Plus	3	33.9077	1384.03	461.344
FH+CC	3	6	11	1	Trask-Gus	Age0	44	9.95574	549.737	12.494
FH+CC	3	6	11	1	Trask-Gus	Age1	8	19.341	633.379	79.1724
FH+CC	3	6	11	1	Trask-Gus	Age2	1	20.652	96.5304	96.5304
FH+CC	3	6	11	1	Trask-Gus	Age3Plus	5	33.1911	2098.94	419.788
FH+CC	4	6	11	1	Trask-Gus	Age0	68	9.55643	771.972	11.3525
FH+CC	4	6	11	1	Trask-Gus	Age1	5	17.7564	305.524	61.1047
FH+CC	4	6	11	1	Trask-Gus	Age2	4	26.5632	832.645	208.161
FH+CC	4	6	11	1	Trask-Gus	Age3Plus	3	33.8841	1331.56	443.853
FH+CC	5	6	11	1	Trask-Gus	Age0	53	9.25626	533.142	10.0593
FH+CC	5	6	11	1	Trask-Gus	Age1	7	17.9054	441.329	63.047
FH+CC	5	6	11	1	Trask-Gus	Age2	4	28.3739	1106.38	276.595
FH+CC	5	6	11	1	Trask-Gus	Age3Plus	0	0	0	0
baseline	1	30	11	1	Trask-Pothole	Age0	41	23.9947	8362.63	203.967
baseline	1	30	11	1	Trask-Pothole	Age1	17	25.8887	3339.4	196.435
baseline	1	30	11	1	Trask-Pothole	Age2	10	24.4643	2016.73	201.673
baseline	1	30	11	1	Trask-Pothole	Age3Plus	10	56.0449	33101.9	3310.19
baseline	2	30	11	1	Trask-Pothole	Age0	35	23.4283	7042.32	201.209
baseline	2	30	11	1	Trask-Pothole	Age1	15	25.4491	3751.31	250.087
baseline	2	30	11	1	Trask-Pothole	Age2	7	40.317	4669.9	667.129
baseline	2	30	11	1	Trask-Pothole	Age3Plus	8	30.3247	3777.74	472.217
baseline	3	30	11	1	Trask-Pothole	Age0	41	23.8697	8696.41	212.108
baseline	3	30	11	1	Trask-Pothole	Age1	12	25.4984	3014.03	251.169
baseline	3	30	11	1	Trask-Pothole	Age2	9	35.7271	4669.42	518.824
baseline	3	30	11	1	Trask-Pothole	Age3Plus	7	34.8673	3315.82	473.689
baseline	4	30	11	1	Trask-Pothole	Age0	45	23.0558	8663.75	192.528
baseline	4	30	11	1	Trask-Pothole	Age1	9	24.3426	2130.79	236.754
baseline	4	30	11	1	Trask-Pothole	Age2	6	42.0518	4642.53	773.754
baseline	4	30	11	1	Trask-Pothole	Age3Plus	10	34.7987	5997.8	599.78
baseline	5	30	11	1	Trask-Pothole	Age0	37	21.7097	5946.98	160.729
baseline	5	30	11	1	Trask-Pothole	Age1	16	25.416	3299.95	206.247
baseline	5	30	11	1	Trask-Pothole	Age2	8	30.7122	2915.45	364.431
baseline	5	30	11	1	Trask-Pothole	Age3Plus	10	55.2356	34440.2	3444.02
baseline	1	30	11	1	Trask-Rock	Age0	46	23.369	9223.9	200.519
baseline	1	30	11	1	Trask-Rock	Age1	23	23.4789	4791.66	208.333
baseline	1	30	11	1	Trask-Rock	Age2	9	30.6107	4089.3	454.366
baseline	1	30	11	1	Trask-Rock	Age3Plus	10	53.635	20904.9	2090.49
baseline	2	30	11	1	Trask-Rock	Age0	42	21.661	6571.83	156.472
baseline	2	30	11	1	Trask-Rock	Age1	16	24.573	3479.74	217.483
baseline	2	30	11	1	Trask-Rock	Age2	8	22.1468	1000.05	125.006
baseline	2	30	11	1	Trask-Rock	Age3Plus	11	55.3997	27477.6	2497.96
baseline	3	30	11	1	Trask-Rock	Age0	40	21.3701	6247.93	156.198
baseline	3	30	11	1	Trask-Rock	Age1	21	26.277	4573.1	217.767
baseline	3	30	11	1	Trask-Rock	Age2	12	37.0815	7497.21	624.768
baseline	3	30	11	1	Trask-Rock	Age3Plus	16	52.0286	29564.8	1847.8
baseline	4	30	11	1	Trask-Rock	Age0	44	23.2105	8591.68	195.265
baseline	4	30	11	1	Trask-Rock	Age1	14	21.992	2197.23	156.945
baseline	4	30	11	1	Trask-Rock	Age2	7	19.5445	732.872	104.696
baseline	4	30	11	1	Trask-Rock	Age3Plus	11	45.2248	15304.4	1391.31
baseline	5	30	11	1	Trask-Rock	Age0	42	22.6191	8877.97	211.38
baseline	5	30	11	1	Trask-Rock	Age1	20	26.6062	5314.26	265.713
baseline	5	30	11	1	Trask-Rock	Age2	9	32.7613	4883.26	542.584
baseline	5	30	11	1	Trask-Rock	Age3Plus	11	41.5908	15732.6	1430.24
baseline	1	30	11	1	Trask-UM	Age0	95	17.7639	9849.52	103.679
baseline	1	30	11	1	Trask-UM	Age1	36	19.6399	5814.64	161.518
baseline	1	30	11	1	Trask-UM	Age2	20	25.9415	6689.51	334.475
baseline	1	30	11	1	Trask-UM	Age3Plus	12	36.0589	8875.6	739.634
baseline	2	30	11	1	Trask-UM	Age0	93	17.4402	8872.66	95.4049
baseline	2	30	11	1	Trask-UM	Age1	39	17.8181	4013.01	102.898
baseline	2	30	11	1	Trask-UM	Age2	16	25.2847	4213.99	263.375
baseline	2	30	11	1	Trask-UM	Age3Plus	12	25.4401	4077.65	339.804
baseline	3	30	11	1	Trask-UM	Age0	104	17.1772	9303.02	89.4521
baseline	3	30	11	1	Trask-UM	Age1	38	20.366	6259.04	164.712
baseline	3	30	11	1	Trask-UM	Age2	13	25.2694	3221.53	247.81
baseline	3	30	11	1	Trask-UM	Age3Plus	17	35.1069	27808.4	1635.79
baseline	4	30	11	1	Trask-UM	Age0	90	19.6887	12725.9	141.399
baseline	4	30	11	1	Trask-UM	Age1	37	17.1324	3180.51	85.9596
baseline	4	30	11	1	Trask-UM	Age2	15	23.4821	3692.39	246.159
baseline	4	30	11	1	Trask-UM	Age3Plus	15	38.7922	12860.5	857.366
baseline	5	30	11	1	Trask-UM	Age0	89	18.599	10213.7	114.761
baseline	5	30	11	1	Trask-UM	Age1	42	18.6424	5206.16	123.956
baseline	5	30	11	1	Trask-UM	Age2	21	24.7632	5112.36	243.446
baseline	5	30	11	1	Trask-UM	Age3Plus	11	35.026	11421.8	1038.35
FH	1	30	11	1	Trask-Pothole	Age0	41	23.9947	8362.63	203.967
FH	1	30	11	1	Trask-Pothole	Age1	17	25.8887	3339.4	196.435
FH	1	30	11	1	Trask-Pothole	Age2	10	24.4643	2016.73	201.673
FH	1	30	11	1	Trask-Pothole	Age3Plus	10	56.0449	33101.9	3310.19
FH	2	30	11	1	Trask-Pothole	Age0	35	23.4283	7042.32	201.209
FH	2	30	11	1	Trask-Pothole	Age1	15	25.4491	3751.31	250.087
FH	2	30	11	1	Trask-Pothole	Age2	7	40.317	4669.9	667.129
FH	2	30	11	1	Trask-Pothole	Age3Plus	8	30.3247	3777.74	472.217
FH	3	30	11	1	Trask-Pothole	Age0	41	23.8697	8696.41	212.108
FH	3	30	11	1	Trask-Pothole	Age1	12	25.4984	3014.03	251.169
FH	3	30	11	1	Trask-Pothole	Age2	9	35.7271	4669.42	518.824
FH	3	30	11	1	Trask-Pothole	Age3Plus	7	34.8673	3315.82	473.689
FH	4	30	11	1	Trask-Pothole	Age0	45	23.0558	8663.75	192.528
FH	4	30	11	1	Trask-Pothole	Age1	9	24.3426	2130.79	236.754
FH	4	30	11	1	Trask-Pothole	Age2	6	42.0518	4642.53	773.754
FH	4	30	11	1	Trask-Pothole	Age3Plus	10	34.7987	5997.8	599.78
FH	5	30	11	1	Trask-Pothole	Age0	37	21.7097	5946.98	160.729
FH	5	30	11	1	Trask-Pothole	Age1	16	25.416	3299.95	206.247
FH	5	30	11	1	Trask-Pothole	Age2	8	30.7122	2915.45	364.431
FH	5	30	11	1	Trask-Pothole	Age3Plus	10	55.2356	34440.2	3444.02
FH	1	30	11	1	Trask-Rock	Age0	46	23.369	9223.9	200.519
FH	1	30	11	1	Trask-Rock	Age1	23	23.4789	4791.66	208.333
FH	1	30	11	1	Trask-Rock	Age2	9	30.6107	4089.3	454.366
FH	1	30	11	1	Trask-Rock	Age3Plus	10	53.635	20904.9	2090.49
FH	2	30	11	1	Trask-Rock	Age0	42	21.661	6571.83	156.472
FH	2	30	11	1	Trask-Rock	Age1	16	24.573	3479.74	217.483
FH	2	30	11	1	Trask-Rock	Age2	8	22.1468	1000.05	125.006
FH	2	30	11	1	Trask-Rock	Age3Plus	11	55.3997	27477.6	2497.96
FH	3	30	11	1	Trask-Rock	Age0	40	21.3701	6247.93	156.198
FH	3	30	11	1	Trask-Rock	Age1	21	26.277	4573.1	217.767
FH	3	30	11	1	Trask-Rock	Age2	12	37.0815	7497.21	624.768
FH	3	30	11	1	Trask-Rock	Age3Plus	16	52.0286	29564.8	1847.8
FH	4	30	11	1	Trask-Rock	Age0	44	23.2105	8591.68	195.265
FH	4	30	11	1	Trask-Rock	Age1	14	21.992	2197.23	156.945
FH	4	30	11	1	Trask-Rock	Age2	7	19.5445	732.872	104.696
FH	4	30	11	1	Trask-Rock	Age3Plus	11	45.2248	15304.4	1391.31
FH	5	30	11	1	Trask-Rock	Age0	42	22.6191	8877.97	211.38
FH	5	30	11	1	Trask-Rock	Age1	20	26.6062	5314.26	265.713
FH	5	30	11	1	Trask-Rock	Age2	9	32.7613	4883.26	542.584
FH	5	30	11	1	Trask-Rock	Age3Plus	11	41.5908	15732.6	1430.24
FH	1	30	11	1	Trask-UM	Age0	95	17.7639	9849.52	103.679
FH	1	30	11	1	Trask-UM	Age1	36	19.6399	5814.64	161.518
FH	1	30	11	1	Trask-UM	Age2	20	25.9415	6689.51	334.475
FH	1	30	11	1	Trask-UM	Age3Plus	12	36.0589	8875.6	739.634
FH	2	30	11	1	Trask-UM	Age0	93	17.4402	8872.66	95.4049
FH	2	30	11	1	Trask-UM	Age1	39	17.8181	4013.01	102.898
FH	2	30	11	1	Trask-UM	Age2	16	25.2847	4213.99	263.375
FH	2	30	11	1	Trask-UM	Age3Plus	12	25.4401	4077.65	339.804
FH	3	30	11	1	Trask-UM	Age0	95	16.7741	7953.88	83.7251
FH	3	30	11	1	Trask-UM	Age1	34	17.4507	3290.62	96.7831
FH	3	30	11	1	Trask-UM	Age2	14	30.9725	5954.25	425.303
FH	3	30	11	1	Trask-UM	Age3Plus	14	43.3118	15431.1	1102.22
FH	4	30	11	1	Trask-UM	Age0	90	19.6887	12725.9	141.399
FH	4	30	11	1	Trask-UM	Age1	37	17.1324	3180.51	85.9596
FH	4	30	11	1	Trask-UM	Age2	15	23.4821	3692.39	246.159
FH	4	30	11	1	Trask-UM	Age3Plus	15	38.7922	12860.5	857.366
FH	5	30	11	1	Trask-UM	Age0	106	17.9465	10663.1	100.595
FH	5	30	11	1	Trask-UM	Age1	39	20.8638	5784.5	148.321
FH	5	30	11	1	Trask-UM	Age2	11	28.0334	3894.09	354.008
FH	5	30	11	1	Trask-UM	Age3Plus	11	31.5389	8553.81	777.619
CC	1	30	11	1	Trask-Pothole	Age0	41	23.9947	8362.63	203.967
CC	1	30	11	1	Trask-Pothole	Age1	17	25.8887	3339.4	196.435
CC	1	30	11	1	Trask-Pothole	Age2	10	24.4643	2016.73	201.673
CC	1	30	11	1	Trask-Pothole	Age3Plus	10	56.0449	33101.9	3310.19
CC	2	30	11	1	Trask-Pothole	Age0	35	23.4283	7042.32	201.209
CC	2	30	11	1	Trask-Pothole	Age1	15	25.4491	3751.31	250.087
CC	2	30	11	1	Trask-Pothole	Age2	7	40.317	4669.9	667.129
CC	2	30	11	1	Trask-Pothole	Age3Plus	8	30.3247	3777.74	472.217
CC	3	30	11	1	Trask-Pothole	Age0	41	23.8697	8696.41	212.108
CC	3	30	11	1	Trask-Pothole	Age1	12	25.4984	3014.03	251.169
CC	3	30	11	1	Trask-Pothole	Age2	9	35.7271	4669.42	518.824
CC	3	30	11	1	Trask-Pothole	Age3Plus	7	34.8673	3315.82	473.689
CC	4	30	11	1	Trask-Pothole	Age0	45	23.0558	8663.75	192.528
CC	4	30	11	1	Trask-Pothole	Age1	9	24.3426	2130.79	236.754
CC	4	30	11	1	Trask-Pothole	Age2	6	42.0518	4642.53	773.754
CC	4	30	11	1	Trask-Pothole	Age3Plus	10	34.7987	5997.8	599.78
CC	5	30	11	1	Trask-Pothole	Age0	37	21.7097	5946.98	160.729
CC	5	30	11	1	Trask-Pothole	Age1	16	25.416	3299.95	206.247
CC	5	30	11	1	Trask-Pothole	Age2	8	30.7122	2915.45	364.431
CC	5	30	11	1	Trask-Pothole	Age3Plus	10	55.2356	34440.2	3444.02
CC	1	30	11	1	Trask-Rock	Age0	46	23.369	9223.9	200.519
CC	1	30	11	1	Trask-Rock	Age1	23	23.4789	4791.66	208.333
CC	1	30	11	1	Trask-Rock	Age2	9	30.6107	4089.3	454.366
CC	1	30	11	1	Trask-Rock	Age3Plus	10	53.635	20904.9	2090.49
CC	2	30	11	1	Trask-Rock	Age0	42	21.661	6571.83	156.472
CC	2	30	11	1	Trask-Rock	Age1	16	24.573	3479.74	217.483
CC	2	30	11	1	Trask-Rock	Age2	8	22.1468	1000.05	125.006
CC	2	30	11	1	Trask-Rock	Age3Plus	11	55.3997	27477.6	2497.96
CC	3	30	11	1	Trask-Rock	Age0	40	21.3701	6247.93	156.198
CC	3	30	11	1	Trask-Rock	Age1	21	26.277	4573.1	217.767
CC	3	30	11	1	Trask-Rock	Age2	12	37.0815	7497.21	624.768
CC	3	30	11	1	Trask-Rock	Age3Plus	16	52.0286	29564.8	1847.8
CC	4	30	11	1	Trask-Rock	Age0	44	23.2105	8591.68	195.265
CC	4	30	11	1	Trask-Rock	Age1	14	21.992	2197.23	156.945
CC	4	30	11	1	Trask-Rock	Age2	7	19.5445	732.872	104.696
CC	4	30	11	1	Trask-Rock	Age3Plus	11	45.2248	15304.4	1391.31
CC	5	30	11	1	Trask-Rock	Age0	42	22.6191	8877.97	211.38
CC	5	30	11	1	Trask-Rock	Age1	20	26.6062	5314.26	265.713
CC	5	30	11	1	Trask-Rock	Age2	9	32.7613	4883.26	542.584
CC	5	30	11	1	Trask-Rock	Age3Plus	11	41.5908	15732.6	1430.24
CC	1	30	11	1	Trask-UM	Age0	95	17.7639	9849.52	103.679
CC	1	30	11	1	Trask-UM	Age1	36	19.6399	5814.64	161.518
CC	1	30	11	1	Trask-UM	Age2	20	25.9415	6689.51	334.475
CC	1	30	11	1	Trask-UM	Age3Plus	12	36.0589	8875.6	739.634
CC	2	30	11	1	Trask-UM	Age0	93	17.4402	8872.66	95.4049
CC	2	30	11	1	Trask-UM	Age1	39	17.8181	4013.01	102.898
CC	2	30	11	1	Trask-UM	Age2	16	25.2847	4213.99	263.375
CC	2	30	11	1	Trask-UM	Age3Plus	12	25.4401	4077.65	339.804
CC	3	30	11	1	Trask-UM	Age0	104	17.1772	9303.02	89.4521
CC	3	30	11	1	Trask-UM	Age1	38	20.366	6259.04	164.712
CC	3	30	11	1	Trask-UM	Age2	13	25.2694	3221.53	247.81
CC	3	30	11	1	Trask-UM	Age3Plus	17	35.1069	27808.4	1635.79
CC	4	30	11	1	Trask-UM	Age0	90	19.6887	12725.9	141.399
CC	4	30	11	1	Trask-UM	Age1	37	17.1324	3180.51	85.9596
CC	4	30	11	1	Trask-UM	Age2	15	23.4821	3692.39	246.159
CC	4	30	11	1	Trask-UM	Age3Plus	15	38.7922	12860.5	857.366
CC	5	30	11	1	Trask-UM	Age0	89	18.599	10213.7	114.761
CC	5	30	11	1	Trask-UM	Age1	42	18.6424	5206.16	123.956
CC	5	30	11	1	Trask-UM	Age2	21	24.7632	5112.36	243.446
CC	5	30	11	1	Trask-UM	Age3Plus	11	35.026	11421.8	1038.35
FH+CC	1	30	11	1	Trask-Pothole	Age0	41	23.9947	8362.63	203.967
FH+CC	1	30	11	1	Trask-Pothole	Age1	17	25.8887	3339.4	196.435
FH+CC	1	30	11	1	Trask-Pothole	Age2	10	24.4643	2016.73	201.673
FH+CC	1	30	11	1	Trask-Pothole	Age3Plus	10	56.0449	33101.9	3310.19
FH+CC	2	30	11	1	Trask-Pothole	Age0	35	23.4283	7042.32	201.209
FH+CC	2	30	11	1	Trask-Pothole	Age1	15	25.4491	3751.31	250.087
FH+CC	2	30	11	1	Trask-Pothole	Age2	7	40.317	4669.9	667.129
FH+CC	2	30	11	1	Trask-Pothole	Age3Plus	8	30.3247	3777.74	472.217
FH+CC	3	30	11	1	Trask-Pothole	Age0	41	23.8697	8696.41	212.108
FH+CC	3	30	11	1	Trask-Pothole	Age1	12	25.4984	3014.03	251.169
FH+CC	3	30	11	1	Trask-Pothole	Age2	9	35.7271	4669.42	518.824
FH+CC	3	30	11	1	Trask-Pothole	Age3Plus	7	34.8673	3315.82	473.689
FH+CC	4	30	11	1	Trask-Pothole	Age0	45	23.0558	8663.75	192.528
FH+CC	4	30	11	1	Trask-Pothole	Age1	9	24.3426	2130.79	236.754
FH+CC	4	30	11	1	Trask-Pothole	Age2	6	42.0518	4642.53	773.754
FH+CC	4	30	11	1	Trask-Pothole	Age3Plus	10	34.7987	5997.8	599.78
FH+CC	5	30	11	1	Trask-Pothole	Age0	37	21.7097	5946.98	160.729
FH+CC	5	30	11	1	Trask-Pothole	Age1	16	25.416	3299.95	206.247
FH+CC	5	30	11	1	Trask-Pothole	Age2	8	30.7122	2915.45	364.431
FH+CC	5	30	11	1	Trask-Pothole	Age3Plus	10	55.2356	34440.2	3444.02
FH+CC	1	30	11	1	Trask-Rock	Age0	46	23.369	9223.9	200.519
FH+CC	1	30	11	1	Trask-Rock	Age1	23	23.4789	4791.66	208.333
FH+CC	1	30	11	1	Trask-Rock	Age2	9	30.6107	4089.3	454.366
FH+CC	1	30	11	1	Trask-Rock	Age3Plus	10	53.635	20904.9	2090.49
FH+CC	2	30	11	1	Trask-Rock	Age0	42	21.661	6571.83	156.472
FH+CC	2	30	11	1	Trask-Rock	Age1	16	24.573	3479.74	217.483
FH+CC	2	30	11	1	Trask-Rock	Age2	8	22.1468	1000.05	125.006
FH+CC	2	30	11	1	Trask-Rock	Age3Plus	11	55.3997	27477.6	2497.96
FH+CC	3	30	11	1	Trask-Rock	Age0	40	21.3701	6247.93	156.198
FH+CC	3	30	11	1	Trask-Rock	Age1	21	26.277	4573.1	217.767
FH+CC	3	30	11	1	Trask-Rock	Age2	12	37.0815	7497.21	624.768
FH+CC	3	30	11	1	Trask-Rock	Age3Plus	16	52.0286	29564.8	1847.8
FH+CC	4	30	11	1	Trask-Rock	Age0	44	23.2105	8591.68	195.265
FH+CC	4	30	11	1	Trask-Rock	Age1	14	21.992	2197.23	156.945
FH+CC	4	30	11	1	Trask-Rock	Age2	7	19.5445	732.872	104.696
FH+CC	4	30	11	1	Trask-Rock	Age3Plus	11	45.2248	15304.4	1391.31
FH+CC	5	30	11	1	Trask-Rock	Age0	42	22.6191	8877.97	211.38
FH+CC	5	30	11	1	Trask-Rock	Age1	20	26.6062	5314.26	265.713
FH+CC	5	30	11	1	Trask-Rock	Age2	9	32.7613	4883.26	542.584
FH+CC	5	30	11	1	Trask-Rock	Age3Plus	11	41.5908	15732.6	1430.24
FH+CC	1	30	11	1	Trask-UM	Age0	95	17.7639	9849.52	103.679
FH+CC	1	30	11	1	Trask-UM	Age1	36	19.6399	5814.64	161.518
FH+CC	1	30	11	1	Trask-UM	Age2	20	25.9415	6689.51	334.475
FH+CC	1	30	11	1	Trask-UM	Age3Plus	12	36.0589	8875.6	739.634
FH+CC	2	30	11	1	Trask-UM	Age0	93	17.4402	8872.66	95.4049
FH+CC	2	30	11	1	Trask-UM	Age1	39	17.8181	4013.01	102.898
FH+CC	2	30	11	1	Trask-UM	Age2	16	25.2847	4213.99	263.375
FH+CC	2	30	11	1	Trask-UM	Age3Plus	12	25.4401	4077.65	339.804
FH+CC	3	30	11	1	Trask-UM	Age0	104	17.1772	9303.02	89.4521
FH+CC	3	30	11	1	Trask-UM	Age1	38	20.366	6259.04	164.712
FH+CC	3	30	11	1	Trask-UM	Age2	13	25.2694	3221.53	247.81
FH+CC	3	30	11	1	Trask-UM	Age3Plus	17	35.1069	27808.4	1635.79
FH+CC	4	30	11	1	Trask-UM	Age0	95	16.7741	7953.88	83.7251
FH+CC	4	30	11	1	Trask-UM	Age1	34	17.4507	3290.62	96.7831
FH+CC	4	30	11	1	Trask-UM	Age2	14	30.9725	5954.25	425.303
FH+CC	4	30	11	1	Trask-UM	Age3Plus	14	43.3118	15431.1	1102.22
FH+CC	5	30	11	1	Trask-UM	Age0	90	19.6887	12725.9	141.399
FH+CC	5	30	11	1	Trask-UM	Age1	37	17.1324	3180.51	85.9596
FH+CC	5	30	11	1	Trask-UM	Age2	15	23.4821	3692.39	246.159
FH+CC	5	30	11	1	Trask-UM	Age3Plus	15	38.7922	12860.5	857.366
baseline	1	6	12	1	Trask-Gus	Age0	34	10.3281	449.38	13.217
baseline	1	6	12	1	Trask-Gus	Age1	18	20.2779	1761.36	97.8535
baseline	1	6	12	1	Trask-Gus	Age2	1	28.3185	263.386	263.386
baseline	1	6	12	1	Trask-Gus	Age3Plus	0	0	0	0
baseline	2	6	12	1	Trask-Gus	Age0	34	10.6296	488.457	14.3664
baseline	2	6	12	1	Trask-Gus	Age1	9	19.5078	782.517	86.9463
baseline	2	6	12	1	Trask-Gus	Age2	3	25.0492	548.497	182.832
baseline	2	6	12	1	Trask-Gus	Age3Plus	3	32.9324	1254.57	418.19
baseline	3	6	12	1	Trask-Gus	Age0	41	10.6697	592.122	14.442
baseline	3	6	12	1	Trask-Gus	Age1	10	17.804	662.35	66.235
baseline	3	6	12	1	Trask-Gus	Age2	4	28.5411	1072.99	268.246
baseline	3	6	12	1	Trask-Gus	Age3Plus	3	34.4165	1454.01	484.671
baseline	4	6	12	1	Trask-Gus	Age0	14	10.3957	192.72	13.7657
baseline	4	6	12	1	Trask-Gus	Age1	10	18.9757	799.035	79.9035
baseline	4	6	12	1	Trask-Gus	Age2	2	25.5656	383.441	191.72
baseline	4	6	12	1	Trask-Gus	Age3Plus	3	34.5383	1450.46	483.486
baseline	5	6	12	1	Trask-Gus	Age0	42	10.679	608.856	14.4966
baseline	5	6	12	1	Trask-Gus	Age1	11	18.5388	822.171	74.7428
baseline	5	6	12	1	Trask-Gus	Age2	1	23.5551	148.041	148.041
baseline	5	6	12	1	Trask-Gus	Age3Plus	4	35.6363	2134.59	533.649
FH	1	6	12	1	Trask-Gus	Age0	24	10.6021	350.605	14.6086
FH	1	6	12	1	Trask-Gus	Age1	10	18.4378	736.901	73.6901
FH	1	6	12	1	Trask-Gus	Age2	3	24.7875	529.345	176.448
FH	1	6	12	1	Trask-Gus	Age3Plus	7	33.3412	3422.63	488.948
FH	2	6	12	1	Trask-Gus	Age0	32	10.5066	444.009	13.8753
FH	2	6	12	1	Trask-Gus	Age1	11	19.1108	898.688	81.6989
FH	2	6	12	1	Trask-Gus	Age2	1	23.3103	142.12	142.12
FH	2	6	12	1	Trask-Gus	Age3Plus	5	32.9957	2185.93	437.186
FH	3	6	12	1	Trask-Gus	Age0	28	10.4153	378.903	13.5323
FH	3	6	12	1	Trask-Gus	Age1	12	18.481	907.997	75.6664
FH	3	6	12	1	Trask-Gus	Age2	3	25.7003	603.507	201.169
FH	3	6	12	1	Trask-Gus	Age3Plus	4	35.0923	2166.34	541.584
FH	4	6	12	1	Trask-Gus	Age0	17	10.5394	239.094	14.0643
FH	4	6	12	1	Trask-Gus	Age1	15	19.5826	1317.63	87.8418
FH	4	6	12	1	Trask-Gus	Age2	4	25.4214	774.745	193.686
FH	4	6	12	1	Trask-Gus	Age3Plus	3	37.2062	1838.08	612.693
FH	5	6	12	1	Trask-Gus	Age0	31	10.5658	447.226	14.4267
FH	5	6	12	1	Trask-Gus	Age1	10	18.4309	742.769	74.2769
FH	5	6	12	1	Trask-Gus	Age2	3	24.9307	535.613	178.538
FH	5	6	12	1	Trask-Gus	Age3Plus	2	32.3647	784.524	392.262
CC	1	6	12	1	Trask-Gus	Age0	47	11.6191	887.444	18.8818
CC	1	6	12	1	Trask-Gus	Age1	10	20.2315	969.543	96.9543
CC	1	6	12	1	Trask-Gus	Age2	1	24.8787	179.055	179.055
CC	1	6	12	1	Trask-Gus	Age3Plus	2	34.7901	988.737	494.368
CC	2	6	12	1	Trask-Gus	Age0	35	11.4589	633.153	18.0901
CC	2	6	12	1	Trask-Gus	Age1	4	19.3558	339.035	84.7587
CC	2	6	12	1	Trask-Gus	Age2	3	22.0251	387.147	129.049
CC	2	6	12	1	Trask-Gus	Age3Plus	4	36.8273	2313.45	578.363
CC	3	6	12	1	Trask-Gus	Age0	25	11.038	402.438	16.0975
CC	3	6	12	1	Trask-Gus	Age1	11	19.8763	1028.86	93.533
CC	3	6	12	1	Trask-Gus	Age2	1	23.47	144.605	144.605
CC	3	6	12	1	Trask-Gus	Age3Plus	3	33.3917	1291.5	430.5
CC	4	6	12	1	Trask-Gus	Age0	42	11.3488	738.971	17.5946
CC	4	6	12	1	Trask-Gus	Age1	4	19.9841	372.858	93.2144
CC	4	6	12	1	Trask-Gus	Age2	1	22.7695	131.258	131.258
CC	4	6	12	1	Trask-Gus	Age3Plus	4	36.9843	2325.65	581.412
CC	5	6	12	1	Trask-Gus	Age0	20	10.9737	316.566	15.8283
CC	5	6	12	1	Trask-Gus	Age1	11	20.7457	1178.36	107.123
CC	5	6	12	1	Trask-Gus	Age2	2	24.3082	329.965	164.982
CC	5	6	12	1	Trask-Gus	Age3Plus	3	32.2958	1208.32	402.773
FH+CC	1	6	12	1	Trask-Gus	Age0	14	11.4151	250.012	17.858
FH+CC	1	6	12	1	Trask-Gus	Age1	13	21.8496	1619.09	124.545
FH+CC	1	6	12	1	Trask-Gus	Age2	2	23.7408	311.486	155.743
FH+CC	1	6	12	1	Trask-Gus	Age3Plus	3	35.4797	1637.27	545.757
FH+CC	2	6	12	1	Trask-Gus	Age0	20	11.6511	380.764	19.0382
FH+CC	2	6	12	1	Trask-Gus	Age1	12	21.6868	1436.94	119.745
FH+CC	2	6	12	1	Trask-Gus	Age2	1	27.6291	244.735	244.735
FH+CC	2	6	12	1	Trask-Gus	Age3Plus	3	34.3875	1470.89	490.297
FH+CC	3	6	12	1	Trask-Gus	Age0	41	12.1174	878.185	21.4191
FH+CC	3	6	12	1	Trask-Gus	Age1	7	20.032	667.855	95.4078
FH+CC	3	6	12	1	Trask-Gus	Age2	1	20.652	102.513	102.513
FH+CC	3	6	12	1	Trask-Gus	Age3Plus	5	33.5214	2273.31	454.662
FH+CC	4	6	12	1	Trask-Gus	Age0	53	11.9733	1106.08	20.8694
FH+CC	4	6	12	1	Trask-Gus	Age1	5	18.5529	374.576	74.9153
FH+CC	4	6	12	1	Trask-Gus	Age2	3	26.2718	636.641	212.214
FH+CC	4	6	12	1	Trask-Gus	Age3Plus	3	34.8269	1462.02	487.339
FH+CC	5	6	12	1	Trask-Gus	Age0	46	11.5972	871.441	18.9444
FH+CC	5	6	12	1	Trask-Gus	Age1	7	19.0783	568.356	81.1937
FH+CC	5	6	12	1	Trask-Gus	Age2	4	29.1921	1229.68	307.419
FH+CC	5	6	12	1	Trask-Gus	Age3Plus	0	0	0	0
baseline	1	30	12	1	Trask-Pothole	Age0	22	23.0816	3812.1	173.277
baseline	1	30	12	1	Trask-Pothole	Age1	10	28.8378	2544.75	254.475
baseline	1	30	12	1	Trask-Pothole	Age2	5	22.0682	600.346	120.069
baseline	1	30	12	1	Trask-Pothole	Age3Plus	9	59.8051	31904.7	3544.97
baseline	2	30	12	1	Trask-Pothole	Age0	18	24.9622	4103.73	227.985
baseline	2	30	12	1	Trask-Pothole	Age1	9	27.7288	2990.6	332.289
baseline	2	30	12	1	Trask-Pothole	Age2	5	39.6433	2903.9	580.781
baseline	2	30	12	1	Trask-Pothole	Age3Plus	7	32.5744	3604.67	514.952
baseline	3	30	12	1	Trask-Pothole	Age0	25	24.6056	6321.5	252.86
baseline	3	30	12	1	Trask-Pothole	Age1	8	27.0359	2410.43	301.304
baseline	3	30	12	1	Trask-Pothole	Age2	6	37.7312	3468.96	578.16
baseline	3	30	12	1	Trask-Pothole	Age3Plus	3	40.8456	2124.97	708.324
baseline	4	30	12	1	Trask-Pothole	Age0	28	26.3139	6835.31	244.118
baseline	4	30	12	1	Trask-Pothole	Age1	6	23.1145	1474.87	245.812
baseline	4	30	12	1	Trask-Pothole	Age2	5	43.3749	4031.95	806.39
baseline	4	30	12	1	Trask-Pothole	Age3Plus	4	34.3289	2483.48	620.869
baseline	5	30	12	1	Trask-Pothole	Age0	21	21.1875	3146.67	149.841
baseline	5	30	12	1	Trask-Pothole	Age1	7	20.7074	896.188	128.027
baseline	5	30	12	1	Trask-Pothole	Age2	6	32.4705	2464.6	410.767
baseline	5	30	12	1	Trask-Pothole	Age3Plus	7	41.4739	6139.38	877.055
baseline	1	30	12	1	Trask-Rock	Age0	35	24.5945	7673.59	219.245
baseline	1	30	12	1	Trask-Rock	Age1	17	22.5	2826.84	166.285
baseline	1	30	12	1	Trask-Rock	Age2	7	33.7398	3598.81	514.116
baseline	1	30	12	1	Trask-Rock	Age3Plus	8	47.362	10520.4	1315.05
baseline	2	30	12	1	Trask-Rock	Age0	31	22.6066	5183.28	167.202
baseline	2	30	12	1	Trask-Rock	Age1	12	25.6031	2756.18	229.681
baseline	2	30	12	1	Trask-Rock	Age2	7	23.5771	943.653	134.808
baseline	2	30	12	1	Trask-Rock	Age3Plus	8	62.7383	25219.7	3152.46
baseline	3	30	12	1	Trask-Rock	Age0	28	21.1924	4520.72	161.454
baseline	3	30	12	1	Trask-Rock	Age1	17	28.2086	3990.12	234.713
baseline	3	30	12	1	Trask-Rock	Age2	8	40.5537	5870.92	733.866
baseline	3	30	12	1	Trask-Rock	Age3Plus	12	51.4357	21516.4	1793.03
baseline	4	30	12	1	Trask-Rock	Age0	32	23.1217	6182.01	193.188
baseline	4	30	12	1	Trask-Rock	Age1	11	22.3688	1816.58	165.144
baseline	4	30	12	1	Trask-Rock	Age2	6	20.1469	666.013	111.002
baseline	4	30	12	1	Trask-Rock	Age3Plus	8	43.3682	9291.86	1161.48
baseline	5	30	12	1	Trask-Rock	Age0	27	24.1475	6453.35	239.013
baseline	5	30	12	1	Trask-Rock	Age1	11	25.0972	2679.47	243.588
baseline	5	30	12	1	Trask-Rock	Age2	7	33.3914	3576.6	510.943
baseline	5	30	12	1	Trask-Rock	Age3Plus	9	40.0821	11932	1325.78
baseline	1	30	12	1	Trask-UM	Age0	71	17.6734	7279.66	102.53
baseline	1	30	12	1	Trask-UM	Age1	28	20.6141	5076.05	181.288
baseline	1	30	12	1	Trask-UM	Age2	15	23.2906	3304.91	220.327
baseline	1	30	12	1	Trask-UM	Age3Plus	6	45.1273	6839.54	1139.92
baseline	2	30	12	1	Trask-UM	Age0	74	16.9998	6551.52	88.5341
baseline	2	30	12	1	Trask-UM	Age1	28	16.8304	2107.01	75.2505
baseline	2	30	12	1	Trask-UM	Age2	14	25.4519	3721.27	265.805
baseline	2	30	12	1	Trask-UM	Age3Plus	9	24.6159	3241.33	360.148
baseline	3	30	12	1	Trask-UM	Age0	74	17.1351	6636.4	89.6811
baseline	3	30	12	1	Trask-UM	Age1	32	19.1176	4317.97	134.937
baseline	3	30	12	1	Trask-UM	Age2	8	23.1276	1488.5	186.062
baseline	3	30	12	1	Trask-UM	Age3Plus	13	32.8054	7805.28	600.406
baseline	4	30	12	1	Trask-UM	Age0	70	18.5526	7480.25	106.861
baseline	4	30	12	1	Trask-UM	Age1	33	16.0917	2231.84	67.6316
baseline	4	30	12	1	Trask-UM	Age2	12	22.3307	2634.16	219.514
baseline	4	30	12	1	Trask-UM	Age3Plus	13	37.3123	10166.8	782.065
baseline	5	30	12	1	Trask-UM	Age0	68	18.4606	7880.2	115.885
baseline	5	30	12	1	Trask-UM	Age1	37	17.7118	4167.57	112.637
baseline	5	30	12	1	Trask-UM	Age2	15	24.2647	3336.75	222.45
baseline	5	30	12	1	Trask-UM	Age3Plus	9	28.9307	5980.41	664.49
FH	1	30	12	1	Trask-Pothole	Age0	22	23.0816	3812.1	173.277
FH	1	30	12	1	Trask-Pothole	Age1	10	28.8378	2544.75	254.475
FH	1	30	12	1	Trask-Pothole	Age2	5	22.0682	600.346	120.069
FH	1	30	12	1	Trask-Pothole	Age3Plus	9	59.8051	31904.7	3544.97
FH	2	30	12	1	Trask-Pothole	Age0	18	24.9622	4103.73	227.985
FH	2	30	12	1	Trask-Pothole	Age1	9	27.7288	2990.6	332.289
FH	2	30	12	1	Trask-Pothole	Age2	5	39.6433	2903.9	580.781
FH	2	30	12	1	Trask-Pothole	Age3Plus	7	32.5744	3604.67	514.952
FH	3	30	12	1	Trask-Pothole	Age0	25	24.6056	6321.5	252.86
FH	3	30	12	1	Trask-Pothole	Age1	8	27.0359	2410.43	301.304
FH	3	30	12	1	Trask-Pothole	Age2	6	37.7312	3468.96	578.16
FH	3	30	12	1	Trask-Pothole	Age3Plus	3	40.8456	2124.97	708.324
FH	4	30	12	1	Trask-Pothole	Age0	28	26.3139	6835.31	244.118
FH	4	30	12	1	Trask-Pothole	Age1	6	23.1145	1474.87	245.812
FH	4	30	12	1	Trask-Pothole	Age2	5	43.3749	4031.95	806.39
FH	4	30	12	1	Trask-Pothole	Age3Plus	4	34.3289	2483.48	620.869
FH	5	30	12	1	Trask-Pothole	Age0	21	21.1875	3146.67	149.841
FH	5	30	12	1	Trask-Pothole	Age1	7	20.7074	896.188	128.027
FH	5	30	12	1	Trask-Pothole	Age2	6	32.4705	2464.6	410.767
FH	5	30	12	1	Trask-Pothole	Age3Plus	7	41.4739	6139.38	877.055
FH	1	30	12	1	Trask-Rock	Age0	35	24.5945	7673.59	219.245
FH	1	30	12	1	Trask-Rock	Age1	17	22.5	2826.84	166.285
FH	1	30	12	1	Trask-Rock	Age2	7	33.7398	3598.81	514.116
FH	1	30	12	1	Trask-Rock	Age3Plus	8	47.362	10520.4	1315.05
FH	2	30	12	1	Trask-Rock	Age0	31	22.6066	5183.28	167.202
FH	2	30	12	1	Trask-Rock	Age1	12	25.6031	2756.18	229.681
FH	2	30	12	1	Trask-Rock	Age2	7	23.5771	943.653	134.808
FH	2	30	12	1	Trask-Rock	Age3Plus	8	62.7383	25219.7	3152.46
FH	3	30	12	1	Trask-Rock	Age0	28	21.1924	4520.72	161.454
FH	3	30	12	1	Trask-Rock	Age1	17	28.2086	3990.12	234.713
FH	3	30	12	1	Trask-Rock	Age2	8	40.5537	5870.92	733.866
FH	3	30	12	1	Trask-Rock	Age3Plus	12	51.4357	21516.4	1793.03
FH	4	30	12	1	Trask-Rock	Age0	32	23.1217	6182.01	193.188
FH	4	30	12	1	Trask-Rock	Age1	11	22.3688	1816.58	165.144
FH	4	30	12	1	Trask-Rock	Age2	6	20.1469	666.013	111.002
FH	4	30	12	1	Trask-Rock	Age3Plus	8	43.3682	9291.86	1161.48
FH	5	30	12	1	Trask-Rock	Age0	27	24.1475	6453.35	239.013
FH	5	30	12	1	Trask-Rock	Age1	11	25.0972	2679.47	243.588
FH	5	30	12	1	Trask-Rock	Age2	7	33.3914	3576.6	510.943
FH	5	30	12	1	Trask-Rock	Age3Plus	9	40.0821	11932	1325.78
FH	1	30	12	1	Trask-UM	Age0	71	17.6734	7279.66	102.53
FH	1	30	12	1	Trask-UM	Age1	28	20.6141	5076.05	181.288
FH	1	30	12	1	Trask-UM	Age2	15	23.2906	3304.91	220.327
FH	1	30	12	1	Trask-UM	Age3Plus	6	45.1273	6839.54	1139.92
FH	2	30	12	1	Trask-UM	Age0	74	16.9998	6551.52	88.5341
FH	2	30	12	1	Trask-UM	Age1	28	16.8304	2107.01	75.2505
FH	2	30	12	1	Trask-UM	Age2	14	25.4519	3721.27	265.805
FH	2	30	12	1	Trask-UM	Age3Plus	9	24.6159	3241.33	360.148
FH	3	30	12	1	Trask-UM	Age0	73	16.6348	5729.92	78.492
FH	3	30	12	1	Trask-UM	Age1	30	17.2918	2675.57	89.1858
FH	3	30	12	1	Trask-UM	Age2	10	32.6586	4721.96	472.196
FH	3	30	12	1	Trask-UM	Age3Plus	12	43.0575	13080.5	1090.04
FH	4	30	12	1	Trask-UM	Age0	70	18.5526	7480.25	106.861
FH	4	30	12	1	Trask-UM	Age1	33	16.0917	2231.84	67.6316
FH	4	30	12	1	Trask-UM	Age2	12	22.3307	2634.16	219.514
FH	4	30	12	1	Trask-UM	Age3Plus	13	37.3123	10166.8	782.065
FH	5	30	12	1	Trask-UM	Age0	86	16.7984	7155.27	83.2008
FH	5	30	12	1	Trask-UM	Age1	30	19.6866	3986.52	132.884
FH	5	30	12	1	Trask-UM	Age2	5	35.3508	3071.6	614.321
FH	5	30	12	1	Trask-UM	Age3Plus	9	33.2738	7944.29	882.698
CC	1	30	12	1	Trask-Pothole	Age0	22	23.0816	3812.1	173.277
CC	1	30	12	1	Trask-Pothole	Age1	10	28.8378	2544.75	254.475
CC	1	30	12	1	Trask-Pothole	Age2	5	22.0682	600.346	120.069
CC	1	30	12	1	Trask-Pothole	Age3Plus	9	59.8051	31904.7	3544.97
CC	2	30	12	1	Trask-Pothole	Age0	18	24.9622	4103.73	227.985
CC	2	30	12	1	Trask-Pothole	Age1	9	27.7288	2990.6	332.289
CC	2	30	12	1	Trask-Pothole	Age2	5	39.6433	2903.9	580.781
CC	2	30	12	1	Trask-Pothole	Age3Plus	7	32.5744	3604.67	514.952
CC	3	30	12	1	Trask-Pothole	Age0	25	24.6056	6321.5	252.86
CC	3	30	12	1	Trask-Pothole	Age1	8	27.0359	2410.43	301.304
CC	3	30	12	1	Trask-Pothole	Age2	6	37.7312	3468.96	578.16
CC	3	30	12	1	Trask-Pothole	Age3Plus	3	40.8456	2124.97	708.324
CC	4	30	12	1	Trask-Pothole	Age0	28	26.3139	6835.31	244.118
CC	4	30	12	1	Trask-Pothole	Age1	6	23.1145	1474.87	245.812
CC	4	30	12	1	Trask-Pothole	Age2	5	43.3749	4031.95	806.39
CC	4	30	12	1	Trask-Pothole	Age3Plus	4	34.3289	2483.48	620.869
CC	5	30	12	1	Trask-Pothole	Age0	21	21.1875	3146.67	149.841
CC	5	30	12	1	Trask-Pothole	Age1	7	20.7074	896.188	128.027
CC	5	30	12	1	Trask-Pothole	Age2	6	32.4705	2464.6	410.767
CC	5	30	12	1	Trask-Pothole	Age3Plus	7	41.4739	6139.38	877.055
CC	1	30	12	1	Trask-Rock	Age0	35	24.5945	7673.59	219.245
CC	1	30	12	1	Trask-Rock	Age1	17	22.5	2826.84	166.285
CC	1	30	12	1	Trask-Rock	Age2	7	33.7398	3598.81	514.116
CC	1	30	12	1	Trask-Rock	Age3Plus	8	47.362	10520.4	1315.05
CC	2	30	12	1	Trask-Rock	Age0	31	22.6066	5183.28	167.202
CC	2	30	12	1	Trask-Rock	Age1	12	25.6031	2756.18	229.681
CC	2	30	12	1	Trask-Rock	Age2	7	23.5771	943.653	134.808
CC	2	30	12	1	Trask-Rock	Age3Plus	8	62.7383	25219.7	3152.46
CC	3	30	12	1	Trask-Rock	Age0	28	21.1924	4520.72	161.454
CC	3	30	12	1	Trask-Rock	Age1	17	28.2086	3990.12	234.713
CC	3	30	12	1	Trask-Rock	Age2	8	40.5537	5870.92	733.866
CC	3	30	12	1	Trask-Rock	Age3Plus	12	51.4357	21516.4	1793.03
CC	4	30	12	1	Trask-Rock	Age0	32	23.1217	6182.01	193.188
CC	4	30	12	1	Trask-Rock	Age1	11	22.3688	1816.58	165.144
CC	4	30	12	1	Trask-Rock	Age2	6	20.1469	666.013	111.002
CC	4	30	12	1	Trask-Rock	Age3Plus	8	43.3682	9291.86	1161.48
CC	5	30	12	1	Trask-Rock	Age0	27	24.1475	6453.35	239.013
CC	5	30	12	1	Trask-Rock	Age1	11	25.0972	2679.47	243.588
CC	5	30	12	1	Trask-Rock	Age2	7	33.3914	3576.6	510.943
CC	5	30	12	1	Trask-Rock	Age3Plus	9	40.0821	11932	1325.78
CC	1	30	12	1	Trask-UM	Age0	71	17.6734	7279.66	102.53
CC	1	30	12	1	Trask-UM	Age1	28	20.6141	5076.05	181.288
CC	1	30	12	1	Trask-UM	Age2	15	23.2906	3304.91	220.327
CC	1	30	12	1	Trask-UM	Age3Plus	6	45.1273	6839.54	1139.92
CC	2	30	12	1	Trask-UM	Age0	74	16.9998	6551.52	88.5341
CC	2	30	12	1	Trask-UM	Age1	28	16.8304	2107.01	75.2505
CC	2	30	12	1	Trask-UM	Age2	14	25.4519	3721.27	265.805
CC	2	30	12	1	Trask-UM	Age3Plus	9	24.6159	3241.33	360.148
CC	3	30	12	1	Trask-UM	Age0	74	17.1351	6636.4	89.6811
CC	3	30	12	1	Trask-UM	Age1	32	19.1176	4317.97	134.937
CC	3	30	12	1	Trask-UM	Age2	8	23.1276	1488.5	186.062
CC	3	30	12	1	Trask-UM	Age3Plus	13	32.8054	7805.28	600.406
CC	4	30	12	1	Trask-UM	Age0	70	18.5526	7480.25	106.861
CC	4	30	12	1	Trask-UM	Age1	33	16.0917	2231.84	67.6316
CC	4	30	12	1	Trask-UM	Age2	12	22.3307	2634.16	219.514
CC	4	30	12	1	Trask-UM	Age3Plus	13	37.3123	10166.8	782.065
CC	5	30	12	1	Trask-UM	Age0	68	18.4606	7880.2	115.885
CC	5	30	12	1	Trask-UM	Age1	37	17.7118	4167.57	112.637
CC	5	30	12	1	Trask-UM	Age2	15	24.2647	3336.75	222.45
CC	5	30	12	1	Trask-UM	Age3Plus	9	28.9307	5980.41	664.49
FH+CC	1	30	12	1	Trask-Pothole	Age0	22	23.0816	3812.1	173.277
FH+CC	1	30	12	1	Trask-Pothole	Age1	10	28.8378	2544.75	254.475
FH+CC	1	30	12	1	Trask-Pothole	Age2	5	22.0682	600.346	120.069
FH+CC	1	30	12	1	Trask-Pothole	Age3Plus	9	59.8051	31904.7	3544.97
FH+CC	2	30	12	1	Trask-Pothole	Age0	18	24.9622	4103.73	227.985
FH+CC	2	30	12	1	Trask-Pothole	Age1	9	27.7288	2990.6	332.289
FH+CC	2	30	12	1	Trask-Pothole	Age2	5	39.6433	2903.9	580.781
FH+CC	2	30	12	1	Trask-Pothole	Age3Plus	7	32.5744	3604.67	514.952
FH+CC	3	30	12	1	Trask-Pothole	Age0	25	24.6056	6321.5	252.86
FH+CC	3	30	12	1	Trask-Pothole	Age1	8	27.0359	2410.43	301.304
FH+CC	3	30	12	1	Trask-Pothole	Age2	6	37.7312	3468.96	578.16
FH+CC	3	30	12	1	Trask-Pothole	Age3Plus	3	40.8456	2124.97	708.324
FH+CC	4	30	12	1	Trask-Pothole	Age0	28	26.3139	6835.31	244.118
FH+CC	4	30	12	1	Trask-Pothole	Age1	6	23.1145	1474.87	245.812
FH+CC	4	30	12	1	Trask-Pothole	Age2	5	43.3749	4031.95	806.39
FH+CC	4	30	12	1	Trask-Pothole	Age3Plus	4	34.3289	2483.48	620.869
FH+CC	5	30	12	1	Trask-Pothole	Age0	21	21.1875	3146.67	149.841
FH+CC	5	30	12	1	Trask-Pothole	Age1	7	20.7074	896.188	128.027
FH+CC	5	30	12	1	Trask-Pothole	Age2	6	32.4705	2464.6	410.767
FH+CC	5	30	12	1	Trask-Pothole	Age3Plus	7	41.4739	6139.38	877.055
FH+CC	1	30	12	1	Trask-Rock	Age0	35	24.5945	7673.59	219.245
FH+CC	1	30	12	1	Trask-Rock	Age1	17	22.5	2826.84	166.285
FH+CC	1	30	12	1	Trask-Rock	Age2	7	33.7398	3598.81	514.116
FH+CC	1	30	12	1	Trask-Rock	Age3Plus	8	47.362	10520.4	1315.05
FH+CC	2	30	12	1	Trask-Rock	Age0	31	22.6066	5183.28	167.202
FH+CC	2	30	12	1	Trask-Rock	Age1	12	25.6031	2756.18	229.681
FH+CC	2	30	12	1	Trask-Rock	Age2	7	23.5771	943.653	134.808
FH+CC	2	30	12	1	Trask-Rock	Age3Plus	8	62.7383	25219.7	3152.46
FH+CC	3	30	12	1	Trask-Rock	Age0	28	21.1924	4520.72	161.454
FH+CC	3	30	12	1	Trask-Rock	Age1	17	28.2086	3990.12	234.713
FH+CC	3	30	12	1	Trask-Rock	Age2	8	40.5537	5870.92	733.866
FH+CC	3	30	12	1	Trask-Rock	Age3Plus	12	51.4357	21516.4	1793.03
FH+CC	4	30	12	1	Trask-Rock	Age0	32	23.1217	6182.01	193.188
FH+CC	4	30	12	1	Trask-Rock	Age1	11	22.3688	1816.58	165.144
FH+CC	4	30	12	1	Trask-Rock	Age2	6	20.1469	666.013	111.002
FH+CC	4	30	12	1	Trask-Rock	Age3Plus	8	43.3682	9291.86	1161.48
FH+CC	5	30	12	1	Trask-Rock	Age0	27	24.1475	6453.35	239.013
FH+CC	5	30	12	1	Trask-Rock	Age1	11	25.0972	2679.47	243.588
FH+CC	5	30	12	1	Trask-Rock	Age2	7	33.3914	3576.6	510.943
FH+CC	5	30	12	1	Trask-Rock	Age3Plus	9	40.0821	11932	1325.78
FH+CC	1	30	12	1	Trask-UM	Age0	71	17.6734	7279.66	102.53
FH+CC	1	30	12	1	Trask-UM	Age1	28	20.6141	5076.05	181.288
FH+CC	1	30	12	1	Trask-UM	Age2	15	23.2906	3304.91	220.327
FH+CC	1	30	12	1	Trask-UM	Age3Plus	6	45.1273	6839.54	1139.92
FH+CC	2	30	12	1	Trask-UM	Age0	74	16.9998	6551.52	88.5341
FH+CC	2	30	12	1	Trask-UM	Age1	28	16.8304	2107.01	75.2505
FH+CC	2	30	12	1	Trask-UM	Age2	14	25.4519	3721.27	265.805
FH+CC	2	30	12	1	Trask-UM	Age3Plus	9	24.6159	3241.33	360.148
FH+CC	3	30	12	1	Trask-UM	Age0	74	17.1351	6636.4	89.6811
FH+CC	3	30	12	1	Trask-UM	Age1	32	19.1176	4317.97	134.937
FH+CC	3	30	12	1	Trask-UM	Age2	8	23.1276	1488.5	186.062
FH+CC	3	30	12	1	Trask-UM	Age3Plus	13	32.8054	7805.28	600.406
FH+CC	4	30	12	1	Trask-UM	Age0	73	16.6348	5729.92	78.492
FH+CC	4	30	12	1	Trask-UM	Age1	30	17.2918	2675.57	89.1858
FH+CC	4	30	12	1	Trask-UM	Age2	10	32.6586	4721.96	472.196
FH+CC	4	30	12	1	Trask-UM	Age3Plus	12	43.0575	13080.5	1090.04
FH+CC	5	30	12	1	Trask-UM	Age0	70	18.5526	7480.25	106.861
FH+CC	5	30	12	1	Trask-UM	Age1	33	16.0917	2231.84	67.6316
FH+CC	5	30	12	1	Trask-UM	Age2	12	22.3307	2634.16	219.514
FH+CC	5	30	12	1	Trask-UM	Age3Plus	13	37.3123	10166.8	782.065
baseline	1	5	1	2	Trask-Gus	Age0	0	0	0	0
baseline	1	5	1	2	Trask-Gus	Age1	32	10.5874	443.991	13.8747
baseline	1	5	1	2	Trask-Gus	Age2	16	20.5055	1561.86	97.6163
baseline	1	5	1	2	Trask-Gus	Age3Plus	1	28.4141	257.79	257.79
baseline	2	5	1	2	Trask-Gus	Age0	0	0	0	0
baseline	2	5	1	2	Trask-Gus	Age1	32	10.9318	486.981	15.2182
baseline	2	5	1	2	Trask-Gus	Age2	8	19.6334	682.903	85.3629
baseline	2	5	1	2	Trask-Gus	Age3Plus	6	29.0878	1759.61	293.268
baseline	3	5	1	2	Trask-Gus	Age0	0	0	0	0
baseline	3	5	1	2	Trask-Gus	Age1	38	10.9322	574.85	15.1276
baseline	3	5	1	2	Trask-Gus	Age2	8	17.9378	521.952	65.244
baseline	3	5	1	2	Trask-Gus	Age3Plus	7	31.1591	2461.93	351.704
baseline	4	5	1	2	Trask-Gus	Age0	0	0	0	0
baseline	4	5	1	2	Trask-Gus	Age1	12	10.5181	167.434	13.9529
baseline	4	5	1	2	Trask-Gus	Age2	10	19.1513	791.026	79.1026
baseline	4	5	1	2	Trask-Gus	Age3Plus	5	31.0334	1789.95	357.99
baseline	5	5	1	2	Trask-Gus	Age0	0	0	0	0
baseline	5	5	1	2	Trask-Gus	Age1	39	10.9565	594.527	15.2443
baseline	5	5	1	2	Trask-Gus	Age2	11	18.7007	814.043	74.0039
baseline	5	5	1	2	Trask-Gus	Age3Plus	5	33.2365	2229.79	445.957
FH	1	5	1	2	Trask-Gus	Age0	0	0	0	0
FH	1	5	1	2	Trask-Gus	Age1	23	10.9245	355.161	15.4418
FH	1	5	1	2	Trask-Gus	Age2	10	18.5605	725.44	72.544
FH	1	5	1	2	Trask-Gus	Age3Plus	10	30.8363	3860.34	386.034
FH	2	5	1	2	Trask-Gus	Age0	0	0	0	0
FH	2	5	1	2	Trask-Gus	Age1	32	10.7702	466.031	14.5635
FH	2	5	1	2	Trask-Gus	Age2	11	19.2614	886.354	80.5776
FH	2	5	1	2	Trask-Gus	Age3Plus	5	31.579	1950.22	390.043
FH	3	5	1	2	Trask-Gus	Age0	0	0	0	0
FH	3	5	1	2	Trask-Gus	Age1	26	10.6341	364.581	14.0223
FH	3	5	1	2	Trask-Gus	Age2	12	18.6184	897.16	74.7634
FH	3	5	1	2	Trask-Gus	Age3Plus	7	31.1223	2705.57	386.51
FH	4	5	1	2	Trask-Gus	Age0	0	0	0	0
FH	4	5	1	2	Trask-Gus	Age1	16	10.8272	237.119	14.8199
FH	4	5	1	2	Trask-Gus	Age2	15	19.7261	1300.8	86.7198
FH	4	5	1	2	Trask-Gus	Age3Plus	7	30.4895	2549.13	364.161
FH	5	5	1	2	Trask-Gus	Age0	0	0	0	0
FH	5	5	1	2	Trask-Gus	Age1	31	10.8287	467.736	15.0882
FH	5	5	1	2	Trask-Gus	Age2	9	18.5481	656.83	72.9811
FH	5	5	1	2	Trask-Gus	Age3Plus	5	27.951	1289.05	257.81
CC	1	5	1	2	Trask-Gus	Age0	0	0	0	0
CC	1	5	1	2	Trask-Gus	Age1	46	11.8947	898.552	19.5337
CC	1	5	1	2	Trask-Gus	Age2	9	20.4689	870.738	96.7487
CC	1	5	1	2	Trask-Gus	Age3Plus	3	31.5186	1131.45	377.149
CC	2	5	1	2	Trask-Gus	Age0	0	0	0	0
CC	2	5	1	2	Trask-Gus	Age1	31	11.6636	574.304	18.5259
CC	2	5	1	2	Trask-Gus	Age2	4	19.4936	333.191	83.2977
CC	2	5	1	2	Trask-Gus	Age3Plus	6	29.3001	2059.45	343.242
CC	3	5	1	2	Trask-Gus	Age0	0	0	0	0
CC	3	5	1	2	Trask-Gus	Age1	24	11.2202	394.97	16.4571
CC	3	5	1	2	Trask-Gus	Age2	11	20.0086	1013.44	92.131
CC	3	5	1	2	Trask-Gus	Age3Plus	2	28.2917	547.747	273.874
CC	4	5	1	2	Trask-Gus	Age0	0	0	0	0
CC	4	5	1	2	Trask-Gus	Age1	42	11.5937	763.678	18.1828
CC	4	5	1	2	Trask-Gus	Age2	4	20.0889	364.362	91.0904
CC	4	5	1	2	Trask-Gus	Age3Plus	5	34.1868	2396.63	479.326
CC	5	5	1	2	Trask-Gus	Age0	0	0	0	0
CC	5	5	1	2	Trask-Gus	Age1	19	11.1983	310.813	16.3586
CC	5	5	1	2	Trask-Gus	Age2	11	20.8962	1160.94	105.54
CC	5	5	1	2	Trask-Gus	Age3Plus	5	29.1927	1499.59	299.917
FH+CC	1	5	1	2	Trask-Gus	Age0	0	0	0	0
FH+CC	1	5	1	2	Trask-Gus	Age1	13	11.6103	237.279	18.2522
FH+CC	1	5	1	2	Trask-Gus	Age2	12	21.9959	1473.63	122.802
FH+CC	1	5	1	2	Trask-Gus	Age3Plus	5	30.8419	1909.02	381.804
FH+CC	2	5	1	2	Trask-Gus	Age0	0	0	0	0
FH+CC	2	5	1	2	Trask-Gus	Age1	17	11.9962	340.946	20.0556
FH+CC	2	5	1	2	Trask-Gus	Age2	12	21.8453	1415.19	117.933
FH+CC	2	5	1	2	Trask-Gus	Age3Plus	4	32.7543	1666.6	416.65
FH+CC	3	5	1	2	Trask-Gus	Age0	0	0	0	0
FH+CC	3	5	1	2	Trask-Gus	Age1	39	12.2842	837.535	21.4752
FH+CC	3	5	1	2	Trask-Gus	Age2	7	20.1614	655.465	93.6379
FH+CC	3	5	1	2	Trask-Gus	Age3Plus	6	31.4496	2317.59	386.264
FH+CC	4	5	1	2	Trask-Gus	Age0	0	0	0	0
FH+CC	4	5	1	2	Trask-Gus	Age1	50	12.1409	1046.26	20.9252
FH+CC	4	5	1	2	Trask-Gus	Age2	5	18.6916	368.458	73.6915
FH+CC	4	5	1	2	Trask-Gus	Age3Plus	6	30.6288	2050.4	341.733
FH+CC	5	5	1	2	Trask-Gus	Age0	0	0	0	0
FH+CC	5	5	1	2	Trask-Gus	Age1	46	11.8291	892.435	19.4008
FH+CC	5	5	1	2	Trask-Gus	Age2	7	19.2311	560.897	80.1282
FH+CC	5	5	1	2	Trask-Gus	Age3Plus	4	29.3146	1205.63	301.407
baseline	1	29	1	2	Trask-Pothole	Age0	0	0	0	0
baseline	1	29	1	2	Trask-Pothole	Age1	16	24.1126	3050.69	190.668
baseline	1	29	1	2	Trask-Pothole	Age2	4	23.928	766.16	191.54
baseline	1	29	1	2	Trask-Pothole	Age3Plus	10	49.388	29112	2911.2
baseline	2	29	1	2	Trask-Pothole	Age0	0	0	0	0
baseline	2	29	1	2	Trask-Pothole	Age1	10	23.9395	2551.27	255.127
baseline	2	29	1	2	Trask-Pothole	Age2	7	30.2309	2692.41	384.63
baseline	2	29	1	2	Trask-Pothole	Age3Plus	9	35.334	5055.76	561.751
baseline	3	29	1	2	Trask-Pothole	Age0	0	0	0	0
baseline	3	29	1	2	Trask-Pothole	Age1	15	24.0918	4129.28	275.285
baseline	3	29	1	2	Trask-Pothole	Age2	2	17.6218	110.842	55.421
baseline	3	29	1	2	Trask-Pothole	Age3Plus	8	38.5992	4919.29	614.912
baseline	4	29	1	2	Trask-Pothole	Age0	0	0	0	0
baseline	4	29	1	2	Trask-Pothole	Age1	18	22.6119	3192.46	177.359
baseline	4	29	1	2	Trask-Pothole	Age2	4	20.2699	836.551	209.138
baseline	4	29	1	2	Trask-Pothole	Age3Plus	5	48.3708	5375.2	1075.04
baseline	5	29	1	2	Trask-Pothole	Age0	0	0	0	0
baseline	5	29	1	2	Trask-Pothole	Age1	17	20.3473	2437.79	143.399
baseline	5	29	1	2	Trask-Pothole	Age2	4	19.7752	418.151	104.538
baseline	5	29	1	2	Trask-Pothole	Age3Plus	8	36.7797	5807.92	725.99
baseline	1	29	1	2	Trask-Rock	Age0	0	0	0	0
baseline	1	29	1	2	Trask-Rock	Age1	25	24.0523	5763.77	230.551
baseline	1	29	1	2	Trask-Rock	Age2	15	21.9414	2365.05	157.67
baseline	1	29	1	2	Trask-Rock	Age3Plus	14	40.4763	12683.3	905.953
baseline	2	29	1	2	Trask-Rock	Age0	0	0	0	0
baseline	2	29	1	2	Trask-Rock	Age1	26	22.7629	4482.47	172.403
baseline	2	29	1	2	Trask-Rock	Age2	9	26.9665	2249.64	249.96
baseline	2	29	1	2	Trask-Rock	Age3Plus	11	48.8996	23461.7	2132.88
baseline	3	29	1	2	Trask-Rock	Age0	0	0	0	0
baseline	3	29	1	2	Trask-Rock	Age1	25	20.4379	3819.86	152.794
baseline	3	29	1	2	Trask-Rock	Age2	10	27.1049	2076.89	207.689
baseline	3	29	1	2	Trask-Rock	Age3Plus	18	48.8058	25841.2	1435.62
baseline	4	29	1	2	Trask-Rock	Age0	0	0	0	0
baseline	4	29	1	2	Trask-Rock	Age1	25	22.0678	4080.09	163.204
baseline	4	29	1	2	Trask-Rock	Age2	7	18.801	777.499	111.071
baseline	4	29	1	2	Trask-Rock	Age3Plus	7	30.4797	5204.89	743.555
baseline	5	29	1	2	Trask-Rock	Age0	0	0	0	0
baseline	5	29	1	2	Trask-Rock	Age1	24	23.0871	5201.61	216.734
baseline	5	29	1	2	Trask-Rock	Age2	10	26.212	2601.3	260.13
baseline	5	29	1	2	Trask-Rock	Age3Plus	11	38.4434	13060	1187.27
baseline	1	29	1	2	Trask-UM	Age0	0	0	0	0
baseline	1	29	1	2	Trask-UM	Age1	55	17.3807	5577.41	101.408
baseline	1	29	1	2	Trask-UM	Age2	17	16.2473	1077.39	63.376
baseline	1	29	1	2	Trask-UM	Age3Plus	12	30.6469	7354.57	612.881
baseline	2	29	1	2	Trask-UM	Age0	0	0	0	0
baseline	2	29	1	2	Trask-UM	Age1	51	15.1522	3482.56	68.2854
baseline	2	29	1	2	Trask-UM	Age2	26	16.2337	1707.52	65.6739
baseline	2	29	1	2	Trask-UM	Age3Plus	18	26.4856	6267.5	348.194
baseline	3	29	1	2	Trask-UM	Age0	0	0	0	0
baseline	3	29	1	2	Trask-UM	Age1	63	16.1505	4781.81	75.9017
baseline	3	29	1	2	Trask-UM	Age2	21	18.6071	2092.06	99.6218
baseline	3	29	1	2	Trask-UM	Age3Plus	14	29.5552	7009.35	500.668
baseline	4	29	1	2	Trask-UM	Age0	0	0	0	0
baseline	4	29	1	2	Trask-UM	Age1	59	17.4177	5332.45	90.3805
baseline	4	29	1	2	Trask-UM	Age2	29	16.1748	1950.05	67.2432
baseline	4	29	1	2	Trask-UM	Age3Plus	15	28.043	7508.12	500.541
baseline	5	29	1	2	Trask-UM	Age0	0	0	0	0
baseline	5	29	1	2	Trask-UM	Age1	53	17.8848	5969.55	112.633
baseline	5	29	1	2	Trask-UM	Age2	32	17.4446	3377.39	105.543
baseline	5	29	1	2	Trask-UM	Age3Plus	18	26.92	7778.3	432.128
FH	1	29	1	2	Trask-Pothole	Age0	0	0	0	0
FH	1	29	1	2	Trask-Pothole	Age1	16	24.1126	3050.69	190.668
FH	1	29	1	2	Trask-Pothole	Age2	4	23.928	766.16	191.54
FH	1	29	1	2	Trask-Pothole	Age3Plus	10	49.388	29112	2911.2
FH	2	29	1	2	Trask-Pothole	Age0	0	0	0	0
FH	2	29	1	2	Trask-Pothole	Age1	10	23.9395	2551.27	255.127
FH	2	29	1	2	Trask-Pothole	Age2	7	30.2309	2692.41	384.63
FH	2	29	1	2	Trask-Pothole	Age3Plus	9	35.334	5055.76	561.751
FH	3	29	1	2	Trask-Pothole	Age0	0	0	0	0
FH	3	29	1	2	Trask-Pothole	Age1	15	24.0918	4129.28	275.285
FH	3	29	1	2	Trask-Pothole	Age2	2	17.6218	110.842	55.421
FH	3	29	1	2	Trask-Pothole	Age3Plus	8	38.5992	4919.29	614.912
FH	4	29	1	2	Trask-Pothole	Age0	0	0	0	0
FH	4	29	1	2	Trask-Pothole	Age1	18	22.6119	3192.46	177.359
FH	4	29	1	2	Trask-Pothole	Age2	4	20.2699	836.551	209.138
FH	4	29	1	2	Trask-Pothole	Age3Plus	5	48.3708	5375.2	1075.04
FH	5	29	1	2	Trask-Pothole	Age0	0	0	0	0
FH	5	29	1	2	Trask-Pothole	Age1	17	20.3473	2437.79	143.399
FH	5	29	1	2	Trask-Pothole	Age2	4	19.7752	418.151	104.538
FH	5	29	1	2	Trask-Pothole	Age3Plus	8	36.7797	5807.92	725.99
FH	1	29	1	2	Trask-Rock	Age0	0	0	0	0
FH	1	29	1	2	Trask-Rock	Age1	25	24.0523	5763.77	230.551
FH	1	29	1	2	Trask-Rock	Age2	15	21.9414	2365.05	157.67
FH	1	29	1	2	Trask-Rock	Age3Plus	14	40.4763	12683.3	905.953
FH	2	29	1	2	Trask-Rock	Age0	0	0	0	0
FH	2	29	1	2	Trask-Rock	Age1	26	22.7629	4482.47	172.403
FH	2	29	1	2	Trask-Rock	Age2	9	26.9665	2249.64	249.96
FH	2	29	1	2	Trask-Rock	Age3Plus	11	48.8996	23461.7	2132.88
FH	3	29	1	2	Trask-Rock	Age0	0	0	0	0
FH	3	29	1	2	Trask-Rock	Age1	25	20.4379	3819.86	152.794
FH	3	29	1	2	Trask-Rock	Age2	10	27.1049	2076.89	207.689
FH	3	29	1	2	Trask-Rock	Age3Plus	18	48.8058	25841.2	1435.62
FH	4	29	1	2	Trask-Rock	Age0	0	0	0	0
FH	4	29	1	2	Trask-Rock	Age1	25	22.0678	4080.09	163.204
FH	4	29	1	2	Trask-Rock	Age2	7	18.801	777.499	111.071
FH	4	29	1	2	Trask-Rock	Age3Plus	7	30.4797	5204.89	743.555
FH	5	29	1	2	Trask-Rock	Age0	0	0	0	0
FH	5	29	1	2	Trask-Rock	Age1	24	23.0871	5201.61	216.734
FH	5	29	1	2	Trask-Rock	Age2	10	26.212	2601.3	260.13
FH	5	29	1	2	Trask-Rock	Age3Plus	11	38.4434	13060	1187.27
FH	1	29	1	2	Trask-UM	Age0	0	0	0	0
FH	1	29	1	2	Trask-UM	Age1	55	17.3807	5577.41	101.408
FH	1	29	1	2	Trask-UM	Age2	17	16.2473	1077.39	63.376
FH	1	29	1	2	Trask-UM	Age3Plus	12	30.6469	7354.57	612.881
FH	2	29	1	2	Trask-UM	Age0	0	0	0	0
FH	2	29	1	2	Trask-UM	Age1	51	15.1522	3482.56	68.2854
FH	2	29	1	2	Trask-UM	Age2	26	16.2337	1707.52	65.6739
FH	2	29	1	2	Trask-UM	Age3Plus	18	26.4856	6267.5	348.194
FH	3	29	1	2	Trask-UM	Age0	0	0	0	0
FH	3	29	1	2	Trask-UM	Age1	54	16.378	4201.21	77.8002
FH	3	29	1	2	Trask-UM	Age2	21	14.2072	734.582	34.9801
FH	3	29	1	2	Trask-UM	Age3Plus	14	39.1792	12985.2	927.517
FH	4	29	1	2	Trask-UM	Age0	0	0	0	0
FH	4	29	1	2	Trask-UM	Age1	59	17.4177	5332.45	90.3805
FH	4	29	1	2	Trask-UM	Age2	29	16.1748	1950.05	67.2432
FH	4	29	1	2	Trask-UM	Age3Plus	15	28.043	7508.12	500.541
FH	5	29	1	2	Trask-UM	Age0	0	0	0	0
FH	5	29	1	2	Trask-UM	Age1	69	16.7266	5831.26	84.511
FH	5	29	1	2	Trask-UM	Age2	18	14.8164	737.982	40.999
FH	5	29	1	2	Trask-UM	Age3Plus	9	37.3308	8459.21	939.912
CC	1	29	1	2	Trask-Pothole	Age0	0	0	0	0
CC	1	29	1	2	Trask-Pothole	Age1	16	24.1126	3050.69	190.668
CC	1	29	1	2	Trask-Pothole	Age2	4	23.928	766.16	191.54
CC	1	29	1	2	Trask-Pothole	Age3Plus	10	49.388	29112	2911.2
CC	2	29	1	2	Trask-Pothole	Age0	0	0	0	0
CC	2	29	1	2	Trask-Pothole	Age1	10	23.9395	2551.27	255.127
CC	2	29	1	2	Trask-Pothole	Age2	7	30.2309	2692.41	384.63
CC	2	29	1	2	Trask-Pothole	Age3Plus	9	35.334	5055.76	561.751
CC	3	29	1	2	Trask-Pothole	Age0	0	0	0	0
CC	3	29	1	2	Trask-Pothole	Age1	15	24.0918	4129.28	275.285
CC	3	29	1	2	Trask-Pothole	Age2	2	17.6218	110.842	55.421
CC	3	29	1	2	Trask-Pothole	Age3Plus	8	38.5992	4919.29	614.912
CC	4	29	1	2	Trask-Pothole	Age0	0	0	0	0
CC	4	29	1	2	Trask-Pothole	Age1	18	22.6119	3192.46	177.359
CC	4	29	1	2	Trask-Pothole	Age2	4	20.2699	836.551	209.138
CC	4	29	1	2	Trask-Pothole	Age3Plus	5	48.3708	5375.2	1075.04
CC	5	29	1	2	Trask-Pothole	Age0	0	0	0	0
CC	5	29	1	2	Trask-Pothole	Age1	17	20.3473	2437.79	143.399
CC	5	29	1	2	Trask-Pothole	Age2	4	19.7752	418.151	104.538
CC	5	29	1	2	Trask-Pothole	Age3Plus	8	36.7797	5807.92	725.99
CC	1	29	1	2	Trask-Rock	Age0	0	0	0	0
CC	1	29	1	2	Trask-Rock	Age1	25	24.0523	5763.77	230.551
CC	1	29	1	2	Trask-Rock	Age2	15	21.9414	2365.05	157.67
CC	1	29	1	2	Trask-Rock	Age3Plus	14	40.4763	12683.3	905.953
CC	2	29	1	2	Trask-Rock	Age0	0	0	0	0
CC	2	29	1	2	Trask-Rock	Age1	26	22.7629	4482.47	172.403
CC	2	29	1	2	Trask-Rock	Age2	9	26.9665	2249.64	249.96
CC	2	29	1	2	Trask-Rock	Age3Plus	11	48.8996	23461.7	2132.88
CC	3	29	1	2	Trask-Rock	Age0	0	0	0	0
CC	3	29	1	2	Trask-Rock	Age1	25	20.4379	3819.86	152.794
CC	3	29	1	2	Trask-Rock	Age2	10	27.1049	2076.89	207.689
CC	3	29	1	2	Trask-Rock	Age3Plus	18	48.8058	25841.2	1435.62
CC	4	29	1	2	Trask-Rock	Age0	0	0	0	0
CC	4	29	1	2	Trask-Rock	Age1	25	22.0678	4080.09	163.204
CC	4	29	1	2	Trask-Rock	Age2	7	18.801	777.499	111.071
CC	4	29	1	2	Trask-Rock	Age3Plus	7	30.4797	5204.89	743.555
CC	5	29	1	2	Trask-Rock	Age0	0	0	0	0
CC	5	29	1	2	Trask-Rock	Age1	24	23.0871	5201.61	216.734
CC	5	29	1	2	Trask-Rock	Age2	10	26.212	2601.3	260.13
CC	5	29	1	2	Trask-Rock	Age3Plus	11	38.4434	13060	1187.27
CC	1	29	1	2	Trask-UM	Age0	0	0	0	0
CC	1	29	1	2	Trask-UM	Age1	55	17.3807	5577.41	101.408
CC	1	29	1	2	Trask-UM	Age2	17	16.2473	1077.39	63.376
CC	1	29	1	2	Trask-UM	Age3Plus	12	30.6469	7354.57	612.881
CC	2	29	1	2	Trask-UM	Age0	0	0	0	0
CC	2	29	1	2	Trask-UM	Age1	51	15.1522	3482.56	68.2854
CC	2	29	1	2	Trask-UM	Age2	26	16.2337	1707.52	65.6739
CC	2	29	1	2	Trask-UM	Age3Plus	18	26.4856	6267.5	348.194
CC	3	29	1	2	Trask-UM	Age0	0	0	0	0
CC	3	29	1	2	Trask-UM	Age1	63	16.1505	4781.81	75.9017
CC	3	29	1	2	Trask-UM	Age2	21	18.6071	2092.06	99.6218
CC	3	29	1	2	Trask-UM	Age3Plus	14	29.5552	7009.35	500.668
CC	4	29	1	2	Trask-UM	Age0	0	0	0	0
CC	4	29	1	2	Trask-UM	Age1	59	17.4177	5332.45	90.3805
CC	4	29	1	2	Trask-UM	Age2	29	16.1748	1950.05	67.2432
CC	4	29	1	2	Trask-UM	Age3Plus	15	28.043	7508.12	500.541
CC	5	29	1	2	Trask-UM	Age0	0	0	0	0
CC	5	29	1	2	Trask-UM	Age1	53	17.8848	5969.55	112.633
CC	5	29	1	2	Trask-UM	Age2	32	17.4446	3377.39	105.543
CC	5	29	1	2	Trask-UM	Age3Plus	18	26.92	7778.3	432.128
FH+CC	1	29	1	2	Trask-Pothole	Age0	0	0	0	0
FH+CC	1	29	1	2	Trask-Pothole	Age1	16	24.1126	3050.69	190.668
FH+CC	1	29	1	2	Trask-Pothole	Age2	4	23.928	766.16	191.54
FH+CC	1	29	1	2	Trask-Pothole	Age3Plus	10	49.388	29112	2911.2
FH+CC	2	29	1	2	Trask-Pothole	Age0	0	0	0	0
FH+CC	2	29	1	2	Trask-Pothole	Age1	10	23.9395	2551.27	255.127
FH+CC	2	29	1	2	Trask-Pothole	Age2	7	30.2309	2692.41	384.63
FH+CC	2	29	1	2	Trask-Pothole	Age3Plus	9	35.334	5055.76	561.751
FH+CC	3	29	1	2	Trask-Pothole	Age0	0	0	0	0
FH+CC	3	29	1	2	Trask-Pothole	Age1	15	24.0918	4129.28	275.285
FH+CC	3	29	1	2	Trask-Pothole	Age2	2	17.6218	110.842	55.421
FH+CC	3	29	1	2	Trask-Pothole	Age3Plus	8	38.5992	4919.29	614.912
FH+CC	4	29	1	2	Trask-Pothole	Age0	0	0	0	0
FH+CC	4	29	1	2	Trask-Pothole	Age1	18	22.6119	3192.46	177.359
FH+CC	4	29	1	2	Trask-Pothole	Age2	4	20.2699	836.551	209.138
FH+CC	4	29	1	2	Trask-Pothole	Age3Plus	5	48.3708	5375.2	1075.04
FH+CC	5	29	1	2	Trask-Pothole	Age0	0	0	0	0
FH+CC	5	29	1	2	Trask-Pothole	Age1	17	20.3473	2437.79	143.399
FH+CC	5	29	1	2	Trask-Pothole	Age2	4	19.7752	418.151	104.538
FH+CC	5	29	1	2	Trask-Pothole	Age3Plus	8	36.7797	5807.92	725.99
FH+CC	1	29	1	2	Trask-Rock	Age0	0	0	0	0
FH+CC	1	29	1	2	Trask-Rock	Age1	25	24.0523	5763.77	230.551
FH+CC	1	29	1	2	Trask-Rock	Age2	15	21.9414	2365.05	157.67
FH+CC	1	29	1	2	Trask-Rock	Age3Plus	14	40.4763	12683.3	905.953
FH+CC	2	29	1	2	Trask-Rock	Age0	0	0	0	0
FH+CC	2	29	1	2	Trask-Rock	Age1	26	22.7629	4482.47	172.403
FH+CC	2	29	1	2	Trask-Rock	Age2	9	26.9665	2249.64	249.96
FH+CC	2	29	1	2	Trask-Rock	Age3Plus	11	48.8996	23461.7	2132.88
FH+CC	3	29	1	2	Trask-Rock	Age0	0	0	0	0
FH+CC	3	29	1	2	Trask-Rock	Age1	25	20.4379	3819.86	152.794
FH+CC	3	29	1	2	Trask-Rock	Age2	10	27.1049	2076.89	207.689
FH+CC	3	29	1	2	Trask-Rock	Age3Plus	18	48.8058	25841.2	1435.62
FH+CC	4	29	1	2	Trask-Rock	Age0	0	0	0	0
FH+CC	4	29	1	2	Trask-Rock	Age1	25	22.0678	4080.09	163.204
FH+CC	4	29	1	2	Trask-Rock	Age2	7	18.801	777.499	111.071
FH+CC	4	29	1	2	Trask-Rock	Age3Plus	7	30.4797	5204.89	743.555
FH+CC	5	29	1	2	Trask-Rock	Age0	0	0	0	0
FH+CC	5	29	1	2	Trask-Rock	Age1	24	23.0871	5201.61	216.734
FH+CC	5	29	1	2	Trask-Rock	Age2	10	26.212	2601.3	260.13
FH+CC	5	29	1	2	Trask-Rock	Age3Plus	11	38.4434	13060	1187.27
FH+CC	1	29	1	2	Trask-UM	Age0	0	0	0	0
FH+CC	1	29	1	2	Trask-UM	Age1	55	17.3807	5577.41	101.408
FH+CC	1	29	1	2	Trask-UM	Age2	17	16.2473	1077.39	63.376
FH+CC	1	29	1	2	Trask-UM	Age3Plus	12	30.6469	7354.57	612.881
FH+CC	2	29	1	2	Trask-UM	Age0	0	0	0	0
FH+CC	2	29	1	2	Trask-UM	Age1	51	15.1522	3482.56	68.2854
FH+CC	2	29	1	2	Trask-UM	Age2	26	16.2337	1707.52	65.6739
FH+CC	2	29	1	2	Trask-UM	Age3Plus	18	26.4856	6267.5	348.194
FH+CC	3	29	1	2	Trask-UM	Age0	0	0	0	0
FH+CC	3	29	1	2	Trask-UM	Age1	63	16.1505	4781.81	75.9017
FH+CC	3	29	1	2	Trask-UM	Age2	21	18.6071	2092.06	99.6218
FH+CC	3	29	1	2	Trask-UM	Age3Plus	14	29.5552	7009.35	500.668
FH+CC	4	29	1	2	Trask-UM	Age0	0	0	0	0
FH+CC	4	29	1	2	Trask-UM	Age1	54	16.378	4201.21	77.8002
FH+CC	4	29	1	2	Trask-UM	Age2	21	14.2072	734.582	34.9801
FH+CC	4	29	1	2	Trask-UM	Age3Plus	14	39.1792	12985.2	927.517
FH+CC	5	29	1	2	Trask-UM	Age0	0	0	0	0
FH+CC	5	29	1	2	Trask-UM	Age1	59	17.4177	5332.45	90.3805
FH+CC	5	29	1	2	Trask-UM	Age2	29	16.1748	1950.05	67.2432
FH+CC	5	29	1	2	Trask-UM	Age3Plus	15	28.043	7508.12	500.541
baseline	1	4	2	2	Trask-Gus	Age0	0	0	0	0
baseline	1	4	2	2	Trask-Gus	Age1	28	11.8072	545.788	19.4924
baseline	1	4	2	2	Trask-Gus	Age2	15	21.0929	1650.71	110.047
baseline	1	4	2	2	Trask-Gus	Age3Plus	1	28.8664	278.863	278.863
baseline	2	4	2	2	Trask-Gus	Age0	0	0	0	0
baseline	2	4	2	2	Trask-Gus	Age1	27	12.0382	558.782	20.6956
baseline	2	4	2	2	Trask-Gus	Age2	8	20.2302	775.377	96.9221
baseline	2	4	2	2	Trask-Gus	Age3Plus	6	29.4326	1889.05	314.841
baseline	3	4	2	2	Trask-Gus	Age0	0	0	0	0
baseline	3	4	2	2	Trask-Gus	Age1	35	12.0284	720.173	20.5764
baseline	3	4	2	2	Trask-Gus	Age2	8	18.4745	591.593	73.9491
baseline	3	4	2	2	Trask-Gus	Age3Plus	7	31.3951	2616.02	373.718
baseline	4	4	2	2	Trask-Gus	Age0	0	0	0	0
baseline	4	4	2	2	Trask-Gus	Age1	12	11.5615	223.812	18.651
baseline	4	4	2	2	Trask-Gus	Age2	10	19.8094	908.362	90.8362
baseline	4	4	2	2	Trask-Gus	Age3Plus	4	31.0673	1513.88	378.471
baseline	5	4	2	2	Trask-Gus	Age0	0	0	0	0
baseline	5	4	2	2	Trask-Gus	Age1	37	12.0336	762.756	20.615
baseline	5	4	2	2	Trask-Gus	Age2	9	19.4178	771.021	85.669
baseline	5	4	2	2	Trask-Gus	Age3Plus	5	33.35	2364.84	472.968
FH	1	4	2	2	Trask-Gus	Age0	0	0	0	0
FH	1	4	2	2	Trask-Gus	Age1	20	11.9339	409.8	20.49
FH	1	4	2	2	Trask-Gus	Age2	10	19.1796	828.245	82.8245
FH	1	4	2	2	Trask-Gus	Age3Plus	10	31.0405	4073.9	407.39
FH	2	4	2	2	Trask-Gus	Age0	0	0	0	0
FH	2	4	2	2	Trask-Gus	Age1	32	11.8476	631.316	19.7286
FH	2	4	2	2	Trask-Gus	Age2	9	19.8293	820.731	91.1923
FH	2	4	2	2	Trask-Gus	Age3Plus	5	31.7557	2072.29	414.458
FH	3	4	2	2	Trask-Gus	Age0	0	0	0	0
FH	3	4	2	2	Trask-Gus	Age1	22	11.7661	425.81	19.355
FH	3	4	2	2	Trask-Gus	Age2	11	19.491	969.546	88.1406
FH	3	4	2	2	Trask-Gus	Age3Plus	6	32.7154	2716.93	452.821
FH	4	4	2	2	Trask-Gus	Age0	0	0	0	0
FH	4	4	2	2	Trask-Gus	Age1	16	11.8574	316.961	19.81
FH	4	4	2	2	Trask-Gus	Age2	13	20.4098	1291.1	99.3151
FH	4	4	2	2	Trask-Gus	Age3Plus	7	30.677	2705.74	386.534
FH	5	4	2	2	Trask-Gus	Age0	0	0	0	0
FH	5	4	2	2	Trask-Gus	Age1	31	11.8674	623.489	20.1126
FH	5	4	2	2	Trask-Gus	Age2	9	19.1454	751.18	83.4644
FH	5	4	2	2	Trask-Gus	Age3Plus	5	28.2608	1390.05	278.01
CC	1	4	2	2	Trask-Gus	Age0	0	0	0	0
CC	1	4	2	2	Trask-Gus	Age1	46	12.8479	1159.43	25.2049
CC	1	4	2	2	Trask-Gus	Age2	7	21.0985	768.825	109.832
CC	1	4	2	2	Trask-Gus	Age3Plus	2	35.1589	1019.67	509.834
CC	2	4	2	2	Trask-Gus	Age0	0	0	0	0
CC	2	4	2	2	Trask-Gus	Age1	28	12.6113	667.809	23.8503
CC	2	4	2	2	Trask-Gus	Age2	4	20.1114	380.037	95.0093
CC	2	4	2	2	Trask-Gus	Age3Plus	6	29.4918	2197.81	366.301
CC	3	4	2	2	Trask-Gus	Age0	0	0	0	0
CC	3	4	2	2	Trask-Gus	Age1	22	12.2239	477.495	21.7043
CC	3	4	2	2	Trask-Gus	Age2	11	20.6157	1150.38	104.58
CC	3	4	2	2	Trask-Gus	Age3Plus	2	28.5138	585.681	292.84
CC	4	4	2	2	Trask-Gus	Age0	0	0	0	0
CC	4	4	2	2	Trask-Gus	Age1	39	12.5713	921.867	23.6376
CC	4	4	2	2	Trask-Gus	Age2	4	20.585	407.319	101.83
CC	4	4	2	2	Trask-Gus	Age3Plus	4	37.14	2396.46	599.115
CC	5	4	2	2	Trask-Gus	Age0	0	0	0	0
CC	5	4	2	2	Trask-Gus	Age1	18	12.1784	385.776	21.432
CC	5	4	2	2	Trask-Gus	Age2	10	21.3637	1176.75	117.675
CC	5	4	2	2	Trask-Gus	Age3Plus	4	30.6981	1432.88	358.221
FH+CC	1	4	2	2	Trask-Gus	Age0	0	0	0	0
FH+CC	1	4	2	2	Trask-Gus	Age1	13	12.4741	299.62	23.0477
FH+CC	1	4	2	2	Trask-Gus	Age2	12	22.4525	1619.84	134.987
FH+CC	1	4	2	2	Trask-Gus	Age3Plus	5	31.1139	2034.5	406.9
FH+CC	2	4	2	2	Trask-Gus	Age0	0	0	0	0
FH+CC	2	4	2	2	Trask-Gus	Age1	16	12.7873	397.475	24.8422
FH+CC	2	4	2	2	Trask-Gus	Age2	11	22.2885	1428.74	129.885
FH+CC	2	4	2	2	Trask-Gus	Age3Plus	4	33.0659	1771.66	442.916
FH+CC	3	4	2	2	Trask-Gus	Age0	0	0	0	0
FH+CC	3	4	2	2	Trask-Gus	Age1	32	13.1902	871.809	27.244
FH+CC	3	4	2	2	Trask-Gus	Age2	7	20.6668	732.226	104.604
FH+CC	3	4	2	2	Trask-Gus	Age3Plus	6	31.7249	2456.94	409.49
FH+CC	4	4	2	2	Trask-Gus	Age0	0	0	0	0
FH+CC	4	4	2	2	Trask-Gus	Age1	45	13.0429	1193.97	26.5328
FH+CC	4	4	2	2	Trask-Gus	Age2	5	19.3114	421.779	84.3558
FH+CC	4	4	2	2	Trask-Gus	Age3Plus	6	30.8747	2188.45	364.741
FH+CC	5	4	2	2	Trask-Gus	Age0	0	0	0	0
FH+CC	5	4	2	2	Trask-Gus	Age1	44	12.7767	1097.55	24.9444
FH+CC	5	4	2	2	Trask-Gus	Age2	7	19.869	641.51	91.6443
FH+CC	5	4	2	2	Trask-Gus	Age3Plus	4	29.7594	1302.95	325.738
baseline	1	28	2	2	Trask-Pothole	Age0	0	0	0	0
baseline	1	28	2	2	Trask-Pothole	Age1	10	22.4124	1756.36	175.636
baseline	1	28	2	2	Trask-Pothole	Age2	2	13.2875	52.321	26.1605
baseline	1	28	2	2	Trask-Pothole	Age3Plus	9	52.4539	28117.9	3124.21
baseline	2	28	2	2	Trask-Pothole	Age0	0	0	0	0
baseline	2	28	2	2	Trask-Pothole	Age1	9	24.0037	2361.25	262.361
baseline	2	28	2	2	Trask-Pothole	Age2	5	32.6412	2366.04	473.207
baseline	2	28	2	2	Trask-Pothole	Age3Plus	5	29.2819	1633.53	326.707
baseline	3	28	2	2	Trask-Pothole	Age0	0	0	0	0
baseline	3	28	2	2	Trask-Pothole	Age1	9	22.9442	1649.74	183.305
baseline	3	28	2	2	Trask-Pothole	Age2	1	20.5953	85.8565	85.8565
baseline	3	28	2	2	Trask-Pothole	Age3Plus	3	37.4927	1847.06	615.686
baseline	4	28	2	2	Trask-Pothole	Age0	0	0	0	0
baseline	4	28	2	2	Trask-Pothole	Age1	11	19.5437	1365.41	124.128
baseline	4	28	2	2	Trask-Pothole	Age2	4	20.8735	815.819	203.955
baseline	4	28	2	2	Trask-Pothole	Age3Plus	4	50.8651	4733.92	1183.48
baseline	5	28	2	2	Trask-Pothole	Age0	0	0	0	0
baseline	5	28	2	2	Trask-Pothole	Age1	12	15.8514	878.336	73.1946
baseline	5	28	2	2	Trask-Pothole	Age2	2	12.6108	48.8147	24.4073
baseline	5	28	2	2	Trask-Pothole	Age3Plus	5	30.0091	2620.98	524.197
baseline	1	28	2	2	Trask-Rock	Age0	0	0	0	0
baseline	1	28	2	2	Trask-Rock	Age1	19	23.9756	4514.01	237.58
baseline	1	28	2	2	Trask-Rock	Age2	10	20.7812	1402.81	140.281
baseline	1	28	2	2	Trask-Rock	Age3Plus	10	44.6599	10710.3	1071.03
baseline	2	28	2	2	Trask-Rock	Age0	0	0	0	0
baseline	2	28	2	2	Trask-Rock	Age1	22	23.2816	3758.51	170.841
baseline	2	28	2	2	Trask-Rock	Age2	5	30.7217	1504.05	300.811
baseline	2	28	2	2	Trask-Rock	Age3Plus	10	46.761	19609	1960.9
baseline	3	28	2	2	Trask-Rock	Age0	0	0	0	0
baseline	3	28	2	2	Trask-Rock	Age1	16	14.6629	761.278	47.5799
baseline	3	28	2	2	Trask-Rock	Age2	6	27.8862	1367.31	227.886
baseline	3	28	2	2	Trask-Rock	Age3Plus	9	52.508	16347	1816.33
baseline	4	28	2	2	Trask-Rock	Age0	0	0	0	0
baseline	4	28	2	2	Trask-Rock	Age1	17	19.1097	1956.1	115.065
baseline	4	28	2	2	Trask-Rock	Age2	3	17.2852	179.647	59.8822
baseline	4	28	2	2	Trask-Rock	Age3Plus	3	17.2098	249.697	83.2324
baseline	5	28	2	2	Trask-Rock	Age0	0	0	0	0
baseline	5	28	2	2	Trask-Rock	Age1	16	25.6486	4430.29	276.893
baseline	5	28	2	2	Trask-Rock	Age2	9	24.8907	2042.52	226.947
baseline	5	28	2	2	Trask-Rock	Age3Plus	8	36.1093	9339.5	1167.44
baseline	1	28	2	2	Trask-UM	Age0	0	0	0	0
baseline	1	28	2	2	Trask-UM	Age1	42	15.8771	3411.98	81.2376
baseline	1	28	2	2	Trask-UM	Age2	10	13.0092	262.294	26.2294
baseline	1	28	2	2	Trask-UM	Age3Plus	10	27.1845	4945.75	494.575
baseline	2	28	2	2	Trask-UM	Age0	0	0	0	0
baseline	2	28	2	2	Trask-UM	Age1	37	13.3448	1515.9	40.9704
baseline	2	28	2	2	Trask-UM	Age2	19	13.6745	750.875	39.5197
baseline	2	28	2	2	Trask-UM	Age3Plus	12	26.9048	4906.27	408.856
baseline	3	28	2	2	Trask-UM	Age0	0	0	0	0
baseline	3	28	2	2	Trask-UM	Age1	37	13.8453	1548.51	41.8515
baseline	3	28	2	2	Trask-UM	Age2	12	15.7055	872.988	72.749
baseline	3	28	2	2	Trask-UM	Age3Plus	6	17.0238	446.265	74.3774
baseline	4	28	2	2	Trask-UM	Age0	0	0	0	0
baseline	4	28	2	2	Trask-UM	Age1	41	15.5444	2937.82	71.6541
baseline	4	28	2	2	Trask-UM	Age2	23	15.2141	1245.02	54.1311
baseline	4	28	2	2	Trask-UM	Age3Plus	7	26.4285	4293.47	613.353
baseline	5	28	2	2	Trask-UM	Age0	0	0	0	0
baseline	5	28	2	2	Trask-UM	Age1	40	16.0991	4054.59	101.365
baseline	5	28	2	2	Trask-UM	Age2	23	16.6511	2210.82	96.1228
baseline	5	28	2	2	Trask-UM	Age3Plus	13	27.2669	3767.71	289.824
FH	1	28	2	2	Trask-Pothole	Age0	0	0	0	0
FH	1	28	2	2	Trask-Pothole	Age1	10	22.4124	1756.36	175.636
FH	1	28	2	2	Trask-Pothole	Age2	2	13.2875	52.321	26.1605
FH	1	28	2	2	Trask-Pothole	Age3Plus	9	52.4539	28117.9	3124.21
FH	2	28	2	2	Trask-Pothole	Age0	0	0	0	0
FH	2	28	2	2	Trask-Pothole	Age1	9	24.0037	2361.25	262.361
FH	2	28	2	2	Trask-Pothole	Age2	5	32.6412	2366.04	473.207
FH	2	28	2	2	Trask-Pothole	Age3Plus	5	29.2819	1633.53	326.707
FH	3	28	2	2	Trask-Pothole	Age0	0	0	0	0
FH	3	28	2	2	Trask-Pothole	Age1	9	22.9442	1649.74	183.305
FH	3	28	2	2	Trask-Pothole	Age2	1	20.5953	85.8565	85.8565
FH	3	28	2	2	Trask-Pothole	Age3Plus	3	37.4927	1847.06	615.686
FH	4	28	2	2	Trask-Pothole	Age0	0	0	0	0
FH	4	28	2	2	Trask-Pothole	Age1	11	19.5437	1365.41	124.128
FH	4	28	2	2	Trask-Pothole	Age2	4	20.8735	815.819	203.955
FH	4	28	2	2	Trask-Pothole	Age3Plus	4	50.8651	4733.92	1183.48
FH	5	28	2	2	Trask-Pothole	Age0	0	0	0	0
FH	5	28	2	2	Trask-Pothole	Age1	12	15.8514	878.336	73.1946
FH	5	28	2	2	Trask-Pothole	Age2	2	12.6108	48.8147	24.4073
[truncated: 259,277+ more rows]

## Sheet:  Gus cell data
Cell data for Trask at Gus Creek
Developed by SFR from Brooke's input	8/17/12
Cell number	fracVelShel	DistCov(m)	fracSpawn	ReachEndCode
101	0	0	0	I
102	0.15	0.2	0.02	D
103	0.6	0.05	0.02	D
104	0	0	0	I
201	0	0	0	I
202	0.25	0.05	0.15	I
203	0.1	0.2	0	I
204	0.1	0.25	0	I
205	0	0	0	I
301	0	0	0	I
302	0.2	0.01	0	I
303	0.05	0.5	0.1	I
304	0.1	1	0	I
305	0	0	0	I
401	0	0	0	I
402	0.3	0.1	0	I
403	0.2	0.05	0	I
404	0.05	1	0	I
405	0	0	0	I
501	0	0	0	I
502	0.05	0.25	0	I
503	0.05	0.25	0.1	I
504	0.1	0.25	0	I
505	0	0	0	I
601	0	0	0	I
602	0.15	0.05	0	I
603	0.2	0.1	0.1	I
604	0.15	0.25	0.05	I
605	0	0	0	I
701	0	0	0	I
702	0.15	0.25	0.1	I
703	0.3	0.05	0.1	I
704	0	0	0	I
801	0	0	0	I
802	0.15	0.1	0	I
803	0.05	0.25	0.05	I
804	0.15	0.25	0.15	I
805	0	0	0	I
901	0	0	0	I
902	0.3	0.1	0	I
903	0.1	0.25	0	I
904	0.25	0.05	0	I
905	0	0	0	I
1001	0	0	0	I
1002	0.05	0.25	0	I
1003	0.03	0.3	0	I
1004	0.2	0.1	0.25	I
1005	0	0	0	I
1101	0	0	0	I
1102	0.15	0.25	0.03	I
1103	0.15	0.25	0.15	I
1104	0	0	0	I
1201	0	0	0	I
1202	0.03	0.5	0.15	I
1203	0	0	0	I
1204	0.03	0.25	0.1	I
1205	0	0	0	I
1301	0	0	0	I
1302	0.02	10	0	I
1303	0.02	0.1	0	I
1304	0	0	0	I
1401	0	0	0	I
1402	0.3	0.25	0	I
1403	0.2	0.25	0	I
1404	0	0	0	I
1501	0	0	0	I
1502	0.3	0.25	0.03	I
1503	0.6	0.05	0.05	I
1504	0.1	0.1	0.1	I
1505	0.1	0.5	0	I
1506	0	0	0	I
1601	0	0	0	I
1602	0.03	0.5	0	I
1603	0.05	1	0	I
1604	0	0	0	I
1701	0	0	0	I
1702	0.3	0.25	0.03	I
1703	0.15	0.25	0	I
1704	0	0	0	I
1801	0	0	0	I
1802	0.03	0.25	0.2	I
1803	0.15	0.1	0	I
1804	0	0	0	I
1901	0	0	0	I
1902	0.05	0.5	0.4	I
1903	0.02	1	0.2	I
1904	0	2	0	I
1905	0	0	0	I
2001	0	0	0	I
2002	0.2	0.1	0	I
2003	0.3	0.1	0	I
2004	0.03	0.1	0	I
2005	0.03	0	0	I
2006	0	0	0	I
2101	0	0	0	I
2102	0	0	0.03	I
2103	0	0	0.03	I
2104	0	0	0.03	I
2105	0	0	0	I
2201	0	0	0	I
2202	0.03	0.25	0	I
2203	0	1	0	I
2204	0.05	0.5	0	I
2205	0	0	0	I
2206	0	0	0	I
2301	0	0	0	I
2302	0	2	0	I
2303	0	2	0	I
2304	0	3	0	I
2305	0	3	0	I
2306	0	3	0	I
2307	0	0	0	I
2401	0	0	0	I
2402	0.2	0.25	0	I
2403	0.05	0.25	0	I
2404	0.08	0.25	0	I
2405	0.05	0.25	0	I
2406	0	1	0	I
2407	0	0	0	I
2501	0	0	0	I
2502	0	0	0.1	I
2503	0.03	0.5	0	I
2504	0.2	0.25	0.05	I
2505	0.3	0.25	0	I
2506	0	0	0	I
2601	0	0	0	I
2602	0.03	0.5	0.75	I
2603	0.25	0.2	0.05	I
2604	0.1	0.5	0	I
2605	0.15	1	0	I
2606	0	0	0	I
2701	0	0	0	I
2702	0.05	1	0	I
2703	0.25	0.25	0.5	I
2704	0.5	0.25	0	I
2705	0.3	0.5	0	I
2706	0	0	0	I
2801	0	0	0	I
2802	0.05	1	0	I
2803	0.5	0.25	0.05	I
2804	0.5	0.25	0	I
2805	0	0	0	I
2901	0	0	0	I
2902	0.1	0.5	0	I
2903	0.15	1.1	0	I
2904	0	2	0.2	I
2905	0.03	2	0.1	I
2906	0	0	0	I
3001	0	0	0	I
3002	0.2	0.5	0	I
3003	0.3	0.25	0.1	I
3004	0	2	0	I
3005	0	2	0	I
3006	0	0	0	I
3101	0	0	0	I
3102	0	3	0	I
3103	0	2	0	I
3104	0	2	0	I
3105	0	4	0	I
3106	0	0	0	I
3201	0	0	0	I
3202	0.1	0.5	0	I
3203	0.05	0.5	0	I
3204	0	0	0	I
3205	0	0	0	I
3301	0	0	0	I
3302	0.15	1.5	0	I
3303	0.03	2	0	I
3304	0.05	5	0	I
3305	0	0	0	I
3401	0	0	0	I
3402	0.03	3	0	I
3403	0.25	0.5	0.03	I
3404	0.25	0.25	0.2	I
3405	0	0	0	I
3501	0	0	0	I
3502	0.4	0.25	0	U
3503	0.15	0.25	0	U
3504	0	0	0	I

## Sheet: Gus hyd data
Hydraulic file for Trask River, Gus site.
Created for inSTREAM v. 5 from v. 4.2 depth-velocity output file		SFR 9/5/2012	Flow in m3/s
Flows:	0.01		0.02		0.03		0.04		0.05		0.06		0.07		0.08		0.09		0.1		0.11		0.12		0.13		0.14		0.15		0.16		0.17		0.18		0.19		0.2		0.21		0.22		0.23		0.24		0.25
CellNum	Depth@0.01	Vel@0.01	Depth@0.02	Vel@0.02	Depth@0.03	Vel@0.03	Depth@0.04	Vel@0.04	Depth@0.05	Vel@0.05	Depth@0.06	Vel@0.06	Depth@0.07	Vel@0.07	Depth@0.08	Vel@0.08	Depth@0.09	Vel@0.09	Depth@0.1	Vel@0.1	Depth@0.11	Vel@0.11	Depth@0.12	Vel@0.12	Depth@0.13	Vel@0.13	Depth@0.14	Vel@0.14	Depth@0.15	Vel@0.15	Depth@0.16	Vel@0.16	Depth@0.17	Vel@0.17	Depth@0.18	Vel@0.18	Depth@0.19	Vel@0.19	Depth@0.2	Vel@0.2	Depth@0.21	Vel@0.21	Depth@0.22	Vel@0.22	Depth@0.23	Vel@0.23	Depth@0.24	Vel@0.24	Depth@0.25
101	0	0	0	0	0	0	0	0	0	0	0	0	0	0	0	0	0	0	0	0	0	0	0	0	0	0	0	0	0	0	0	0	0	0	0	0	0	0	0	0	0	0	0	0	0	0	0	0	0
102	0	0	0	0	0	0	0.01	0.07	0.03	0.1	0.05	0.03	0.07	0.04	0.09	0.04	0.11	0.05	0.13	0.05	0.15	0.06	0.17	0.06	0.19	0.06	0.21	0.07	0.23	0.07	0.26	0.07	0.28	0.07	0.3	0.08	0.32	0.23	0.34	0.24	0.36	0.25	0.38	0.26	0.4	0.26	0.42	0.27	0.44
103	0.02	0.22	0.04	0.38	0.06	0.33	0.08	0.24	0.1	0.21	0.12	0.29	0.14	0.3	0.16	0.31	0.18	0.33	0.2	0.34	0.22	0.35	0.24	0.37	0.26	0.38	0.28	0.39	0.3	0.41	0.33	0.42	0.35	0.43	0.37	0.45	0.39	0.3	0.41	0.31	0.43	0.32	0.45	0.33	0.47	0.33	0.49	0.34	0.51
104	0	0	0	0	0	0	0	0	0	0	0	0	0	0	0	0	0	0	0	0	0	0	0	0	0	0	0	0	0	0	0	0	0	0	0	0	0	0	0	0	0	0	0	0	0	0	0	0	0
201	0	0	0	0	0	0	0	0	0	0	0	0	0	0	0	0	0	0	0	0	0	0	0	0	0	0	0	0	0	0	0	0	0	0	0	0	0	0	0	0	0	0	0	0	0	0	0	0	0
202	0.04	0.04	0.06	0.06	0.07	0.08	0.09	0.1	0.1	0.12	0.11	0.29	0.13	0.32	0.14	0.34	0.15	0.37	0.16	0.39	0.17	0.41	0.18	0.43	0.19	0.45	0.2	0.45	0.21	0.46	0.22	0.46	0.23	0.47	0.24	0.48	0.25	0.34	0.26	0.35	0.27	0.36	0.28	0.37	0.29	0.37	0.3	0.38	0.31
203	0.02	0.1	0.04	0.19	0.05	0.27	0.07	0.34	0.08	0.4	0.09	0.34	0.11	0.38	0.12	0.42	0.13	0.45	0.14	0.48	0.15	0.51	0.16	0.54	0.17	0.56	0.18	0.56	0.19	0.57	0.2	0.59	0.21	0.6	0.22	0.61	0.23	0.74	0.24	0.75	0.25	0.77	0.26	0.79	0.27	0.81	0.28	0.83	0.29
204	0	0	0	0	0	0	0	0	0	0	0	0	0	0	0	0	0	0	0	0	0	0	0	0	0	0.03	0.01	0.09	0.02	0.14	0.03	0.17	0.04	0.2	0.05	0.23	0.06	0.2	0.07	0.22	0.08	0.24	0.09	0.26	0.1	0.27	0.11	0.29	0.12
205	0	0	0	0	0	0	0	0	0	0	0	0	0	0	0	0	0	0	0	0	0	0	0	0	0	0	0	0	0	0	0	0	0	0	0	0	0	0	0	0	0	0	0	0	0	0	0	0	0
301	0	0	0	0	0	0	0	0	0	0	0	0	0	0	0	0	0	0	0	0	0	0	0	0	0	0	0	0	0	0	0	0	0	0	0	0	0	0	0	0	0	0	0	0	0	0	0	0	0
302	0.09	0.07	0.1	0.14	0.11	0.2	0.12	0.25	0.13	0.3	0.14	0.29	0.15	0.32	0.16	0.34	0.17	0.36	0.18	0.38	0.19	0.4	0.2	0.4	0.21	0.41	0.22	0.41	0.23	0.41	0.25	0.42	0.26	0.42	0.27	0.43	0.28	0.21	0.29	0.21	0.3	0.21	0.31	0.21	0.32	0.22	0.33	0.22	0.34
303	0	0	0.01	0.03	0.02	0.06	0.03	0.1	0.04	0.13	0.05	0.21	0.06	0.24	0.07	0.28	0.08	0.31	0.09	0.34	0.1	0.36	0.11	0.38	0.12	0.39	0.13	0.4	0.14	0.42	0.16	0.43	0.17	0.44	0.18	0.45	0.19	0.7	0.2	0.72	0.21	0.73	0.22	0.75	0.23	0.77	0.24	0.79	0.25
304	0	0	0	0	0	0	0	0	0	0	0	0	0	0	0	0	0	0	0	0	0	0	0	0.03	0.01	0.09	0.02	0.13	0.03	0.16	0.05	0.19	0.06	0.21	0.07	0.23	0.08	0.01	0.09	0.01	0.1	0.01	0.11	0.01	0.12	0.01	0.13	0.01	0.14
305	0	0	0	0	0	0	0	0	0	0	0	0	0	0	0	0	0	0	0	0	0	0	0	0	0	0	0	0	0	0	0	0	0	0	0	0	0	0	0	0	0	0	0	0	0	0	0	0	0
401	0	0	0	0	0	0	0	0	0	0	0	0	0	0	0	0	0	0	0	0	0	0	0	0	0	0	0	0	0	0	0	0	0	0	0	0	0	0	0	0	0	0	0	0	0	0	0	0	0
402	0.02	0.25	0.05	0.29	0.08	0.32	0.11	0.35	0.14	0.37	0.16	0.32	0.19	0.33	0.21	0.34	0.23	0.36	0.26	0.36	0.28	0.37	0.3	0.38	0.32	0.38	0.34	0.38	0.36	0.38	0.38	0.39	0.4	0.39	0.42	0.39	0.44	0.38	0.46	0.37	0.48	0.37	0.5	0.37	0.51	0.36	0.53	0.36	0.55
403	0.05	0.08	0.08	0.06	0.11	0.06	0.14	0.07	0.17	0.07	0.19	0.12	0.22	0.13	0.24	0.13	0.26	0.13	0.29	0.13	0.31	0.14	0.33	0.14	0.35	0.14	0.37	0.14	0.39	0.14	0.41	0.14	0.43	0.14	0.45	0.14	0.47	0.03	0.49	0.03	0.51	0.03	0.53	0.03	0.54	0.03	0.56	0.03	0.58
404	0	0	0	0	0	0	0	0	0	0	0	0	0	0	0	0	0	0	0	0	0	0	0	0	0.02	0.02	0.04	0.03	0.06	0.04	0.08	0.05	0.1	0.05	0.12	0.06	0.14	0.33	0.16	0.35	0.18	0.36	0.2	0.37	0.21	0.38	0.23	0.39	0.25
405	0	0	0	0	0	0	0	0	0	0	0	0	0	0	0	0	0	0	0	0	0	0	0	0	0	0	0	0	0	0	0	0	0	0	0	0	0	0	0	0	0	0	0	0	0	0	0	0	0
501	0	0	0	0	0	0	0	0	0	0	0	0	0	0	0	0	0	0	0	0	0	0	0	0	0	0	0	0	0	0	0	0	0	0	0	0	0	0	0	0	0	0	0	0	0	0	0	0	0
502	0.02	0.02	0.02	0.04	0.02	0.06	0.03	0.09	0.03	0.12	0.04	0.1	0.04	0.12	0.05	0.15	0.06	0.17	0.06	0.19	0.07	0.21	0.08	0.22	0.09	0.24	0.09	0.26	0.1	0.28	0.11	0.29	0.12	0.31	0.13	0.32	0.14	0.39	0.15	0.4	0.16	0.41	0.17	0.42	0.18	0.43	0.19	0.44	0.2
503	0.15	0.06	0.15	0.13	0.15	0.2	0.16	0.26	0.16	0.32	0.17	0.26	0.17	0.3	0.18	0.33	0.19	0.35	0.19	0.38	0.2	0.4	0.21	0.42	0.22	0.44	0.22	0.46	0.23	0.47	0.24	0.48	0.25	0.49	0.26	0.5	0.27	0.6	0.28	0.61	0.29	0.61	0.3	0.62	0.31	0.63	0.32	0.63	0.33
504	0.15	0	0.15	0.01	0.15	0.01	0.16	0.02	0.16	0.02	0.17	0.26	0.17	0.3	0.18	0.33	0.19	0.35	0.19	0.38	0.2	0.4	0.21	0.42	0.22	0.44	0.22	0.46	0.23	0.47	0.24	0.48	0.25	0.49	0.26	0.5	0.27	0.29	0.28	0.29	0.29	0.3	0.3	0.3	0.31	0.3	0.32	0.3	0.33
505	0	0	0	0	0	0	0	0	0	0	0	0	0	0	0	0	0	0	0	0	0	0	0	0	0	0	0	0	0	0	0	0	0	0	0	0	0	0	0	0	0	0	0	0	0	0	0	0	0
601	0	0	0	0	0	0	0	0	0	0	0	0	0	0	0	0	0	0	0	0	0	0	0	0	0	0	0	0	0	0	0	0	0	0	0	0	0	0	0	0	0	0	0	0	0	0	0	0	0
602	0.02	0.02	0.04	0.04	0.06	0.06	0.07	0.09	0.09	0.11	0.11	0.1	0.12	0.11	0.14	0.12	0.15	0.14	0.17	0.15	0.18	0.16	0.19	0.17	0.21	0.18	0.22	0.19	0.24	0.19	0.25	0.2	0.26	0.21	0.28	0.22	0.29	0.19	0.31	0.19	0.32	0.2	0.33	0.2	0.35	0.21	0.36	0.21	0.37
603	0.12	0.05	0.14	0.09	0.16	0.13	0.17	0.16	0.19	0.18	0.21	0.15	0.22	0.17	0.24	0.18	0.25	0.19	0.27	0.2	0.28	0.21	0.29	0.22	0.31	0.23	0.32	0.24	0.34	0.24	0.35	0.25	0.36	0.26	0.38	0.27	0.39	0.22	0.41	0.22	0.42	0.23	0.43	0.23	0.45	0.24	0.46	0.24	0.47
604	0.02	0.01	0.04	0.02	0.06	0.02	0.07	0.03	0.09	0.04	0.11	0.17	0.12	0.19	0.14	0.21	0.15	0.23	0.17	0.25	0.18	0.27	0.19	0.29	0.21	0.3	0.22	0.32	0.24	0.33	0.25	0.34	0.26	0.36	0.28	0.37	0.29	0.53	0.31	0.55	0.32	0.57	0.33	0.58	0.35	0.59	0.36	0.61	0.37
605	0	0	0	0	0	0	0	0	0	0	0	0	0	0	0	0	0	0	0	0	0	0	0	0	0	0	0	0	0	0	0	0	0	0	0	0	0	0	0	0	0	0	0	0	0	0	0	0	0
701	0	0	0	0	0	0	0	0	0	0	0	0	0	0	0	0	0	0	0	0	0	0	0	0	0	0	0	0	0	0	0	0	0	0	0	0	0	0	0	0	0	0	0	0	0	0	0	0	0
702	0.04	0.16	0.05	0.05	0.06	0.08	0.07	0.11	0.08	0.14	0.08	0.17	0.1	0.2	0.11	0.22	0.12	0.24	0.13	0.26	0.14	0.28	0.15	0.3	0.17	0.32	0.18	0.33	0.19	0.35	0.21	0.36	0.22	0.38	0.24	0.39	0.25	0.23	0.27	0.23	0.28	0.24	0.3	0.25	0.31	0.25	0.33	0.26	0.35
703	0.02	0.1	0.03	0.03	0.04	0.06	0.05	0.09	0.06	0.12	0.06	0.14	0.08	0.17	0.09	0.19	0.1	0.21	0.11	0.23	0.12	0.25	0.13	0.27	0.15	0.29	0.16	0.31	0.17	0.32	0.19	0.34	0.2	0.36	0.22	0.37	0.23	0.56	0.25	0.58	0.26	0.6	0.28	0.62	0.29	0.64	0.31	0.65	0.33
704	0	0	0	0	0	0	0	0	0	0	0	0	0	0	0	0	0	0	0	0	0	0	0	0	0	0	0	0	0	0	0	0	0	0	0	0	0	0	0	0	0	0	0	0	0	0	0	0	0
801	0	0	0	0	0	0	0	0	0	0	0	0	0	0	0	0	0	0	0	0	0	0	0	0	0	0	0	0	0	0	0	0	0	0	0	0	0	0	0	0	0	0	0	0	0	0	0	0	0
802	0.02	0.02	0.03	0.02	0.04	0.02	0.05	0.03	0.06	0.03	0.06	0.05	0.07	0.06	0.08	0.06	0.09	0.07	0.09	0.08	0.1	0.08	0.11	0.09	0.12	0.09	0.12	0.1	0.13	0.1	0.14	0.11	0.14	0.11	0.15	0.11	0.16	0.12	0.16	0.13	0.17	0.13	0.18	0.14	0.18	0.14	0.19	0.15	0.2
803	0.02	0.02	0.03	0.02	0.04	0.02	0.05	0.03	0.06	0.03	0.06	0.05	0.07	0.06	0.08	0.06	0.09	0.07	0.09	0.08	0.1	0.08	0.11	0.09	0.12	0.09	0.12	0.1	0.13	0.1	0.14	0.11	0.14	0.11	0.15	0.11	0.16	0.12	0.16	0.13	0.17	0.13	0.18	0.14	0.18	0.14	0.19	0.15	0.2
804	0	0.01	0.01	0.08	0.02	0.12	0.03	0.16	0.04	0.19	0.04	0.17	0.05	0.2	0.06	0.23	0.07	0.25	0.07	0.27	0.08	0.3	0.09	0.32	0.1	0.34	0.1	0.36	0.11	0.38	0.12	0.41	0.12	0.43	0.13	0.45	0.14	0.46	0.14	0.48	0.15	0.5	0.16	0.51	0.16	0.53	0.17	0.55	0.18
805	0	0	0	0	0	0	0	0	0	0	0	0	0	0	0	0	0	0	0	0	0	0	0	0	0	0	0	0	0	0	0	0	0	0	0	0	0	0	0	0	0	0	0	0	0	0	0	0	0
901	0	0	0	0	0	0	0	0	0	0	0	0	0	0	0	0	0	0	0	0	0	0	0	0	0	0	0	0	0	0	0	0	0	0	0	0	0	0	0	0	0	0	0	0	0	0	0	0	0
902	0	0	0	0	0	0	0	0	0	0	0	0	0.02	0.01	0.04	0.01	0.06	0.01	0.08	0.01	0.1	0.01	0.11	0.02	0.13	0.02	0.15	0.02	0.16	0.02	0.18	0.02	0.19	0.02	0.21	0.02	0.22	0.01	0.24	0.01	0.25	0.01	0.27	0.01	0.28	0.01	0.29	0.01	0.31
903	0.04	0.08	0.07	0.12	0.1	0.15	0.12	0.18	0.14	0.2	0.16	0.22	0.18	0.24	0.2	0.26	0.22	0.28	0.24	0.29	0.26	0.31	0.27	0.33	0.29	0.34	0.31	0.36	0.32	0.38	0.34	0.39	0.35	0.41	0.37	0.42	0.38	0.36	0.4	0.37	0.41	0.38	0.43	0.4	0.44	0.41	0.45	0.42	0.47
904	0.04	0.08	0.07	0.12	0.1	0.15	0.12	0.18	0.14	0.2	0.16	0.22	0.18	0.24	0.2	0.26	0.22	0.28	0.24	0.29	0.26	0.31	0.27	0.33	0.29	0.34	0.31	0.36	0.32	0.38	0.34	0.39	0.35	0.41	0.37	0.42	0.38	0.64	0.4	0.67	0.41	0.69	0.43	0.71	0.44	0.73	0.45	0.75	0.47
905	0	0	0	0	0	0	0	0	0	0	0	0	0	0	0	0	0	0	0	0	0	0	0	0	0	0	0	0	0	0	0	0	0	0	0	0	0	0	0	0	0	0	0	0	0	0	0	0	0
1001	0	0	0	0	0	0	0	0	0	0	0	0	0	0	0	0	0	0	0	0	0	0	0	0	0	0	0	0	0	0	0	0	0	0	0	0	0	0	0	0	0	0	0	0	0	0	0	0	0
1002	0.06	0.02	0.11	0.03	0.15	0.06	0.2	0.09	0.24	0.13	0.28	0.16	0.33	0.2	0.37	0.25	0.41	0.27	0.45	0.19	0.49	0.18	0.53	0.16	0.57	0.15	0.61	0.14	0.65	0.14	0.69	0.15	0.73	0.15	0.77	0.16	0.81	0.31	0.85	0.33	0.89	0.35	0.92	0.37	0.96	0.39	1	0.42	1.04
1003	0	0	0	0	0	0	0	0	0	0	0	0	0	0	0	0	0	0.02	0.04	0.15	0.08	0.2	0.12	0.22	0.16	0.24	0.2	0.25	0.24	0.27	0.28	0.29	0.32	0.32	0.36	0.34	0.4	0.39	0.44	0.43	0.48	0.47	0.51	0.51	0.55	0.56	0.59	0.6	0.63
1004	0	0	0	0	0	0	0	0	0	0	0	0	0	0	0	0	0	0	0	0	0	0	0.02	0.12	0.06	0.2	0.1	0.26	0.14	0.31	0.18	0.35	0.22	0.4	0.26	0.45	0.3	0.24	0.34	0.27	0.38	0.3	0.41	0.33	0.45	0.37	0.49	0.4	0.53
1005	0	0	0	0	0	0	0	0	0	0	0	0	0	0	0	0	0	0	0	0	0	0	0	0	0	0	0	0	0	0	0	0	0	0	0	0	0	0	0	0	0	0	0	0	0	0	0	0	0
1101	0	0	0	0	0	0	0	0	0	0	0	0	0	0	0	0	0	0	0	0	0	0	0	0	0	0	0	0	0	0	0	0	0	0	0	0	0	0	0	0	0	0	0	0	0	0	0	0	0
1102	0.05	0.01	0.1	0.01	0.15	0.01	0.2	0.02	0.25	0.02	0.29	0.01	0.34	0.01	0.39	0.01	0.43	0.01	0.48	0.01	0.52	0.02	0.57	0.02	0.61	0.02	0.65	0.02	0.7	0.02	0.74	0.02	0.79	0.03	0.83	0.03	0.87	0.4	0.92	0.42	0.96	0.45	1	0.47	1.04	0.5	1.09	0.52	1.13
1103	0	0	0.05	0.02	0.1	0.04	0.15	0.05	0.2	0.06	0.24	0.1	0.29	0.12	0.34	0.14	0.38	0.16	0.43	0.18	0.47	0.21	0.52	0.23	0.56	0.25	0.6	0.27	0.65	0.3	0.69	0.32	0.74	0.34	0.78	0.37	0.82	0.02	0.87	0.02	0.91	0.03	0.95	0.03	0.99	0.03	1.04	0.03	1.08
1104	0	0	0	0	0	0	0	0	0	0	0	0	0	0	0	0	0	0	0	0	0	0	0	0	0	0	0	0	0	0	0	0	0	0	0	0	0	0	0	0	0	0	0	0	0	0	0	0	0
1201	0	0	0	0	0	0	0	0	0	0	0	0	0	0	0	0	0	0	0	0	0	0	0	0	0	0	0	0	0	0	0	0	0	0	0	0	0	0	0	0	0	0	0	0	0	0	0	0	0
1202	0.06	0.02	0.1	0.02	0.13	0.03	0.16	0.03	0.19	0.04	0.21	0.23	0.24	0.25	0.26	0.28	0.28	0.3	0.3	0.32	0.32	0.35	0.34	0.37	0.36	0.39	0.37	0.41	0.39	0.43	0.41	0.45	0.42	0.48	0.44	0.5	0.46	0.38	0.47	0.39	0.49	0.41	0.5	0.42	0.52	0.44	0.53	0.45	0.55
1203	0.01	0.03	0.05	0.06	0.08	0.08	0.11	0.1	0.14	0.12	0.16	0.09	0.19	0.1	0.21	0.11	0.23	0.12	0.25	0.13	0.27	0.14	0.29	0.15	0.31	0.16	0.32	0.17	0.34	0.18	0.36	0.19	0.37	0.2	0.39	0.21	0.41	0.41	0.42	0.42	0.44	0.44	0.45	0.46	0.47	0.47	0.48	0.49	0.5
1204	0.06	0.08	0.1	0.09	0.13	0.11	0.16	0.13	0.19	0.14	0.21	0.11	0.24	0.12	0.26	0.13	0.28	0.14	0.3	0.15	0.32	0.16	0.34	0.17	0.36	0.18	0.37	0.19	0.39	0.2	0.41	0.21	0.42	0.22	0.44	0.23	0.46	0.03	0.47	0.03	0.49	0.03	0.5	0.04	0.52	0.04	0.53	0.04	0.55
1205	0	0	0	0	0	0	0	0	0	0	0	0	0	0	0	0	0	0	0	0	0	0	0	0	0	0	0	0	0	0	0	0	0	0	0	0	0	0	0	0	0	0	0	0	0	0	0	0	0
1301	0	0	0	0	0	0	0	0	0	0	0	0	0	0	0	0	0	0	0	0	0	0	0	0	0	0	0	0	0	0	0	0	0	0	0	0	0	0	0	0	0	0	0	0	0	0	0	0	0
1302	0.03	0.04	0.05	0.05	0.07	0.06	0.08	0.07	0.1	0.08	0.12	0.07	0.14	0.08	0.15	0.09	0.17	0.1	0.19	0.16	0.21	0.17	0.23	0.17	0.25	0.18	0.27	0.19	0.29	0.19	0.31	0.2	0.33	0.2	0.34	0.21	0.36	0.21	0.38	0.22	0.4	0.22	0.42	0.23	0.44	0.23	0.46	0.24	0.48
1303	0	0	0	0	0	0	0	0	0	0	0	0	0	0	0	0	0	0	0	0	0	0	0	0	0	0	0	0	0	0	0	0	0	0	0	0	0	0	0	0	0	0	0	0	0	0	0	0	0
1304	0	0	0	0	0	0	0	0	0	0	0	0	0	0	0	0	0	0	0	0	0	0	0	0	0	0	0	0	0	0	0	0	0	0	0	0	0	0	0	0	0	0	0	0	0	0	0	0	0
1401	0	0	0	0	0	0	0	0	0	0	0	0	0	0	0	0	0	0	0	0	0	0	0	0	0	0	0	0	0	0	0	0	0	0	0	0	0	0	0	0	0	0	0	0	0	0	0	0	0
1402	0.35	0.03	0.36	0.07	0.37	0.11	0.38	0.14	0.39	0.17	0.4	0.2	0.41	0.23	0.43	0.25	0.44	0.26	0.46	0.28	0.47	0.29	0.49	0.3	0.51	0.3	0.52	0.31	0.54	0.31	0.56	0.31	0.58	0.31	0.6	0.31	0.62	0.31	0.65	0.31	0.67	0.3	0.69	0.3	0.71	0.29	0.74	0.29	0.76
1403	0	0	0	0	0	0	0	0	0	0	0	0	0	0	0	0	0	0	0	0	0	0	0	0	0	0	0	0	0	0	0	0	0	0	0	0	0	0	0	0	0	0	0	0	0	0	0	0	0
1404	0	0	0	0	0	0	0	0	0	0	0	0	0	0	0	0	0	0	0	0	0	0	0	0	0	0	0	0	0	0	0	0	0	0	0	0	0	0	0	0	0	0	0	0	0	0	0	0	0
1501	0	0	0	0	0	0	0	0	0	0	0	0	0	0	0	0	0	0	0	0	0	0	0	0	0	0	0	0	0	0	0	0	0	0	0	0	0	0	0	0	0	0	0	0	0	0	0	0	0
1502	0.85	0.02	0.87	0.04	0.89	0.07	0.9	0.1	0.92	0.12	0.94	0.24	0.95	0.28	0.97	0.32	0.99	0.36	1.01	0.4	1.02	0.44	1.04	0.47	1.06	0.51	1.08	0.54	1.1	0.57	1.12	0.61	1.13	0.64	1.15	0.67	1.17	0.5	1.19	0.52	1.21	0.54	1.23	0.56	1.25	0.58	1.26	0.6	1.28
1503	0.63	0.02	0.65	0.04	0.67	0.06	0.68	0.08	0.7	0.1	0.72	0.01	0.73	0.01	0.75	0.01	0.77	0.01	0.79	0.01	0.8	0.01	0.82	0.01	0.84	0.01	0.86	0.01	0.88	0.01	0.9	0.02	0.91	0.02	0.93	0.02	0.95	0.19	0.97	0.2	0.99	0.2	1.01	0.21	1.03	0.22	1.04	0.23	1.06
1504	0.41	0	0.43	0.01	0.45	0.01	0.46	0.02	0.48	0.03	0.5	0.15	0.51	0.18	0.53	0.21	0.55	0.23	0.57	0.26	0.58	0.29	0.6	0.31	0.62	0.34	0.64	0.36	0.66	0.39	0.68	0.41	0.69	0.43	0.71	0.46	0.73	0.31	0.75	0.33	0.77	0.34	0.79	0.36	0.81	0.37	0.82	0.38	0.84
1505	0.45	0	0.47	0.01	0.49	0.02	0.5	0.02	0.52	0.03	0.54	0.06	0.55	0.08	0.57	0.09	0.59	0.1	0.61	0.11	0.62	0.12	0.64	0.13	0.66	0.14	0.68	0.15	0.7	0.16	0.72	0.17	0.73	0.18	0.75	0.19	0.77	0.48	0.79	0.5	0.81	0.52	0.83	0.54	0.85	0.56	0.86	0.58	0.88
1506	0	0	0	0	0	0	0	0	0	0	0	0	0	0	0	0	0	0	0	0	0	0	0	0	0	0	0	0	0	0	0	0	0	0	0	0	0	0	0	0	0	0	0	0	0	0	0	0	0
1601	0	0	0	0	0	0	0	0	0	0	0	0	0	0	0	0	0	0	0	0	0	0	0	0	0	0	0	0	0	0	0	0	0	0	0	0	0	0	0	0	0	0	0	0	0	0	0	0	0
1602	0	0	0	0	0	0	0	0	0	0	0	0	0	0	0	0	0	0	0	0	0	0	0.05	0.03	0.12	0.05	0.19	0.07	0.26	0.09	0.34	0.11	0.42	0.14	0.5	0.16	0.59	0.11	0.68	0.13	0.77	0.15	0.87	0.18	0.97	0.2	1.07	0.23	1.18
1603	0.01	0	0.02	0.01	0.04	0.02	0.07	0.02	0.1	0.03	0.14	0.01	0.18	0.01	0.23	0.01	0.28	0.08	0.34	0.09	0.4	0.1	0.46	0.09	0.53	0.08	0.6	0.09	0.67	0.1	0.75	0.11	0.83	0.12	0.91	0.14	1	0.22	1.09	0.25	1.18	0.28	1.28	0.32	1.38	0.35	1.48	0.39	1.59
1604	0	0	0	0	0	0	0	0	0	0	0	0	0	0	0	0	0	0	0	0	0	0	0	0	0	0	0	0	0	0	0	0	0	0	0	0	0	0	0	0	0	0	0	0	0	0	0	0	0
1701	0	0	0	0	0	0	0	0	0	0	0	0	0	0	0	0	0	0	0	0	0	0	0	0	0	0	0	0	0	0	0	0	0	0	0	0	0	0	0	0	0	0	0	0	0	0	0	0	0
1702	0.18	0.04	0.2	0.08	0.22	0.1	0.25	0.12	0.27	0.14	0.29	0.29	0.31	0.32	0.33	0.35	0.35	0.37	0.37	0.39	0.39	0.41	0.41	0.43	0.44	0.45	0.46	0.47	0.48	0.49	0.5	0.5	0.52	0.52	0.54	0.53	0.56	0.5	0.58	0.52	0.6	0.53	0.62	0.54	0.64	0.55	0.66	0.56	0.67
1703	0.03	0.05	0.05	0.13	0.07	0.21	0.1	0.29	0.12	0.35	0.14	0.28	0.16	0.32	0.18	0.36	0.2	0.4	0.22	0.43	0.24	0.47	0.26	0.5	0.29	0.53	0.31	0.56	0.33	0.59	0.35	0.62	0.37	0.64	0.39	0.67	0.41	0.73	0.43	0.76	0.45	0.78	0.47	0.81	0.49	0.83	0.51	0.85	0.52
1704	0	0	0	0	0	0	0	0	0	0	0	0	0	0	0	0	0	0	0	0	0	0	0	0	0	0	0	0	0	0	0	0	0	0	0	0	0	0	0	0	0	0	0	0	0	0	0	0	0
1801	0	0	0	0	0	0	0	0	0	0	0	0	0	0	0	0	0	0	0	0	0	0	0	0	0	0	0	0	0	0	0	0	0	0	0	0	0	0	0	0	0	0	0	0	0	0	0	0	0
1802	0.31	0.01	0.33	0.02	0.35	0.03	0.37	0.04	0.39	0.05	0.41	0.29	0.44	0.33	0.46	0.38	0.48	0.42	0.51	0.46	0.53	0.5	0.56	0.54	0.59	0.57	0.61	0.6	0.64	0.63	0.67	0.66	0.7	0.69	0.73	0.71	0.75	0.41	0.78	0.42	0.81	0.44	0.84	0.45	0.87	0.46	0.9	0.47	0.93
1803	0.11	0.03	0.13	0.08	0.15	0.13	0.17	0.19	0.19	0.25	0.21	0.08	0.24	0.1	0.26	0.12	0.28	0.14	0.31	0.15	0.33	0.17	0.36	0.18	0.39	0.2	0.41	0.21	0.44	0.22	0.47	0.24	0.5	0.25	0.53	0.26	0.55	0.61	0.58	0.63	0.61	0.65	0.64	0.67	0.67	0.69	0.7	0.71	0.73
1804	0	0	0	0	0	0	0	0	0	0	0	0	0	0	0	0	0	0	0	0	0	0	0	0	0	0	0	0	0	0	0	0	0	0	0	0	0	0	0	0	0	0	0	0	0	0	0	0	0
1901	0	0	0	0	0	0	0	0	0	0	0	0	0	0	0	0	0	0	0	0	0	0	0	0	0	0	0	0	0	0	0	0	0	0	0	0	0	0	0	0	0	0	0	0	0	0	0	0	0
1902	0	0	0	0	0	0	0	0	0	0	0	0	0	0	0	0	0	0	0	0	0	0	0	0	0	0	0.03	0.04	0.06	0.06	0.09	0.08	0.13	0.1	0.16	0.12	0.19	0.02	0.23	0.02	0.26	0.03	0.3	0.03	0.33	0.03	0.37	0.03	0.41
1903	0.03	0.02	0.04	0.28	0.06	0.02	0.07	0.03	0.09	0.05	0.11	0.06	0.14	0.08	0.16	0.09	0.18	0.11	0.21	0.13	0.24	0.14	0.26	0.16	0.29	0.18	0.32	0.19	0.35	0.2	0.38	0.21	0.42	0.22	0.45	0.24	0.48	0.44	0.52	0.47	0.55	0.5	0.59	0.53	0.62	0.56	0.66	0.59	0.7
1904	0.03	0.02	0.04	0.28	0.06	0.02	0.07	0.03	0.09	0.05	0.11	0.06	0.14	0.08	0.16	0.09	0.18	0.11	0.21	0.13	0.24	0.14	0.26	0.16	0.29	0.18	0.32	0.19	0.35	0.2	0.38	0.21	0.42	0.22	0.45	0.24	0.48	0	0.52	0	0.55	0.01	0.59	0.01	0.62	0.01	0.66	0.01	0.7
1905	0	0	0	0	0	0	0	0	0	0	0	0	0	0	0	0	0	0	0	0	0	0	0	0	0	0	0	0	0	0	0	0	0	0	0	0	0	0	0	0	0	0	0	0	0	0	0	0	0
2001	0	0	0	0	0	0	0	0	0	0	0	0	0	0	0	0	0	0	0	0	0	0	0	0	0	0	0	0	0	0	0	0	0	0	0	0	0	0	0	0	0	0	0	0	0	0	0	0	0
2002	0.26	0.01	0.27	0.04	0.28	0.07	0.29	0.1	0.31	0.13	0.33	0.02	0.34	0.02	0.37	0.02	0.39	0.03	0.41	0.03	0.44	0.03	0.47	0.04	0.5	0.04	0.53	0.04	0.57	0.04	0.6	0.05	0.64	0.05	0.68	0.05	0.72	0.23	0.76	0.24	0.81	0.24	0.85	0.25	0.9	0.25	0.94	0.26	0.99
2003	0.36	0.02	0.37	0.04	0.38	0.08	0.39	0.12	0.41	0.16	0.43	0.22	0.44	0.27	0.47	0.31	0.49	0.36	0.51	0.4	0.54	0.43	0.57	0.47	0.6	0.5	0.63	0.53	0.67	0.56	0.7	0.58	0.74	0.6	0.78	0.62	0.82	0.58	0.86	0.6	0.91	0.61	0.95	0.62	1	0.63	1.04	0.64	1.09
2004	0.36	0.01	0.37	0.04	0.38	0.06	0.39	0.1	0.41	0.13	0.43	0.17	0.44	0.21	0.47	0.24	0.49	0.27	0.51	0.31	0.54	0.33	0.57	0.36	0.6	0.38	0.63	0.41	0.67	0.43	0.7	0.45	0.74	0.46	0.78	0.48	0.82	0.5	0.86	0.51	0.91	0.52	0.95	0.53	1	0.54	1.04	0.55	1.09
2005	0	0	0	0	0	0	0	0	0	0	0	0	0	0	0	0	0	0	0	0	0	0	0	0	0	0	0	0	0	0	0	0	0	0	0	0	0	0	0	0	0	0	0	0	0	0	0	0	0
2006	0	0	0	0	0	0	0	0	0	0	0	0	0	0	0	0	0	0	0	0	0	0	0	0	0	0	0	0	0	0	0	0	0	0	0	0	0	0	0	0	0	0	0	0	0	0	0	0	0
2101	0	0	0	0	0	0	0	0	0	0	0	0	0	0	0	0	0	0	0	0	0	0	0	0	0	0	0	0	0	0	0	0	0	0	0	0	0	0	0	0	0	0	0	0	0	0	0	0	0
2102	0.04	0.02	0.05	0.05	0.06	0.09	0.07	0.14	0.08	0.18	0.09	0.26	0.1	0.3	0.12	0.34	0.13	0.38	0.14	0.41	0.16	0.44	0.18	0.47	0.19	0.49	0.21	0.52	0.23	0.54	0.25	0.56	0.27	0.58	0.29	0.6	0.31	0.64	0.33	0.66	0.36	0.67	0.38	0.69	0.4	0.7	0.42	0.72	0.45
2103	0.04	0.02	0.05	0.05	0.06	0.09	0.07	0.14	0.08	0.18	0.09	0.1	0.1	0.12	0.12	0.14	0.13	0.15	0.14	0.16	0.16	0.18	0.18	0.19	0.19	0.2	0.21	0.21	0.23	0.22	0.25	0.22	0.27	0.23	0.29	0.24	0.31	0.32	0.33	0.33	0.36	0.34	0.38	0.34	0.4	0.35	0.42	0.36	0.45
2104	0.04	0.02	0.05	0.05	0.06	0.09	0.07	0.14	0.08	0.18	0.09	0.36	0.1	0.41	0.12	0.47	0.13	0.51	0.14	0.56	0.16	0.6	0.18	0.64	0.19	0.67	0.21	0.7	0.23	0.73	0.25	0.76	0.27	0.79	0.29	0.81	0.31	0.71	0.33	0.73	0.36	0.75	0.38	0.77	0.4	0.78	0.42	0.8	0.45
2105	0	0	0	0	0	0	0	0	0	0	0	0	0	0	0	0	0	0	0	0	0	0	0	0	0	0	0	0	0	0	0	0	0	0	0	0	0	0	0	0	0	0	0	0	0	0	0	0	0
2201	0	0	0	0	0	0	0	0	0	0	0	0	0	0	0	0	0	0	0	0	0	0	0	0	0	0	0	0	0	0	0	0	0	0	0	0	0	0	0	0	0	0	0	0	0	0	0	0	0
2202	0	0	0.01	0	0.02	0	0.04	0.01	0.05	0.02	0.07	0.07	0.09	0.09	0.11	0.11	0.13	0.13	0.16	0.15	0.18	0.17	0.2	0.19	0.23	0.21	0.26	0.23	0.29	0.25	0.31	0.26	0.34	0.28	0.38	0.3	0.41	0.27	0.44	0.28	0.47	0.3	0.51	0.32	0.54	0.34	0.58	0.35	0.61
2203	0	0	0	0	0	0	0.01	0	0.02	0.01	0.04	0.05	0.06	0.07	0.08	0.09	0.1	0.11	0.13	0.13	0.15	0.15	0.17	0.17	0.2	0.19	0.23	0.21	0.26	0.23	0.28	0.25	0.31	0.27	0.35	0.29	0.38	0.25	0.41	0.27	0.44	0.29	0.48	0.3	0.51	0.32	0.55	0.34	0.58
2204	0.14	0.04	0.15	0.01	0.16	0.02	0.18	0.03	0.19	0.05	0.21	0.03	0.23	0.03	0.25	0.03	0.27	0.04	0.3	0.04	0.32	0.04	0.34	0.05	0.37	0.05	0.4	0.05	0.43	0.06	0.45	0.06	0.48	0.06	0.52	0.07	0.55	0.14	0.58	0.15	0.61	0.16	0.65	0.16	0.68	0.17	0.72	0.18	0.75
2205	0.14	0.04	0.15	0.01	0.16	0.02	0.18	0.03	0.19	0.05	0.21	0.07	0.23	0.08	0.25	0.09	0.27	0.1	0.3	0.1	0.32	0.11	0.34	0.12	0.37	0.13	0.4	0.14	0.43	0.15	0.45	0.15	0.48	0.16	0.52	0.17	0.55	0.25	0.58	0.26	0.61	0.27	0.65	0.28	0.68	0.3	0.72	0.31	0.75
2206	0	0	0	0	0	0	0	0	0	0	0	0	0	0	0	0	0	0	0	0	0	0	0	0	0	0	0	0	0	0	0	0	0	0	0	0	0	0	0	0	0	0	0	0	0	0	0	0	0
2301	0	0	0	0	0	0	0	0	0	0	0	0	0	0	0	0	0	0	0	0	0	0	0	0	0	0	0	0	0	0	0	0	0	0	0	0	0	0	0	0	0	0	0	0	0	0	0	0	0
2302	0	0	0	0	0	0	0	0	0	0	0	0	0	0	0	0	0	0	0	0	0	0	0	0	0	0	0	0	0	0	0	0	0	0	0	0	0	0	0	0	0	0	0	0	0	0	0	0	0
2303	0.02	0.06	0.05	0.09	0.08	0.19	0.11	0.3	0.14	0.42	0.17	0.47	0.2	0.3	0.22	0.27	0.25	0.27	0.28	0.28	0.32	0.31	0.35	0.34	0.38	0.36	0.41	0.39	0.44	0.43	0.47	0.47	0.5	0.52	0.53	0.57	0.56	1.03	0.6	1.13	0.63	1.24	0.66	1.35	0.69	1.48	0.72	1.61	0.75
2304	0	0	0	0	0	0	0	0	0	0	0	0	0.03	0.15	0.05	0.2	0.08	0.25	0.11	0.3	0.15	0.36	0.18	0.42	0.21	0.47	0.24	0.53	0.27	0.6	0.3	0.68	0.33	0.76	0.36	0.86	0.39	1.01	0.43	1.12	0.46	1.25	0.49	1.38	0.52	1.52	0.55	1.67	0.58
2305	0	0	0	0	0	0	0	0	0	0	0.03	0.33	0.06	0.32	0.08	0.34	0.11	0.38	0.14	0.44	0.18	0.51	0.21	0.58	0.24	0.65	0.27	0.72	0.3	0.81	0.33	0.91	0.36	1.02	0.39	1.14	0.42	1.07	0.46	1.19	0.49	1.32	0.52	1.46	0.55	1.61	0.58	1.76	0.61
2306	0	0	0	0	0	0	0	0	0	0	0	0	0	0	0	0	0	0	0	0	0	0	0	0	0.03	0.15	0.06	0.26	0.09	0.36	0.12	0.46	0.15	0.57	0.18	0.68	0.21	0.64	0.25	0.74	0.28	0.85	0.31	0.97	0.34	1.1	0.37	1.23	0.4
2307	0	0	0	0	0	0	0	0	0	0	0	0	0	0	0	0	0	0	0	0	0	0	0	0	0	0	0	0	0	0	0	0	0	0	0	0	0	0	0	0	0	0	0	0	0	0	0	0	0
2401	0	0	0	0	0	0	0	0	0	0	0	0	0	0	0	0	0	0	0	0	0	0	0	0	0	0	0	0	0	0	0	0	0	0	0	0	0	0	0	0	0	0	0	0	0	0	0	0	0
2402	0	0	0	0	0	0	0	0	0	0	0	0	0	0	0	0	0	0	0	0	0	0	0	0	0	0	0	0	0	0	0	0	0	0	0	0	0	0	0	0	0	0	0	0	0	0	0	0	0
2403	0.14	0.27	0.19	0.4	0.23	0.49	0.27	0.56	0.3	0.62	0.33	0.79	0.36	0.84	0.38	0.89	0.41	0.93	0.43	0.97	0.46	1.01	0.48	1.04	0.5	1.07	0.52	1.1	0.55	1.13	0.57	1.16	0.59	1.19	0.61	1.21	0.63	0.49	0.64	0.5	0.66	0.51	0.68	0.52	0.7	0.52	0.72	0.53	0.73
2404	0.14	0.11	0.19	0.16	0.23	0.19	0.27	0.22	0.3	0.25	0.33	0.13	0.36	0.14	0.38	0.15	0.41	0.16	0.43	0.16	0.46	0.17	0.48	0.18	0.5	0.18	0.52	0.19	0.55	0.19	0.57	0.2	0.59	0.2	0.61	0.21	0.63	0.37	0.64	0.38	0.66	0.38	0.68	0.39	0.7	0.4	0.72	0.4	0.73
2405	0.16	0.06	0.21	0.08	0.25	0.1	0.29	0.11	0.32	0.13	0.35	0.22	0.38	0.23	0.4	0.24	0.43	0.25	0.45	0.26	0.48	0.27	0.5	0.28	0.52	0.29	0.54	0.3	0.57	0.31	0.59	0.31	0.61	0.32	0.63	0.33	0.65	0.57	0.66	0.58	0.68	0.59	0.7	0.6	0.72	0.61	0.74	0.62	0.75
2406	0	0	0.01	0.01	0.05	0.03	0.09	0.05	0.12	0.07	0.15	0.14	0.18	0.16	0.2	0.18	0.23	0.19	0.25	0.21	0.28	0.22	0.3	0.23	0.32	0.25	0.34	0.26	0.37	0.27	0.39	0.28	0.41	0.29	0.43	0.29	0.45	0.54	0.46	0.56	0.48	0.57	0.5	0.59	0.52	0.6	0.54	0.61	0.55
2407	0	0	0	0	0	0	0	0	0	0	0	0	0	0	0	0	0	0	0	0	0	0	0	0	0	0	0	0	0	0	0	0	0	0	0	0	0	0	0	0	0	0	0	0	0	0	0	0	0
2501	0	0	0	0	0	0	0	0	0	0	0	0	0	0	0	0	0	0	0	0	0	0	0	0	0	0	0	0	0	0	0	0	0	0	0	0	0	0	0	0	0	0	0	0	0	0	0	0	0
2502	0.45	0.01	0.47	0.03	0.49	0.05	0.51	0.07	0.53	0.09	0.55	0.06	0.57	0.07	0.59	0.08	0.61	0.08	0.63	0.09	0.66	0.1	0.68	0.1	0.7	0.11	0.73	0.12	0.75	0.12	0.78	0.13	0.8	0.13	0.83	0.13	0.85	0.12	0.88	0.12	0.9	0.13	0.93	0.13	0.96	0.13	0.98	0.13	1.01
2503	0.32	0.01	0.34	0.03	0.36	0.04	0.38	0.06	0.4	0.07	0.42	0.13	0.44	0.15	0.46	0.17	0.48	0.19	0.5	0.2	0.53	0.22	0.55	0.24	0.57	0.25	0.6	0.26	0.62	0.28	0.65	0.29	0.67	0.3	0.7	0.31	0.72	0.24	0.75	0.25	0.77	0.26	0.8	0.26	0.83	0.27	0.85	0.27	0.88
2504	0.02	0	0.04	0.01	0.06	0.01	0.08	0.02	0.1	0.02	0.12	0.01	0.14	0.01	0.16	0.01	0.18	0.01	0.2	0.01	0.23	0.01	0.25	0.01	0.27	0.02	0.3	0.02	0.32	0.02	0.35	0.02	0.37	0.02	0.4	0.02	0.42	0.14	0.45	0.14	0.47	0.15	0.5	0.15	0.53	0.16	0.55	0.16	0.58
2505	0.02	0	0.04	0.01	0.06	0.01	0.08	0.02	0.1	0.02	0.12	0.01	0.14	0.01	0.16	0.01	0.18	0.01	0.2	0.01	0.23	0.01	0.25	0.01	0.27	0.02	0.3	0.02	0.32	0.02	0.35	0.02	0.37	0.02	0.4	0.02	0.42	0.09	0.45	0.1	0.47	0.1	0.5	0.1	0.53	0.11	0.55	0.11	0.58
2506	0	0	0	0	0	0	0	0	0	0	0	0	0	0	0	0	0	0	0	0	0	0	0	0	0	0	0	0	0	0	0	0	0	0	0	0	0	0	0	0	0	0	0	0	0	0	0	0	0
2601	0	0	0	0	0	0	0	0	0	0	0	0	0	0	0	0	0	0	0	0	0	0	0	0	0	0	0	0	0	0	0	0	0	0	0	0	0	0	0	0	0	0	0	0	0	0	0	0	0
2602	0.21	0.06	0.22	0.1	0.23	0.13	0.25	0.15	0.26	0.16	0.28	0.18	0.29	0.19	0.31	0.2	0.33	0.2	0.34	0.21	0.36	0.21	0.38	0.22	0.4	0.22	0.42	0.22	0.44	0.22	0.46	0.22	0.48	0.22	0.5	0.22	0.52	0.01	0.54	0.01	0.56	0.01	0.58	0.01	0.6	0.01	0.62	0.01	0.64
2603	0.16	0.04	0.17	0.07	0.18	0.08	0.2	0.1	0.21	0.11	0.23	0.15	0.24	0.16	0.26	0.17	0.28	0.18	0.29	0.19	0.31	0.19	0.33	0.19	0.35	0.2	0.37	0.2	0.39	0.2	0.41	0.2	0.43	0.2	0.45	0.2	0.47	0.15	0.49	0.15	0.51	0.15	0.53	0.15	0.55	0.15	0.57	0.15	0.59
2604	0.24	0.08	0.25	0.14	0.26	0.18	0.28	0.21	0.29	0.23	0.31	0.24	0.32	0.26	0.34	0.27	0.36	0.28	0.37	0.28	0.39	0.29	0.41	0.29	0.43	0.29	0.45	0.29	0.47	0.29	0.49	0.29	0.51	0.29	0.53	0.29	0.55	0.7	0.57	0.7	0.59	0.7	0.61	0.7	0.63	0.69	0.65	0.69	0.67
2605	0.06	0.14	0.07	0.24	0.08	0.34	0.1	0.43	0.11	0.5	0.13	0.33	0.14	0.36	0.16	0.39	0.18	0.42	0.19	0.44	0.21	0.46	0.23	0.48	0.25	0.49	0.27	0.5	0.29	0.51	0.31	0.52	0.33	0.53	0.35	0.53	0.37	0.6	0.39	0.61	0.41	0.61	0.43	0.62	0.45	0.62	0.47	0.62	0.49
2606	0	0	0	0	0	0	0	0	0	0	0	0	0	0	0	0	0	0	0	0	0	0	0	0	0	0	0	0	0	0	0	0	0	0	0	0	0	0	0	0	0	0	0	0	0	0	0	0	0
2701	0	0	0	0	0	0	0	0	0	0	0	0	0	0	0	0	0	0	0	0	0	0	0	0	0	0	0	0	0	0	0	0	0	0	0	0	0	0	0	0	0	0	0	0	0	0	0.01	0.01	0.02
2702	0.43	0.01	0.47	0.02	0.5	0.03	0.53	0.05	0.55	0.06	0.57	0.04	0.59	0.05	0.61	0.06	0.63	0.07	0.64	0.08	0.66	0.09	0.67	0.1	0.69	0.11	0.7	0.12	0.72	0.13	0.73	0.14	0.74	0.14	0.75	0.15	0.77	0.15	0.78	0.15	0.79	0.16	0.8	0.17	0.81	0.18	0.82	0.19	0.83
2703	0.07	0	0.11	0.01	0.14	0.01	0.17	0.02	0.19	0.03	0.21	0.02	0.23	0.03	0.25	0.04	0.27	0.04	0.28	0.05	0.3	0.06	0.31	0.06	0.33	0.07	0.34	0.08	0.36	0.08	0.37	0.09	0.38	0.1	0.39	0.11	0.41	0.03	0.42	0.03	0.43	0.03	0.44	0.04	0.45	0.04	0.46	0.04	0.47
2704	0.12	0	0.16	0.01	0.19	0.02	0.22	0.03	0.24	0.03	0.26	0.02	0.28	0.03	0.3	0.03	0.32	0.04	0.33	0.04	0.35	0.05	0.36	0.05	0.38	0.06	0.39	0.06	0.41	0.07	0.42	0.08	0.43	0.08	0.44	0.09	0.46	0.15	0.47	0.16	0.48	0.17	0.49	0.18	0.5	0.19	0.51	0.2	0.52
2705	0.26	0.01	0.3	0.01	0.33	0.02	0.36	0.03	0.38	0.05	0.4	0.12	0.42	0.14	0.44	0.17	0.46	0.19	0.47	0.22	0.49	0.25	0.5	0.27	0.52	0.3	0.53	0.33	0.55	0.36	0.56	0.39	0.57	0.41	0.58	0.44	0.6	0.47	0.61	0.5	0.62	0.53	0.63	0.56	0.64	0.58	0.65	0.61	0.66
2706	0	0	0	0	0	0	0	0	0	0	0	0	0	0	0	0	0	0	0	0	0	0	0	0	0	0	0	0	0	0	0	0	0	0	0	0	0	0	0	0	0	0	0	0	0	0	0	0	0
2801	0	0	0	0	0	0	0	0	0	0	0	0	0	0	0	0	0	0	0	0	0	0	0	0	0	0	0	0	0	0	0	0	0	0	0	0	0	0	0	0	0	0	0	0	0	0	0	0	0
2802	0.17	0.03	0.18	0.07	0.19	0.11	0.21	0.15	0.23	0.17	0.25	0.11	0.27	0.11	0.29	0.12	0.32	0.13	0.34	0.13	0.37	0.13	0.4	0.13	0.43	0.14	0.46	0.14	0.49	0.14	0.53	0.14	0.56	0.14	0.6	0.14	0.64	0.09	0.67	0.09	0.71	0.09	0.75	0.09	0.8	0.09	0.84	0.09	0.88
2803	0.07	0.02	0.08	0.04	0.09	0.07	0.11	0.1	0.13	0.12	0.15	0.08	0.17	0.08	0.19	0.09	0.22	0.1	0.24	0.1	0.27	0.11	0.3	0.11	0.33	0.11	0.36	0.12	0.39	0.12	0.43	0.12	0.46	0.12	0.5	0.13	0.54	0.06	0.57	0.06	0.61	0.06	0.65	0.06	0.7	0.06	0.74	0.06	0.78
2804	0.07	0.03	0.08	0.07	0.09	0.12	0.11	0.16	0.13	0.2	0.15	0.36	0.17	0.4	0.19	0.44	0.22	0.47	0.24	0.49	0.27	0.51	0.3	0.53	0.33	0.54	0.36	0.56	0.39	0.57	0.43	0.58	0.46	0.59	0.5	0.59	0.54	0.71	0.57	0.71	0.61	0.72	0.65	0.72	0.7	0.73	0.74	0.73	0.78
2805	0	0	0	0	0	0	0	0	0	0	0	0	0	0	0	0	0	0	0	0	0	0	0	0	0	0	0	0	0	0	0	0	0	0	0	0	0	0	0	0	0	0	0	0	0	0	0	0	0
2901	0	0	0	0	0	0	0	0	0	0	0	0	0	0	0	0	0	0	0	0	0	0	0	0	0	0	0	0	0	0	0	0	0	0	0	0	0	0	0	0	0	0	0	0	0	0	0	0	0
2902	0.01	0	0.03	0	0.05	0	0.07	0	0.09	0.01	0.11	0.11	0.14	0.15	0.16	0.19	0.18	0.24	0.21	0.29	0.23	0.34	0.26	0.39	0.29	0.45	0.31	0.5	0.34	0.56	0.37	0.61	0.4	0.67	0.42	0.73	0.45	0.04	0.48	0.04	0.51	0.04	0.54	0.05	0.57	0.05	0.6	0.06	0.63
2903	0.01	0	0.03	0	0.05	0	0.07	0	0.09	0.01	0.11	0.01	0.14	0.01	0.16	0.02	0.18	0.02	0.21	0.03	0.23	0.03	0.26	0.04	0.29	0.04	0.31	0.05	0.34	0.06	0.37	0.06	0.4	0.07	0.42	0.07	0.45	0.15	0.48	0.17	0.51	0.18	0.54	0.19	0.57	0.21	0.6	0.22	0.63
2904	0.31	0.01	0.33	0	0.35	0.01	0.37	0.01	0.39	0.02	0.41	0.03	0.44	0.04	0.46	0.05	0.48	0.05	0.51	0.06	0.53	0.07	0.56	0.08	0.59	0.08	0.61	0.09	0.64	0.1	0.67	0.11	0.7	0.11	0.72	0.12	0.75	0.17	0.78	0.19	0.81	0.2	0.84	0.21	0.87	0.22	0.9	0.24	0.93
2905	0.31	0.01	0.33	0	0.35	0.01	0.37	0.01	0.39	0.02	0.41	0.01	0.44	0.02	0.46	0.02	0.48	0.03	0.51	0.03	0.53	0.03	0.56	0.04	0.59	0.04	0.61	0.05	0.64	0.05	0.67	0.05	0.7	0.06	0.72	0.06	0.75	0.19	0.78	0.2	0.81	0.22	0.84	0.23	0.87	0.24	0.9	0.26	0.93
2906	0	0	0	0	0	0	0	0	0	0	0	0	0	0	0	0	0	0	0	0	0	0	0	0	0	0	0	0	0	0	0	0	0	0	0	0	0	0	0	0	0	0	0	0	0	0	0	0	0
3001	0	0	0	0	0	0	0	0	0	0	0	0	0	0	0	0	0	0	0	0	0	0	0	0	0	0	0	0	0	0	0	0	0	0	0	0	0	0	0	0	0	0	0	0	0	0	0	0	0
3002	0	0	0	0	0	0	0	0	0	0	0	0	0	0	0	0	0	0	0	0	0	0	0	0	0	0	0	0	0	0	0	0	0	0	0	0	0	0	0	0	0	0	0	0	0	0	0	0	0
3003	0.13	0.03	0.15	0.05	0.17	0.06	0.19	0.07	0.21	0.08	0.23	0.09	0.26	0.1	0.28	0.1	0.3	0.11	0.32	0.12	0.34	0.12	0.36	0.13	0.39	0.13	0.41	0.13	0.43	0.14	0.45	0.14	0.47	0.14	0.5	0.15	0.52	0.26	0.54	0.27	0.56	0.27	0.59	0.27	0.61	0.27	0.63	0.28	0.65
3004	0.69	0.7	0.71	1.02	0.73	1.22	0.75	1.38	0.77	1.49	0.79	1.59	0.82	1.66	0.84	1.72	0.86	1.76	0.88	1.79	0.9	1.82	0.92	1.84	0.95	1.86	0.97	1.87	0.99	1.88	1.01	1.88	1.03	1.88	1.06	1.89	1.08	1.83	1.1	1.83	1.12	1.82	1.15	1.82	1.17	1.81	1.19	1.81	1.21
3005	0	0	0.01	0.06	0.03	0.15	0.05	0.23	0.07	0.31	0.09	0.35	0.12	0.41	0.14	0.47	0.16	0.52	0.18	0.57	0.2	0.61	0.22	0.65	0.25	0.69	0.27	0.72	0.29	0.75	0.31	0.78	0.33	0.81	0.36	0.83	0.38	0.82	0.4	0.84	0.42	0.86	0.45	0.87	0.47	0.89	0.49	0.9	0.51
3006	0	0	0	0	0	0	0	0	0	0	0	0	0	0	0	0	0	0	0	0	0	0	0	0	0	0	0	0	0	0	0	0	0	0	0	0	0	0	0	0	0	0	0	0	0	0	0	0	0
3101	0	0	0	0	0	0	0	0	0	0	0	0	0	0	0	0	0	0	0	0	0	0	0	0	0	0	0	0	0	0	0	0	0	0	0	0	0	0	0	0	0	0	0	0	0	0	0	0	0
3102	0	0	0	0	0	0	0	0	0	0	0	0	0	0	0	0	0	0	0	0	0	0	0	0	0	0	0	0	0	0	0	0	0	0	0	0	0	0	0	0	0	0	0	0	0	0	0	0	0
3103	0.15	0.08	0.2	0.1	0.24	0.1	0.28	0.11	0.32	0.11	0.36	0.11	0.4	0.11	0.44	0.11	0.48	0.11	0.52	0.11	0.55	0.11	0.59	0.11	0.62	0.11	0.66	0.11	0.7	0.11	0.73	0.11	0.77	0.11	0.8	0.11	0.83	0.29	0.87	0.29	0.9	0.29	0.94	0.29	0.97	0.29	1	0.29	1.04
3104	0.05	0.75	0.1	1.08	0.14	1.28	0.18	1.41	0.22	1.51	0.26	1.59	0.3	1.65	0.34	1.7	0.38	1.74	0.42	1.77	0.45	1.8	0.49	1.82	0.52	1.84	0.56	1.86	0.6	1.87	0.63	1.89	0.67	1.9	0.7	1.91	0.73	1.7	0.77	1.7	0.8	1.71	0.84	1.71	0.87	1.72	0.9	1.72	0.94
3105	0	0	0	0	0	0	0	0	0	0	0	0	0	0	0	0	0	0	0	0	0	0	0	0	0	0	0	0	0	0	0	0	0	0	0	0	0	0	0	0	0	0	0	0	0	0	0	0	0
3106	0	0	0	0	0	0	0	0	0	0	0	0	0	0	0	0	0	0	0	0	0	0	0	0	0	0	0	0	0	0	0	0	0	0	0	0	0	0	0	0	0	0	0	0	0	0	0	0	0
3201	0	0	0	0	0	0	0	0	0	0	0	0	0	0	0	0	0	0	0	0	0	0	0	0	0	0	0	0	0	0	0	0	0	0	0	0	0	0	0	0	0	0	0	0	0	0	0	0	0
3202	0.01	0.03	0.02	0.01	0.03	0.01	0.04	0.02	0.05	0.03	0.06	0.01	0.08	0.01	0.09	0.02	0.11	0.02	0.13	0.02	0.15	0.03	0.17	0.03	0.19	0.03	0.21	0.04	0.23	0.04	0.25	0.04	0.28	0.04	0.3	0.05	0.33	0.07	0.36	0.07	0.38	0.07	0.41	0.07	0.44	0.08	0.47	0.08	0.5
3203	0.27	0.25	0.28	0.03	0.29	0.06	0.3	0.08	0.31	0.11	0.32	0.16	0.34	0.19	0.35	0.22	0.37	0.25	0.39	0.27	0.41	0.29	0.43	0.31	0.45	0.33	0.47	0.34	0.49	0.35	0.51	0.36	0.54	0.37	0.56	0.38	0.59	0.36	0.62	0.37	0.64	0.37	0.67	0.37	0.7	0.37	0.73	0.37	0.76
3204	0	0	0	0	0	0	0	0	0	0	0	0	0	0	0	0	0	0	0	0	0	0	0	0	0	0	0	0	0	0	0	0	0	0	0	0	0	0	0	0	0	0	0	0	0	0	0	0	0
3205	0	0	0	0	0	0	0	0	0	0	0	0	0	0	0	0	0	0	0	0	0	0	0	0	0	0	0	0	0	0	0	0	0	0	0	0	0	0	0	0	0	0	0	0	0	0	0	0	0
3301	0	0	0	0	0	0	0	0	0	0	0	0	0	0	0	0	0	0	0	0	0	0	0	0	0	0	0	0	0	0	0	0	0	0	0	0	0	0	0	0	0	0	0	0	0	0	0	0	0
3302	0.12	0.03	0.13	0.08	0.15	0.12	0.16	0.15	0.18	0.18	0.2	0.01	0.22	0.01	0.24	0.01	0.27	0.01	0.29	0.01	0.31	0.01	0.34	0.01	0.36	0.01	0.38	0.01	0.41	0.01	0.43	0.01	0.46	0.01	0.49	0.01	0.51	0.21	0.54	0.21	0.56	0.21	0.59	0.21	0.62	0.22	0.65	0.22	0.68
3303	0.1	0.03	0.11	0.07	0.13	0.11	0.14	0.14	0.16	0.17	0.18	0.37	0.2	0.41	0.22	0.44	0.25	0.47	0.27	0.49	0.29	0.51	0.32	0.53	0.34	0.54	0.36	0.55	0.39	0.56	0.41	0.57	0.44	0.58	0.47	0.58	0.49	0.42	0.52	0.42	0.54	0.43	0.57	0.43	0.6	0.43	0.63	0.43	0.66
3304	0	0	0	0	0	0	0	0	0	0	0	0	0	0	0	0	0	0	0	0	0	0	0	0	0	0	0	0	0	0	0	0	0	0	0	0	0	0	0	0	0	0	0	0	0	0	0	0	0
3305	0	0	0	0	0	0	0	0	0	0	0	0	0	0	0	0	0	0	0	0	0	0	0	0	0	0	0	0	0	0	0	0	0	0	0	0	0	0	0	0	0	0	0	0	0	0	0	0	0
3401	0	0	0	0	0	0	0	0	0	0	0	0	0	0	0	0	0	0	0	0	0	0	0	0	0	0	0	0	0	0	0	0	0	0	0	0	0	0	0	0	0	0	0	0	0	0	0	0	0
3402	0	0	0	0	0	0	0	0	0	0	0	0	0	0	0	0	0	0	0	0	0	0	0	0	0	0	0	0	0	0	0	0	0	0	0	0	0	0	0	0	0	0	0	0	0	0	0	0	0
3403	0.08	0.03	0.09	0.05	0.1	0.07	0.11	0.08	0.12	0.09	0.13	0.14	0.14	0.16	0.16	0.17	0.17	0.18	0.19	0.18	0.21	0.19	0.22	0.19	0.24	0.19	0.26	0.2	0.28	0.2	0.3	0.2	0.32	0.2	0.34	0.2	0.36	0.27	0.38	0.26	0.41	0.26	0.43	0.25	0.45	0.25	0.48	0.24	0.5
3404	0.32	0.08	0.33	0.12	0.34	0.15	0.35	0.18	0.36	0.2	0.37	0.17	0.38	0.18	0.4	0.19	0.41	0.19	0.43	0.19	0.45	0.19	0.46	0.19	0.48	0.19	0.5	0.18	0.52	0.18	0.54	0.18	0.56	0.17	0.58	0.17	0.6	0.08	0.62	0.08	0.65	0.08	0.67	0.08	0.69	0.08	0.72	0.07	0.74
3405	0	0	0	0	0	0	0	0	0	0	0	0	0	0	0	0	0	0	0	0	0	0	0	0	0	0	0	0	0	0	0	0	0	0	0	0	0	0	0	0	0	0	0	0	0	0	0	0	0
3501	0	0	0	0	0	0	0	0	0	0	0	0	0	0	0	0	0	0	0	0	0	0	0	0	0	0	0	0	0	0	0	0	0	0	0	0	0	0	0	0	0	0	0	0	0	0	0	0	0
3502	0.11	0.06	0.12	0.02	0.13	0.04	0.14	0.06	0.15	0.09	0.16	0.05	0.17	0.07	0.19	0.08	0.2	0.09	0.22	0.11	0.23	0.12	0.25	0.13	0.27	0.14	0.29	0.15	0.31	0.16	0.32	0.17	0.35	0.18	0.37	0.19	0.39	0.1	0.41	0.1	0.43	0.11	0.46	0.11	0.48	0.11	0.5	0.12	0.53
3503	0.19	0.08	0.2	0.03	0.21	0.05	0.22	0.08	0.23	0.12	0.24	0.22	0.25	0.26	0.27	0.31	0.28	0.36	0.3	0.41	0.31	0.45	0.33	0.49	0.35	0.53	0.37	0.56	0.39	0.59	0.4	0.63	0.43	0.65	0.45	0.68	0.47	0.83	0.49	0.86	0.51	0.89	0.54	0.92	0.56	0.94	0.58	0.96	0.61
3504	0	0	0	0	0	0	0	0	0	0	0	0	0	0	0	0	0	0	0	0	0	0	0	0	0	0	0	0	0	0	0	0	0	0	0	0	0	0	0	0	0	0	0	0	0	0	0	0	0
[truncated: 49 more columns]

## Sheet: Rock cell data
Cell data for Trask at Rock Creek	BEP 8/11/08 to 8/14/2008
File generated 7/19/12 by SFRailsback	Updated 8/17 with new input from Brooke
CellNum	FracShelter	DistHide	FracSpawn	ReachEndCode
101	0	0	0	I
102	0.08	2	0.03	D
103	0.05	0.5	0	D
104	0.05	0.5	0	D
105	0	0	0	I
201	0	0	0	I
202	0.15	0.5	0	I
203	0.2	0.1	0	I
204	0.05	0.5	0.05	I
205	0	0	0	I
301	0	0	0	I
302	0.15	0.5	0.05	I
303	0.15	0.25	0	I
304	0.2	0.25	0.05	I
305	0	0	0	I
401	0	0	0	I
402	0.08	0.25	0	I
403	0.2	0.5	0.05	I
404	0.3	0.25	0.1	I
405	0.15	0.1	0.03	I
406	0	0	0	I
501	0	0	0	I
502	0.2	1	0	I
503	0.1	1	0.05	I
504	0.1	0.5	0	I
505	0	0	0	I
601	0	0	0	I
602	0.03	1	0	I
603	0.15	0.25	0	I
604	0.05	0.5	0.05	I
605	0.05	0.5	0.05	I
606	0	0	0	I
701	0	0	0	I
702	0.15	0.5	0.05	I
703	0.15	0.25	0.05	I
704	0.4	0.1	0.03	I
705	0.4	0.25	0.05	I
706	0.5	0.1	0	I
707	0	0	0	I
801	0	0	0	I
802	0.25	0.2	0.03	I
803	0.3	0.2	0.15	I
804	0	0	0	I
901	0	0	0	I
902	0.03	0.25	0	I
903	0.15	0.25	0.05	I
904	0.15	0.25	0.03	I
905	0.05	0.5	0.05	I
906	0	0	0	I
1001	0	0	0	I
1002	0.3	0.5	0	I
1003	0.1	0.5	0	I
1004	0.03	1	0	I
1005	0	0	0	I
1101	0	0	0	I
1102	0.1	0.25	0	I
1103	0.03	0.75	0	I
1104	0.6	0.2	0.1	I
1105	0.6	0.1	0	I
1106	0	0	0	I
1201	0	0	0	I
1202	0.4	0.1	0	I
1203	0.2	0.25	0	I
1204	0.3	0.5	0	I
1205	0.6	0.25	0.1	I
1206	0.4	0.1	0	I
1207	0	0	0	I
1301	0	0	0	I
1302	0.6	0.25	0	I
1303	0.6	0.25	0	I
1304	0.15	0.5	0	I
1305	0.25	0.1	0	I
1306	0.15	0.5	0	I
1307	0	0	0	I
1401	0	0	0	I
1402	0.1	0.25	0	I
1403	0.1	0.5	0	I
1404	0.05	1	0.05	I
1405	0.2	0.5	0.05	I
1406	0.25	0.25	0.1	I
1407	0	0	0	I
1501	0	0	0	I
1502	0.05	0.25	0	I
1503	0.15	0.25	0.05	I
1504	0.25	0.1	0	I
1505	0.25	0.1	0	I
1506	0	0	0	I
1601	0	0	0	I
1602	0.15	0.75	0	I
1603	0.2	0.5	0	I
1604	0.25	0.25	0.03	I
1605	0	0	0	I
1701	0	0	0	I
1702	0.1	0.75	0.05	I
1703	0.5	0.2	0	I
1704	0.15	0.5	0.03	I
1705	0	0	0	I
1801	0	0	0	I
1802	0.2	0.25	0	I
1803	0.15	0.5	0	I
1804	0.1	0.5	0.03	I
1805	0.1	1	0	I
1806	0	0	0	I
1901	0	0	0	I
1902	0.5	0.25	0	I
1903	0.4	0.3	0	I
1904	0.5	0.1	0	I
1905	0.6	0.1	0	I
1906	0.2	0.75	0	I
1907	0	0	0	I
2001	0	0	0	I
2002	0.15	0.5	0.03	I
2003	0.15	0.25	0.05	I
2004	0.15	0.25	0	I
2005	0.15	0.5	0.1	I
2006	0	0	0	I
2101	0	0	0	I
2102	0.25	0.25	0.08	I
2103	0.2	0.25	0	I
2104	0.05	1.25	0	I
2105	0	0	0	I
2201	0	0	0	I
2202	0.25	0.1	0	I
2203	0.15	0.25	0	I
2204	0.2	0.1	0.03	I
2205	0.1	0.5	0	I
2206	0	0	0	I
2301	0	0	0	I
2302	0.1	0.25	0	I
2303	0.15	0.25	0.03	I
2304	0.6	0.5	0	I
2305	0.6	0.25	0.05	I
2306	0.25	0.5	0	I
2307	0	0	0	I
2401	0	0	0	I
2402	0.3	0.25	0	I
2403	0.3	0.25	0	I
2404	0.1	0.25	0.03	I
2405	0.05	0.5	0	I
2406	0.1	1	0	I
2407	0	0	0	I
2501	0	0	0	I
2502	0.05	1	0	I
2503	0.5	2	0.05	I
2504	0.1	0.1	0	I
2505	0.15	1	0	I
2506	0	0	0	I
2601	0	0	0	I
2602	0.25	0.5	0	I
2603	0.4	0.25	0	I
2604	0.6	0.25	0	I
2605	0	0	0	I
2701	0	0	0	I
2702	0.1	1	0	I
2703	0.25	0.25	0	I
2704	0.25	0.5	0	I
2705	0.15	0.5	0	I
2706	0	0	0	I
2801	0	0	0	I
2802	0.05	1	0	I
2803	0.4	0.1	0	I
2804	0.4	0.25	0.05	I
2805	0.25	0.1	0	I
2806	0	0	0	I
2901	0	0	0	I
2902	0.1	0.75	0	I
2903	0.2	0.5	0	I
2904	0.75	0.2	0.03	I
2905	0.1	1.25	0	I
2906	0	0	0	I
3001	0	0	0	I
3002	0.6	0.1	0.05	I
3003	0.5	0.25	0.05	I
3004	0.25	0.75	0	I
3005	0	0	0	I
3101	0	0	0	I
3102	0.2	0.5	0	U
3103	0.2	1.5	0.1	U
3104	0.1	1.5	0	U
3105	0	0	0	I

## Sheet: Rock hyd data
Hydraulic file for Trask site Rock
Created for inSTREAM v. 5 from v. 4.2 depth-velocity output file		SFR 19 July 2012	Flow in m3/s
Flows:	0.02		0.03		0.04		0.05		0.06		0.08		0.1		0.12		0.14		0.16		0.18		0.2		0.22		0.24		0.26		0.28		0.3		0.32		0.34		0.36		0.38		0.4		0.42		0.44		0.46
CellNum	Depth@0.02	Vel@0.02	Depth@0.03	Vel@0.03	Depth@0.04	Vel@0.04	Depth@0.05	Vel@0.05	Depth@0.06	Vel@0.06	Depth@0.08	Vel@0.08	Depth@0.1	Vel@0.1	Depth@0.12	Vel@0.12	Depth@0.14	Vel@0.14	Depth@0.16	Vel@0.16	Depth@0.18	Vel@0.18	Depth@0.2	Vel@0.2	Depth@0.22	Vel@0.22	Depth@0.24	Vel@0.24	Depth@0.26	Vel@0.26	Depth@0.28	Vel@0.28	Depth@0.3	Vel@0.3	Depth@0.32	Vel@0.32	Depth@0.34	Vel@0.34	Depth@0.36	Vel@0.36	Depth@0.38	Vel@0.38	Depth@0.4	Vel@0.4	Depth@0.42	Vel@0.42	Depth@0.44	Vel@0.44	Depth@0.46
101	0	0	0	0	0	0	0	0	0	0	0	0	0	0	0	0	0	0	0	0	0	0	0	0	0	0	0	0	0	0	0	0	0	0	0	0	0	0	0	0	0	0	0	0	0	0	0	0	0
102	0.01	0	0.01	0.01	0.01	0.01	0.01	0.01	0.01	0.01	0.01	0.02	0.02	0.03	0.02	0.04	0.02	0.05	0.03	0.07	0.03	0.08	0.03	0.02	0.04	0.02	0.04	0.02	0.05	0.03	0.05	0.03	0.06	0.03	0.06	0.03	0.07	0.03	0.07	0.04	0.08	0.04	0.08	0.04	0.09	0.04	0.09	0.04	0.1
103	0.06	0.01	0.06	0.02	0.06	0.03	0.06	0.04	0.06	0.05	0.06	0.07	0.07	0.09	0.07	0.11	0.07	0.12	0.08	0.14	0.08	0.15	0.08	0.23	0.09	0.25	0.09	0.27	0.1	0.29	0.1	0.3	0.11	0.32	0.11	0.33	0.12	0.34	0.12	0.35	0.13	0.36	0.13	0.37	0.14	0.38	0.14	0.39	0.15
104	0.15	0.03	0.15	0.05	0.15	0.06	0.15	0.08	0.15	0.1	0.15	0.13	0.16	0.17	0.16	0.2	0.16	0.23	0.17	0.25	0.17	0.27	0.17	0.26	0.18	0.28	0.18	0.3	0.19	0.31	0.19	0.32	0.2	0.33	0.2	0.34	0.21	0.35	0.21	0.36	0.22	0.36	0.22	0.37	0.23	0.37	0.23	0.38	0.24
105	0	0	0	0	0	0	0	0	0	0	0	0	0	0	0	0	0	0	0	0	0	0	0	0	0	0	0	0	0	0	0	0	0	0	0	0	0	0	0	0	0	0	0	0	0	0	0	0	0
201	0	0	0	0	0	0	0	0	0	0	0	0	0	0	0	0	0	0	0	0	0	0	0	0	0	0	0	0	0	0	0	0	0	0	0	0	0	0	0	0	0	0	0	0	0	0	0	0	0
202	0.02	0.01	0.02	0.01	0.02	0.01	0.02	0.01	0.02	0.02	0.02	0.03	0.02	0.03	0.02	0.04	0.03	0.05	0.03	0.06	0.03	0.07	0.03	0.06	0.04	0.07	0.04	0.08	0.04	0.08	0.05	0.09	0.05	0.1	0.06	0.11	0.06	0.12	0.07	0.12	0.07	0.13	0.08	0.14	0.08	0.15	0.09	0.15	0.09
203	0.1	0.02	0.1	0.02	0.1	0.03	0.1	0.04	0.1	0.05	0.1	0.07	0.1	0.09	0.1	0.1	0.11	0.12	0.11	0.14	0.11	0.16	0.11	0.22	0.12	0.24	0.12	0.26	0.12	0.28	0.13	0.3	0.13	0.31	0.14	0.33	0.14	0.35	0.15	0.36	0.15	0.37	0.16	0.38	0.16	0.39	0.17	0.4	0.17
204	0.24	0.04	0.24	0.06	0.24	0.08	0.24	0.11	0.24	0.13	0.24	0.17	0.24	0.22	0.24	0.26	0.25	0.3	0.25	0.34	0.25	0.38	0.25	0.37	0.26	0.4	0.26	0.43	0.26	0.45	0.27	0.48	0.27	0.5	0.28	0.52	0.28	0.53	0.29	0.55	0.29	0.56	0.3	0.57	0.3	0.58	0.31	0.59	0.31
205	0	0	0	0	0	0	0	0	0	0	0	0	0	0	0	0	0	0	0	0	0	0	0	0	0	0	0	0	0	0	0	0	0	0	0	0	0	0	0	0	0	0	0	0	0	0	0	0	0
301	0	0	0	0	0	0	0	0	0	0	0	0	0	0	0	0	0	0	0	0	0	0	0	0	0	0	0	0	0	0	0	0	0	0	0	0	0	0	0	0	0	0	0	0	0	0	0	0	0
302	0	0	0	0	0	0	0	0	0	0	0	0	0	0	0	0	0	0	0	0	0	0	0	0	0	0	0	0	0	0	0	0	0	0	0	0	0	0	0	0	0	0.03	0	0.06	0.01	0.09	0.01	0.11	0.02
303	0.1	0.02	0.1	0.03	0.1	0.04	0.1	0.06	0.1	0.07	0.1	0.09	0.1	0.1	0.1	0.12	0.1	0.14	0.11	0.15	0.11	0.17	0.11	0.31	0.11	0.33	0.12	0.35	0.12	0.37	0.13	0.38	0.13	0.39	0.13	0.4	0.14	0.41	0.14	0.42	0.15	0.42	0.15	0.42	0.16	0.42	0.16	0.41	0.17
304	0.1	0.08	0.1	0.12	0.1	0.16	0.1	0.2	0.1	0.24	0.1	0.31	0.1	0.38	0.1	0.44	0.1	0.5	0.11	0.56	0.11	0.61	0.11	0.51	0.11	0.54	0.12	0.56	0.12	0.59	0.13	0.61	0.13	0.63	0.13	0.65	0.14	0.66	0.14	0.67	0.15	0.67	0.15	0.67	0.16	0.67	0.16	0.67	0.17
305	0	0	0	0	0	0	0	0	0	0	0	0	0	0	0	0	0	0	0	0	0	0	0	0	0	0	0	0	0	0	0	0	0	0	0	0	0	0	0	0	0	0	0	0	0	0	0	0	0
401	0	0	0	0	0	0	0	0	0	0	0	0	0	0	0	0	0	0	0	0	0	0	0	0	0	0	0	0	0	0	0	0	0	0	0	0	0	0	0	0	0	0	0	0	0	0	0	0	0
402	0.01	0	0.01	0	0.01	0	0.01	0.01	0.01	0.01	0.01	0.01	0.01	0.02	0.01	0.03	0.02	0.04	0.02	0.05	0.02	0.06	0.03	0.07	0.03	0.08	0.04	0.09	0.04	0.1	0.05	0.11	0.06	0.12	0.06	0.13	0.07	0.14	0.08	0.15	0.09	0.16	0.09	0.17	0.1	0.17	0.11	0.18	0.12
403	0.17	0.01	0.17	0.01	0.17	0.02	0.17	0.03	0.17	0.04	0.17	0.07	0.17	0.09	0.17	0.12	0.18	0.15	0.18	0.18	0.18	0.21	0.19	0.32	0.19	0.34	0.2	0.37	0.2	0.39	0.21	0.4	0.22	0.42	0.22	0.43	0.23	0.44	0.24	0.44	0.25	0.45	0.25	0.45	0.26	0.45	0.27	0.45	0.28
404	0.05	0.01	0.05	0.02	0.05	0.03	0.05	0.04	0.05	0.06	0.05	0.09	0.05	0.13	0.05	0.18	0.06	0.23	0.06	0.28	0.06	0.33	0.07	0.27	0.07	0.3	0.08	0.33	0.08	0.36	0.09	0.38	0.1	0.41	0.1	0.43	0.11	0.45	0.12	0.47	0.13	0.48	0.13	0.49	0.14	0.51	0.15	0.51	0.16
405	0	0	0	0	0	0	0	0	0	0	0	0	0	0	0	0	0	0	0	0	0	0	0	0.05	0	0.12	0.01	0.18	0.01	0.24	0.02	0.3	0.03	0.36	0.03	0.42	0.04	0.47	0.05	0.52	0.06	0.57	0.06	0.61	0.07	0.65	0.08	0.68	0.09
406	0	0	0	0	0	0	0	0	0	0	0	0	0	0	0	0	0	0	0	0	0	0	0	0	0	0	0	0	0	0	0	0	0	0	0	0	0	0	0	0	0	0	0	0	0	0	0	0	0
501	0	0	0	0	0	0	0	0	0	0	0	0	0	0	0	0	0	0	0	0	0	0	0	0	0	0	0	0	0	0	0	0	0	0	0	0	0	0	0	0	0	0	0	0	0	0	0	0	0
502	0	0	0	0	0	0	0	0	0	0	0	0	0	0	0	0	0	0	0	0	0	0	0	0	0	0	0	0	0	0	0	0	0	0	0	0.01	0	0.02	0.01	0.03	0.01	0.04	0.02	0.04	0.03	0.05	0.03	0.05	0.04
503	0.1	0.03	0.1	0.05	0.1	0.07	0.1	0.1	0.11	0.12	0.11	0.17	0.11	0.21	0.12	0.26	0.12	0.3	0.12	0.34	0.13	0.37	0.13	0.31	0.14	0.33	0.14	0.34	0.15	0.36	0.15	0.37	0.16	0.38	0.17	0.39	0.17	0.4	0.18	0.4	0.18	0.41	0.19	0.41	0.2	0.42	0.2	0.42	0.21
504	0.01	0	0.01	0	0.01	0	0.01	0	0.02	0.01	0.02	0.01	0.02	0.01	0.03	0.02	0.03	0.02	0.03	0.03	0.04	0.03	0.04	0.16	0.05	0.18	0.05	0.19	0.06	0.21	0.06	0.22	0.07	0.24	0.08	0.25	0.08	0.26	0.09	0.27	0.09	0.28	0.1	0.29	0.11	0.3	0.11	0.31	0.12
505	0	0	0	0	0	0	0	0	0	0	0	0	0	0	0	0	0	0	0	0	0	0	0	0	0	0	0	0	0	0	0	0	0	0	0	0	0	0	0	0	0	0	0	0	0	0	0	0	0
601	0	0	0	0	0	0	0	0	0	0	0	0	0	0	0	0	0	0	0	0	0	0	0	0	0	0	0	0	0	0	0	0	0	0	0	0	0	0	0	0	0	0	0	0	0	0	0	0	0
602	0	0	0	0	0	0	0	0	0	0	0	0	0	0	0	0	0	0	0	0	0	0	0	0	0	0	0	0	0	0	0	0	0	0	0	0	0	0	0	0	0	0.01	0.01	0.08	0.02	0.12	0.03	0.15	0.04
603	0	0	0	0	0	0	0	0	0	0	0	0	0	0	0	0	0	0	0	0	0	0	0	0.09	0.01	0.18	0.02	0.25	0.03	0.31	0.04	0.35	0.04	0.39	0.05	0.43	0.06	0.45	0.07	0.48	0.08	0.49	0.09	0.5	0.1	0.51	0.11	0.52	0.12
604	0.04	0.01	0.04	0.02	0.04	0.03	0.04	0.04	0.05	0.05	0.05	0.06	0.06	0.08	0.07	0.1	0.07	0.11	0.08	0.13	0.09	0.14	0.09	0.46	0.1	0.47	0.11	0.48	0.12	0.48	0.13	0.49	0.13	0.49	0.14	0.49	0.15	0.49	0.16	0.49	0.17	0.49	0.18	0.48	0.19	0.47	0.2	0.46	0.21
605	0.05	0.03	0.05	0.06	0.05	0.08	0.05	0.11	0.06	0.13	0.06	0.18	0.07	0.23	0.08	0.27	0.08	0.31	0.09	0.34	0.1	0.37	0.1	0.04	0.11	0.04	0.12	0.04	0.13	0.04	0.14	0.04	0.14	0.04	0.15	0.04	0.16	0.04	0.17	0.04	0.18	0.04	0.19	0.04	0.2	0.04	0.21	0.04	0.22
606	0	0	0	0	0	0	0	0	0	0	0	0	0	0	0	0	0	0	0	0	0	0	0	0	0	0	0	0	0	0	0	0	0	0	0	0	0	0	0	0	0	0	0	0	0	0	0	0	0
701	0	0	0	0	0	0	0	0	0	0	0	0	0	0	0	0	0	0	0	0	0	0	0	0	0	0	0	0	0	0	0	0	0	0	0	0	0	0	0	0	0	0	0	0	0	0	0	0	0
702	0.16	0.02	0.16	0.03	0.16	0.03	0.16	0.04	0.16	0.05	0.16	0.07	0.16	0.09	0.16	0.1	0.16	0.12	0.16	0.14	0.17	0.15	0.17	0.1	0.17	0.11	0.17	0.12	0.18	0.13	0.18	0.14	0.18	0.15	0.19	0.15	0.19	0.16	0.19	0.17	0.2	0.18	0.2	0.18	0.21	0.19	0.21	0.2	0.22
703	0.2	0.02	0.2	0.03	0.2	0.04	0.2	0.05	0.2	0.06	0.2	0.08	0.2	0.1	0.2	0.12	0.2	0.14	0.2	0.16	0.21	0.18	0.21	0.13	0.21	0.14	0.21	0.15	0.22	0.16	0.22	0.17	0.22	0.18	0.23	0.19	0.23	0.2	0.23	0.21	0.24	0.22	0.24	0.23	0.25	0.23	0.25	0.24	0.26
704	0.26	0.01	0.26	0.01	0.26	0.01	0.26	0.02	0.26	0.02	0.26	0.03	0.26	0.03	0.26	0.04	0.26	0.05	0.26	0.05	0.27	0.06	0.27	0.01	0.27	0.01	0.27	0.01	0.28	0.01	0.28	0.01	0.28	0.01	0.29	0.01	0.29	0.01	0.29	0.01	0.3	0.01	0.3	0.01	0.31	0.01	0.31	0.01	0.32
705	0.28	0.01	0.28	0.01	0.28	0.01	0.28	0.01	0.28	0.02	0.28	0.02	0.28	0.03	0.28	0.03	0.28	0.04	0.28	0.04	0.29	0.05	0.29	0.23	0.29	0.25	0.29	0.27	0.3	0.29	0.3	0.3	0.3	0.32	0.31	0.34	0.31	0.35	0.31	0.37	0.32	0.38	0.32	0.39	0.33	0.4	0.33	0.42	0.34
706	0	0	0	0	0	0	0	0	0	0	0	0	0	0	0	0	0	0	0	0	0.01	0.01	0.01	0	0.01	0	0.01	0	0.02	0	0.02	0.01	0.02	0.01	0.03	0.01	0.03	0.01	0.03	0.01	0.04	0.01	0.04	0.01	0.05	0.01	0.05	0.01	0.06
707	0	0	0	0	0	0	0	0	0	0	0	0	0	0	0	0	0	0	0	0	0	0	0	0	0	0	0	0	0	0	0	0	0	0	0	0	0	0	0	0	0	0	0	0	0	0	0	0	0
801	0	0	0	0	0	0	0	0	0	0	0	0	0	0	0	0	0	0	0	0	0	0	0	0	0	0	0	0	0	0	0	0	0	0	0	0	0	0	0	0	0	0	0	0	0	0	0	0	0
802	0	0.04	0	0.07	0	0.1	0.01	0.13	0.01	0.17	0.01	0.22	0.02	0.28	0.02	0.32	0.03	0.37	0.03	0.4	0.04	0.44	0.04	0.66	0.05	0.7	0.05	0.73	0.06	0.77	0.06	0.8	0.07	0.83	0.07	0.85	0.08	0.88	0.08	0.91	0.09	0.93	0.09	0.95	0.1	0.97	0.1	0.99	0.11
803	0.02	0.09	0.02	0.12	0.02	0.16	0.03	0.19	0.03	0.21	0.03	0.26	0.04	0.29	0.04	0.32	0.05	0.35	0.05	0.37	0.06	0.39	0.06	0.23	0.07	0.24	0.07	0.25	0.08	0.26	0.08	0.26	0.09	0.27	0.09	0.28	0.1	0.28	0.1	0.29	0.11	0.29	0.11	0.3	0.12	0.3	0.12	0.31	0.13
804	0	0	0	0	0	0	0	0	0	0	0	0	0	0	0	0	0	0	0	0	0	0	0	0	0	0	0	0	0	0	0	0	0	0	0	0	0	0	0	0	0	0	0	0	0	0	0	0	0
901	0	0	0	0	0	0	0	0	0	0	0	0	0	0	0	0	0	0	0	0	0	0	0	0	0	0	0	0	0	0	0	0	0	0	0	0	0	0	0	0	0	0	0	0	0	0	0	0	0
902	0.06	0.03	0.06	0.05	0.06	0.06	0.07	0.08	0.07	0.1	0.07	0.13	0.08	0.15	0.08	0.18	0.08	0.2	0.09	0.22	0.09	0.24	0.1	0.29	0.1	0.31	0.11	0.32	0.11	0.33	0.12	0.34	0.13	0.35	0.13	0.36	0.14	0.36	0.14	0.37	0.15	0.37	0.16	0.38	0.16	0.38	0.17	0.38	0.17
903	0.09	0.04	0.09	0.06	0.09	0.08	0.1	0.1	0.1	0.12	0.1	0.15	0.11	0.19	0.11	0.21	0.11	0.24	0.12	0.26	0.12	0.28	0.13	0.17	0.13	0.18	0.14	0.18	0.14	0.19	0.15	0.19	0.16	0.2	0.16	0.2	0.17	0.2	0.17	0.21	0.18	0.21	0.19	0.21	0.19	0.21	0.2	0.21	0.2
904	0.04	0.04	0.04	0.05	0.04	0.07	0.05	0.09	0.05	0.11	0.05	0.15	0.06	0.18	0.06	0.22	0.06	0.25	0.07	0.27	0.07	0.3	0.08	0.56	0.08	0.59	0.09	0.62	0.09	0.65	0.1	0.67	0.11	0.69	0.11	0.71	0.12	0.72	0.12	0.74	0.13	0.75	0.14	0.76	0.14	0.77	0.15	0.77	0.15
905	0	0	0	0	0	0	0	0	0	0	0	0	0	0	0	0	0	0	0	0	0	0	0	0	0	0	0	0	0	0	0	0	0	0	0	0	0	0	0	0	0	0	0	0	0	0	0	0	0
906	0	0	0	0	0	0	0	0	0	0	0	0	0	0	0	0	0	0	0	0	0	0	0	0	0	0	0	0	0	0	0	0	0	0	0	0	0	0	0	0	0	0	0	0	0	0	0	0	0
1001	0	0	0	0	0	0	0	0	0	0	0	0	0	0	0	0	0	0	0	0	0	0	0	0	0	0	0	0	0	0	0	0	0	0	0	0	0	0	0	0	0	0	0	0	0	0	0	0	0
1002	0	0	0	0	0	0	0	0	0	0	0	0	0	0	0	0	0	0	0.01	0	0.02	0	0.02	0	0.03	0.01	0.04	0.01	0.05	0.01	0.06	0.01	0.07	0.02	0.08	0.02	0.09	0.02	0.1	0.02	0.12	0.03	0.13	0.03	0.14	0.03	0.16	0.04	0.17
1003	0.73	0	0.73	0	0.73	0	0.73	0.01	0.73	0.01	0.74	0.01	0.74	0.02	0.75	0.03	0.75	0.03	0.76	0.04	0.77	0.05	0.77	0.04	0.78	0.05	0.79	0.05	0.8	0.06	0.81	0.06	0.82	0.07	0.83	0.07	0.84	0.08	0.85	0.08	0.87	0.09	0.88	0.09	0.89	0.1	0.91	0.1	0.92
1004	0.23	0	0.23	0.01	0.23	0.01	0.23	0.02	0.23	0.03	0.24	0.05	0.24	0.07	0.25	0.09	0.25	0.12	0.26	0.15	0.27	0.18	0.27	0.24	0.28	0.27	0.29	0.31	0.3	0.35	0.31	0.38	0.32	0.42	0.33	0.46	0.34	0.5	0.35	0.54	0.37	0.57	0.38	0.61	0.39	0.64	0.41	0.67	0.42
1005	0	0	0	0	0	0	0	0	0	0	0	0	0	0	0	0	0	0	0	0	0	0	0	0	0	0	0	0	0	0	0	0	0	0	0	0	0	0	0	0	0	0	0	0	0	0	0	0	0
1101	0	0	0	0	0	0	0	0	0	0	0	0	0	0	0	0	0	0	0	0	0	0	0	0	0	0	0	0	0	0	0	0	0	0	0	0	0	0	0	0	0	0	0	0	0	0	0	0	0
1102	0	0	0	0	0	0	0	0	0	0	0	0	0	0	0	0	0	0	0	0	0	0	0.01	0.05	0.03	0.08	0.04	0.1	0.06	0.12	0.07	0.14	0.09	0.16	0.1	0.18	0.11	0.2	0.13	0.21	0.14	0.23	0.15	0.24	0.17	0.25	0.18	0.27	0.19
1103	0.04	0.1	0.05	0.19	0.06	0.2	0.07	0.21	0.08	0.19	0.1	0.2	0.12	0.21	0.14	0.23	0.15	0.24	0.17	0.26	0.19	0.28	0.2	0.33	0.22	0.34	0.23	0.35	0.25	0.36	0.26	0.37	0.28	0.39	0.29	0.4	0.3	0.41	0.32	0.43	0.33	0.44	0.34	0.45	0.36	0.46	0.37	0.48	0.38
1104	0	0	0	0	0	0	0	0.01	0.01	0.05	0.03	0.08	0.05	0.11	0.07	0.13	0.08	0.15	0.1	0.17	0.12	0.18	0.13	0.1	0.15	0.1	0.16	0.11	0.18	0.11	0.19	0.12	0.21	0.12	0.22	0.13	0.23	0.13	0.25	0.14	0.26	0.14	0.27	0.15	0.29	0.15	0.3	0.16	0.31
1105	0	0	0	0	0	0	0	0	0	0	0	0	0	0	0	0	0	0	0	0	0	0	0	0	0	0	0	0	0	0	0	0	0	0	0	0	0	0	0.01	0.01	0.02	0.03	0.03	0.04	0.05	0.05	0.06	0.05	0.07
1106	0	0	0	0	0	0	0	0	0	0	0	0	0	0	0	0	0	0	0	0	0	0	0	0	0	0	0	0	0	0	0	0	0	0	0	0	0	0	0	0	0	0	0	0	0	0	0	0	0
1201	0	0	0	0	0	0	0	0	0	0	0	0	0	0	0	0	0	0	0	0	0	0	0	0	0	0	0	0	0	0	0	0	0	0	0	0	0	0	0	0	0	0	0	0	0	0	0	0	0
1202	0	0	0	0	0	0	0	0	0	0	0	0	0	0	0	0	0	0	0	0	0	0	0	0	0	0	0	0	0	0	0	0	0	0	0	0	0	0	0	0	0	0	0	0	0	0	0	0	0
1203	0	0.02	0	0.03	0	0.05	0.01	0.05	0.01	0.06	0.01	0.06	0.02	0.07	0.03	0.08	0.04	0.08	0.05	0.09	0.06	0.09	0.07	0.24	0.09	0.25	0.1	0.26	0.11	0.27	0.13	0.28	0.15	0.29	0.16	0.3	0.18	0.3	0.2	0.31	0.22	0.32	0.24	0.32	0.26	0.33	0.28	0.33	0.31
1204	0	0.08	0	0.13	0	0.23	0.01	0.26	0.01	0.28	0.01	0.32	0.02	0.35	0.03	0.38	0.04	0.41	0.05	0.44	0.06	0.46	0.07	0.51	0.09	0.54	0.1	0.56	0.11	0.58	0.13	0.6	0.15	0.61	0.16	0.63	0.18	0.64	0.2	0.66	0.22	0.67	0.24	0.69	0.26	0.69	0.28	0.7	0.31
1205	0	0.06	0	0.09	0	0.16	0.01	0.18	0.01	0.19	0.01	0.22	0.02	0.25	0.03	0.27	0.04	0.29	0.05	0.31	0.06	0.32	0.07	0.17	0.09	0.17	0.1	0.18	0.11	0.19	0.13	0.19	0.15	0.2	0.16	0.2	0.18	0.21	0.2	0.21	0.22	0.22	0.24	0.22	0.26	0.22	0.28	0.23	0.31
1206	0	0	0	0	0	0	0	0	0	0	0	0	0	0	0	0	0	0	0	0	0	0	0	0	0	0	0	0	0	0	0	0	0	0	0	0	0	0	0	0	0	0	0	0.01	0.02	0.03	0.04	0.05	0.07
1207	0	0	0	0	0	0	0	0	0	0	0	0	0	0	0	0	0	0	0	0	0	0	0	0	0	0	0	0	0	0	0	0	0	0	0	0	0	0	0	0	0	0	0	0	0	0	0	0	0
1301	0	0	0	0	0	0	0	0	0	0	0	0	0	0	0	0	0	0	0	0	0	0	0	0	0	0	0	0	0	0	0	0	0	0	0	0	0	0	0	0	0	0	0	0	0	0	0	0	0
1302	0	0	0	0	0	0	0	0	0	0	0	0	0	0	0	0	0	0	0	0	0	0	0	0	0.01	0	0.03	0.01	0.05	0.01	0.06	0.01	0.08	0.01	0.1	0.01	0.12	0.01	0.13	0.01	0.15	0.01	0.16	0.02	0.18	0.02	0.2	0.02	0.21
1303	0.02	0	0.03	0.01	0.05	0.01	0.06	0.01	0.08	0.01	0.1	0.01	0.12	0.01	0.15	0.01	0.17	0.02	0.19	0.02	0.21	0.02	0.23	0.17	0.25	0.18	0.27	0.19	0.29	0.2	0.3	0.2	0.32	0.21	0.34	0.22	0.36	0.22	0.37	0.23	0.39	0.24	0.4	0.24	0.42	0.25	0.44	0.25	0.45
1304	0.05	0.12	0.06	0.14	0.08	0.16	0.09	0.18	0.11	0.19	0.13	0.23	0.15	0.26	0.18	0.29	0.2	0.32	0.22	0.35	0.24	0.38	0.26	0.14	0.28	0.15	0.3	0.15	0.32	0.16	0.33	0.16	0.35	0.17	0.37	0.17	0.39	0.18	0.4	0.18	0.42	0.19	0.43	0.19	0.45	0.2	0.47	0.2	0.48
1305	0	0	0	0	0	0	0.01	0.01	0.03	0.02	0.05	0.03	0.07	0.03	0.1	0.04	0.12	0.05	0.14	0.06	0.16	0.06	0.18	0.34	0.2	0.36	0.22	0.38	0.24	0.4	0.25	0.42	0.27	0.44	0.29	0.45	0.31	0.47	0.32	0.48	0.34	0.5	0.35	0.51	0.37	0.53	0.39	0.54	0.4
1306	0	0	0	0	0	0	0	0	0	0	0	0	0	0	0	0	0	0	0	0	0	0	0	0	0	0	0	0	0	0	0	0	0	0	0	0	0	0	0	0	0	0	0	0	0	0	0	0	0
1307	0	0	0	0	0	0	0	0	0	0	0	0	0	0	0	0	0	0	0	0	0	0	0	0	0	0	0	0	0	0	0	0	0	0	0	0	0	0	0	0	0	0	0	0	0	0	0	0	0
1401	0	0	0	0	0	0	0	0	0	0	0	0	0	0	0	0	0	0	0	0	0	0	0	0	0	0	0	0	0	0	0	0	0	0	0	0	0	0	0	0	0	0	0	0	0	0	0	0	0
1402	0	0	0	0	0	0	0	0	0	0	0	0	0	0	0.01	0.06	0.01	0.1	0.02	0.14	0.02	0.17	0.03	0.32	0.04	0.36	0.04	0.39	0.05	0.42	0.05	0.45	0.06	0.47	0.07	0.49	0.07	0.51	0.08	0.53	0.09	0.54	0.09	0.54	0.1	0.55	0.11	0.56	0.11
1403	0.06	0.08	0.06	0.12	0.06	0.16	0.06	0.19	0.07	0.23	0.07	0.29	0.08	0.34	0.09	0.38	0.09	0.42	0.1	0.45	0.1	0.47	0.11	0.45	0.12	0.46	0.12	0.47	0.13	0.47	0.13	0.47	0.14	0.48	0.15	0.48	0.15	0.48	0.16	0.48	0.17	0.48	0.17	0.48	0.18	0.47	0.19	0.47	0.19
1404	0.11	0.07	0.11	0.1	0.11	0.13	0.11	0.16	0.12	0.19	0.12	0.23	0.13	0.27	0.14	0.3	0.14	0.32	0.15	0.34	0.15	0.36	0.16	0.08	0.17	0.08	0.17	0.08	0.18	0.08	0.18	0.08	0.19	0.08	0.2	0.08	0.2	0.08	0.21	0.08	0.22	0.08	0.22	0.08	0.23	0.08	0.24	0.08	0.24
1405	0.01	0	0.01	0.01	0.01	0.01	0.01	0.01	0.02	0.02	0.02	0.03	0.03	0.04	0.04	0.04	0.04	0.05	0.05	0.06	0.05	0.06	0.06	0.51	0.07	0.53	0.07	0.55	0.08	0.57	0.08	0.59	0.09	0.6	0.1	0.61	0.1	0.63	0.11	0.64	0.12	0.64	0.12	0.64	0.13	0.64	0.14	0.65	0.14
1406	0	0	0	0	0	0	0	0	0	0	0	0	0	0	0	0	0	0	0	0	0	0	0	0	0	0	0	0	0	0	0	0	0	0	0	0	0	0	0	0	0	0.03	0	0.1	0.01	0.14	0.02	0.18	0.02
1407	0	0	0	0	0	0	0	0	0	0	0	0	0	0	0	0	0	0	0	0	0	0	0	0	0	0	0	0	0	0	0	0	0	0	0	0	0	0	0	0	0	0	0	0	0	0	0	0	0
1501	0	0	0	0	0	0	0	0	0	0	0	0	0	0	0	0	0	0	0	0	0	0	0	0	0	0	0	0	0	0	0	0	0	0	0	0	0	0	0	0	0	0	0	0	0	0	0	0	0
1502	0	0.03	0.01	0.05	0.01	0.07	0.01	0.14	0.02	0.11	0.03	0.11	0.04	0.11	0.06	0.12	0.07	0.12	0.09	0.13	0.11	0.14	0.13	0.12	0.15	0.13	0.18	0.13	0.2	0.14	0.23	0.14	0.25	0.14	0.28	0.15	0.31	0.15	0.34	0.15	0.38	0.16	0.41	0.16	0.44	0.16	0.48	0.16	0.52
1503	0	0	0	0	0	0	0	0.11	0.01	0.14	0.02	0.17	0.03	0.19	0.05	0.21	0.06	0.24	0.08	0.26	0.1	0.27	0.12	0.31	0.14	0.33	0.17	0.35	0.19	0.36	0.22	0.37	0.24	0.38	0.27	0.39	0.3	0.4	0.33	0.41	0.37	0.42	0.4	0.43	0.43	0.43	0.47	0.43	0.51
1504	0	0	0	0	0	0	0	0	0	0	0	0	0	0	0	0	0	0	0	0	0	0	0	0	0	0	0	0	0	0	0	0	0	0	0	0	0	0	0	0	0	0	0	0	0.02	0.02	0.06	0.04	0.1
1505	0	0	0	0	0	0	0	0	0	0	0	0	0	0	0	0	0	0	0	0	0	0	0	0	0	0	0	0	0	0	0	0	0	0	0	0	0	0	0	0	0	0	0	0	0	0	0	0	0
1506	0	0	0	0	0	0	0	0	0	0	0	0	0	0	0	0	0	0	0	0	0	0	0	0	0	0	0	0	0	0	0	0	0	0	0	0	0	0	0	0	0	0	0	0	0	0	0	0	0
1601	0	0	0	0	0	0	0	0	0	0	0	0	0	0	0	0	0	0	0	0	0	0	0	0	0	0	0	0	0	0	0	0	0	0	0	0	0	0	0	0	0	0	0	0	0	0	0	0	0
1602	0	0	0	0	0	0	0	0	0	0	0	0	0	0	0	0	0	0	0	0	0	0	0	0	0	0	0	0	0	0	0	0	0	0	0	0	0	0	0	0	0	0	0	0	0	0	0	0	0
1603	0.02	0.79	0.02	0.05	0.02	0.08	0.03	0.1	0.03	0.13	0.03	0.17	0.04	0.2	0.04	0.22	0.05	0.24	0.06	0.26	0.06	0.27	0.07	0.28	0.08	0.29	0.09	0.3	0.1	0.31	0.1	0.31	0.11	0.32	0.12	0.32	0.13	0.32	0.14	0.33	0.15	0.33	0.16	0.33	0.18	0.33	0.19	0.33	0.2
1604	0.01	0.69	0.01	0.05	0.01	0.07	0.02	0.1	0.02	0.12	0.02	0.17	0.03	0.21	0.03	0.25	0.04	0.28	0.05	0.3	0.05	0.32	0.06	0.34	0.07	0.36	0.08	0.37	0.09	0.38	0.09	0.39	0.1	0.4	0.11	0.41	0.12	0.42	0.13	0.42	0.14	0.43	0.15	0.43	0.17	0.43	0.18	0.43	0.19
1605	0	0	0	0	0	0	0	0	0	0	0	0	0	0	0	0	0	0	0	0	0	0	0	0	0	0	0	0	0	0	0	0	0	0	0	0	0	0	0	0	0	0	0	0	0	0	0	0	0
1701	0	0	0	0	0	0	0	0	0	0	0	0	0	0	0	0	0	0	0	0	0	0	0	0	0	0	0	0	0	0	0	0	0	0	0	0	0	0	0	0	0	0	0	0	0	0	0	0	0
1702	0	0	0	0	0	0	0	0	0	0	0	0	0	0	0	0	0	0	0	0	0	0	0	0	0	0	0	0	0	0	0	0	0	0	0	0	0	0	0	0	0	0	0	0	0	0	0.01	0.03	0.04
1703	0	0.01	0	0.02	0	0.03	0.01	0.04	0.01	0.04	0.02	0.05	0.02	0.07	0.03	0.08	0.04	0.09	0.05	0.11	0.06	0.12	0.08	0.34	0.09	0.37	0.11	0.39	0.12	0.41	0.14	0.43	0.16	0.45	0.18	0.46	0.2	0.48	0.22	0.49	0.24	0.5	0.26	0.51	0.29	0.52	0.31	0.52	0.34
1704	0	0.03	0	0.04	0	0.06	0.01	0.08	0.01	0.09	0.02	0.12	0.02	0.15	0.03	0.18	0.04	0.21	0.05	0.23	0.06	0.26	0.08	0.04	0.09	0.04	0.11	0.05	0.12	0.05	0.14	0.05	0.16	0.05	0.18	0.06	0.2	0.06	0.22	0.06	0.24	0.06	0.26	0.06	0.29	0.06	0.31	0.06	0.34
1705	0	0	0	0	0	0	0	0	0	0	0	0	0	0	0	0	0	0	0	0	0	0	0	0	0	0	0	0	0	0	0	0	0	0	0	0	0	0	0	0	0	0	0	0	0	0	0	0	0
1801	0	0	0	0	0	0	0	0	0	0	0	0	0	0	0	0	0	0	0	0	0	0	0	0	0	0	0	0	0	0	0	0	0	0	0	0	0	0	0	0	0	0	0	0	0	0	0	0	0
1802	0	0	0	0	0	0	0	0	0	0	0	0	0	0	0	0	0	0	0	0	0	0	0	0	0	0	0	0	0	0	0	0	0	0	0	0	0	0	0	0	0.01	0.42	0.04	0.67	0.06	0.81	0.08	0.92	0.11
1803	0.01	0.06	0.02	0.09	0.03	0.11	0.04	0.14	0.05	0.16	0.06	0.2	0.08	0.23	0.1	0.26	0.12	0.29	0.14	0.32	0.16	0.35	0.18	0.22	0.21	0.24	0.23	0.25	0.25	0.26	0.27	0.28	0.29	0.29	0.32	0.3	0.34	0.31	0.36	0.32	0.38	0.26	0.41	0.23	0.43	0.21	0.45	0.19	0.48
1804	0.01	0.03	0.02	0.03	0.03	0.04	0.04	0.05	0.05	0.06	0.06	0.08	0.08	0.09	0.1	0.1	0.12	0.11	0.14	0.12	0.16	0.14	0.18	0.31	0.21	0.33	0.23	0.35	0.25	0.37	0.27	0.38	0.29	0.4	0.32	0.41	0.34	0.43	0.36	0.44	0.38	0.36	0.41	0.31	0.43	0.28	0.45	0.27	0.48
1805	0	0	0	0	0	0	0	0	0	0	0	0	0	0	0	0	0	0	0	0	0	0	0	0	0	0	0	0	0	0	0	0	0	0	0	0	0	0	0	0	0	0	0	0	0	0	0	0	0
1806	0	0	0	0	0	0	0	0	0	0	0	0	0	0	0	0	0	0	0	0	0	0	0	0	0	0	0	0	0	0	0	0	0	0	0	0	0	0	0	0	0	0	0	0	0	0	0	0	0
1901	0	0	0	0	0	0	0	0	0	0	0	0	0	0	0	0	0	0	0	0	0	0	0	0	0	0	0	0	0	0	0	0	0	0	0	0	0	0	0	0	0	0	0	0	0	0	0	0	0
1902	0	0	0	0	0	0	0	0	0	0	0	0	0	0	0	0	0	0	0	0	0	0	0	0	0	0	0	0	0.01	0.01	0.02	0.03	0.04	0.03	0.05	0.03	0.07	0.04	0.08	0.04	0.1	0.05	0.12	0.06	0.14	0.06	0.16	0.07	0.18
1903	0	0	0	0	0	0	0	0	0	0	0	0	0	0	0	0	0	0	0	0	0	0	0	0	0	0	0	0	0	0	0.01	0.12	0.03	0.18	0.04	0.23	0.06	0.27	0.07	0.31	0.09	0.35	0.11	0.4	0.13	0.45	0.15	0.51	0.17
1904	0	0.01	0	0.02	0	0.03	0.01	0.04	0.01	0.05	0.01	0.06	0.02	0.08	0.03	0.1	0.04	0.12	0.05	0.18	0.06	0.22	0.07	0.25	0.08	0.28	0.09	0.32	0.11	0.35	0.12	0.29	0.14	0.26	0.15	0.25	0.17	0.25	0.18	0.26	0.2	0.28	0.22	0.3	0.24	0.32	0.26	0.34	0.28
1905	0	0	0	0	0	0	0	0	0	0	0	0	0	0	0	0	0	0	0	0	0	0	0	0	0	0	0	0	0	0	0.01	0	0.03	0.01	0.04	0.01	0.06	0.01	0.07	0.01	0.09	0.01	0.11	0.01	0.13	0.02	0.15	0.02	0.17
1906	0	0	0	0	0	0	0	0	0	0	0	0	0	0	0	0	0	0	0	0	0	0	0	0	0	0	0	0	0	0	0.01	0	0.03	0.01	0.04	0.01	0.06	0.01	0.07	0.01	0.09	0.01	0.11	0.01	0.13	0.02	0.15	0.02	0.17
1907	0	0	0	0	0	0	0	0	0	0	0	0	0	0	0	0	0	0	0	0	0	0	0	0	0	0	0	0	0	0	0	0	0	0	0	0	0	0	0	0	0	0	0	0	0	0	0	0	0
2001	0	0	0	0	0	0	0	0	0	0	0	0	0	0	0	0	0	0	0	0	0	0	0	0	0	0	0	0	0	0	0	0	0	0	0	0	0	0	0	0	0	0	0	0	0	0	0	0	0
2002	0.73	0.05	0.76	0.08	0.79	0.1	0.82	0.13	0.84	0.15	0.88	0.03	0.91	0.03	0.95	0.03	0.98	0.03	1	0.03	1.03	0.03	1.05	0.33	1.07	0.35	1.1	0.37	1.12	0.39	1.14	0.4	1.16	0.42	1.18	0.44	1.19	0.45	1.21	0.47	1.23	0.46	1.25	0.42	1.26	0.39	1.28	0.36	1.29
2003	0	0	0	0	0	0	0	0	0	0	0.04	0.21	0.07	0.26	0.11	0.31	0.14	0.35	0.16	0.39	0.19	0.42	0.21	0.1	0.23	0.11	0.26	0.12	0.28	0.13	0.3	0.14	0.32	0.16	0.34	0.17	0.35	0.18	0.37	0.19	0.39	0.19	0.41	0.17	0.42	0.16	0.44	0.16	0.45
2004	0	0	0	0	0	0	0	0	0	0	0	0	0	0	0	0	0	0	0	0	0	0	0	0	0	0	0	0	0	0	0	0	0	0	0	0	0	0	0	0	0	0.15	0.02	0.45	0.03	0.61	0.05	0.72	0.06
2005	0	0	0	0	0	0	0	0	0	0	0	0	0	0	0	0	0	0	0	0	0	0	0	0	0	0	0	0	0	0	0	0	0	0	0	0	0	0	0	0	0	0.15	0.02	0.45	0.03	0.61	0.05	0.72	0.06
2006	0	0	0	0	0	0	0	0	0	0	0	0	0	0	0	0	0	0	0	0	0	0	0	0	0	0	0	0	0	0	0	0	0	0	0	0	0	0	0	0	0	0	0	0	0	0	0	0	0
2101	0	0	0	0	0	0	0	0	0	0	0	0	0	0	0	0	0	0	0	0	0	0	0	0	0	0	0	0	0	0	0	0	0	0	0	0	0	0	0	0	0	0	0	0	0	0	0	0	0
2102	0	0	0	0	0	0	0	0	0	0	0	0	0	0	0	0	0	0	0	0	0	0	0	0	0	0	0	0	0	0	0	0	0	0	0	0	0	0	0.01	0.02	0.03	0.06	0.05	0.08	0.07	0.1	0.1	0.12	0.12
2103	0.03	0.06	0.05	0.08	0.06	0.09	0.07	0.1	0.09	0.12	0.11	0.14	0.14	0.16	0.16	0.18	0.19	0.2	0.21	0.22	0.23	0.24	0.26	0.26	0.28	0.27	0.3	0.29	0.33	0.31	0.35	0.32	0.37	0.33	0.39	0.34	0.42	0.35	0.44	0.35	0.46	0.35	0.48	0.35	0.5	0.36	0.53	0.37	0.55
2104	0	0	0	0	0	0	0	0	0	0	0	0	0	0	0	0	0	0	0	0	0	0	0	0	0	0	0	0	0	0	0	0	0	0.01	0.02	0.02	0.05	0.03	0.07	0.04	0.09	0.05	0.11	0.06	0.13	0.06	0.16	0.07	0.18
2105	0	0	0	0	0	0	0	0	0	0	0	0	0	0	0	0	0	0	0	0	0	0	0	0	0	0	0	0	0	0	0	0	0	0	0	0	0	0	0	0	0	0	0	0	0	0	0	0	0
2201	0	0	0	0	0	0	0	0	0	0	0	0	0	0	0	0	0	0	0	0	0	0	0	0	0	0	0	0	0	0	0	0	0	0	0	0	0	0	0	0	0	0	0	0	0	0	0	0	0
2202	0	0.01	0.01	0.01	0.02	0.01	0.03	0.01	0.04	0.01	0.05	0.01	0.07	0.01	0.09	0.01	0.11	0.01	0.13	0.01	0.14	0.01	0.16	0.02	0.18	0.02	0.2	0.02	0.22	0.02	0.24	0.02	0.26	0.02	0.28	0.02	0.3	0.02	0.32	0.02	0.34	0.02	0.36	0.02	0.38	0.02	0.4	0.02	0.42
2203	0	0.15	0.01	0.17	0.02	0.19	0.03	0.2	0.04	0.21	0.05	0.24	0.07	0.26	0.09	0.28	0.11	0.3	0.13	0.31	0.14	0.33	0.16	0.33	0.18	0.34	0.2	0.35	0.22	0.37	0.24	0.38	0.26	0.39	0.28	0.4	0.3	0.41	0.32	0.42	0.34	0.43	0.36	0.44	0.38	0.44	0.4	0.45	0.42
2204	0.01	0.18	0.02	0.13	0.03	0.13	0.04	0.13	0.05	0.13	0.06	0.14	0.08	0.15	0.1	0.15	0.12	0.16	0.14	0.17	0.15	0.18	0.17	0.21	0.19	0.22	0.21	0.22	0.23	0.23	0.25	0.24	0.27	0.24	0.29	0.25	0.31	0.25	0.33	0.26	0.35	0.27	0.37	0.27	0.39	0.28	0.41	0.28	0.43
2205	0	0	0	0	0	0	0	0	0	0	0	0	0	0	0	0	0	0	0	0	0	0	0	0	0	0	0	0	0	0	0	0	0	0	0	0	0.01	0	0.03	0.01	0.05	0.01	0.07	0.01	0.09	0.02	0.11	0.02	0.13
2206	0	0	0	0	0	0	0	0	0	0	0	0	0	0	0	0	0	0	0	0	0	0	0	0	0	0	0	0	0	0	0	0	0	0	0	0	0	0	0	0	0	0	0	0	0	0	0	0	0
2301	0	0	0	0	0	0	0	0	0	0	0	0	0	0	0	0	0	0	0	0	0	0	0	0	0	0	0	0	0	0	0	0	0	0	0	0	0	0	0	0	0	0	0	0	0	0	0	0	0
2302	0	0	0	0	0	0	0	0	0	0	0	0	0	0	0	0	0	0	0	0	0	0	0	0	0	0	0	0	0	0	0	0	0	0	0	0	0	0	0	0	0	0	0	0	0	0	0	0	0
2303	0	0	0	0	0	0	0.01	0.18	0.02	0.06	0.03	0.04	0.05	0.04	0.07	0.04	0.09	0.04	0.11	0.04	0.13	0.04	0.15	0.11	0.17	0.11	0.19	0.11	0.21	0.12	0.23	0.12	0.25	0.13	0.27	0.13	0.29	0.13	0.31	0.13	0.33	0.14	0.36	0.14	0.38	0.14	0.4	0.14	0.42
2304	0	0	0	0	0	0	0	0	0.01	0.37	0.02	0.36	0.04	0.37	0.06	0.38	0.08	0.4	0.1	0.43	0.12	0.45	0.14	0.11	0.16	0.12	0.18	0.12	0.2	0.13	0.22	0.13	0.24	0.13	0.26	0.14	0.28	0.14	0.3	0.14	0.32	0.15	0.35	0.15	0.37	0.15	0.39	0.16	0.41
2305	0.01	0.05	0.02	0.07	0.03	0.09	0.04	0.76	0.05	0.18	0.06	0.09	0.08	0.07	0.1	0.06	0.12	0.06	0.14	0.06	0.16	0.07	0.18	0.64	0.2	0.66	0.22	0.68	0.24	0.7	0.26	0.71	0.28	0.73	0.3	0.74	0.32	0.76	0.34	0.77	0.36	0.79	0.39	0.8	0.41	0.81	0.43	0.82	0.45
2306	0	0	0	0	0	0	0	0	0	0	0	0	0	0	0	0	0	0	0	0	0	0	0	0	0	0	0	0	0	0	0	0	0	0	0	0	0	0	0	0	0	0	0	0	0	0	0	0	0.01
2307	0	0	0	0	0	0	0	0	0	0	0	0	0	0	0	0	0	0	0	0	0	0	0	0	0	0	0	0	0	0	0	0	0	0	0	0	0	0	0	0	0	0	0	0	0	0	0	0	0
2401	0	0	0	0	0	0	0	0	0	0	0	0	0	0	0	0	0	0	0	0	0	0	0	0	0	0	0	0	0	0	0	0	0	0	0	0	0	0	0	0	0	0	0	0	0	0	0	0	0
2402	0	0	0	0	0	0	0	0	0	0	0	0	0	0	0	0	0	0	0	0	0	0	0	0	0	0	0	0	0	0	0	0	0	0	0	0	0	0	0	0.01	0.02	0.03	0.04	0.04	0.05	0.04	0.07	0.05	0.09
2403	0	0	0	0	0	0	0	0.01	0.01	0.02	0.02	0.04	0.03	0.05	0.04	0.05	0.06	0.06	0.07	0.06	0.08	0.07	0.1	0.34	0.11	0.35	0.13	0.36	0.14	0.37	0.16	0.37	0.17	0.37	0.19	0.23	0.21	0.19	0.22	0.16	0.24	0.15	0.26	0.13	0.27	0.12	0.29	0.12	0.31
2404	0.01	0.07	0.01	0.13	0.02	0.15	0.02	0.15	0.03	0.16	0.04	0.17	0.05	0.19	0.06	0.2	0.08	0.21	0.09	0.22	0.1	0.23	0.12	0.08	0.13	0.08	0.15	0.08	0.16	0.08	0.18	0.08	0.19	0.08	0.21	0.05	0.23	0.04	0.24	0.03	0.26	0.03	0.28	0.03	0.29	0.03	0.31	0.02	0.33
2405	0.01	0.01	0.01	0.02	0.02	0.02	0.02	0.03	0.03	0.03	0.04	0.03	0.05	0.03	0.06	0.03	0.08	0.03	0.09	0.04	0.1	0.04	0.12	0.08	0.13	0.08	0.15	0.08	0.16	0.08	0.18	0.08	0.19	0.08	0.21	0.05	0.23	0.04	0.24	0.03	0.26	0.03	0.28	0.03	0.29	0.03	0.31	0.02	0.33
2406	0	0	0	0	0	0	0	0	0	0	0	0	0	0	0	0	0	0	0	0	0	0	0	0	0	0	0	0	0	0	0	0	0	0	0.01	1.01	0.03	1.28	0.04	1.4	0.06	1.45	0.08	1.49	0.09	1.51	0.11	1.52	0.13
2407	0	0	0	0	0	0	0	0	0	0	0	0	0	0	0	0	0	0	0	0	0	0	0	0	0	0	0	0	0	0	0	0	0	0	0	0	0	0	0	0	0	0	0	0	0	0	0	0	0
2501	0	0	0	0	0	0	0	0	0	0	0	0	0	0	0	0	0	0	0	0	0	0	0	0	0	0	0	0	0	0	0	0	0	0	0	0	0	0	0	0	0	0	0	0	0	0	0	0	0
2502	0	0	0	0	0	0	0	0	0	0	0	0	0	0	0	0	0	0	0	0	0	0	0	0	0	0	0	0	0	0	0	0	0	0	0	0	0	0	0	0	0	0	0	0	0	0	0	0	0.01
2503	0.01	0.02	0.01	0.04	0.02	0.04	0.03	0.05	0.03	0.06	0.05	0.07	0.07	0.07	0.09	0.08	0.11	0.09	0.13	0.09	0.15	0.1	0.17	0.22	0.19	0.22	0.21	0.23	0.24	0.23	0.26	0.24	0.28	0.24	0.31	0.24	0.34	0.25	0.36	0.25	0.39	0.25	0.41	0.25	0.44	0.25	0.47	0.25	0.5
2504	0.01	0.07	0.01	0.12	0.02	0.15	0.03	0.17	0.03	0.19	0.05	0.23	0.07	0.26	0.09	0.29	0.11	0.31	0.13	0.33	0.15	0.35	0.17	0.22	0.19	0.22	0.21	0.23	0.24	0.23	0.26	0.24	0.28	0.24	0.31	0.24	0.34	0.25	0.36	0.25	0.39	0.25	0.41	0.25	0.44	0.25	0.47	0.25	0.5
2505	0	0	0	0	0	0	0	0	0	0	0	0	0	0	0	0	0	0	0	0	0	0	0	0	0	0	0	0	0	0	0	0	0	0	0	0	0	0	0	0	0	0	0	0	0	0	0	0	0
2506	0	0	0	0	0	0	0	0	0	0	0	0	0	0	0	0	0	0	0	0	0	0	0	0	0	0	0	0	0	0	0	0	0	0	0	0	0	0	0	0	0	0	0	0	0	0	0	0	0
2601	0	0	0	0	0	0	0	0	0	0	0	0	0	0	0	0	0	0	0	0	0	0	0	0	0	0	0	0	0	0	0	0	0	0	0	0	0	0	0	0	0	0	0	0	0	0	0	0	0
2602	0	0	0	0	0	0	0	0	0	0	0	0	0	0	0	0	0	0	0	0	0	0	0	0	0	0	0	0	0	0	0	0	0	0	0	0	0	0	0	0	0	0	0	0	0	0	0	0.02	0.03
2603	0	0.02	0	0.03	0	0.04	0.01	0.07	0.01	0.08	0.01	0.08	0.02	0.09	0.03	0.1	0.04	0.1	0.05	0.11	0.06	0.11	0.08	0.3	0.09	0.31	0.11	0.31	0.12	0.32	0.14	0.32	0.16	0.32	0.18	0.32	0.21	0.33	0.23	0.33	0.25	0.32	0.28	0.32	0.3	0.32	0.33	0.31	0.36
2604	0	0.06	0	0.11	0	0.15	0.01	0.25	0.01	0.27	0.01	0.31	0.02	0.33	0.03	0.36	0.04	0.38	0.05	0.4	0.06	0.41	0.08	0.22	0.09	0.22	0.11	0.23	0.12	0.23	0.14	0.23	0.16	0.23	0.18	0.23	0.21	0.23	0.23	0.23	0.25	0.23	0.28	0.23	0.3	0.23	0.33	0.23	0.36
2605	0	0	0	0	0	0	0	0	0	0	0	0	0	0	0	0	0	0	0	0	0	0	0	0	0	0	0	0	0	0	0	0	0	0	0	0	0	0	0	0	0	0	0	0	0	0	0	0	0
2701	0	0	0	0	0	0	0	0	0	0	0	0	0	0	0	0	0	0	0	0	0	0	0	0	0	0	0	0	0	0	0	0	0	0	0	0	0	0	0	0	0	0	0	0	0	0	0	0	0
2702	0	0	0	0	0	0	0	0	0	0	0	0	0	0	0	0	0	0	0	0	0	0	0	0	0	0	0	0	0	0	0	0	0.01	0.04	0.03	0.07	0.05	0.09	0.06	0.11	0.08	0.12	0.1	0.13	0.12	0.13	0.14	0.14	0.16
2703	0.02	0.12	0.03	0.12	0.04	0.12	0.05	0.12	0.07	0.12	0.09	0.13	0.11	0.13	0.13	0.13	0.15	0.13	0.17	0.14	0.19	0.14	0.21	0.38	0.23	0.38	0.25	0.38	0.27	0.37	0.29	0.37	0.31	0.36	0.33	0.35	0.35	0.34	0.36	0.33	0.38	0.32	0.4	0.3	0.42	0.29	0.44	0.29	0.46
2704	0.01	0.34	0.02	0.38	0.03	0.41	0.04	0.43	0.06	0.45	0.08	0.49	0.1	0.51	0.12	0.52	0.14	0.54	0.16	0.54	0.18	0.55	0.2	0.27	0.22	0.27	0.24	0.27	0.26	0.27	0.28	0.27	0.3	0.26	0.32	0.25	0.34	0.25	0.35	0.24	0.37	0.24	0.39	0.22	0.41	0.22	0.43	0.21	0.45
2705	0	0	0	0	0	0	0	0	0	0	0	0	0	0	0	0	0	0	0	0	0	0	0	0	0	0	0	0	0	0	0	0	0	0	0	0	0	0	0	0	0	0.03	0.02	0.08	0.04	0.11	0.06	0.13	0.08
2706	0	0	0	0	0	0	0	0	0	0	0	0	0	0	0	0	0	0	0	0	0	0	0	0	0	0	0	0	0	0	0	0	0	0	0	0	0	0	0	0	0	0	0	0	0	0	0	0	0
2801	0	0	0	0	0	0	0	0	0	0	0	0	0	0	0	0	0	0	0	0	0	0	0	0	0	0	0	0	0	0	0	0	0	0	0	0	0	0	0	0	0	0	0	0	0	0	0	0	0
2802	0	0	0	0	0	0	0	0	0	0	0	0	0	0	0	0	0	0	0	0	0	0	0	0	0	0	0	0	0	0	0	0	0.02	0.06	0.04	0.1	0.06	0.12	0.08	0.14	0.1	0.16	0.12	0.17	0.14	0.18	0.16	0.19	0.18
2803	0	0	0	0	0	0	0	0.21	0.01	0.49	0.02	0.5	0.04	0.51	0.05	0.52	0.07	0.53	0.09	0.54	0.11	0.55	0.12	0.31	0.14	0.32	0.16	0.33	0.18	0.33	0.2	0.34	0.22	0.33	0.24	0.33	0.26	0.33	0.28	0.33	0.3	0.33	0.32	0.33	0.34	0.33	0.36	0.34	0.38
2804	0.01	0.04	0.02	0.05	0.02	0.06	0.03	0.43	0.04	0.11	0.05	0.07	0.07	0.06	0.08	0.05	0.1	0.05	0.12	0.05	0.14	0.05	0.15	0.3	0.17	0.3	0.19	0.31	0.21	0.31	0.23	0.31	0.25	0.3	0.27	0.3	0.29	0.3	0.31	0.3	0.33	0.29	0.35	0.29	0.37	0.29	0.39	0.29	0.41
2805	0	0	0	0	0	0	0	0	0	0	0	0	0	0	0	0	0	0	0	0	0	0	0	0	0	0	0	0	0	0	0	0	0	0	0	0	0	0	0	0	0	0	0	0	0	0	0	0	0.01
2806	0	0	0	0	0	0	0	0	0	0	0	0	0	0	0	0	0	0	0	0	0	0	0	0	0	0	0	0	0	0	0	0	0	0	0	0	0	0	0	0	0	0	0	0	0	0	0	0	0
2901	0	0	0	0	0	0	0	0	0	0	0	0	0	0	0	0	0	0	0	0	0	0	0	0	0	0	0	0	0	0	0	0	0	0	0	0	0	0	0	0	0	0	0	0	0	0	0	0	0
2902	0	0	0	0	0	0	0	0	0	0	0	0	0	0	0	0	0	0	0	0	0.01	0.07	0.03	0.11	0.05	0.14	0.07	0.16	0.09	0.19	0.12	0.21	0.14	0.24	0.16	0.26	0.19	0.25	0.22	0.25	0.24	0.26	0.27	0.26	0.3	0.27	0.33	0.27	0.36
2903	0	0.06	0.01	0.09	0.01	0.12	0.01	0.15	0.02	0.18	0.03	0.24	0.04	0.24	0.05	0.25	0.07	0.26	0.09	0.28	0.1	0.24	0.12	0.25	0.14	0.26	0.16	0.27	0.18	0.29	0.21	0.31	0.23	0.33	0.25	0.34	0.28	0.32	0.31	0.32	0.33	0.32	0.36	0.32	0.39	0.32	0.42	0.32	0.45
2904	0	0	0	0	0	0	0	0	0	0	0	0	0	0	0	0	0	0	0	0	0	0	0	0	0	0	0	0	0	0	0	0	0	0	0	0.03	0.03	0.14	0.06	0.21	0.08	0.26	0.11	0.3	0.14	0.33	0.17	0.36	0.2
2905	0	0	0	0	0	0	0	0	0	0	0	0	0	0	0	0	0	0	0	0	0	0	0	0	0	0	0	0	0	0	0	0	0	0	0	0	0	0	0	0	0	0	0	0	0	0	0	0	0.01
2906	0	0	0	0	0	0	0	0	0	0	0	0	0	0	0	0	0	0	0	0	0	0	0	0	0	0	0	0	0	0	0	0	0	0	0	0	0	0	0	0	0	0	0	0	0	0	0	0	0
3001	0	0	0	0	0	0	0	0	0	0	0	0	0	0	0	0	0	0	0	0	0	0	0	0	0	0	0	0	0	0	0	0	0	0	0	0	0	0	0	0	0	0	0	0	0	0	0	0	0
3002	0	0	0	0	0	0	0	0	0	0	0	0	0	0	0	0	0	0	0	0	0	0	0	0	0	0	0	0	0	0	0	0	0	0	0	0	0	0	0	0	0	0	0	0	0.01	0.37	0.04	0.66	0.08
3003	0	0.05	0	0.09	0	0.13	0.01	0.17	0.01	0.22	0.02	0.32	0.02	0.42	0.03	41.44	0.04	0.37	0.06	0.4	0.07	0.43	0.09	0.04	0.11	0.49	0.13	0.51	0.15	0.54	0.17	0.56	0.19	0.59	0.22	0.61	0.24	0.63	0.27	0.65	0.3	0.68	0.33	0.7	0.37	0.52	0.4	0.39	0.44
3004	0	0	0	0	0	0	0	0	0	0	0	0	0	0	0	0	0	0	0	0	0	0	0	0	0	0	0	0	0	0	0	0	0	0	0	0	0	0	0	0	0	0	0	0	0	0	0	0	0
3005	0	0	0	0	0	0	0	0	0	0	0	0	0	0	0	0	0	0	0	0	0	0	0	0	0	0	0	0	0	0	0	0	0	0	0	0	0	0	0	0	0	0	0	0	0	0	0	0	0
3101	0	0	0	0	0	0	0	0	0	0	0	0	0	0	0	0	0	0	0	0	0	0	0	0	0	0	0	0	0	0	0	0	0	0	0	0	0	0	0	0	0	0	0	0	0	0	0	0	0
3102	0	0	0	0	0	0	0	0	0	0	0	0	0	0	0	0	0	0	0	0	0	0	0	0	0	0	0	0	0	0	0	0	0	0	0	0	0	0	0	0	0	0	0.03	0.03	0.06	0.05	0.09	0.07	0.12
3103	0.04	0.02	0.05	0.02	0.07	0.03	0.09	0.03	0.1	0.04	0.13	0.05	0.17	0.07	0.2	0.08	0.23	0.09	0.26	0.11	0.29	0.12	0.32	0.13	0.35	0.15	0.38	0.16	0.42	0.18	0.45	0.19	0.48	0.2	0.51	0.22	0.54	0.23	0.57	0.24	0.6	0.26	0.63	0.26	0.66	0.26	0.69	0.27	0.72
3104	0	0	0	0	0	0	0	0	0	0	0	0	0	0	0	0	0	0	0	0	0	0	0	0	0	0	0	0	0	0	0	0	0	0	0	0	0	0	0	0	0	0	0	0	0	0	0	0	0
3105	0	0	0	0	0	0	0	0	0	0	0	0	0	0	0	0	0	0	0	0	0	0	0	0	0	0	0	0	0	0	0	0	0	0	0	0	0	0	0	0	0	0	0	0	0	0	0	0	0
[truncated: 83 more columns]

## Sheet: UM cell data
Cell data for Trask at Upper Mainstem
From Brooke	Converted for version 5.0
Cell number	fracVelShel	DistCov(m)	fracSpawn
101	0	0	0
102	0	0.5	0.05
103	0	0	0
104	0	0	0
201	0	0	0
202	0.15	0.25	0.15
203	0	0	0
301	0	0	0
302	0	0	0
303	0	0	0.1
304	0.05	0.5	0.4
305	0	0	0
306	0	0	0
401	0	0	0
402	0	0	0.1
403	0.2	0.1	0.1
404	0	0	0
501	0	0	0
502	0.1	0	0.1
503	0.25	0.1	0.2
504	0	0	0
601	0	0	0
602	0	0	0
603	0.2	0.3	0.05
604	0.25	0.2	0.1
605	0	0	0
701	0	0	0
702	0.25	0.25	0.1
703	0.4	1	0.05
704	0	0	0
801	0	0	0
802	0.1	0.25	0.15
803	0.15	0.1	0.05
804	0.2	0.1	0.03
805	0	0	0
806	0	0	0
901	0	0	0
902	0.05	0.2	0
903	0.2	0.5	0
904	0	0	0
1001	0	0	0
1002	0	0	0
1003	0.4	0.5	0
1004	0.2	0.2	0.15
1005	0	0	0.05
1006	0	0	0
1101	0	0	0
1102	0.05	1	0
1103	0.4	0.6	0.05
1104	0.1	0.25	0.05
1105	0	0.5	0
1106	0.05	1	0.1
1107	0	0	0
1201	0	0	0
1202	0.15	0.5	0.05
1203	0.05	0.2	0
1204	0.05	0.5	0
1205	0	0	0
1301	0	0	0
1302	0.15	0.3	0.2
1303	0.1	0.2	0.05
1304	0.1	0.5	0
1305	0.05	0.3	0.02
1306	0	0	0
1401	0	0	0
1402	0.05	0.2	0
1403	0.15	0.1	0.02
1404	0.2	0.5	0
1405	0	0	0.05
1406	0	0	0
1501	0	0	0
1502	0.1	0.05	0
1503	0.1	0.05	0.05
1504	0.1	0.3	0
1505	0	0	0
1601	0	0	0
1602	0.03	0.5	0.1
1603	0	0	0
1701	0	0	0
1702	0.2	0.25	0.05
1703	0	0	0
1801	0	0	0
1802	0	0	0
1803	0.15	0.1	0.01
1804	0.2	0.1	0.03
1805	0	0	0
1901	0	0	0
1902	0.2	0.5	0
1903	0.2	0.25	0.8
1904	0.15	0.3	0.03
1905	0	0	0
2001	0	0	0
2002	0.02	0.3	0
2003	0.02	0.5	0
2004	0.08	0.25	0
2005	0.25	0.1	0.05
2006	0	0	0
2101	0	0	0
2102	0	0	0
2103	0.01	1	0
2104	0	0	0.05
2105	0	0	0
2106	0	0	0
2201	0	0	0
2202	0.05	0.2	0
2203	0.02	0.2	0.03
2204	0	0	0
2205	0	0	0
2301	0	0	0
2302	0.05	0.25	0
2303	0.3	0.1	0.1
2304	0.2	0.8	0.1
2305	0	0	0
2401	0	0	0
2402	0.05	0.3	0
2403	0.15	0.25	0.03
2404	0.1	0.5	0
2405	0	0	0
2501	0	0	0
2502	0.03	0.2	0
2503	0.2	0.1	0.05
2504	0.15	0.2	0
2505	0	0	0
2601	0	0	0
2602	0.03	0.5	0.1
2603	0.1	0.1	0.05
2604	0	0	0
2605	0	0	0
2701	0	0	0
2702	0.5	0.05	0
2703	0.15	0.1	0.05
2704	0.15	0.05	0.1
2705	0.05	1.5	0
2706	0	0	0
2801	0	0	0
2802	0	0	0
2803	0	0	0
2804	0.15	0.2	0
2805	0.05	2	0
2806	0	0	0
2901	0	0	0
2902	0.1	0.25	0
2903	0.15	0.25	0
2904	0.1	0.5	0.1
2905	0.03	0	0
2906	0	0	0
3001	0	0	0
3002	0.05	0.5	0.15
3003	0.05	1	0.25
3004	0.05	2	0
3005	0	0	0
3101	0	0	0
3102	0.08	0.25	0.1
3103	0.05	0.5	0.15
3104	0.1	2	0
3105	0	0	0
3201	0	0	0
3202	0.15	0.25	0
3203	0.05	0.5	0.15
3204	0.03	2	0.1
3205	0	0	0

## Sheet: UM hyd data
Hydraulic file for Trask site Upper Mainstem
Created for inSTREAM v. 5 from v. 4.2 depth-velocity output file		SFR 17 Aug 2012	Flow in m3/s
Flows:	0.01		0.02		0.03		0.04		0.05		0.06		0.07		0.08		0.09		0.1		0.11		0.12		0.13		0.14		0.15		0.16		0.17		0.18		0.19		0.2		0.21		0.22		0.23		0.24		0.25
CellNum	Depth@0.01	Vel@0.01	Depth@0.02	Vel@0.02	Depth@0.03	Vel@0.03	Depth@0.04	Vel@0.04	Depth@0.05	Vel@0.05	Depth@0.06	Vel@0.06	Depth@0.07	Vel@0.07	Depth@0.08	Vel@0.08	Depth@0.09	Vel@0.09	Depth@0.1	Vel@0.1	Depth@0.11	Vel@0.11	Depth@0.12	Vel@0.12	Depth@0.13	Vel@0.13	Depth@0.14	Vel@0.14	Depth@0.15	Vel@0.15	Depth@0.16	Vel@0.16	Depth@0.17	Vel@0.17	Depth@0.18	Vel@0.18	Depth@0.19	Vel@0.19	Depth@0.2	Vel@0.2	Depth@0.21	Vel@0.21	Depth@0.22	Vel@0.22	Depth@0.23	Vel@0.23	Depth@0.24	Vel@0.24	Depth@0.25
101	0	0	0	0	0	0	0	0	0	0	0	0	0	0	0	0	0	0	0	0	0	0	0	0	0	0	0	0	0	0	0	0	0	0	0	0	0	0	0	0	0	0	0	0	0	0	0	0	0
102	0	0.01	0	0.03	0	0.08	0	0.16	0	0.25	0	0.35	0.01	0.45	0.01	0.55	0.01	0.01	0.01	0.01	0.01	0.02	0.02	0.03	0.02	0.03	0.02	0.04	0.03	0.05	0.03	0.06	0.04	0.08	0.04	0.09	0.05	0.1	0.05	0.11	0.06	0.13	0.07	0.14	0.07	0.15	0.08	0.17	0.09
103	0.04	0.42	0.04	0.81	0.04	1.15	0.04	1.43	0.04	1.66	0.04	1.82	0.05	1.92	0.05	1.98	0.05	0.03	0.05	0.04	0.05	0.05	0.06	0.06	0.06	0.07	0.06	0.08	0.07	0.1	0.07	0.11	0.08	0.12	0.08	0.14	0.09	0.15	0.09	0.16	0.1	0.18	0.11	0.19	0.11	0.21	0.12	0.22	0.13
104	0	0	0	0	0	0	0	0	0	0	0	0	0	0	0	0	0	0	0	0	0	0	0	0	0	0	0	0	0	0	0	0	0	0	0	0	0	0	0	0	0	0	0	0	0	0	0	0	0
201	0	0	0	0	0	0	0	0	0	0	0	0	0	0	0	0	0	0	0	0	0	0	0	0	0	0	0	0	0	0	0	0	0	0	0	0	0	0	0	0	0	0	0	0	0	0	0	0	0
202	0	0.01	0	0.02	0	0.04	0	0.06	0	0.09	0	0.13	0.01	0.17	0.01	0.21	0.01	0.26	0.01	0.31	0.02	0.36	0.02	0.42	0.03	0.48	0.03	0.54	0.04	0.61	0.04	0.15	0.05	0.17	0.06	0.19	0.07	0.2	0.08	0.22	0.09	0.24	0.1	0.26	0.11	0.43	0.12	0.44	0.14
203	0	0	0	0	0	0	0	0	0	0	0	0	0	0	0	0	0	0	0	0	0	0	0	0	0	0	0	0	0	0	0	0	0	0	0	0	0	0	0	0	0	0	0	0	0	0	0	0	0
301	0	0	0	0	0	0	0	0	0	0	0	0	0	0	0	0	0	0	0	0	0	0	0	0	0	0	0	0	0	0	0	0	0	0	0	0	0	0	0	0	0	0	0	0	0	0	0	0	0
302	0	0	0	0	0	0	0	0	0	0	0	0	0	0	0	0	0	0	0	0	0	0	0	0	0	0	0	0	0	0	0	0	0	0	0	0	0	0	0	0	0	0	0	0	0	0	0	0	0
303	0	0	0	0	0	0	0	0	0	0	0	0	0	0	0	0	0	0	0	0	0	0	0	0	0	0	0	0	0	0	0	0	0	0	0	0	0	0	0	0	0	0	0	0	0	0	0	0	0
304	0.03	0.27	0.03	0.53	0.03	0.77	0.03	0.98	0.04	0.04	0.04	0.06	0.04	0.07	0.05	0.09	0.05	0.11	0.05	0.13	0.06	0.15	0.07	0.17	0.07	0.18	0.08	0.2	0.09	0.21	0.1	0.25	0.11	0.26	0.12	0.27	0.13	0.28	0.15	0.28	0.16	0.29	0.17	0.3	0.19	0.3	0.2	0.31	0.22
305	0.03	0.27	0.03	0.53	0.03	0.77	0.03	0.98	0.04	0.04	0.04	0.06	0.04	0.07	0.05	0.09	0.05	0.11	0.05	0.13	0.06	0.15	0.07	0.17	0.07	0.18	0.08	0.2	0.09	0.21	0.1	0.2	0.11	0.21	0.12	0.21	0.13	0.22	0.15	0.23	0.16	0.23	0.17	0.24	0.19	0.24	0.2	0.24	0.22
306	0	0	0	0	0	0	0	0	0	0	0	0	0	0	0	0	0	0	0	0	0	0	0	0	0	0	0	0	0	0	0	0	0	0	0	0	0	0	0	0	0	0	0	0	0	0	0	0	0
401	0	0	0	0	0	0	0	0	0	0	0	0	0	0	0	0	0	0	0	0	0	0	0	0	0	0	0	0	0	0	0	0	0	0	0	0	0	0	0	0	0	0	0	0	0	0	0	0	0
402	0.15	0.31	0.24	0.02	0.32	0.03	0.38	0.04	0.44	0.04	0.49	0.05	0.54	0.05	0.59	0.06	0.64	0.06	0.68	0.06	0.73	0.07	0.77	0.07	0.81	0.08	0.85	0.09	0.88	0.09	0.92	0.05	0.96	0.05	0.99	0.06	1.03	0.06	1.06	0.06	1.1	0.07	1.13	0.07	1.16	0.07	1.19	0.08	1.23
403	0	0	0	0	0	0	0	0	0	0	0	0	0.01	0.01	0.06	0.01	0.11	0.02	0.15	0.02	0.2	0.03	0.24	0.03	0.28	0.04	0.32	0.05	0.35	0.05	0.39	0.11	0.43	0.12	0.46	0.13	0.5	0.14	0.53	0.15	0.57	0.16	0.6	0.17	0.63	0.18	0.66	0.19	0.7
404	0	0	0	0	0	0	0	0	0	0	0	0	0	0	0	0	0	0	0	0	0	0	0	0	0	0	0	0	0	0	0	0	0	0	0	0	0	0	0	0	0	0	0	0	0	0	0	0	0
501	0	0	0	0	0	0	0	0	0	0	0	0	0	0	0	0	0	0	0	0	0	0	0	0	0	0	0	0	0	0	0	0	0	0	0	0	0	0	0	0	0	0	0	0	0	0	0	0	0
502	0.08	0.08	0.08	0.17	0.08	0.01	0.08	0.02	0.09	0.03	0.09	0.04	0.09	0.06	0.1	0.08	0.1	0.09	0.1	0.11	0.11	0.13	0.11	0.15	0.12	0.18	0.13	0.2	0.13	0.22	0.14	0.2	0.15	0.21	0.15	0.23	0.16	0.24	0.17	0.26	0.18	0.27	0.19	0.29	0.2	0.3	0.21	0.31	0.22
503	0.09	0.09	0.09	0.18	0.09	0.01	0.09	0.02	0.1	0.03	0.1	0.05	0.1	0.06	0.11	0.08	0.11	0.1	0.11	0.12	0.12	0.14	0.12	0.16	0.13	0.18	0.14	0.21	0.14	0.23	0.15	0.29	0.16	0.31	0.16	0.33	0.17	0.35	0.18	0.37	0.19	0.4	0.2	0.41	0.21	0.43	0.22	0.45	0.23
504	0	0	0	0	0	0	0	0	0	0	0	0	0	0	0	0	0	0	0	0	0	0	0	0	0	0	0	0	0	0	0	0	0	0	0	0	0	0	0	0	0	0	0	0	0	0	0	0	0
601	0	0	0	0	0	0	0	0	0	0	0	0	0	0	0	0	0	0	0	0	0	0	0	0	0	0	0	0	0	0	0	0	0	0	0	0	0	0	0	0	0	0	0	0	0	0	0	0	0
602	0.01	0	0.01	0	0.02	0	0.02	0	0.03	0	0.03	0	0.04	0	0.04	0	0.05	0.01	0.05	0.01	0.06	0.01	0.07	0.01	0.08	0.01	0.08	0.01	0.09	0.01	0.1	0.04	0.11	0.04	0.12	0.04	0.13	0.04	0.14	0.05	0.15	0.05	0.16	0.05	0.17	0.05	0.18	0.05	0.19
603	0.01	0	0.01	0	0.02	0	0.02	0	0.03	0	0.03	0	0.04	0	0.04	0	0.05	0.01	0.05	0.01	0.06	0.01	0.07	0.01	0.08	0.01	0.08	0.01	0.09	0.01	0.1	0.13	0.11	0.13	0.12	0.14	0.13	0.14	0.14	0.15	0.15	0.15	0.16	0.16	0.17	0.16	0.18	0.16	0.19
604	0.32	0.01	0.32	0.02	0.33	0.03	0.33	0.04	0.34	0.05	0.34	0.07	0.35	0.08	0.35	0.1	0.36	0.11	0.36	0.13	0.37	0.14	0.38	0.15	0.39	0.16	0.39	0.17	0.4	0.18	0.41	0.04	0.42	0.04	0.43	0.04	0.44	0.04	0.45	0.04	0.46	0.04	0.47	0.04	0.48	0.04	0.49	0.04	0.5
605	0	0	0	0	0	0	0	0	0	0	0	0	0	0	0	0	0	0	0	0	0	0	0	0	0	0	0	0	0	0	0	0	0	0	0	0	0	0	0	0	0	0	0	0	0	0	0	0	0
701	0	0	0	0	0	0	0	0	0	0	0	0	0	0	0	0	0	0	0	0	0	0	0	0	0	0	0	0	0	0	0	0	0	0	0	0	0	0	0	0	0	0	0	0	0	0	0	0	0
702	0.06	0	0.06	0	0.06	0	0.06	0	0.06	0	0.06	0	0.06	0	0.07	0	0.07	0.01	0.07	0.01	0.07	0.01	0.08	0.01	0.08	0.01	0.09	0.01	0.09	0.02	0.1	0.14	0.1	0.15	0.11	0.17	0.12	0.19	0.12	0.2	0.13	0.22	0.14	0.24	0.15	0.25	0.16	0.27	0.17
703	0.31	0.03	0.31	0	0.31	0.01	0.31	0.01	0.31	0.02	0.31	0.03	0.31	0.05	0.32	0.06	0.32	0.07	0.32	0.09	0.32	0.11	0.33	0.13	0.33	0.15	0.34	0.17	0.34	0.19	0.35	0.1	0.35	0.11	0.36	0.12	0.37	0.12	0.37	0.13	0.38	0.14	0.39	0.14	0.4	0.15	0.41	0.15	0.42
704	0	0	0	0	0	0	0	0	0	0	0	0	0	0	0	0	0	0	0	0	0	0	0	0	0	0	0	0	0	0	0	0	0	0	0	0	0	0	0	0	0	0	0	0	0	0	0	0	0
801	0	0	0	0	0	0	0	0	0	0	0	0	0	0	0	0	0	0	0	0	0	0	0	0	0	0	0	0	0	0	0	0	0	0	0	0	0	0	0	0	0	0	0	0	0	0	0	0	0
802	0.12	0	0.12	0	0.12	0	0.12	0	0.12	0	0.12	0	0.13	0.01	0.13	0.01	0.13	0.01	0.13	0.01	0.14	0.01	0.14	0.01	0.15	0.01	0.15	0.01	0.16	0.02	0.17	0.36	0.17	0.38	0.18	0.4	0.19	0.41	0.2	0.42	0.21	0.43	0.23	0.44	0.24	0.44	0.26	0.45	0.27
803	0.12	0	0.12	0.01	0.12	0.02	0.12	0.03	0.12	0.05	0.12	0.07	0.13	0.08	0.13	0.1	0.13	0.13	0.13	0.15	0.14	0.17	0.14	0.18	0.15	0.2	0.15	0.21	0.16	0.23	0.17	0.13	0.17	0.14	0.18	0.14	0.19	0.15	0.2	0.15	0.21	0.16	0.23	0.16	0.24	0.16	0.26	0.16	0.27
804	0.04	0	0.04	0.02	0.04	0.04	0.04	0.06	0.04	0.09	0.04	0.13	0.05	0.17	0.05	0.22	0.05	0.27	0.05	0.32	0.06	0.37	0.06	0.42	0.07	0.48	0.07	0.53	0.08	0.57	0.09	0.31	0.09	0.33	0.1	0.35	0.11	0.38	0.12	0.39	0.13	0.41	0.15	0.43	0.16	0.44	0.18	0.45	0.19
805	0.04	0	0.04	0.02	0.04	0.04	0.04	0.06	0.04	0.09	0.04	0.13	0.05	0.17	0.05	0.22	0.05	0.27	0.05	0.32	0.06	0.37	0.06	0.42	0.07	0.48	0.07	0.53	0.08	0.57	0.09	0.31	0.09	0.33	0.1	0.35	0.11	0.38	0.12	0.39	0.13	0.41	0.15	0.43	0.16	0.44	0.18	0.45	0.19
806	0	0	0	0	0	0	0	0	0	0	0	0	0	0	0	0	0	0	0	0	0	0	0	0	0	0	0	0	0	0	0	0	0	0	0	0	0	0	0	0	0	0	0	0	0	0	0	0	0
901	0	0	0	0	0	0	0	0	0	0	0	0	0	0	0	0	0	0	0	0	0	0	0	0	0	0	0	0	0	0	0	0	0	0	0	0	0	0	0	0	0	0	0	0	0	0	0	0	0
902	0.11	0.11	0.11	0.02	0.11	0.05	0.11	0.08	0.11	0.12	0.11	0.17	0.12	0.23	0.12	0.29	0.12	0.35	0.12	0.41	0.12	0.48	0.13	0.54	0.13	0.61	0.13	0.67	0.14	0.73	0.14	0.18	0.15	0.19	0.15	0.2	0.16	0.21	0.17	0.22	0.17	0.22	0.18	0.23	0.19	0.23	0.2	0.23	0.2
903	0.03	0.02	0.03	0	0.03	0.01	0.03	0.01	0.03	0.02	0.03	0.03	0.04	0.04	0.04	0.05	0.04	0.07	0.04	0.08	0.04	0.1	0.05	0.11	0.05	0.13	0.05	0.15	0.06	0.16	0.06	0.79	0.07	0.85	0.07	0.9	0.08	0.96	0.09	1.01	0.09	1.06	0.1	1.1	0.11	1.14	0.12	1.18	0.12
904	0	0	0	0	0	0	0	0	0	0	0	0	0	0	0	0	0	0	0	0	0	0	0	0	0	0	0	0	0	0	0	0	0	0	0	0	0	0	0	0	0	0	0	0	0	0	0	0	0
1001	0	0	0	0	0	0	0	0	0	0	0	0	0	0	0	0	0	0	0	0	0	0	0	0	0	0	0	0	0	0	0	0	0	0	0	0	0	0	0	0	0	0	0	0	0	0	0	0	0
1002	0.01	0	0.01	0	0.01	0	0.01	0	0.01	0	0.01	0.01	0.01	0.01	0.02	0.01	0.02	0.01	0.02	0.02	0.03	0.02	0.03	0.02	0.04	0.03	0.04	0.03	0.05	0.04	0.06	0.02	0.07	0.02	0.08	0.02	0.09	0.02	0.1	0.02	0.12	0.02	0.13	0.02	0.15	0.02	0.17	0.02	0.19
1003	0.01	0.01	0.01	0	0.01	0.01	0.01	0.01	0.01	0.02	0.01	0.03	0.01	0.04	0.02	0.05	0.02	0.06	0.02	0.08	0.03	0.09	0.03	0.11	0.04	0.12	0.04	0.14	0.05	0.15	0.06	0.14	0.07	0.15	0.08	0.16	0.09	0.17	0.1	0.18	0.12	0.18	0.13	0.19	0.15	0.19	0.17	0.19	0.19
1004	0.11	0.04	0.11	0.01	0.11	0.03	0.11	0.05	0.11	0.07	0.11	0.09	0.11	0.12	0.12	0.15	0.12	0.18	0.12	0.21	0.13	0.23	0.13	0.25	0.14	0.27	0.14	0.29	0.15	0.3	0.16	0.26	0.17	0.26	0.18	0.27	0.19	0.27	0.2	0.27	0.22	0.27	0.23	0.26	0.25	0.26	0.27	0.26	0.29
1005	0.09	0.04	0.09	0.01	0.09	0.02	0.09	0.04	0.09	0.05	0.09	0.07	0.09	0.1	0.1	0.12	0.1	0.14	0.1	0.16	0.11	0.19	0.11	0.2	0.12	0.22	0.12	0.24	0.13	0.25	0.14	0.39	0.15	0.4	0.16	0.41	0.17	0.41	0.18	0.41	0.2	0.41	0.21	0.41	0.23	0.4	0.25	0.4	0.27
1006	0	0	0	0	0	0	0	0	0	0	0	0	0	0	0	0	0	0	0	0	0	0	0	0	0	0	0	0	0	0	0	0	0	0	0	0	0	0	0	0	0	0	0	0	0	0	0	0	0
1101	0	0	0	0	0	0	0	0	0	0	0	0	0	0	0	0	0	0	0	0	0	0	0	0	0	0	0	0	0	0	0	0	0	0	0	0	0	0	0	0	0	0	0	0	0	0	0	0	0
1102	0.04	0.01	0.04	0.01	0.04	0.02	0.04	0	0.04	0	0.04	0	0.04	0	0.05	0.01	0.05	0.01	0.05	0.01	0.06	0.02	0.06	0.02	0.07	0.03	0.07	0.03	0.08	0.04	0.09	0.23	0.1	0.24	0.11	0.26	0.12	0.28	0.13	0.29	0.14	0.31	0.16	0.32	0.18	0.33	0.19	0.34	0.21
1103	0	0	0	0	0	0	0	0	0	0	0	0	0	0	0	0	0	0	0	0	0	0	0	0	0.01	0.01	0.01	0.01	0.02	0.02	0.03	0.37	0.04	0.44	0.05	0.51	0.06	0.58	0.07	0.64	0.08	0.71	0.1	0.76	0.12	0.82	0.13	0.86	0.15
1104	0.11	0.01	0.11	0.02	0.11	0.03	0.11	0	0.11	0	0.11	0	0.11	0.01	0.12	0.01	0.12	0.02	0.12	0.02	0.13	0.03	0.13	0.03	0.14	0.04	0.14	0.05	0.15	0.06	0.16	0.07	0.17	0.07	0.18	0.07	0.19	0.07	0.2	0.08	0.21	0.08	0.23	0.08	0.25	0.08	0.26	0.08	0.28
1105	0.11	0.01	0.11	0.02	0.11	0.03	0.11	0	0.11	0	0.11	0	0.11	0.01	0.12	0.01	0.12	0.02	0.12	0.02	0.13	0.03	0.13	0.03	0.14	0.04	0.14	0.05	0.15	0.06	0.16	0.03	0.17	0.03	0.18	0.04	0.19	0.04	0.2	0.04	0.21	0.04	0.23	0.04	0.25	0.04	0.26	0.04	0.28
1106	0.11	0	0.11	0.01	0.11	0.01	0.11	0	0.11	0	0.11	0	0.11	0	0.12	0.01	0.12	0.01	0.12	0.01	0.13	0.01	0.13	0.02	0.14	0.02	0.14	0.02	0.15	0.03	0.16	0.01	0.17	0.01	0.18	0.01	0.19	0.01	0.2	0.01	0.21	0.01	0.23	0.01	0.25	0.01	0.26	0.01	0.28
1107	0	0	0	0	0	0	0	0	0	0	0	0	0	0	0	0	0	0	0	0	0	0	0	0	0	0	0	0	0	0	0	0	0	0	0	0	0	0	0	0	0	0	0	0	0	0	0	0	0
1201	0	0	0	0	0	0	0	0	0	0	0	0	0	0	0	0	0	0	0	0	0	0	0	0	0	0	0	0	0	0	0	0	0	0	0	0	0	0	0	0	0	0	0	0	0	0	0	0	0
1202	0.26	0.03	0.26	0	0.26	0.01	0.26	0.01	0.26	0.02	0.26	0.03	0.26	0.04	0.26	0.06	0.26	0.07	0.26	0.09	0.26	0.11	0.27	0.13	0.27	0.15	0.27	0.18	0.28	0.2	0.28	0.17	0.28	0.18	0.29	0.2	0.29	0.22	0.3	0.24	0.31	0.27	0.31	0.29	0.32	0.31	0.33	0.33	0.34
1203	0.26	0.03	0.26	0	0.26	0.01	0.26	0.01	0.26	0.02	0.26	0.03	0.26	0.04	0.26	0.06	0.26	0.07	0.26	0.09	0.26	0.11	0.27	0.13	0.27	0.15	0.27	0.18	0.28	0.2	0.28	0.23	0.28	0.25	0.29	0.28	0.29	0.31	0.3	0.34	0.31	0.36	0.31	0.39	0.32	0.42	0.33	0.45	0.34
1204	0.26	0.01	0.26	0	0.26	0	0.26	0	0.26	0.01	0.26	0.01	0.26	0.01	0.26	0.02	0.26	0.02	0.26	0.03	0.26	0.03	0.27	0.04	0.27	0.04	0.27	0.05	0.28	0.06	0.28	0.13	0.28	0.14	0.29	0.16	0.29	0.17	0.3	0.19	0.31	0.21	0.31	0.22	0.32	0.24	0.33	0.25	0.34
1205	0	0	0	0	0	0	0	0	0	0	0	0	0	0	0	0	0	0	0	0	0	0	0	0	0	0	0	0	0	0	0	0	0	0	0	0	0	0	0	0	0	0	0	0	0	0	0	0	0
1301	0	0	0	0	0	0	0	0	0	0	0	0	0	0	0	0	0	0	0	0	0	0	0	0	0	0	0	0	0	0	0	0	0	0	0	0	0	0	0	0	0	0	0	0	0	0	0	0	0
1302	0.16	0	0.16	0.01	0.16	0.01	0.16	0.02	0.17	0.02	0.17	0.03	0.17	0.03	0.18	0.04	0.18	0.05	0.18	0.05	0.19	0.06	0.19	0.06	0.2	0.07	0.2	0.07	0.21	0.08	0.22	0.14	0.22	0.15	0.23	0.16	0.24	0.16	0.25	0.17	0.25	0.17	0.26	0.18	0.27	0.18	0.28	0.19	0.29
1303	0.17	0.01	0.17	0.03	0.17	0.05	0.17	0.07	0.18	0.09	0.18	0.11	0.18	0.13	0.19	0.15	0.19	0.17	0.19	0.19	0.2	0.21	0.2	0.23	0.21	0.25	0.21	0.27	0.22	0.29	0.23	0.28	0.23	0.3	0.24	0.31	0.25	0.32	0.26	0.34	0.26	0.35	0.27	0.36	0.28	0.37	0.29	0.37	0.3
1304	0.17	0	0.17	0	0.17	0	0.17	0	0.18	0	0.18	0.01	0.18	0.01	0.19	0.01	0.19	0.01	0.19	0.01	0.2	0.01	0.2	0.01	0.21	0.01	0.21	0.01	0.22	0.02	0.23	0.02	0.23	0.02	0.24	0.02	0.25	0.02	0.26	0.02	0.26	0.02	0.27	0.02	0.28	0.02	0.29	0.02	0.3
1305	0.17	0	0.17	0	0.17	0	0.17	0	0.18	0	0.18	0.01	0.18	0.01	0.19	0.01	0.19	0.01	0.19	0.01	0.2	0.01	0.2	0.01	0.21	0.01	0.21	0.01	0.22	0.02	0.23	0.02	0.23	0.02	0.24	0.02	0.25	0.02	0.26	0.02	0.26	0.02	0.27	0.02	0.28	0.02	0.29	0.02	0.3
1306	0	0	0	0	0	0	0	0	0	0	0	0	0	0	0	0	0	0	0	0	0	0	0	0	0	0	0	0	0	0	0	0	0	0	0	0	0	0	0	0	0	0	0	0	0	0	0	0	0
1401	0	0	0	0	0	0	0	0	0	0	0	0	0	0	0	0	0	0	0	0	0	0	0	0	0	0	0	0	0	0	0	0	0	0	0	0	0	0	0	0	0	0	0	0	0	0	0	0	0
1402	0.11	0	0.11	0.01	0.11	0.02	0.11	0.04	0.11	0.06	0.11	0.08	0.11	0.11	0.12	0.14	0.12	0.17	0.12	0.2	0.13	0.23	0.13	0.27	0.14	0.3	0.14	0.33	0.14	0.37	0.15	0.18	0.16	0.2	0.16	0.21	0.17	0.23	0.18	0.24	0.18	0.25	0.19	0.27	0.2	0.28	0.21	0.29	0.21
1403	0.11	0	0.11	0.01	0.11	0.02	0.11	0.04	0.11	0.06	0.11	0.08	0.11	0.11	0.12	0.14	0.12	0.17	0.12	0.2	0.13	0.23	0.13	0.27	0.14	0.3	0.14	0.33	0.14	0.37	0.15	0.18	0.16	0.2	0.16	0.21	0.17	0.23	0.18	0.24	0.18	0.25	0.19	0.27	0.2	0.28	0.21	0.29	0.21
1404	0.11	0	0.11	0	0.11	0	0.11	0	0.11	0	0.11	0	0.11	0	0.12	0.01	0.12	0.01	0.12	0.01	0.13	0.01	0.13	0.01	0.14	0.01	0.14	0.01	0.14	0.01	0.15	0.29	0.16	0.32	0.16	0.34	0.17	0.36	0.18	0.38	0.18	0.4	0.19	0.42	0.2	0.44	0.21	0.46	0.21
1405	0.11	0	0.11	0	0.11	0.01	0.11	0.01	0.11	0.02	0.11	0.03	0.11	0.04	0.12	0.05	0.12	0.06	0.12	0.07	0.13	0.08	0.13	0.1	0.14	0.11	0.14	0.12	0.14	0.13	0.15	0.13	0.16	0.15	0.16	0.16	0.17	0.17	0.18	0.18	0.18	0.19	0.19	0.19	0.2	0.2	0.21	0.21	0.21
1406	0	0	0	0	0	0	0	0	0	0	0	0	0	0	0	0	0	0	0	0	0	0	0	0	0	0	0	0	0	0	0	0	0	0	0	0	0	0	0	0	0	0	0	0	0	0	0	0	0
1501	0	0	0	0	0	0	0	0	0	0	0	0	0	0	0	0	0	0	0	0	0	0	0	0	0	0	0	0	0	0	0	0	0	0	0	0	0	0	0	0	0	0	0	0	0	0	0	0	0
1502	0.28	0.01	0.28	0	0.28	0	0.28	0	0.28	0.01	0.28	0.01	0.28	0.02	0.28	0.03	0.28	0.04	0.28	0.05	0.28	0.07	0.28	0.09	0.28	0.11	0.29	0.13	0.29	0.15	0.29	0.07	0.3	0.08	0.31	0.09	0.31	0.11	0.32	0.12	0.33	0.13	0.34	0.14	0.36	0.16	0.37	0.17	0.39
1503	0.35	0.01	0.35	0	0.35	0	0.35	0.01	0.35	0.01	0.35	0.02	0.35	0.02	0.35	0.03	0.35	0.05	0.35	0.06	0.35	0.08	0.35	0.1	0.35	0.12	0.36	0.15	0.36	0.17	0.36	0.14	0.37	0.16	0.38	0.19	0.38	0.21	0.39	0.24	0.4	0.26	0.41	0.29	0.43	0.31	0.44	0.33	0.46
1504	0.35	0.01	0.35	0	0.35	0	0.35	0.01	0.35	0.01	0.35	0.02	0.35	0.02	0.35	0.03	0.35	0.05	0.35	0.06	0.35	0.08	0.35	0.1	0.35	0.12	0.36	0.15	0.36	0.17	0.36	0.35	0.37	0.41	0.38	0.47	0.38	0.53	0.39	0.59	0.4	0.65	0.41	0.71	0.43	0.77	0.44	0.83	0.46
1505	0	0	0	0	0	0	0	0	0	0	0	0	0	0	0	0	0	0	0	0	0	0	0	0	0	0	0	0	0	0	0	0	0	0	0	0	0	0	0	0	0	0	0	0	0	0	0	0	0
1601	0	0	0	0	0	0	0	0	0	0	0	0	0	0	0	0	0	0	0	0	0	0	0	0	0	0	0	0	0	0	0	0	0	0	0	0	0	0	0	0	0	0	0	0	0	0	0	0	0
1602	0.23	0.33	0.23	0.66	0.23	0.99	0.23	1.32	0.23	1.64	0.23	1.96	0.23	2.28	0.23	0.04	0.23	0.06	0.23	0.07	0.23	0.09	0.23	0.12	0.24	0.14	0.24	0.17	0.24	0.2	0.25	0.24	0.25	0.27	0.26	0.3	0.26	0.34	0.27	0.37	0.28	0.4	0.28	0.44	0.29	0.46	0.3	0.49	0.31
1603	0	0	0	0	0	0	0	0	0	0	0	0	0	0	0	0	0	0	0	0	0	0	0	0	0	0	0	0	0	0	0	0	0	0	0	0	0	0	0	0	0	0	0	0	0	0	0	0	0
1701	0	0	0	0	0	0	0	0	0	0	0	0	0	0	0	0	0	0	0	0	0	0	0	0	0	0	0	0	0	0	0	0	0	0	0	0	0	0	0	0	0	0	0	0	0	0	0	0	0
1702	0.14	0.05	0.14	0.05	0.14	0.05	0.14	0.05	0.14	0.05	0.14	0.05	0.14	0.05	0.14	0.05	0.15	0.05	0.15	0.05	0.15	0.05	0.15	0.05	0.15	0.05	0.16	0.05	0.16	0.05	0.17	0.19	0.17	0.22	0.18	0.26	0.18	0.29	0.19	0.33	0.2	0.36	0.21	0.4	0.22	0.43	0.23	0.46	0.24
1703	0	0	0	0	0	0	0	0	0	0	0	0	0	0	0	0	0	0	0	0	0	0	0	0	0	0	0	0	0	0	0	0	0	0	0	0	0	0	0	0	0	0	0	0	0	0	0	0	0
1801	0	0	0	0	0	0	0	0	0	0	0	0	0	0	0	0	0	0	0	0	0	0	0	0	0	0	0	0	0	0	0	0	0	0	0	0	0	0	0	0	0	0	0	0	0	0	0	0	0
1802	0.13	0.03	0.13	0.05	0.13	0.08	0.13	0.1	0.13	0	0.13	0.01	0.13	0.01	0.13	0.02	0.13	0.02	0.13	0.03	0.13	0.04	0.14	0.06	0.14	0.07	0.14	0.09	0.15	0.11	0.15	0.27	0.16	0.31	0.17	0.37	0.18	0.42	0.18	0.47	0.19	0.53	0.2	0.59	0.22	0.65	0.23	0.7	0.24
1803	0.13	0.03	0.13	0.05	0.13	0.08	0.13	0.1	0.13	0	0.13	0.01	0.13	0.01	0.13	0.02	0.13	0.02	0.13	0.03	0.13	0.04	0.14	0.06	0.14	0.07	0.14	0.09	0.15	0.11	0.15	0.11	0.16	0.13	0.17	0.16	0.18	0.18	0.18	0.2	0.19	0.23	0.2	0.25	0.22	0.28	0.23	0.3	0.24
1804	0.13	0.03	0.13	0.05	0.13	0.08	0.13	0.1	0.13	0	0.13	0.01	0.13	0.01	0.13	0.02	0.13	0.02	0.13	0.03	0.13	0.04	0.14	0.06	0.14	0.07	0.14	0.09	0.15	0.11	0.15	0.04	0.16	0.05	0.17	0.06	0.18	0.07	0.18	0.08	0.19	0.08	0.2	0.09	0.22	0.1	0.23	0.11	0.24
1805	0	0	0	0	0	0	0	0	0	0	0	0	0	0	0	0	0	0	0	0	0	0	0	0	0	0	0	0	0	0	0	0	0	0	0	0	0	0	0	0	0	0	0	0	0	0	0	0	0
1901	0	0	0	0	0	0	0	0	0	0	0	0	0	0	0	0	0	0	0	0	0	0	0	0	0	0	0	0	0	0	0	0	0	0	0	0	0	0	0	0	0	0	0	0	0	0	0	0	0
1902	0.46	0	0.46	0	0.46	0.01	0.46	0.01	0.46	0.01	0.46	0.01	0.46	0.02	0.46	0.02	0.46	0.02	0.46	0.02	0.46	0.02	0.46	0.03	0.47	0.03	0.47	0.03	0.47	0.03	0.48	0.01	0.48	0.01	0.49	0.01	0.49	0.01	0.5	0.01	0.5	0.02	0.51	0.02	0.52	0.02	0.53	0.02	0.54
1903	0.31	0.01	0.31	0.01	0.31	0.02	0.31	0.02	0.31	0.03	0.31	0.04	0.31	0.05	0.31	0.05	0.31	0.06	0.31	0.07	0.31	0.07	0.31	0.08	0.32	0.09	0.32	0.09	0.32	0.1	0.33	0.09	0.33	0.09	0.34	0.1	0.34	0.1	0.35	0.11	0.35	0.11	0.36	0.11	0.37	0.11	0.38	0.12	0.39
1904	0.19	0	0.19	0	0.19	0	0.19	0.01	0.19	0.01	0.19	0.01	0.19	0.01	0.19	0.01	0.19	0.01	0.19	0.01	0.19	0.02	0.19	0.02	0.2	0.02	0.2	0.02	0.2	0.02	0.21	0.1	0.21	0.11	0.22	0.11	0.22	0.12	0.23	0.12	0.23	0.13	0.24	0.13	0.25	0.13	0.26	0.14	0.27
1905	0	0	0	0	0	0	0	0	0	0	0	0	0	0	0	0	0	0	0	0	0	0	0	0	0	0	0	0	0	0	0	0	0	0	0	0	0	0	0	0	0	0	0	0	0	0	0	0	0
2001	0	0	0	0	0	0	0	0	0	0	0	0	0	0	0	0	0	0	0	0	0	0	0	0	0	0	0	0	0	0	0	0	0	0	0	0	0	0	0	0	0	0	0	0	0	0	0	0	0
2002	0.1	0	0.1	0.01	0.1	0.02	0.1	0.03	0.11	0.04	0.11	0.05	0.11	0.06	0.12	0.08	0.12	0.09	0.13	0.1	0.13	0.11	0.14	0.12	0.15	0.13	0.15	0.14	0.16	0.15	0.17	0.02	0.18	0.02	0.2	0.02	0.21	0.02	0.22	0.02	0.24	0.02	0.25	0.03	0.27	0.03	0.29	0.03	0.31
2003	0.1	0	0.1	0	0.1	0.01	0.1	0.01	0.11	0.02	0.11	0.02	0.11	0.03	0.12	0.03	0.12	0.04	0.13	0.04	0.13	0.05	0.14	0.05	0.15	0.05	0.15	0.06	0.16	0.06	0.17	0.07	0.18	0.07	0.2	0.08	0.21	0.08	0.22	0.08	0.24	0.09	0.25	0.09	0.27	0.09	0.29	0.09	0.31
2004	0.04	0.01	0.04	0.02	0.04	0.04	0.04	0.07	0.05	0.1	0.05	0.13	0.05	0.17	0.06	0.21	0.06	0.25	0.07	0.29	0.07	0.33	0.08	0.38	0.09	0.42	0.09	0.45	0.1	0.49	0.11	0.28	0.12	0.3	0.14	0.32	0.15	0.34	0.16	0.36	0.18	0.37	0.19	0.39	0.21	0.4	0.23	0.41	0.25
2005	0.28	0.01	0.28	0.02	0.28	0.03	0.28	0.05	0.29	0.07	0.29	0.1	0.29	0.12	0.3	0.14	0.3	0.16	0.31	0.18	0.31	0.2	0.32	0.21	0.33	0.22	0.33	0.23	0.34	0.24	0.35	0.61	0.36	0.64	0.38	0.65	0.39	0.66	0.4	0.67	0.42	0.68	0.43	0.68	0.45	0.69	0.47	0.68	0.49
2006	0	0	0	0	0	0	0	0	0	0	0	0	0	0	0	0	0	0	0	0	0	0	0	0	0	0	0	0	0	0	0	0	0	0	0	0	0	0	0	0	0	0	0	0	0	0	0	0	0
2101	0	0	0	0	0	0	0	0	0	0	0	0	0	0	0	0	0	0	0	0	0	0	0	0	0	0	0	0	0	0	0	0	0	0	0	0	0	0	0	0	0	0	0	0	0	0	0	0	0
2102	0.34	0.01	0.34	0.03	0.34	0	0.34	0.01	0.34	0.01	0.34	0.02	0.34	0.02	0.34	0.03	0.34	0.04	0.34	0.05	0.35	0.07	0.35	0.08	0.35	0.1	0.36	0.12	0.36	0.13	0.37	0.1	0.38	0.11	0.39	0.12	0.4	0.13	0.41	0.14	0.42	0.15	0.43	0.16	0.45	0.17	0.47	0.18	0.49
2103	0.23	0	0.23	0.01	0.23	0	0.23	0	0.23	0	0.23	0	0.23	0.01	0.23	0.01	0.23	0.01	0.23	0.02	0.24	0.02	0.24	0.02	0.24	0.03	0.25	0.04	0.25	0.04	0.26	0.03	0.27	0.03	0.28	0.04	0.29	0.04	0.3	0.05	0.31	0.05	0.32	0.05	0.34	0.06	0.36	0.06	0.38
2104	0.23	0	0.23	0.01	0.23	0	0.23	0	0.23	0	0.23	0	0.23	0.01	0.23	0.01	0.23	0.01	0.23	0.02	0.24	0.02	0.24	0.02	0.24	0.03	0.25	0.04	0.25	0.04	0.26	0.08	0.27	0.09	0.28	0.1	0.29	0.11	0.3	0.12	0.31	0.13	0.32	0.14	0.34	0.15	0.36	0.16	0.38
2105	0.23	0	0.23	0.01	0.23	0	0.23	0	0.23	0	0.23	0	0.23	0.01	0.23	0.01	0.23	0.01	0.23	0.02	0.24	0.02	0.24	0.02	0.24	0.03	0.25	0.04	0.25	0.04	0.26	0.03	0.27	0.03	0.28	0.04	0.29	0.04	0.3	0.05	0.31	0.05	0.32	0.05	0.34	0.06	0.36	0.06	0.38
2106	0	0	0	0	0	0	0	0	0	0	0	0	0	0	0	0	0	0	0	0	0	0	0	0	0	0	0	0	0	0	0	0	0	0	0	0	0	0	0	0	0	0	0	0	0	0	0	0	0
2201	0	0	0	0	0	0	0	0	0	0	0	0	0	0	0	0	0	0	0	0	0	0	0	0	0	0	0	0	0	0	0	0	0	0	0	0	0	0	0	0	0	0	0	0	0	0	0	0	0
2202	0.31	0	0.31	0.01	0.31	0.01	0.32	0.01	0.33	0.02	0.33	0.02	0.34	0.03	0.35	0.03	0.36	0.04	0.37	0.04	0.38	0.05	0.4	0.05	0.41	0.05	0.42	0.06	0.44	0.06	0.46	0.04	0.47	0.05	0.49	0.05	0.51	0.05	0.53	0.05	0.55	0.05	0.57	0.05	0.59	0.05	0.61	0.06	0.63
2203	0.27	0	0.27	0.01	0.27	0.01	0.28	0.02	0.29	0.02	0.29	0.03	0.3	0.04	0.31	0.04	0.32	0.05	0.33	0.05	0.34	0.06	0.36	0.07	0.37	0.07	0.38	0.08	0.4	0.08	0.42	0.09	0.43	0.09	0.45	0.1	0.47	0.1	0.49	0.1	0.51	0.1	0.53	0.11	0.55	0.11	0.57	0.11	0.59
2204	0.15	0	0.15	0	0.15	0.01	0.16	0.01	0.17	0.02	0.17	0.02	0.18	0.03	0.19	0.03	0.2	0.04	0.21	0.04	0.22	0.05	0.24	0.05	0.25	0.05	0.26	0.06	0.28	0.06	0.3	0.07	0.31	0.07	0.33	0.08	0.35	0.08	0.37	0.08	0.39	0.09	0.41	0.09	0.43	0.09	0.45	0.09	0.47
2205	0	0	0	0	0	0	0	0	0	0	0	0	0	0	0	0	0	0	0	0	0	0	0	0	0	0	0	0	0	0	0	0	0	0	0	0	0	0	0	0	0	0	0	0	0	0	0	0	0
2301	0	0	0	0	0	0	0	0	0	0	0	0	0	0	0	0	0	0	0	0	0	0	0	0	0	0	0	0	0	0	0	0	0	0	0	0	0	0	0	0	0	0	0	0	0	0	0	0	0
2302	0.2	0.02	0.2	0	0.2	0.01	0.2	0.01	0.21	0.02	0.22	0.03	0.22	0.04	0.23	0.06	0.24	0.07	0.25	0.09	0.26	0.11	0.27	0.14	0.29	0.16	0.3	0.18	0.31	0.21	0.33	0.17	0.35	0.19	0.36	0.2	0.38	0.22	0.4	0.24	0.42	0.26	0.44	0.28	0.47	0.3	0.49	0.31	0.51
2303	0.2	0.01	0.2	0	0.2	0	0.2	0	0.21	0.01	0.22	0.01	0.22	0.02	0.23	0.02	0.24	0.03	0.25	0.03	0.26	0.04	0.27	0.05	0.29	0.06	0.3	0.07	0.31	0.08	0.33	0.17	0.35	0.19	0.36	0.2	0.38	0.22	0.4	0.24	0.42	0.26	0.44	0.28	0.47	0.3	0.49	0.31	0.51
2304	0.39	0.01	0.39	0	0.39	0	0.39	0.01	0.4	0.01	0.41	0.02	0.41	0.02	0.42	0.03	0.43	0.04	0.44	0.05	0.45	0.06	0.46	0.07	0.48	0.08	0.49	0.09	0.5	0.11	0.52	0.05	0.54	0.06	0.55	0.07	0.57	0.07	0.59	0.08	0.61	0.08	0.63	0.09	0.66	0.09	0.68	0.09	0.7
2305	0	0	0	0	0	0	0	0	0	0	0	0	0	0	0	0	0	0	0	0	0	0	0	0	0	0	0	0	0	0	0	0	0	0	0	0	0	0	0	0	0	0	0	0	0	0	0	0	0
2401	0	0	0	0	0	0	0	0	0	0	0	0	0	0	0	0	0	0	0	0	0	0	0	0	0	0	0	0	0	0	0	0	0	0	0	0	0	0	0	0	0	0	0	0	0	0	0	0	0
2402	0	0.01	0.03	0.09	0.06	0.11	0.08	0.15	0.1	0.18	0.13	0.21	0.15	0.25	0.17	0.29	0.19	0.32	0.21	0.36	0.23	0.4	0.25	0.44	0.27	0.48	0.29	0.52	0.31	0.56	0.33	0.61	0.35	0.65	0.36	0.69	0.38	0.73	0.4	0.77	0.42	0.82	0.44	0.86	0.45	0.9	0.47	0.94	0.49
2403	0	0	0.03	0.01	0.06	0.02	0.08	0.02	0.1	0.03	0.13	0.04	0.15	0.04	0.17	0.05	0.19	0.05	0.21	0.06	0.23	0.07	0.25	0.07	0.27	0.08	0.29	0.09	0.31	0.09	0.33	0.01	0.35	0.01	0.36	0.01	0.38	0.01	0.4	0.01	0.42	0.01	0.44	0.01	0.45	0.01	0.47	0.01	0.49
2404	0.08	0	0.11	0	0.14	0	0.16	0.01	0.18	0.01	0.21	0.01	0.23	0.01	0.25	0.01	0.27	0.01	0.29	0.01	0.31	0.01	0.33	0.01	0.35	0.01	0.37	0.01	0.39	0.01	0.41	0.15	0.43	0.15	0.44	0.16	0.46	0.17	0.48	0.18	0.5	0.19	0.52	0.2	0.53	0.21	0.55	0.22	0.57
2405	0	0	0	0	0	0	0	0	0	0	0	0	0	0	0	0	0	0	0	0	0	0	0	0	0	0	0	0	0	0	0	0	0	0	0	0	0	0	0	0	0	0	0	0	0	0	0	0	0
2501	0	0	0	0	0	0	0	0	0	0	0	0	0	0	0	0	0	0	0	0	0	0	0	0	0	0	0	0	0	0	0	0	0	0	0	0	0	0	0	0	0	0	0	0	0	0	0	0	0
2502	0.01	0	0.04	0.01	0.06	0.02	0.09	0.02	0.11	0.03	0.14	0.03	0.16	0.04	0.18	0.04	0.2	0.05	0.23	0.05	0.25	0.06	0.27	0.06	0.29	0.07	0.31	0.07	0.33	0.07	0.35	0.33	0.37	0.35	0.39	0.36	0.41	0.38	0.43	0.39	0.45	0.41	0.47	0.42	0.48	0.43	0.5	0.45	0.52
2503	0.04	0.11	0.07	0.17	0.09	0.23	0.12	0.29	0.14	0.34	0.17	0.39	0.19	0.44	0.21	0.49	0.23	0.54	0.26	0.58	0.28	0.63	0.3	0.67	0.32	0.71	0.34	0.75	0.36	0.79	0.38	0.47	0.4	0.48	0.42	0.5	0.44	0.52	0.46	0.54	0.48	0.56	0.5	0.58	0.51	0.6	0.53	0.61	0.55
2504	0.04	0.02	0.07	0.03	0.09	0.04	0.12	0.05	0.14	0.06	0.17	0.07	0.19	0.08	0.21	0.09	0.23	0.1	0.26	0.11	0.28	0.11	0.3	0.12	0.32	0.13	0.34	0.14	0.36	0.14	0.38	0.46	0.4	0.48	0.42	0.49	0.44	0.51	0.46	0.53	0.48	0.55	0.5	0.57	0.51	0.58	0.53	0.6	0.55
2505	0	0	0	0	0	0	0	0	0	0	0	0	0	0	0	0	0	0	0	0	0	0	0	0	0	0	0	0	0	0	0	0	0	0	0	0	0	0	0	0	0	0	0	0	0	0	0	0	0
2601	0	0	0	0	0	0	0	0	0	0	0	0	0	0	0	0	0	0	0	0	0	0	0	0	0	0	0	0	0	0	0	0	0	0	0	0	0	0	0	0	0	0	0	0	0	0	0	0	0
2602	0.05	0.01	0.09	0.03	0.12	0.04	0.15	0.06	0.17	0.08	0.2	0.09	0.23	0.11	0.25	0.13	0.27	0.15	0.3	0.17	0.32	0.18	0.34	0.2	0.36	0.22	0.38	0.24	0.4	0.26	0.42	0.03	0.44	0.03	0.46	0.03	0.48	0.03	0.5	0.03	0.52	0.04	0.54	0.04	0.56	0.04	0.57	0.04	0.59
2603	0.05	0	0.09	0.01	0.12	0.01	0.15	0.02	0.17	0.02	0.2	0.03	0.23	0.03	0.25	0.04	0.27	0.04	0.3	0.05	0.32	0.05	0.34	0.06	0.36	0.07	0.38	0.07	0.4	0.08	0.42	0.15	0.44	0.16	0.46	0.17	0.48	0.18	0.5	0.19	0.52	0.19	0.54	0.2	0.56	0.21	0.57	0.22	0.59
2604	0.05	0	0.09	0	0.12	0	0.15	0	0.17	0	0.2	0.01	0.23	0.01	0.25	0.01	0.27	0.01	0.3	0.01	0.32	0.01	0.34	0.01	0.36	0.01	0.38	0.01	0.4	0.02	0.42	0.28	0.44	0.3	0.46	0.32	0.48	0.34	0.5	0.35	0.52	0.37	0.54	0.39	0.56	0.41	0.57	0.42	0.59
2605	0	0	0	0	0	0	0	0	0	0	0	0	0	0	0	0	0	0	0	0	0	0	0	0	0	0	0	0	0	0	0	0	0	0	0	0	0	0	0	0	0	0	0	0	0	0	0	0	0
2701	0	0	0	0	0	0	0	0	0	0	0	0	0	0	0	0	0	0	0	0	0	0	0	0	0	0	0	0	0	0	0	0	0	0	0	0	0	0	0	0	0	0	0	0	0	0	0	0	0
2702	0	0	0	0	0.01	0.01	0.01	0.01	0.01	0.01	0.02	0.01	0.03	0.01	0.03	0.01	0.04	0.01	0.05	0.01	0.06	0.01	0.07	0.01	0.08	0.01	0.1	0.01	0.11	0.01	0.12	0.26	0.14	0.26	0.16	0.27	0.17	0.28	0.19	0.28	0.21	0.29	0.23	0.3	0.25	0.3	0.27	0.31	0.29
2703	0	0.02	0	0.05	0.01	0.17	0.01	0.2	0.01	0.22	0.02	0.24	0.03	0.25	0.03	0.27	0.04	0.28	0.05	0.3	0.06	0.31	0.07	0.32	0.08	0.33	0.1	0.35	0.11	0.36	0.12	0.12	0.14	0.12	0.16	0.12	0.17	0.13	0.19	0.13	0.21	0.13	0.23	0.13	0.25	0.14	0.27	0.14	0.29
2704	0	0.01	0	0.01	0.01	0.05	0.01	0.06	0.01	0.07	0.02	0.07	0.03	0.08	0.03	0.08	0.04	0.09	0.05	0.09	0.06	0.09	0.07	0.1	0.08	0.1	0.1	0.1	0.11	0.11	0.12	0.26	0.14	0.27	0.16	0.28	0.17	0.28	0.19	0.29	0.21	0.3	0.23	0.3	0.25	0.31	0.27	0.32	0.29
2705	0	0.01	0	0.01	0.01	0.05	0.01	0.06	0.01	0.07	0.02	0.07	0.03	0.08	0.03	0.08	0.04	0.09	0.05	0.09	0.06	0.09	0.07	0.1	0.08	0.1	0.1	0.1	0.11	0.11	0.12	0.01	0.14	0.01	0.16	0.01	0.17	0.01	0.19	0.01	0.21	0.01	0.23	0.01	0.25	0.02	0.27	0.02	0.29
2706	0	0	0	0	0	0	0	0	0	0	0	0	0	0	0	0	0	0	0	0	0	0	0	0	0	0	0	0	0	0	0	0	0	0	0	0	0	0	0	0	0	0	0	0	0	0	0	0	0
2801	0	0	0	0	0	0	0	0	0	0	0	0	0	0	0	0	0	0	0	0	0	0	0	0	0	0	0	0	0	0	0	0	0	0	0	0	0	0	0	0	0	0	0	0	0	0	0	0	0
2802	0.02	0.08	0.02	0.17	0.02	0.25	0.02	0.32	0.02	0.01	0.02	0.02	0.03	0.02	0.03	0.03	0.03	0.05	0.03	0.06	0.04	0.07	0.04	0.09	0.04	0.1	0.05	0.12	0.05	0.13	0.06	0.1	0.06	0.11	0.07	0.12	0.08	0.13	0.09	0.14	0.09	0.15	0.1	0.16	0.11	0.16	0.12	0.17	0.13
2803	0.02	0.01	0.02	0.02	0.02	0.03	0.02	0.04	0.02	0	0.02	0	0.03	0	0.03	0	0.03	0.01	0.03	0.01	0.04	0.01	0.04	0.01	0.04	0.01	0.05	0.01	0.05	0.02	0.06	0.06	0.06	0.07	0.07	0.08	0.08	0.08	0.09	0.09	0.09	0.1	0.1	0.1	0.11	0.11	0.12	0.12	0.13
2804	0.02	0.06	0.02	0.13	0.02	0.18	0.02	0.24	0.02	0.01	0.02	0.01	0.03	0.02	0.03	0.03	0.03	0.03	0.03	0.04	0.04	0.05	0.04	0.07	0.04	0.08	0.05	0.09	0.05	0.1	0.06	0.1	0.06	0.11	0.07	0.12	0.08	0.13	0.09	0.14	0.09	0.15	0.1	0.16	0.11	0.16	0.12	0.17	0.13
2805	0.02	0.06	0.02	0.13	0.02	0.18	0.02	0.24	0.02	0.01	0.02	0.01	0.03	0.02	0.03	0.03	0.03	0.03	0.03	0.04	0.04	0.05	0.04	0.07	0.04	0.08	0.05	0.09	0.05	0.1	0.06	0.12	0.06	0.13	0.07	0.15	0.08	0.16	0.09	0.17	0.09	0.18	0.1	0.19	0.11	0.21	0.12	0.22	0.13
2806	0	0	0	0	0	0	0	0	0	0	0	0	0	0	0	0	0	0	0	0	0	0	0	0	0	0	0	0	0	0	0	0	0	0	0	0	0	0	0	0	0	0	0	0	0	0	0	0	0
2901	0	0	0	0	0	0	0	0	0	0	0	0	0	0	0	0	0	0	0	0	0	0	0	0	0	0	0	0	0	0	0	0	0	0	0	0	0	0	0	0	0	0	0	0	0	0	0	0	0
2902	0.09	0	0.09	0.01	0.09	0.02	0.09	0.03	0.09	0.05	0.09	0.07	0.09	0.09	0.09	0.11	0.09	0.13	0.1	0.15	0.1	0.18	0.1	0.2	0.1	0.23	0.1	0.25	0.11	0.28	0.11	0.01	0.11	0.02	0.12	0.02	0.12	0.02	0.13	0.02	0.13	0.02	0.14	0.02	0.14	0.02	0.15	0.02	0.16
2903	0.09	0	0.09	0.01	0.09	0.02	0.09	0.03	0.09	0.05	0.09	0.06	0.09	0.08	0.09	0.1	0.09	0.12	0.1	0.14	0.1	0.17	0.1	0.19	0.1	0.21	0.1	0.24	0.11	0.26	0.11	0.34	0.11	0.36	0.12	0.39	0.12	0.41	0.13	0.43	0.13	0.45	0.14	0.47	0.14	0.49	0.15	0.5	0.16
2904	0.09	0	0.09	0.01	0.09	0.03	0.09	0.05	0.09	0.07	0.09	0.1	0.09	0.12	0.09	0.15	0.09	0.19	0.1	0.22	0.1	0.26	0.1	0.29	0.1	0.33	0.1	0.37	0.11	0.4	0.11	0.24	0.11	0.26	0.12	0.28	0.12	0.3	0.13	0.31	0.13	0.33	0.14	0.34	0.14	0.35	0.15	0.36	0.16
2905	0.09	0	0.09	0	0.09	0.01	0.09	0.01	0.09	0.02	0.09	0.02	0.09	0.03	0.09	0.03	0.09	0.04	0.1	0.05	0.1	0.06	0.1	0.06	0.1	0.07	0.1	0.08	0.11	0.09	0.11	0.37	0.11	0.4	0.12	0.43	0.12	0.45	0.13	0.48	0.13	0.5	0.14	0.52	0.14	0.54	0.15	0.56	0.16
2906	0	0	0	0	0	0	0	0	0	0	0	0	0	0	0	0	0	0	0	0	0	0	0	0	0	0	0	0	0	0	0	0	0	0	0	0	0	0	0	0	0	0	0	0	0	0	0	0	0
3001	0	0	0	0	0	0	0	0	0	0	0	0	0	0	0	0	0	0	0	0	0	0	0	0	0	0	0	0	0	0	0	0	0	0	0	0	0	0	0	0	0	0	0	0	0	0	0	0	0
3002	0.09	0.01	0.09	0	0.09	0	0.09	0.01	0.09	0.01	0.09	0.02	0.1	0.02	0.1	0.03	0.1	0.03	0.1	0.04	0.11	0.04	0.11	0.05	0.11	0.06	0.12	0.06	0.13	0.07	0.13	0.16	0.14	0.17	0.15	0.18	0.15	0.19	0.16	0.2	0.17	0.2	0.18	0.21	0.19	0.22	0.2	0.22	0.21
3003	0.09	0.02	0.09	0	0.09	0.01	0.09	0.01	0.09	0.02	0.09	0.03	0.1	0.04	0.1	0.05	0.1	0.06	0.1	0.07	0.11	0.08	0.11	0.09	0.11	0.1	0.12	0.11	0.13	0.12	0.13	0.11	0.14	0.11	0.15	0.12	0.15	0.12	0.16	0.13	0.17	0.13	0.18	0.14	0.19	0.14	0.2	0.14	0.21
3004	0.09	0.02	0.09	0	0.09	0.01	0.09	0.01	0.09	0.02	0.09	0.03	0.1	0.04	0.1	0.05	0.1	0.06	0.1	0.07	0.11	0.08	0.11	0.09	0.11	0.1	0.12	0.11	0.13	0.12	0.13	0.11	0.14	0.11	0.15	0.12	0.15	0.12	0.16	0.13	0.17	0.13	0.18	0.14	0.19	0.14	0.2	0.14	0.21
3005	0	0	0	0	0	0	0	0	0	0	0	0	0	0	0	0	0	0	0	0	0	0	0	0	0	0	0	0	0	0	0	0	0	0	0	0	0	0	0	0	0	0	0	0	0	0	0	0	0
3101	0	0	0	0	0	0	0	0	0	0	0	0	0	0	0	0	0	0	0	0	0	0	0	0	0	0	0	0	0	0	0	0	0	0	0	0	0	0	0	0	0	0	0	0	0	0	0	0	0
3102	0	0	0	0	0	0	0	0	0	0.01	0	0.01	0	0.01	0	0.02	0	0.02	0	0.03	0	0.03	0.01	0.04	0.01	0.04	0.02	0.05	0.02	0.06	0.03	0.04	0.03	0.05	0.04	0.05	0.05	0.06	0.06	0.07	0.07	0.08	0.08	0.09	0.09	0.1	0.11	0.11	0.12
3103	0	0	0	0	0	0	0	0	0	0.01	0	0.01	0	0.01	0	0.02	0	0.02	0	0.03	0	0.03	0.01	0.04	0.01	0.04	0.02	0.05	0.02	0.06	0.03	0.1	0.03	0.12	0.04	0.13	0.05	0.15	0.06	0.17	0.07	0.19	0.08	0.21	0.09	0.24	0.11	0.26	0.12
3104	0	0	0	0	0	0	0	0	0	0	0	0	0	0.01	0	0.01	0	0.01	0	0.01	0	0.01	0.01	0.02	0.01	0.02	0.02	0.03	0.02	0.03	0.03	0.01	0.03	0.01	0.04	0.01	0.05	0.01	0.06	0.01	0.07	0.01	0.08	0.01	0.09	0.02	0.11	0.02	0.12
3105	0	0	0	0	0	0	0	0	0	0	0	0	0	0	0	0	0	0	0	0	0	0	0	0	0	0	0	0	0	0	0	0	0	0	0	0	0	0	0	0	0	0	0	0	0	0	0	0	0
3201	0	0	0	0	0	0	0	0	0	0	0	0	0	0	0	0	0	0	0	0	0	0	0	0	0	0	0	0	0	0	0	0	0	0	0	0	0	0	0	0	0	0	0	0	0	0	0	0	0
3202	0.04	0.25	0.04	0.49	0.04	0.04	0.04	0.08	0.05	0.12	0.05	0.16	0.05	0.21	0.06	0.26	0.06	0.31	0.07	0.35	0.07	0.39	0.08	0.43	0.08	0.47	0.09	0.5	0.1	0.52	0.11	0.39	0.12	0.4	0.13	0.41	0.14	0.41	0.15	0.42	0.16	0.43	0.18	0.43	0.19	0.43	0.2	0.44	0.22
3203	0.04	0.01	0.04	0.02	0.04	0	0.04	0	0.05	0	0.05	0.01	0.05	0.01	0.06	0.01	0.06	0.01	0.07	0.01	0.07	0.01	0.08	0.01	0.08	0.01	0.09	0.02	0.1	0.02	0.11	0.01	0.12	0.01	0.13	0.01	0.14	0.01	0.15	0.01	0.16	0.01	0.18	0.01	0.19	0.01	0.2	0.01	0.22
3204	0.01	0.05	0.01	0.1	0.01	0.01	0.01	0.02	0.02	0.03	0.02	0.04	0.02	0.06	0.03	0.08	0.03	0.1	0.04	0.12	0.04	0.14	0.05	0.15	0.05	0.17	0.06	0.19	0.07	0.21	0.08	0.43	0.09	0.45	0.1	0.47	0.11	0.48	0.12	0.5	0.13	0.51	0.15	0.52	0.16	0.53	0.17	0.54	0.19
3205	0	0	0	0	0	0	0	0	0	0	0	0	0	0	0	0	0	0	0	0	0	0	0	0	0	0	0	0	0	0	0	0	0	0	0	0	0	0	0	0	0	0	0	0	0	0	0	0	0
[truncated: 73 more columns]

## Sheet: Pothole cell data
	Cell data for Trask at Pothole Creek
	From Brooke 9/11/2012
Cell number	fracVelShel	DistCov(m)	fracSpawn	Reach end code
101	0	0	0	I
102	0.05	1	0	D
103	0.1	5	0	D
104	0.05	3.5	0.1	D
105	0.03	1	0.2	I
106	0	0	0	I
201	0	0	0	I
202	0.15	1	0	I
203	0.25	0.5	0.05	I
204	0	2	0.05	I
205	0	0	0	I
301	0	0	0	I
302	0.15	1	0	I
303	0.6	1.5	0	I
304	0	0	0	I
401	0	0	0	I
402	0.05	1	0	I
403	0.1	0.5	0	I
404	0	0	0	I
501	0	0	0	I
502	0.03	1	0	I
503	0.03	1	0	I
504	0.03	1	0	I
505	0	0	0	I
601	0	0	0	I
602	0.1	1	0	I
603	0.03	1.5	0	I
604	0	0	0	I
701	0	0	0	I
702	0.05	1	0	I
703	0.03	1	0	I
704	0.05	2	0.15	I
705	0	0	0	I
801	0	0	0	I
802	0.2	1	0	I
803	0.15	2	0	I
804	0	0	0	I
901	0	0	0	I
902	0.5	0.1	0	I
903	0.3	0.1	0	I
904	0.1	2	0.05	I
905	0	0	0	I
1001	0	0	0	I
1002	0.05	0.25	0	I
1003	0.03	0.5	0.1	I
1004	0.05	0.2	0	I
1005	0	0	0	I
1101	0	0	0	I
1102	0.05	2.5	0.05	I
1103	0.2	1	0.05	I
1104	0	0	0	I
1201	0	0	0	I
1202	0	4	0	I
1203	0.03	0.5	0	I
1204	0	0	0	I
1301	0	0	0	I
1302	0.05	0.5	0.1	I
1303	0.05	0.25	0.15	I
1304	0.1	0.5	0	I
1305	0	0	0	I
1401	0	0	0	I
1402	0.2	0.5	0.2	I
1403	0.05	0.8	0	I
1404	0	0	0	I
1501	0	0	0	I
1502	0.25	0.1	0	I
1503	0.1	0.25	0.2	I
1504	0.05	0.25	0.4	I
1505	0	0	0	I
1601	0	0	0	I
1602	0.15	0.5	0.05	I
1603	0.1	0.25	0.2	I
1604	0	0	0	I
1701	0	0	0	I
1702	0.05	1	0	I
1703	0.15	1	0.1	I
1704	0	0	0	I
1801	0	0	0	I
1802	0.5	0.2	0	I
1803	0.25	0.3	0.05	I
1804	0	0	0	I
1901	0	0	0	I
1902	0.2	0.25	0.05	I
1903	0.15	0.2	0.05	I
1904	0.15	0.2	0	I
1905	0	0	0	I
2001	0	0	0	I
2002	0.3	0.2	0	I
2003	0.15	0.5	0	I
2004	0	0.2	0.1	I
2005	0	0	0	I
2101	0	0	0	I
2102	0.5	1	0	I
2103	0.1	2	0	I
2104	0	3	0	I
2105	0	0	0	I
2201	0	0	0	I
2202	0.7	0.2	0	I
2203	0.15	0.5	0	I
2204	0	0	0	I
2301	0	0	0	I
2302	0.1	0.2	0	I
2303	0.08	0.25	0	I
2304	0.1	0.25	0	I
2305	0	0	0	I
2401	0	0	0	I
2402	0.05	0.5	0	I
2403	0.05	0.5	0.03	I
2404	0.25	0.25	0.05	I
2405	0	0	0	I
2501	0	0	0	I
2502	0	1	0	I
2503	0.05	0.5	0	I
2504	0	0	0	I
2601	0	0	0	I
2602	0.05	0.5	0	I
2603	0.05	0.25	0.1	I
2604	0.1	0.1	0	I
2605	0	0	0	I
2701	0	0	0	I
2702	0.03	0.5	0	I
2703	0.1	0.25	0	I
2704	0.05	0.5	0.03	I
2705	0	0	0	I
2801	0	0	0	I
2802	0.03	0.75	0	I
2803	0.1	0.5	0.05	I
2804	0.03	0.75	0	I
2805	0	0	0	I
2901	0	0	0	I
2902	0.5	0.3	0	I
2903	0.03	0.5	0	I
2904	0.03	1	0	I
2905	0	0	0	I
3001	0	0	0	I
3002	0.5	0.75	0	I
3003	0.05	0.5	0	I
3004	0.05	2	0	I
3005	0	0	0	I
3101	0	0	0	I
3102	0.03	2	0	I
3103	0.03	3	0	I
3104	0	0	0	I
3201	0	0	0	I
3202	0.15	0.5	0.05	I
3203	0.03	0.75	0	I
3204	0	0	0	I
3301	0	0	0	I
3302	0.2	0.5	0	I
3303	0.08	0.25	0.1	I
3304	0.2	0.3	0	I
3305	0	0	0	I
3401	0	0	0	I
3402	0.08	0.25	0	I
3403	0.2	0.3	0.05	I
3404	0.25	0.3	0.05	I
3405	0.4	0.1	0	I
3406	0	0	0	I
3501	0	0	0	I
3502	0.4	0.1	0	U
3503	0.1	1	0	U
3504	0.05	1.5	0	U
3505	0	0	0	I

## Sheet: Pothole hyd data
Hydraulic file for Pothole Creek, Trask watershed
Brooke's input 9/17/2012	Flow in m3/s
Flows:	0.01		0.02		0.03		0.04		0.05		0.06		0.07		0.08		0.09		0.1		0.11		0.12		0.13		0.14		0.15		0.16		0.17		0.18		0.19		0.2		0.21		0.22		0.23		0.24		0.25
CellNum	Depth@0.01	Vel@0.01	Depth@0.02	Vel@0.02	Depth@0.03	Vel@0.03	Depth@0.04	Vel@0.04	Depth@0.05	Vel@0.05	Depth@0.06	Vel@0.06	Depth@0.07	Vel@0.07	Depth@0.08	Vel@0.08	Depth@0.09	Vel@0.09	Depth@0.1	Vel@0.1	Depth@0.11	Vel@0.11	Depth@0.12	Vel@0.12	Depth@0.13	Vel@0.13	Depth@0.14	Vel@0.14	Depth@0.15	Vel@0.15	Depth@0.16	Vel@0.16	Depth@0.17	Vel@0.17	Depth@0.18	Vel@0.18	Depth@0.19	Vel@0.19	Depth@0.2	Vel@0.2	Depth@0.21	Vel@0.21	Depth@0.22	Vel@0.22	Depth@0.23	Vel@0.23	Depth@0.24	Vel@0.24	Depth@0.25
101	0	0	0	0	0	0	0	0	0	0	0	0	0	0	0	0	0	0	0	0	0	0	0	0	0	0	0	0	0	0	0	0	0	0	0	0	0	0	0	0	0	0	0	0	0	0	0	0	0
102	0	0	0	0	0	0	0	0	0	0	0	0	0	0	0	0	0	0	0	0	0	0.03	0.01	0.05	0.01	0.07	0.02	0.06	0.02	0.07	0.02	0.08	0.03	0.08	0.03	0.09	0.04	0.1	0.04	0.1	0.05	0.11	0.05	0.11	0.06	0.12	0.06	0.12	0.07
103	0	0.02	0	0.03	0	0.05	0	0.06	0	0.07	0.01	0.08	0.01	0.09	0.01	0.1	0.02	0.11	0.02	0.12	0.02	0.13	0.03	0.14	0.03	0.15	0.04	0.09	0.04	0.09	0.04	0.09	0.05	0.1	0.05	0.1	0.06	0.1	0.06	0.11	0.07	0.11	0.07	0.11	0.08	0.11	0.08	0.12	0.09
104	0	0.02	0	0.03	0	0.05	0	0.06	0	0.07	0.01	0.08	0.01	0.09	0.01	0.1	0.02	0.11	0.02	0.12	0.02	0.13	0.03	0.14	0.03	0.15	0.04	0.21	0.04	0.21	0.04	0.22	0.05	0.23	0.05	0.24	0.06	0.24	0.06	0.25	0.07	0.26	0.07	0.26	0.08	0.26	0.08	0.27	0.09
105	0	0	0	0	0	0	0	0	0	0	0	0	0	0	0	0	0	0	0	0	0	0	0	0	0	0	0	0	0	0	0	0	0	0	0	0	0	0	0	0	0	0	0	0	0	0	0	0	0
106	0	0	0	0	0	0	0	0	0	0	0	0	0	0	0	0	0	0	0	0	0	0	0	0	0	0	0	0	0	0	0	0	0	0	0	0	0	0	0	0	0	0	0	0	0	0	0	0	0
201	0	0	0	0	0	0	0	0	0	0	0	0	0	0	0	0	0	0	0	0	0	0	0	0	0	0	0	0	0	0	0	0	0	0	0	0	0	0	0	0	0	0	0	0	0	0	0	0	0
202	0	0.1	0	0.18	0.01	0.25	0.01	0.32	0.01	0.39	0.02	19.8	0.02	0.32	0.03	0.31	0.03	0.31	0.03	0.3	0.04	0.3	0.04	0.29	0.05	0.29	0.05	0.28	0.06	0.27	0.06	0.27	0.07	0.27	0.07	0.27	0.08	0.28	0.08	0.28	0.09	0.29	0.09	0.29	0.1	0.3	0.1	0.3	0.11
203	0	0	0	0	0	0	0	0	0	0	0	0	0	0	0	0	0	0	0	0	0	0	0	0	0	0	0	0.01	0.01	0.02	0.01	0.02	0.02	0.03	0.02	0.03	0.03	0.04	0.03	0.04	0.04	0.05	0.04	0.05	0.05	0.05	0.05	0.05	0.06
204	0	0	0	0	0	0	0	0	0	0	0	0	0	0	0	0	0	0	0	0	0	0	0	0	0	0	0	0	0	0	0	0	0	0	0	0	0	0	0	0	0	0	0	0	0	0	0	0	0
205	0	0	0	0	0	0	0	0	0	0	0	0	0	0	0	0	0	0	0	0	0	0	0	0	0	0	0	0	0	0	0	0	0	0	0	0	0	0	0	0	0	0	0	0	0	0	0	0	0
301	0	0	0	0	0	0	0	0	0	0	0	0	0	0	0	0	0	0	0	0	0	0	0	0	0	0	0	0	0	0	0	0	0	0	0	0	0	0	0	0	0	0	0	0	0	0	0	0	0
302	0	0.17	0	0.02	0.01	0.03	0.01	0.04	0.01	0.05	0.02	0.06	0.02	0.07	0.02	0.08	0.03	0.08	0.03	0.09	0.03	0.1	0.04	0.1	0.04	0.1	0.05	0.19	0.05	0.2	0.05	0.2	0.06	0.21	0.06	0.22	0.07	0.22	0.07	0.23	0.08	0.23	0.08	0.24	0.09	0.24	0.09	0.24	0.1
303	0.01	0.78	0.01	0.08	0.02	0.13	0.02	0.16	0.02	0.2	0.03	0.23	0.03	0.25	0.03	0.27	0.04	0.29	0.04	0.31	0.04	0.32	0.05	0.34	0.05	0.35	0.06	0.28	0.06	0.29	0.06	0.3	0.07	0.31	0.07	0.32	0.08	0.32	0.08	0.33	0.09	0.34	0.09	0.34	0.1	0.35	0.1	0.35	0.11
304	0	0	0	0	0	0	0	0	0	0	0	0	0	0	0	0	0	0	0	0	0	0	0	0	0	0	0	0	0	0	0	0	0	0	0	0	0	0	0	0	0	0	0	0	0	0	0	0	0
401	0	0	0	0	0	0	0	0	0	0	0	0	0	0	0	0	0	0	0	0	0	0	0	0	0	0	0	0	0	0	0	0	0	0	0	0	0	0	0	0	0	0	0	0	0	0	0	0	0
402	0	0	0	0.01	0	0.02	0	0.04	0.01	0.06	0.01	0.08	0.01	0.1	0.02	0.12	0.02	0.14	0.02	0.15	0.03	0.17	0.03	0.19	0.04	0.2	0.04	0.11	0.04	0.12	0.05	0.13	0.05	0.14	0.06	0.14	0.06	0.15	0.06	0.15	0.07	0.16	0.07	0.17	0.08	0.17	0.08	0.18	0.09
403	0.06	0.05	0.07	0.11	0.07	0.15	0.07	0.19	0.08	0.22	0.08	0.25	0.08	0.28	0.09	0.3	0.09	0.32	0.09	0.33	0.1	0.35	0.1	0.36	0.11	0.38	0.11	0.48	0.11	0.49	0.12	0.51	0.12	0.52	0.13	0.53	0.13	0.54	0.13	0.55	0.14	0.57	0.14	0.57	0.15	0.58	0.15	0.59	0.16
404	0	0	0	0	0	0	0	0	0	0	0	0	0	0	0	0	0	0	0	0	0	0	0	0	0	0	0	0	0	0	0	0	0	0	0	0	0	0	0	0	0	0	0	0	0	0	0	0	0
501	0	0	0	0	0	0	0	0	0	0	0	0	0	0	0	0	0	0	0	0	0	0	0	0	0	0	0	0	0	0	0	0	0	0	0	0	0	0	0	0	0	0	0	0	0	0	0	0	0
502	0	0.01	0	0	0.01	0	0.01	0.01	0.01	0.01	0.01	0.01	0.02	0.02	0.02	0.02	0.02	0.02	0.02	0.03	0.03	0.03	0.03	0.03	0.03	0.04	0.04	0.18	0.04	0.19	0.04	0.2	0.05	0.22	0.05	0.23	0.05	0.24	0.06	0.25	0.06	0.27	0.07	0.28	0.07	0.29	0.07	0.3	0.08
503	0.02	0.17	0.02	0.02	0.03	0.04	0.03	0.07	0.03	0.09	0.03	0.11	0.04	0.13	0.04	0.15	0.04	0.17	0.04	0.19	0.05	0.21	0.05	0.23	0.05	0.25	0.06	0.24	0.06	0.25	0.06	0.26	0.07	0.28	0.07	0.29	0.07	0.3	0.08	0.31	0.08	0.33	0.09	0.34	0.09	0.35	0.09	0.36	0.1
504	0.02	0.17	0.02	0.02	0.03	0.04	0.03	0.07	0.03	0.09	0.03	0.11	0.04	0.13	0.04	0.15	0.04	0.17	0.04	0.19	0.05	0.21	0.05	0.23	0.05	0.25	0.06	0.24	0.06	0.25	0.06	0.26	0.07	0.28	0.07	0.29	0.07	0.3	0.08	0.31	0.08	0.33	0.09	0.34	0.09	0.35	0.09	0.36	0.1
505	0	0	0	0	0	0	0	0	0	0	0	0	0	0	0	0	0	0	0	0	0	0	0	0	0	0	0	0	0	0	0	0	0	0	0	0	0	0	0	0	0	0	0	0	0	0	0	0	0
601	0	0	0	0	0	0	0	0	0	0	0	0	0	0	0	0	0	0	0	0	0	0	0	0	0	0	0	0	0	0	0	0	0	0	0	0	0	0	0	0	0	0	0	0	0	0	0	0	0
602	0.01	0.15	0.02	0.2	0.02	0.25	0.03	0.28	0.03	0.32	0.04	0.34	0.04	0.37	0.05	0.4	0.05	0.42	0.06	0.44	0.06	0.46	0.07	0.48	0.07	0.5	0.07	0.41	0.08	0.43	0.08	0.44	0.09	0.45	0.09	0.46	0.09	0.48	0.1	0.49	0.1	0.5	0.1	0.51	0.11	0.52	0.11	0.53	0.12
603	0.01	0.05	0.02	0.07	0.02	0.08	0.03	0.09	0.03	0.11	0.04	0.11	0.04	0.12	0.05	0.13	0.05	0.14	0.06	0.15	0.06	0.15	0.07	0.16	0.07	0.17	0.07	0.27	0.08	0.28	0.08	0.29	0.09	0.3	0.09	0.3	0.09	0.31	0.1	0.32	0.1	0.33	0.1	0.33	0.11	0.34	0.11	0.35	0.12
604	0	0	0	0	0	0	0	0	0	0	0	0	0	0	0	0	0	0	0	0	0	0	0	0	0	0	0	0	0	0	0	0	0	0	0	0	0	0	0	0	0	0	0	0	0	0	0	0	0
701	0	0	0	0	0	0	0	0	0	0	0	0	0	0	0	0	0	0	0	0	0	0	0	0	0	0	0	0	0	0	0	0	0	0	0	0	0	0	0	0	0	0	0	0	0	0	0	0	0
702	0	0.08	0	0.14	0	0.21	0	0.28	0	0.34	0	0.41	0.01	0.47	0.01	31.79	0.01	25.68	0.01	0.25	0.01	0.25	0.02	0.26	0.02	0.26	0.02	0.18	0.03	0.13	0.03	0.1	0.03	0.08	0.03	0.07	0.04	0.07	0.04	0.07	0.04	0.06	0.05	0.06	0.05	0.06	0.05	0.06	0.06
703	0	0	0	0	0	0	0	0	0	0	0	0	0	0	0	0	0	0	0	0	0	0	0	0	0	0	0	0.03	0.01	0.04	0.01	0.04	0.01	0.04	0.01	0.04	0.02	0.04	0.02	0.04	0.02	0.04	0.03	0.04	0.03	0.04	0.03	0.04	0.04
704	0	0	0	0	0	0	0	0	0	0	0	0	0	0	0	0	0	0	0	0	0	0	0	0	0	0	0	0.13	0.01	0.15	0.01	0.15	0.01	0.14	0.01	0.14	0.02	0.14	0.02	0.15	0.02	0.15	0.03	0.15	0.03	0.16	0.03	0.16	0.04
705	0	0	0	0	0	0	0	0	0	0	0	0	0	0	0	0	0	0	0	0	0	0	0	0	0	0	0	0	0	0	0	0	0	0	0	0	0	0	0	0	0	0	0	0	0	0	0	0	0
801	0	0	0	0	0	0	0	0	0	0	0	0	0	0	0	0	0	0	0	0	0	0	0	0	0	0	0	0	0	0	0	0	0	0	0	0	0	0	0	0	0	0	0	0	0	0	0	0	0
802	0.18	0.01	0.18	0.02	0.18	0.03	0.18	0.05	0.18	0.06	0.19	0.08	0.19	0.09	0.19	0.11	0.2	0.12	0.2	0.14	0.2	0.15	0.21	0.17	0.21	0.18	0.21	0.19	0.22	0.2	0.22	0.21	0.22	0.22	0.23	0.23	0.23	0.24	0.24	0.25	0.24	0.26	0.25	0.27	0.25	0.28	0.26	0.29	0.26
803	0.05	0	0.05	0.01	0.05	0.02	0.05	0.02	0.05	0.03	0.06	0.04	0.06	0.05	0.06	0.06	0.07	0.07	0.07	0.08	0.07	0.09	0.08	0.1	0.08	0.11	0.08	0.12	0.09	0.13	0.09	0.14	0.09	0.15	0.1	0.16	0.1	0.17	0.11	0.18	0.11	0.19	0.12	0.2	0.12	0.21	0.13	0.22	0.13
804	0	0	0	0	0	0	0	0	0	0	0	0	0	0	0	0	0	0	0	0	0	0	0	0	0	0	0	0	0	0	0	0	0	0	0	0	0	0	0	0	0	0	0	0	0	0	0	0	0
901	0	0	0	0	0	0	0	0	0	0	0	0	0	0	0	0	0	0	0	0	0	0	0	0	0	0	0	0	0	0	0	0	0	0	0	0	0	0	0	0	0	0	0	0	0	0	0	0	0
902	0.03	0.27	0.04	0.06	0.04	0.09	0.04	0.11	0.05	0.13	0.05	0.15	0.06	0.17	0.06	0.18	0.06	0.19	0.07	0.2	0.07	0.21	0.08	0.22	0.09	0.22	0.09	0.64	0.1	0.67	0.1	0.7	0.11	0.72	0.11	0.74	0.12	0.76	0.13	0.78	0.13	0.81	0.14	0.82	0.15	0.84	0.15	0.86	0.16
903	0	0.12	0.01	0.04	0.01	0.09	0.01	0.14	0.02	0.18	0.02	0.23	0.03	0.27	0.03	0.31	0.03	0.35	0.04	0.38	0.04	0.41	0.05	0.44	0.06	0.46	0.06	0.12	0.07	0.13	0.07	0.14	0.08	0.14	0.08	0.15	0.09	0.16	0.1	0.16	0.1	0.17	0.11	0.17	0.12	0.18	0.12	0.18	0.13
904	0	0	0	0	0	0	0	0	0	0	0	0	0	0	0	0	0	0	0	0	0	0	0	0	0	0	0	0	0	0	0	0	0	0	0	0	0	0	0	0	0	0	0	0	0	0	0	0	0
905	0	0	0	0	0	0	0	0	0	0	0	0	0	0	0	0	0	0	0	0	0	0	0	0	0	0	0	0	0	0	0	0	0	0	0	0	0	0	0	0	0	0	0	0	0	0	0	0	0
1001	0	0	0	0	0	0	0	0	0	0	0	0	0	0	0	0	0	0	0	0	0	0	0	0	0	0	0	0	0	0	0	0	0	0	0	0	0	0	0	0	0	0	0	0	0	0	0	0	0
1002	0	0	0	0	0	0	0	0	0	0	0	0	0	0	0	0	0	0	0	0.04	0.01	0.08	0.01	0.11	0.02	0.13	0.03	0.04	0.04	0.05	0.05	0.05	0.06	0.06	0.07	0.06	0.08	0.06	0.09	0.07	0.11	0.07	0.12	0.07	0.13	0.08	0.14	0.08	0.15
1003	0.01	0.11	0.01	0.07	0.02	0.12	0.02	0.15	0.03	0.18	0.03	0.21	0.04	0.23	0.04	0.24	0.05	0.26	0.06	0.27	0.07	0.27	0.07	0.27	0.08	0.28	0.09	0.25	0.1	0.26	0.11	0.27	0.12	0.27	0.13	0.28	0.14	0.29	0.15	0.3	0.17	0.31	0.18	0.31	0.19	0.32	0.2	0.32	0.21
1004	0	0.03	0	0.03	0.01	0.06	0.01	0.1	0.02	0.13	0.02	0.16	0.03	0.18	0.03	0.2	0.04	0.22	0.05	0.23	0.06	0.24	0.06	0.25	0.07	0.26	0.08	0.39	0.09	0.4	0.1	0.42	0.11	0.43	0.12	0.45	0.13	0.46	0.14	0.47	0.16	0.49	0.17	0.5	0.18	0.51	0.19	0.52	0.2
1005	0	0	0	0	0	0	0	0	0	0	0	0	0	0	0	0	0	0	0	0	0	0	0	0	0	0	0	0	0	0	0	0	0	0	0	0	0	0	0	0	0	0	0	0	0	0	0	0	0
1101	0	0	0	0	0	0	0	0	0	0	0	0	0	0	0	0	0	0	0	0	0	0	0	0	0	0	0	0	0	0	0	0	0	0	0	0	0	0	0	0	0	0	0	0	0	0	0	0	0
1102	0	0.01	0	0.02	0.01	0.66	0.01	0.02	0.02	0.03	0.02	0.04	0.03	0.05	0.03	0.05	0.04	0.06	0.05	0.06	0.05	0.07	0.06	0.07	0.07	0.08	0.07	0.08	0.08	0.09	0.09	0.09	0.1	0.1	0.11	0.1	0.12	0.11	0.13	0.11	0.14	0.11	0.15	0.12	0.16	0.12	0.17	0.12	0.18
1103	0.01	0.04	0.01	0.05	0.02	1.18	0.02	0.04	0.03	0.04	0.03	0.05	0.04	0.06	0.04	0.06	0.05	0.07	0.06	0.07	0.06	0.08	0.07	0.08	0.08	0.09	0.08	0.09	0.09	0.1	0.1	0.1	0.11	0.1	0.12	0.11	0.13	0.11	0.14	0.12	0.15	0.12	0.16	0.12	0.17	0.13	0.18	0.13	0.19
1104	0	0	0	0	0	0	0	0	0	0	0	0	0	0	0	0	0	0	0	0	0	0	0	0	0	0	0	0	0	0	0	0	0	0	0	0	0	0	0	0	0	0	0	0	0	0	0	0	0
1201	0	0	0	0	0	0	0	0	0	0	0	0	0	0	0	0	0	0	0	0	0	0	0	0	0	0	0	0	0	0	0	0	0	0	0	0	0	0	0	0	0	0	0	0	0	0	0	0	0
1202	0	0.16	0	0.06	0.01	0.1	0.01	0.14	0.01	0.18	0.02	0.2	0.02	0.23	0.03	0.25	0.03	0.26	0.04	0.28	0.04	0.29	0.05	0.3	0.06	0.31	0.06	0.35	0.07	0.36	0.07	0.37	0.08	0.38	0.09	0.38	0.1	0.39	0.1	0.4	0.11	0.4	0.12	0.4	0.13	0.41	0.13	0.41	0.14
1203	0.01	1.3	0.01	0.27	0.02	0.38	0.02	0.45	0.02	0.51	0.03	0.55	0.03	0.58	0.04	0.61	0.04	0.64	0.05	0.66	0.05	0.67	0.06	0.69	0.07	0.7	0.07	0.68	0.08	0.7	0.08	0.7	0.09	0.71	0.1	0.72	0.11	0.73	0.11	0.74	0.12	0.74	0.13	0.75	0.14	0.75	0.14	0.76	0.15
1204	0	0	0	0	0	0	0	0	0	0	0	0	0	0	0	0	0	0	0	0	0	0	0	0	0	0	0	0	0	0	0	0	0	0	0	0	0	0	0	0	0	0	0	0	0	0	0	0	0
1301	0	0	0	0	0	0	0	0	0	0	0	0	0	0	0	0	0	0	0	0	0	0	0	0	0	0	0	0	0	0	0	0	0	0	0	0	0	0	0	0	0	0	0	0	0	0	0	0	0
1302	0	0	0	0	0	0.01	0	0.02	0.01	0.03	0.01	0.04	0.02	0.05	0.03	0.06	0.03	0.06	0.04	0.07	0.05	0.07	0.05	0.08	0.06	0.08	0.07	0.1	0.08	0.11	0.08	0.11	0.09	0.11	0.1	0.12	0.11	0.12	0.12	0.12	0.13	0.12	0.13	0.13	0.14	0.13	0.15	0.13	0.16
1303	0.03	0.03	0.04	0.07	0.04	0.11	0.04	0.15	0.05	0.18	0.05	0.2	0.06	0.22	0.07	0.24	0.07	0.25	0.08	0.26	0.09	0.27	0.09	0.28	0.1	0.29	0.11	0.39	0.12	0.4	0.12	0.4	0.13	0.41	0.14	0.41	0.15	0.42	0.16	0.42	0.17	0.43	0.17	0.43	0.18	0.43	0.19	0.44	0.2
1304	0.03	0.03	0.04	0.07	0.04	0.11	0.04	0.15	0.05	0.18	0.05	0.2	0.06	0.22	0.07	0.24	0.07	0.25	0.08	0.26	0.09	0.27	0.09	0.28	0.1	0.29	0.11	0.14	0.12	0.14	0.12	0.14	0.13	0.15	0.14	0.15	0.15	0.15	0.16	0.15	0.17	0.15	0.17	0.15	0.18	0.15	0.19	0.16	0.2
1305	0	0	0	0	0	0	0	0	0	0	0	0	0	0	0	0	0	0	0	0	0	0	0	0	0	0	0	0	0	0	0	0	0	0	0	0	0	0	0	0	0	0	0	0	0	0	0	0	0
1401	0	0	0	0	0	0	0	0	0	0	0	0	0	0	0	0	0	0	0	0	0	0	0	0	0	0	0	0	0	0	0	0	0	0	0	0	0	0	0	0	0	0	0	0	0	0	0	0	0
1402	0.08	0.24	0.09	0.06	0.09	0.09	0.09	0.13	0.1	0.16	0.11	0.19	0.11	0.22	0.12	0.24	0.12	0.26	0.13	0.28	0.14	0.3	0.15	0.31	0.15	0.32	0.16	0.32	0.17	0.33	0.18	0.34	0.18	0.34	0.19	0.35	0.2	0.36	0.21	0.36	0.22	0.37	0.23	0.37	0.24	0.37	0.25	0.37	0.26
1403	0.01	0.03	0.02	0.01	0.02	0.02	0.02	0.03	0.03	0.04	0.04	0.05	0.04	0.06	0.05	0.07	0.05	0.07	0.06	0.08	0.07	0.09	0.08	0.1	0.08	0.11	0.09	0.13	0.1	0.13	0.11	0.14	0.11	0.15	0.12	0.15	0.13	0.16	0.14	0.16	0.15	0.17	0.16	0.17	0.17	0.17	0.18	0.18	0.19
1404	0	0	0	0	0	0	0	0	0	0	0	0	0	0	0	0	0	0	0	0	0	0	0	0	0	0	0	0	0	0	0	0	0	0	0	0	0	0	0	0	0	0	0	0	0	0	0	0	0
1501	0	0	0	0	0	0	0	0	0	0	0	0	0	0	0	0	0	0	0	0	0	0	0	0	0	0	0	0	0	0	0	0	0	0	0	0	0	0	0	0	0	0	0	0	0	0	0	0	0
1502	0	0	0	0	0	0	0	0	0	0	0	0	0	0	0	0	0	0	0	0	0	0	0	0	0	0	0	0	0	0	0	0	0	0	0	0	0	0	0	0	0.01	0.05	0.02	0.07	0.03	0.09	0.04	0.11	0.05
1503	0.03	0.09	0.03	0.09	0.04	2.89	0.04	0.11	0.05	0.15	0.05	0.18	0.06	0.21	0.07	0.24	0.07	0.26	0.08	0.27	0.09	0.29	0.09	0.28	0.1	0.27	0.11	0.3	0.12	0.31	0.13	0.31	0.14	0.32	0.15	0.33	0.16	0.33	0.17	0.34	0.18	0.32	0.19	0.31	0.2	0.31	0.21	0.31	0.22
1504	0	0	0	0	0	0	0	0	0	0	0	0	0	0	0	0	0	0	0	0	0	0	0	0.03	0.01	0.06	0.02	0.02	0.03	0.02	0.04	0.03	0.05	0.03	0.06	0.03	0.07	0.03	0.08	0.04	0.09	0.04	0.1	0.04	0.11	0.04	0.12	0.04	0.13
1505	0	0	0	0	0	0	0	0	0	0	0	0	0	0	0	0	0	0	0	0	0	0	0	0	0	0	0	0	0	0	0	0	0	0	0	0	0	0	0	0	0	0	0	0	0	0	0	0	0
1601	0	0	0	0	0	0	0	0	0	0	0	0	0	0	0	0	0	0	0	0	0	0	0	0	0	0	0	0	0	0	0	0	0	0	0	0	0	0	0	0	0	0	0	0	0	0	0	0	0
1602	0	0	0	0	0	0	0	0	0	0	0	0	0	0	0	0	0	0	0	0	0	0	0	0	0	0	0	0	0	0	0	0	0	0	0	0	0	0	0	0	0	0	0	0	0	0	0	0	0
1603	0.03	0.06	0.04	0.06	0.04	0.07	0.05	0.08	0.05	0.08	0.06	0.09	0.07	0.1	0.07	0.26	0.08	0.3	0.09	0.32	0.1	0.35	0.11	0.37	0.12	0.39	0.13	0.4	0.14	0.41	0.15	0.43	0.16	0.44	0.18	0.44	0.19	0.45	0.2	0.46	0.22	0.46	0.23	0.47	0.24	0.47	0.25	0.47	0.27
1604	0	0	0	0	0	0	0	0	0	0	0	0	0	0	0	0	0	0	0	0	0	0	0	0	0	0	0	0	0	0	0	0	0	0	0	0	0	0	0	0	0	0	0	0	0	0	0	0	0
1701	0	0	0	0	0	0	0	0	0	0	0	0	0	0	0	0	0	0	0	0	0	0	0	0	0	0	0	0	0	0	0	0	0	0	0	0	0	0	0	0	0	0	0	0	0	0	0	0	0
1702	0	0.01	0.01	0	0.01	0.01	0.02	0.02	0.02	0.02	0.03	0.04	0.03	0.05	0.04	0.06	0.05	0.07	0.06	0.09	0.07	0.1	0.08	0.11	0.09	0.13	0.1	0.01	0.11	0.01	0.12	0.01	0.13	0.01	0.15	0.02	0.16	0.02	0.17	0.02	0.19	0.02	0.2	0.02	0.21	0.02	0.22	0.02	0.24
1703	0.13	0.14	0.14	0.03	0.14	0.06	0.15	0.08	0.15	0.11	0.16	0.14	0.16	0.16	0.17	0.19	0.18	0.21	0.19	0.23	0.2	0.25	0.21	0.26	0.22	0.28	0.23	0.38	0.24	0.4	0.25	0.41	0.26	0.43	0.28	0.44	0.29	0.45	0.3	0.47	0.32	0.48	0.33	0.48	0.34	0.49	0.35	0.5	0.37
1704	0	0	0	0	0	0	0	0	0	0	0	0	0	0	0	0	0	0	0	0	0	0	0	0	0	0	0	0	0	0	0	0	0	0	0	0	0	0	0	0	0	0	0	0	0	0	0	0	0
1801	0	0	0	0	0	0	0	0	0	0	0	0	0	0	0	0	0	0	0	0	0	0	0	0	0	0	0	0	0	0	0	0	0	0	0	0	0	0	0	0	0	0	0	0	0	0	0	0	0
1802	0	0	0	0	0	0	0	0	0	0	0	0	0	0	0	0	0	0	0	0	0	0	0	0	0	0	0	0	0	0	0	0	0	0	0	0	0	0	0	0	0	0	0	0	0	0	0	0	0
1803	0.12	0.33	0.12	0.62	0.13	0.05	0.13	0.09	0.14	0.13	0.15	0.18	0.15	0.24	0.16	0.29	0.17	0.34	0.18	0.39	0.18	0.44	0.19	0.48	0.2	0.52	0.21	0.56	0.22	0.59	0.23	0.62	0.25	0.65	0.26	0.67	0.27	0.69	0.28	0.71	0.3	0.73	0.31	0.74	0.32	0.75	0.33	0.75	0.35
1804	0	0	0	0	0	0	0	0	0	0	0	0	0	0	0	0	0	0	0	0	0	0	0	0	0	0	0	0	0	0	0	0	0	0	0	0	0	0	0	0	0	0	0	0	0	0	0	0	0
1901	0	0	0	0	0	0	0	0	0	0	0	0	0	0	0	0	0	0	0	0	0	0	0	0	0	0	0	0	0	0	0	0	0	0	0	0	0	0	0	0	0	0	0	0	0	0	0	0	0
1902	0.01	0.03	0.01	0.08	0.02	0.14	0.02	0.2	0.03	0.26	0.03	0.31	0.04	0.37	0.04	0.42	0.05	0.47	0.06	0.51	0.06	0.55	0.07	0.58	0.08	0.61	0.09	0.22	0.09	0.23	0.1	0.24	0.11	0.25	0.12	0.25	0.13	0.26	0.14	0.26	0.15	0.27	0.16	0.27	0.17	0.28	0.18	0.28	0.19
1903	0.11	0.07	0.11	0.16	0.12	0.24	0.12	0.3	0.13	0.35	0.13	0.39	0.14	0.43	0.14	0.45	0.15	0.47	0.16	0.49	0.16	0.5	0.17	0.5	0.18	0.51	0.19	0.75	0.19	0.75	0.2	0.76	0.21	0.76	0.22	0.76	0.23	0.76	0.24	0.76	0.25	0.76	0.26	0.76	0.27	0.75	0.28	0.75	0.29
1904	0	0	0	0	0	0	0	0.02	0.01	0.05	0.01	0.08	0.02	0.1	0.02	0.13	0.03	0.16	0.04	0.18	0.04	0.2	0.05	0.22	0.06	0.24	0.07	0.27	0.07	0.29	0.08	0.3	0.09	0.31	0.1	0.33	0.11	0.34	0.12	0.35	0.13	0.36	0.14	0.36	0.15	0.37	0.16	0.37	0.17
1905	0	0	0	0	0	0	0	0	0	0	0	0	0	0	0	0	0	0	0	0	0	0	0	0	0	0	0	0	0	0	0	0	0	0	0	0	0	0	0	0	0	0	0	0	0	0	0	0	0
2001	0	0	0	0	0	0	0	0	0	0	0	0	0	0	0	0	0	0	0	0	0	0	0	0	0	0	0	0	0	0	0	0	0	0	0	0	0	0	0	0	0	0	0	0	0	0	0	0	0
2002	0	0	0	0	0	0	0	0	0.01	0.01	0.01	0.01	0.01	0.01	0.02	0.02	0.02	0.02	0.03	0.02	0.03	0.03	0.04	0.03	0.04	0.03	0.05	0.33	0.06	0.35	0.07	0.37	0.07	0.39	0.08	0.41	0.09	0.42	0.1	0.44	0.11	0.46	0.11	0.47	0.12	0.48	0.13	0.49	0.14
2003	0.01	0.01	0.01	0.01	0.01	0.28	0.01	0.01	0.02	0.02	0.02	0.02	0.02	0.02	0.03	0.03	0.03	0.03	0.04	0.03	0.04	0.04	0.05	0.04	0.05	0.04	0.06	0.22	0.07	0.23	0.08	0.24	0.08	0.25	0.09	0.26	0.1	0.26	0.11	0.27	0.12	0.28	0.12	0.28	0.13	0.29	0.14	0.29	0.15
2004	0.01	0.1	0.01	0.11	0.01	3.6	0.01	0.14	0.02	0.2	0.02	0.25	0.02	0.3	0.03	0.34	0.03	0.39	0.04	0.42	0.04	0.46	0.05	0.49	0.05	0.52	0.06	0.22	0.07	0.23	0.08	0.24	0.08	0.25	0.09	0.26	0.1	0.26	0.11	0.27	0.12	0.28	0.12	0.28	0.13	0.29	0.14	0.29	0.15
2005	0	0	0	0	0	0	0	0	0	0	0	0	0	0	0	0	0	0	0	0	0	0	0	0	0	0	0	0	0	0	0	0	0	0	0	0	0	0	0	0	0	0	0	0	0	0	0	0	0
2101	0	0	0	0	0	0	0	0	0	0	0	0	0	0	0	0	0	0	0	0	0	0	0	0	0	0	0	0	0	0	0	0	0	0	0	0	0	0	0	0	0	0	0	0	0	0	0	0	0
2102	0	0	0	0	0	0	0	0.01	0.01	0.02	0.01	0.03	0.02	0.04	0.03	0.05	0.03	0.06	0.04	0.07	0.05	0.08	0.06	0.1	0.06	0.11	0.07	0.18	0.08	0.2	0.09	0.21	0.1	0.23	0.11	0.24	0.12	0.26	0.13	0.27	0.14	0.29	0.15	0.3	0.16	0.31	0.17	0.32	0.18
2103	0.06	0.13	0.07	0.02	0.07	0.03	0.07	0.05	0.08	0.06	0.08	0.08	0.09	0.09	0.1	0.11	0.1	0.12	0.11	0.13	0.12	0.14	0.13	0.16	0.13	0.17	0.14	0.18	0.15	0.19	0.16	0.2	0.17	0.21	0.18	0.22	0.19	0.23	0.2	0.24	0.21	0.25	0.22	0.26	0.23	0.26	0.24	0.27	0.25
2104	0	0.02	0.01	0.01	0.01	0.02	0.01	0.03	0.02	0.05	0.02	0.06	0.03	0.08	0.04	0.1	0.04	0.12	0.05	0.15	0.06	0.17	0.07	0.19	0.07	0.21	0.08	0.13	0.09	0.14	0.1	0.15	0.11	0.16	0.12	0.17	0.13	0.18	0.14	0.18	0.15	0.2	0.16	0.2	0.17	0.21	0.18	0.22	0.19
2105	0	0	0	0	0	0	0	0	0	0	0	0	0	0	0	0	0	0	0	0	0	0	0	0	0	0	0	0	0	0	0	0	0	0	0	0	0	0	0	0	0	0	0	0	0	0	0	0	0
2201	0	0	0	0	0	0	0	0	0	0	0	0	0	0	0	0	0	0	0	0	0	0	0	0	0	0	0	0	0	0	0	0	0	0	0	0	0	0	0	0	0	0	0	0	0	0	0	0	0
2202	0.12	0	0.13	0.01	0.13	0.02	0.14	0.02	0.14	0.03	0.15	0.04	0.15	0.04	0.16	0.05	0.17	0.05	0.18	0.06	0.18	0.06	0.19	0.07	0.2	0.07	0.21	0.08	0.22	0.09	0.23	0.09	0.24	0.09	0.25	0.1	0.26	0.1	0.27	0.1	0.29	0.1	0.29	0.1	0.31	0.11	0.32	0.11	0.33
2203	0.12	0.02	0.13	0.06	0.13	0.1	0.14	0.14	0.14	0.18	0.15	0.22	0.15	0.25	0.16	0.29	0.17	0.32	0.18	0.35	0.18	0.38	0.19	0.41	0.2	0.43	0.21	0.45	0.22	0.47	0.23	0.48	0.24	0.5	0.25	0.51	0.26	0.52	0.27	0.53	0.29	0.54	0.29	0.55	0.31	0.56	0.32	0.56	0.33
2204	0	0	0	0	0	0	0	0	0	0	0	0	0	0	0	0	0	0	0	0	0	0	0	0	0	0	0	0	0	0	0	0	0	0	0	0	0	0	0	0	0	0	0	0	0	0	0	0	0
2301	0	0	0	0	0	0	0	0	0	0	0	0	0	0	0	0	0	0	0	0	0	0	0	0	0	0	0	0	0	0	0	0	0	0	0	0	0	0	0	0	0	0	0	0	0	0	0	0	0
2302	0	0	0.01	0.01	0.01	0.02	0.02	0.03	0.02	0.04	0.03	0.05	0.04	0.07	0.04	0.08	0.05	0.08	0.06	0.09	0.07	0.1	0.08	0.11	0.09	0.11	0.1	0.2	0.12	0.21	0.13	0.21	0.14	0.22	0.15	0.22	0.17	0.23	0.18	0.23	0.2	0.23	0.21	0.23	0.22	0.24	0.24	0.24	0.25
2303	0.05	0.06	0.06	0.15	0.06	0.24	0.07	0.31	0.07	0.38	0.08	0.43	0.09	0.47	0.09	0.51	0.1	0.54	0.11	0.56	0.12	0.58	0.13	0.59	0.14	0.61	0.15	0.52	0.17	0.52	0.18	0.53	0.19	0.53	0.2	0.53	0.22	0.53	0.23	0.53	0.25	0.53	0.26	0.53	0.27	0.53	0.29	0.53	0.3
2304	0	0	0.01	0.02	0.01	0.04	0.02	0.06	0.02	0.08	0.03	0.11	0.04	0.13	0.04	0.15	0.05	0.17	0.06	0.19	0.07	0.2	0.08	0.21	0.09	0.22	0.1	0.33	0.12	0.34	0.13	0.35	0.14	0.36	0.15	0.36	0.17	0.37	0.18	0.37	0.2	0.38	0.21	0.38	0.22	0.38	0.24	0.39	0.25
2305	0	0	0	0	0	0	0	0	0	0	0	0	0	0	0	0	0	0	0	0	0	0	0	0	0	0	0	0	0	0	0	0	0	0	0	0	0	0	0	0	0	0	0	0	0	0	0	0	0
2401	0	0	0	0	0	0	0	0	0	0	0	0	0	0	0	0	0	0	0	0	0	0	0	0	0	0	0	0	0	0	0	0	0	0	0	0	0	0	0	0	0	0	0	0	0	0	0	0	0
2402	0	0	0.01	0.02	0.01	0.04	0.01	0.07	0.02	0.11	0.03	0.14	0.03	0.17	0.04	0.2	0.05	0.23	0.06	0.25	0.06	0.27	0.07	0.3	0.08	0.31	0.09	0.27	0.1	0.29	0.11	0.3	0.12	0.31	0.13	0.33	0.14	0.34	0.16	0.34	0.17	0.35	0.18	0.36	0.19	0.37	0.2	0.37	0.22
2403	0.02	0.03	0.03	0.08	0.03	0.13	0.03	0.19	0.04	0.24	0.05	0.29	0.05	0.34	0.06	0.38	0.07	0.41	0.08	0.44	0.08	0.47	0.09	0.5	0.1	0.52	0.11	0.33	0.12	0.34	0.13	0.35	0.14	0.37	0.15	0.38	0.16	0.38	0.18	0.39	0.19	0.4	0.2	0.41	0.21	0.41	0.22	0.42	0.24
2404	0.09	0	0.1	0.01	0.1	0.01	0.1	0.01	0.11	0.01	0.12	0.02	0.12	0.02	0.13	0.02	0.14	0.02	0.15	0.02	0.15	0.02	0.16	0.02	0.17	0.02	0.18	0.24	0.19	0.25	0.2	0.25	0.21	0.26	0.22	0.26	0.23	0.26	0.25	0.26	0.26	0.27	0.27	0.27	0.28	0.27	0.29	0.27	0.31
2405	0	0	0	0	0	0	0	0	0	0	0	0	0	0	0	0	0	0	0	0	0	0	0	0	0	0	0	0	0	0	0	0	0	0	0	0	0	0	0	0	0	0	0	0	0	0	0	0	0
2501	0	0	0	0	0	0	0	0	0	0	0	0	0	0	0	0	0	0	0	0	0	0	0	0	0	0	0	0	0	0	0	0	0	0	0	0	0	0	0	0	0	0	0	0	0	0	0	0	0
2502	0	0.01	0.01	0	0.01	0.01	0.01	0.01	0.02	0.02	0.03	0.03	0.03	0.04	0.04	0.04	0.05	0.05	0.06	0.06	0.06	0.07	0.07	0.08	0.08	0.08	0.09	0.1	0.1	0.11	0.11	0.11	0.12	0.12	0.13	0.13	0.14	0.13	0.15	0.14	0.17	0.14	0.18	0.15	0.19	0.15	0.2	0.15	0.21
2503	0.07	0.28	0.08	0.04	0.08	0.06	0.08	0.09	0.09	0.12	0.1	0.15	0.1	0.17	0.11	0.2	0.12	0.22	0.13	0.23	0.13	0.25	0.14	0.27	0.15	0.28	0.16	0.28	0.17	0.29	0.18	0.3	0.19	0.31	0.2	0.32	0.21	0.33	0.22	0.34	0.24	0.35	0.25	0.35	0.26	0.36	0.27	0.36	0.28
2504	0	0	0	0	0	0	0	0	0	0	0	0	0	0	0	0	0	0	0	0	0	0	0	0	0	0	0	0	0	0	0	0	0	0	0	0	0	0	0	0	0	0	0	0	0	0	0	0	0
2601	0	0	0	0	0	0	0	0	0	0	0	0	0	0	0	0	0	0	0	0	0	0	0	0	0	0	0	0	0	0	0	0	0	0	0	0	0	0	0	0	0	0	0	0	0	0	0	0	0
2602	0	0	0.01	0	0.01	0.01	0.02	0.01	0.02	0.02	0.03	0.03	0.04	0.03	0.04	0.04	0.05	0.04	0.06	0.05	0.07	0.05	0.08	0.05	0.09	0.05	0.1	0.19	0.11	0.19	0.13	0.2	0.14	0.2	0.15	0.21	0.16	0.21	0.18	0.21	0.2	0.22	0.21	0.22	0.22	0.22	0.24	0.22	0.25
2603	0.01	0.02	0.02	0.05	0.02	0.09	0.03	0.13	0.03	0.17	0.04	0.21	0.05	0.24	0.05	0.27	0.06	0.3	0.07	0.32	0.08	0.34	0.09	0.36	0.1	0.37	0.11	0.46	0.12	0.48	0.14	0.49	0.15	0.5	0.16	0.5	0.17	0.51	0.19	0.52	0.21	0.52	0.22	0.53	0.23	0.53	0.25	0.53	0.26
2604	0.06	0.05	0.07	0.12	0.07	0.19	0.08	0.25	0.08	0.3	0.09	0.34	0.1	0.37	0.1	0.4	0.11	0.42	0.12	0.43	0.13	0.44	0.14	0.45	0.15	0.46	0.16	0.34	0.17	0.34	0.19	0.34	0.2	0.34	0.21	0.34	0.22	0.34	0.24	0.34	0.26	0.34	0.27	0.34	0.28	0.34	0.3	0.34	0.31
2605	0	0	0	0	0	0	0	0	0	0	0	0	0	0	0	0	0	0	0	0	0	0	0	0	0	0	0	0	0	0	0	0	0	0	0	0	0	0	0	0	0	0	0	0	0	0	0	0	0
2701	0	0	0	0	0	0	0	0	0	0	0	0	0	0	0	0	0	0	0	0	0	0	0	0	0	0	0	0	0	0	0	0	0	0	0	0	0	0	0	0	0	0	0	0	0	0	0	0	0
2702	0	0.02	0.01	0	0.01	0.01	0.01	0.01	0.02	0.02	0.02	0.02	0.03	0.02	0.04	0.03	0.04	0.03	0.05	0.03	0.05	0.03	0.06	0.04	0.07	0.04	0.08	0.13	0.08	0.14	0.09	0.14	0.1	0.15	0.11	0.15	0.12	0.16	0.13	0.16	0.14	0.17	0.14	0.17	0.15	0.17	0.16	0.18	0.17
2703	0.02	0.36	0.03	0.05	0.03	0.07	0.03	0.08	0.04	0.09	0.04	0.1	0.05	0.11	0.06	0.12	0.06	0.13	0.07	0.13	0.07	0.14	0.08	0.14	0.09	0.15	0.1	0.35	0.1	0.37	0.11	0.38	0.12	0.39	0.13	0.4	0.14	0.41	0.15	0.42	0.16	0.43	0.16	0.44	0.17	0.44	0.18	0.45	0.19
2704	0	0.37	0.01	0.08	0.01	0.16	0.01	0.23	0.02	0.3	0.02	0.37	0.03	0.42	0.04	0.47	0.04	0.52	0.05	0.56	0.05	0.6	0.06	0.64	0.07	0.67	0.08	0.3	0.08	0.31	0.09	0.33	0.1	0.34	0.11	0.35	0.12	0.36	0.13	0.37	0.14	0.39	0.14	0.39	0.15	0.4	0.16	0.41	0.17
2705	0	0	0	0	0	0	0	0	0	0	0	0	0	0	0	0	0	0	0	0	0	0	0	0	0	0	0	0	0	0	0	0	0	0	0	0	0	0	0	0	0	0	0	0	0	0	0	0	0
2801	0	0	0	0	0	0	0	0	0	0	0	0	0	0	0	0	0	0	0	0	0	0	0	0	0	0	0	0	0	0	0	0	0	0	0	0	0	0	0	0	0	0	0	0	0	0	0	0	0
2802	0.01	0	0.01	0	0.01	0.01	0.01	0.01	0.02	0.02	0.02	0.02	0.03	0.03	0.03	0.03	0.04	0.04	0.04	0.04	0.05	0.04	0.06	0.05	0.06	0.05	0.07	0.21	0.08	0.22	0.09	0.23	0.1	0.24	0.1	0.24	0.11	0.25	0.12	0.25	0.14	0.25	0.14	0.26	0.16	0.26	0.17	0.26	0.18
2803	0.07	0.04	0.07	0.09	0.07	0.16	0.07	0.22	0.08	0.28	0.08	0.33	0.09	0.38	0.09	0.42	0.1	0.46	0.1	0.49	0.11	0.52	0.12	0.54	0.12	0.56	0.13	0.34	0.14	0.34	0.15	0.35	0.16	0.35	0.16	0.35	0.17	0.35	0.18	0.35	0.2	0.35	0.2	0.35	0.22	0.35	0.23	0.35	0.24
2804	0.02	0	0.02	0	0.02	0.01	0.02	0.01	0.03	0.02	0.03	0.02	0.04	0.02	0.04	0.03	0.05	0.03	0.05	0.04	0.06	0.04	0.07	0.04	0.07	0.04	0.08	0.36	0.09	0.38	0.1	0.39	0.11	0.4	0.11	0.41	0.12	0.41	0.13	0.42	0.15	0.42	0.15	0.43	0.17	0.43	0.18	0.43	0.19
2805	0	0	0	0	0	0	0	0	0	0	0	0	0	0	0	0	0	0	0	0	0	0	0	0	0	0	0	0	0	0	0	0	0	0	0	0	0	0	0	0	0	0	0	0	0	0	0	0	0
2901	0	0	0	0	0	0	0	0	0	0	0	0	0	0	0	0	0	0	0	0	0	0	0	0	0	0	0	0	0	0	0	0	0	0	0	0	0	0	0	0	0	0	0	0	0	0	0	0	0
2902	0.02	0.02	0.02	0	0.02	0.01	0.02	0.01	0.02	0.01	0.03	0.02	0.03	0.02	0.04	0.03	0.04	0.03	0.05	0.04	0.05	0.04	0.06	0.05	0.06	0.05	0.07	0.18	0.07	0.19	0.08	0.19	0.09	0.2	0.1	0.21	0.1	0.21	0.11	0.22	0.12	0.23	0.13	0.23	0.14	0.24	0.15	0.24	0.16
2903	0.05	0.22	0.05	0.03	0.05	0.06	0.05	0.09	0.05	0.12	0.06	0.15	0.06	0.19	0.07	0.22	0.07	0.24	0.08	0.26	0.08	0.28	0.09	0.3	0.09	0.29	0.1	0.26	0.1	0.26	0.11	0.27	0.12	0.28	0.13	0.28	0.13	0.29	0.14	0.29	0.15	0.29	0.16	0.3	0.17	0.3	0.18	0.3	0.19
2904	0	0	0	0	0	0	0	0	0	0	0	0	0	0	0	0	0	0	0	0	0	0	0	0.01	0	0.05	0.01	0.02	0.01	0.03	0.02	0.03	0.03	0.04	0.04	0.04	0.04	0.04	0.05	0.05	0.06	0.05	0.07	0.05	0.08	0.06	0.09	0.06	0.1
2905	0	0	0	0	0	0	0	0	0	0	0	0	0	0	0	0	0	0	0	0	0	0	0	0	0	0	0	0	0	0	0	0	0	0	0	0	0	0	0	0	0	0	0	0	0	0	0	0	0
3001	0	0	0	0	0	0	0	0	0	0	0	0	0	0	0	0	0	0	0	0	0	0	0	0	0	0	0	0	0	0	0	0	0	0	0	0	0	0	0	0	0	0	0	0	0	0	0	0	0
3002	0.1	0	0.1	0	0.1	0.01	0.1	0.01	0.11	0.01	0.11	0.01	0.11	0.01	0.12	0.01	0.12	0.02	0.13	0.02	0.14	0.02	0.14	0.02	0.15	0.02	0.16	0.24	0.16	0.24	0.17	0.25	0.18	0.26	0.19	0.26	0.2	0.26	0.2	0.27	0.22	0.27	0.22	0.27	0.23	0.27	0.24	0.27	0.25
3003	0.15	0.07	0.15	0.13	0.15	0.2	0.15	0.25	0.16	0.3	0.16	0.35	0.16	0.39	0.17	0.43	0.17	0.46	0.18	0.49	0.19	0.51	0.19	0.53	0.2	0.54	0.21	0.52	0.21	0.53	0.22	0.54	0.23	0.54	0.24	0.55	0.25	0.55	0.25	0.56	0.27	0.56	0.27	0.56	0.28	0.56	0.29	0.56	0.3
3004	0.02	0.02	0.02	0.04	0.02	0.06	0.02	0.08	0.03	0.1	0.03	0.12	0.03	0.15	0.04	0.17	0.04	0.19	0.05	0.21	0.06	0.24	0.06	0.25	0.07	0.27	0.08	0.15	0.08	0.16	0.09	0.17	0.1	0.18	0.11	0.19	0.12	0.19	0.12	0.2	0.14	0.2	0.14	0.21	0.15	0.21	0.16	0.21	0.17
3005	0	0	0	0	0	0	0	0	0	0	0	0	0	0	0	0	0	0	0	0	0	0	0	0	0	0	0	0	0	0	0	0	0	0	0	0	0	0	0	0	0	0	0	0	0	0	0	0	0
3101	0	0	0	0	0	0	0	0	0	0	0	0	0	0	0	0	0	0	0	0	0	0	0	0	0	0	0	0	0	0	0	0	0	0	0	0	0	0	0	0	0	0	0	0	0	0	0	0	0
3102	0.82	0.02	0.82	0	0.83	0	0.83	0.01	0.84	0.01	0.84	0.02	0.85	0.03	0.85	0.03	0.86	0.04	0.86	0.05	0.87	0.06	0.87	0.07	0.88	0.08	0.89	0.09	0.89	0.1	0.9	0.12	0.91	0.13	0.92	0.14	0.92	0.16	0.93	0.17	0.94	0.18	0.95	0.19	0.96	0.2	0.96	0.21	0.97
3103	0	0	0	0	0	0	0	0	0	0	0	0	0	0	0	0	0	0	0	0	0	0	0	0	0	0	0	0	0	0	0	0	0	0	0	0	0	0	0	0	0.01	0.01	0.02	0.01	0.03	0.02	0.03	0.02	0.04
3104	0	0	0	0	0	0	0	0	0	0	0	0	0	0	0	0	0	0	0	0	0	0	0	0	0	0	0	0	0	0	0	0	0	0	0	0	0	0	0	0	0	0	0	0	0	0	0	0	0
3201	0	0	0	0	0	0	0	0	0	0	0	0	0	0	0	0	0	0	0	0	0	0	0	0	0	0	0	0	0	0	0	0	0	0	0	0	0	0	0	0	0	0	0	0	0	0	0	0	0
3202	0.48	0	0.49	0.01	0.49	0.01	0.49	0.01	0.5	0.01	0.51	0.01	0.51	0.01	0.52	0.02	0.52	0.02	0.53	0.02	0.54	0.02	0.55	0.02	0.55	0.02	0.56	0.08	0.57	0.09	0.58	0.09	0.59	0.09	0.6	0.1	0.61	0.1	0.61	0.1	0.63	0.1	0.63	0.1	0.64	0.1	0.65	0.11	0.66
3203	0.62	0.11	0.63	0.19	0.63	0.25	0.63	0.3	0.64	0.35	0.65	0.39	0.65	0.43	0.66	0.47	0.66	0.5	0.67	0.53	0.68	0.56	0.69	0.58	0.69	0.61	0.7	0.59	0.71	0.61	0.72	0.63	0.73	0.65	0.74	0.66	0.75	0.67	0.75	0.69	0.77	0.7	0.77	0.71	0.78	0.72	0.79	0.72	0.8
3204	0	0	0	0	0	0	0	0	0	0	0	0	0	0	0	0	0	0	0	0	0	0	0	0	0	0	0	0	0	0	0	0	0	0	0	0	0	0	0	0	0	0	0	0	0	0	0	0	0
3301	0	0	0	0	0	0	0	0	0	0	0	0	0	0	0	0	0	0	0	0	0	0	0	0	0	0	0	0	0	0	0	0	0	0	0	0	0	0	0	0	0	0	0	0	0	0	0	0	0
3302	0.46	0.02	0.47	0.03	0.47	0.05	0.47	0.06	0.48	0.07	0.49	0.08	0.49	0.1	0.5	0.11	0.5	0.12	0.51	0.13	0.52	0.14	0.53	0.15	0.53	0.16	0.54	0.2	0.55	0.21	0.56	0.22	0.57	0.23	0.58	0.24	0.59	0.25	0.6	0.26	0.61	0.27	0.61	0.27	0.62	0.28	0.63	0.29	0.64
3303	0.59	0	0.6	0.01	0.6	0.01	0.6	0.01	0.61	0.01	0.62	0.02	0.62	0.02	0.63	0.02	0.63	0.02	0.64	0.03	0.65	0.03	0.66	0.03	0.66	0.03	0.67	0.33	0.68	0.35	0.69	0.37	0.7	0.38	0.71	0.39	0.72	0.41	0.73	0.42	0.74	0.43	0.74	0.44	0.75	0.45	0.76	0.46	0.77
3304	0.49	0.07	0.5	0.14	0.5	0.2	0.5	0.26	0.51	0.31	0.52	0.37	0.52	0.42	0.53	0.47	0.53	0.52	0.54	0.56	0.55	0.6	0.56	0.64	0.56	0.68	0.57	0.44	0.58	0.46	0.59	0.48	0.6	0.5	0.61	0.52	0.62	0.54	0.63	0.55	0.64	0.57	0.64	0.58	0.65	0.6	0.66	0.61	0.67
3305	0	0	0	0	0	0	0	0	0	0	0	0	0	0	0	0	0	0	0	0	0	0	0	0	0	0	0	0	0	0	0	0	0	0	0	0	0	0	0	0	0	0	0	0	0	0	0	0	0
3401	0	0	0	0	0	0	0	0	0	0	0	0	0	0	0	0	0	0	0	0	0	0	0	0	0	0	0	0	0	0	0	0	0	0	0	0	0	0	0	0	0	0	0	0	0	0	0	0	0
3402	0.1	0.01	0.1	0.03	0.1	0.04	0.1	0.06	0.11	0.07	0.11	0.08	0.11	0.1	0.12	0.11	0.12	0.12	0.13	0.13	0.13	0.14	0.14	0.15	0.14	0.16	0.15	0.15	0.16	0.15	0.16	0.16	0.17	0.16	0.18	0.17	0.18	0.17	0.19	0.17	0.2	0.18	0.21	0.18	0.22	0.18	0.22	0.18	0.23
3403	0.1	0.05	0.1	0.12	0.1	0.19	0.1	0.25	0.11	0.32	0.11	0.38	0.11	0.44	0.12	0.5	0.12	0.55	0.13	0.6	0.13	0.64	0.14	0.68	0.14	0.71	0.15	0.32	0.16	0.33	0.16	0.34	0.17	0.35	0.18	0.36	0.18	0.37	0.19	0.38	0.2	0.39	0.21	0.39	0.22	0.39	0.22	0.4	0.23
3404	0.1	0.02	0.1	0.04	0.1	0.07	0.1	0.09	0.11	0.11	0.11	0.13	0.11	0.15	0.12	0.17	0.12	0.19	0.13	0.21	0.13	0.22	0.14	0.24	0.14	0.25	0.15	0.41	0.16	0.42	0.16	0.44	0.17	0.45	0.18	0.46	0.18	0.47	0.19	0.48	0.2	0.49	0.21	0.49	0.22	0.5	0.22	0.51	0.23
3405	0.1	0	0.1	0.01	0.1	0.02	0.1	0.02	0.11	0.03	0.11	0.03	0.11	0.04	0.12	0.04	0.12	0.05	0.13	0.05	0.13	0.06	0.14	0.06	0.14	0.06	0.15	0.23	0.16	0.24	0.16	0.25	0.17	0.26	0.18	0.27	0.18	0.27	0.19	0.28	0.2	0.28	0.21	0.28	0.22	0.29	0.22	0.29	0.23
3406	0	0	0	0	0	0	0	0	0	0	0	0	0	0	0	0	0	0	0	0	0	0	0	0	0	0	0	0	0	0	0	0	0	0	0	0	0	0	0	0	0	0	0	0	0	0	0	0	0
3501	0	0	0	0	0	0	0	0	0	0	0	0	0	0	0	0	0	0	0	0	0	0	0	0	0	0	0	0	0	0	0	0	0	0	0	0	0	0	0	0	0	0	0	0	0	0	0	0	0
3502	0.07	0.01	0.08	0.02	0.08	0.04	0.08	0.06	0.09	0.08	0.09	0.1	0.1	0.12	0.1	0.14	0.11	0.15	0.11	0.17	0.12	0.18	0.12	0.2	0.13	0.21	0.14	0.35	0.14	0.37	0.15	0.39	0.16	0.41	0.16	0.42	0.17	0.44	0.18	0.45	0.19	0.47	0.19	0.48	0.2	0.49	0.21	0.5	0.21
3503	0.07	0	0.08	0.01	0.08	0.01	0.08	0.02	0.09	0.03	0.09	0.03	0.1	0.04	0.1	0.05	0.11	0.05	0.11	0.06	0.12	0.06	0.12	0.07	0.13	0.07	0.14	0.04	0.14	0.04	0.15	0.05	0.16	0.05	0.16	0.05	0.17	0.05	0.18	0.05	0.19	0.06	0.19	0.06	0.2	0.06	0.21	0.06	0.21
3504	0.07	0.01	0.08	0.03	0.08	0.06	0.08	0.08	0.09	0.11	0.09	0.13	0.1	0.16	0.1	0.18	0.11	0.2	0.11	0.22	0.12	0.25	0.12	0.26	0.13	0.28	0.14	0.28	0.14	0.3	0.15	0.31	0.16	0.32	0.16	0.34	0.17	0.35	0.18	0.36	0.19	0.37	0.19	0.38	0.2	0.39	0.21	0.4	0.21
3505	0	0	0	0	0	0	0	0	0	0	0	0	0	0	0	0	0	0	0	0	0	0	0	0	0	0	0	0	0	0	0	0	0	0	0	0	0	0	0	0	0	0	0	0	0	0	0	0	0
[truncated: 101 more columns]
